# Supplementary material for: Sub-minute prediction of brain temperature based on sleep–wake state in the mouse
Source: eLife. 2021 Mar 8;10:e62073. doi: 10.7554/eLife.62073 (PMC7939547; doi:10.7554/eLife.62073)
Supplement: Supplementary file 4. — The data include the sleep scoring, the recorded temperature, and the simulated temperature for each of the three models. [file elife-62073-supp4.xlsx]

## Sheet: Sheet1
Legend:
For each of the 11 mice used in the main experiment, the following data is given below:
	* T_Raw: Recorded Temperature (degree Celsius)
	* State: Sleep scoring indexing. 4/5/6 indicate wake/NREM/REM state respectively.
	* T_Model0: Simulated temperature by the basic model.
	* T_Model1: Simulated temperature by the improved model, taking into account the prior wake-prevalence.
	* T_Model2: Simulated temperature by the final model, taking into account also the circadian process.
Data structure:
The data has 86400 lines, each representing a 4s epoch, where the first line is the first 4 seconds after light onset (LD12:12).
After 48 hours (i.e. 43200 samples) of baseline, a 6 hours (5400 samples) of sleep deprivation was scheduled starting at light onset.
The remaining recording time (42 hours, 37800 samples) is recovery from deprivation, completing for total of 4-day recording (96 hours).
DATA:
Mouse #603						Mouse #606						Mouse #608						Mouse #609						Mouse #612						Mouse #613						Mouse #616						Mouse #617						Mouse #619
T_Raw	State	T_Model0	T_Model1	T_Model2		T_Raw	State	T_Model0	T_Model1	T_Model2		T_Raw	State	T_Model0	T_Model1	T_Model2		T_Raw	State	T_Model0	T_Model1	T_Model2		T_Raw	State	T_Model0	T_Model1	T_Model2		T_Raw	State	T_Model0	T_Model1	T_Model2		T_Raw	State	T_Model0	T_Model1	T_Model2		T_Raw	State	T_Model0	T_Model1	T_Model2		T_Raw	State
35.723	4	35.5506	35.5506	35.5506		36.2963	4	36.3237	36.3237	36.3237		32.7784	5	32.5758	32.5758	32.5758		35.0225	6	34.7914	34.7914	34.7914		34.3292	4	34.3546	34.3546	34.3546		35.174	4	34.9162	34.9162	34.9162		35.6672	4	35.5402	35.5402	35.5402		36.2132	4	36.2465	36.2465	36.2465		36.119	4
35.7212	4	35.5528	35.551	35.5514		36.3056	4	36.3262	36.3245	36.3251		32.7782	5	32.5705	32.5687	32.5683		35.0566	6	34.7986	34.7986	34.7984		34.3264	4	34.3566	34.355	34.3556		35.1416	4	34.9219	34.9282	34.927		35.6717	4	35.544	35.5421	35.5418		36.2069	4	36.248	36.2453	36.2456		36.1303	4
35.7046	4	35.555	35.5513	35.5522		36.3121	4	36.3286	36.3253	36.3266		32.7777	5	32.5653	32.5617	32.561		35.106	4	34.8058	34.8059	34.8055		34.323	4	34.3586	34.3555	34.3566		35.1071	4	34.9276	34.9401	34.9376		35.6708	4	35.5477	35.5439	35.5433		36.2209	4	36.2496	36.2442	36.2446		36.134	4
35.6847	4	35.5571	35.5517	35.553		36.3045	4	36.3311	36.3261	36.328		32.7825	5	32.5601	32.5547	32.5537		35.0365	4	34.813	34.8131	34.8125		34.3238	4	34.3606	34.356	34.3576		35.082	4	34.9333	34.9518	34.9482		35.6688	4	35.5514	35.5458	35.5448		36.2334	4	36.2511	36.243	36.2437		36.1279	4
35.6586	4	35.5593	35.552	35.5538		36.2809	4	36.3336	36.3269	36.3294		32.7983	5	32.5549	32.5478	32.5466		35.0933	4	34.8202	34.8202	34.8194		34.3259	4	34.3626	34.3565	34.3587		35.0712	4	34.9389	34.9633	34.9587		35.6636	4	35.5552	35.5476	35.5463		36.2487	4	36.2527	36.2419	36.2428		36.1261	4
35.6337	4	35.5614	35.5524	35.5546		36.2649	4	36.336	36.3277	36.3308		32.8174	5	32.5498	32.5409	32.5395		35.0491	4	34.8273	34.8274	34.8263		34.3306	4	34.3646	34.3569	34.3597		35.0572	4	34.9445	34.9747	34.9691		35.655	4	35.5588	35.5494	35.5478		36.2632	4	36.2542	36.2407	36.242		36.1247	4
35.6163	4	35.5636	35.5527	35.5554		36.2528	4	36.3384	36.3285	36.3322		32.819	4	32.5554	32.5464	32.5446		35.0443	4	34.8344	34.8344	34.8332		34.331	4	34.3666	34.3574	34.3607		35.0413	4	34.9502	34.9859	34.9793		35.647	4	35.5625	35.5512	35.5493		36.2665	4	36.2557	36.2396	36.2411		36.1152	4
35.5948	4	35.5657	35.553	35.5561		36.2574	4	36.3409	36.3293	36.3336		32.7985	4	32.561	32.5518	32.5497		35.0097	4	34.8415	34.8415	34.8401		34.3278	4	34.3686	34.3579	34.3617		35.033	4	34.9558	34.9969	34.9895		35.646	4	35.5662	35.553	35.5507		36.2749	4	36.2572	36.2384	36.2402		36.1028	4
35.602	4	35.5679	35.5534	35.5569		36.2685	4	36.3433	36.3301	36.335		32.7744	4	32.5665	32.5572	32.5548		34.9583	4	34.8486	34.8485	34.8469		34.3258	4	34.3705	34.3583	34.3627		35.0167	5	34.9515	34.99	34.9833		35.6459	4	35.5698	35.5548	35.5522		36.2799	4	36.2588	36.2373	36.2394		36.0912	4
35.5928	4	35.57	35.5537	35.5577		36.2878	4	36.3457	36.3309	36.3364		32.7584	5	32.5613	32.5503	32.5475		34.8993	4	34.8556	34.8555	34.8537		34.3291	4	34.3725	34.3587	34.3637		35.0024	5	34.9472	34.9831	34.9772		35.6458	4	35.5735	35.5566	35.5536		36.2741	4	36.2603	36.2362	36.2385		36.0798	4
35.5735	4	35.5721	35.554	35.5584		36.2945	4	36.3481	36.3317	36.3377		32.7496	5	32.5561	32.5434	32.5404		34.8765	4	34.8626	34.8624	34.8604		34.3359	4	34.3744	34.3592	34.3646		34.9835	5	34.9429	34.9762	34.9711		35.6433	4	35.5771	35.5583	35.5551		36.266	4	36.2618	36.2351	36.2377		36.0678	4
35.5631	4	35.5742	35.5543	35.5592		36.2848	4	36.3505	36.3325	36.3391		32.7354	5	32.551	32.5365	32.5334		34.9325	4	34.8696	34.8693	34.8671		34.3368	4	34.3764	34.3596	34.3656		34.9676	5	34.9386	34.9693	34.965		35.6426	4	35.5807	35.5601	35.5565		36.257	4	36.2633	36.234	36.2368		36.0556	4
35.5402	4	35.5763	35.5546	35.5599		36.2873	4	36.3529	36.3333	36.3405		32.7311	5	32.5459	32.5298	32.5265		34.8724	4	34.8765	34.8762	34.8738		34.3374	4	34.3783	34.36	34.3666		34.9592	5	34.9343	34.9624	34.959		35.6337	4	35.5843	35.5618	35.5579		36.2624	4	36.2648	36.2329	36.236		36.0522	4
35.5325	4	35.5784	35.5549	35.5606		36.2848	4	36.3553	36.3341	36.3418		32.7265	5	32.5408	32.5231	32.5197		34.9068	4	34.8834	34.883	34.8805		34.3407	4	34.3803	34.3604	34.3676		34.9631	4	34.94	34.9737	34.9694		35.6281	4	35.5879	35.5636	35.5593		36.2673	4	36.2663	36.2318	36.2352		36.0594	4
35.5174	4	35.5805	35.5552	35.5614		36.292	4	36.3577	36.3349	36.3432		32.7261	5	32.5357	32.5164	32.5129		34.8705	5	34.8738	34.8722	34.8711		34.3489	4	34.3822	34.3608	34.3685		34.9599	5	34.9357	34.9668	34.9634		35.6285	4	35.5915	35.5653	35.5606		36.2643	4	36.2678	36.2307	36.2344		36.0814	4
35.5112	4	35.5826	35.5555	35.5621		36.2988	4	36.3601	36.3356	36.3445		32.7314	5	32.5306	32.5098	32.5063		34.8715	5	34.8643	34.8615	34.8619		34.3468	4	34.3841	34.3612	34.3695		34.9425	5	34.9314	34.96	34.9574		35.6228	4	35.595	35.567	35.562		36.2557	4	36.2693	36.2296	36.2336		36.0924	4
35.5151	4	35.5846	35.5558	35.5628		36.3023	4	36.3624	36.3364	36.3458		32.7282	4	32.5363	32.5155	32.5115		34.8357	5	34.8548	34.8508	34.8528		34.3423	4	34.386	34.3616	34.3704		34.9273	5	34.9272	34.9531	34.9514		35.623	4	35.5985	35.5687	35.5634		36.2472	4	36.2708	36.2285	36.2328		36.0926	4
35.5308	4	35.5867	35.5561	35.5635		36.3064	4	36.3648	36.3372	36.3472		32.7182	5	32.5312	32.5089	32.5049		34.8077	5	34.8455	34.8403	34.8437		34.3242	4	34.3879	34.362	34.3714		34.9238	5	34.9229	34.9463	34.9455		35.6323	4	35.6021	35.5704	35.5647		36.2407	4	36.2722	36.2274	36.232		36.0791	4
35.5409	4	35.5888	35.5563	35.5642		36.3014	4	36.3671	36.338	36.3485		32.6992	5	32.5262	32.5024	32.4983		34.8329	5	34.8361	34.8298	34.8347		34.3101	4	34.3898	34.3624	34.3723		34.9185	5	34.9187	34.9395	34.9396		35.6312	4	35.6056	35.572	35.566		36.2344	4	36.2737	36.2263	36.2312		36.0639	4
35.5682	4	35.5908	35.5566	35.5649		36.301	4	36.3695	36.3388	36.3498		32.6924	5	32.5212	32.4959	32.4918		34.8416	5	34.8269	34.8194	34.8259		34.2992	4	34.3917	34.3627	34.3733		34.9077	5	34.9144	34.9327	34.9338		35.6302	4	35.6091	35.5737	35.5674		36.2321	4	36.2752	36.2253	36.2304		36.056	4
35.5859	4	35.5929	35.5569	35.5656		36.3042	4	36.3718	36.3395	36.3511		32.6835	5	32.5162	32.4895	32.4854		34.8352	4	34.834	34.8266	34.8328		34.2976	4	34.3936	34.3631	34.3742		34.8993	5	34.9102	34.9259	34.928		35.6292	4	35.6126	35.5753	35.5687		36.222	4	36.2766	36.2242	36.2296		36.0675	4
35.6011	4	35.5949	35.5571	35.5663		36.2938	4	36.3742	36.3403	36.3524		32.6805	5	32.5113	32.4832	32.4791		34.8199	4	34.8411	34.8336	34.8396		34.3015	4	34.3955	34.3635	34.3751		34.8969	5	34.9059	34.9191	34.9223		35.6224	4	35.616	35.577	35.57		36.2097	4	36.2781	36.2231	36.2289		36.0751	4
35.6238	4	35.5969	35.5574	35.567		36.2872	4	36.3765	36.3411	36.3537		32.6764	5	32.5063	32.4769	32.4729		34.816	4	34.8481	34.8407	34.8464		34.3035	4	34.3973	34.3638	34.3761		34.899	5	34.9017	34.9123	34.9166		35.6162	4	35.6195	35.5786	35.5713		36.1985	4	36.2796	36.2221	36.2281		36.0771	4
35.6245	4	35.5989	35.5576	35.5677		36.2862	4	36.3788	36.3418	36.355		32.6679	5	32.5014	32.4706	32.4668		34.8185	4	34.8551	34.8477	34.8532		34.2981	4	34.3992	34.3642	34.377		34.8979	5	34.8975	34.9056	34.9109		35.6179	4	35.6229	35.5802	35.5725		36.1802	4	36.281	36.221	36.2274		36.0959	4
35.6281	4	35.601	35.5579	35.5683		36.2796	4	36.3811	36.3426	36.3563		32.659	5	32.4965	32.4645	32.4607		34.8009	4	34.8621	34.8547	34.86		34.29	4	34.4011	34.3645	34.3779		34.8966	5	34.8933	34.8988	34.9053		35.6235	4	35.6264	35.5818	35.5738		36.1762	4	36.2825	36.22	36.2266		36.1149	4
35.6192	4	35.603	35.5581	35.569		36.2841	4	36.3834	36.3434	36.3575		32.6492	5	32.4917	32.4583	32.4547		34.7851	4	34.8691	34.8616	34.8667		34.2793	4	34.4029	34.3648	34.3788		34.887	5	34.8891	34.8921	34.8997		35.6213	4	35.6298	35.5834	35.575		36.1881	4	36.2839	36.219	36.2259		36.1286	4
35.6071	4	35.605	35.5584	35.5697		36.2913	4	36.3857	36.3441	36.3588		32.6413	5	32.4868	32.4523	32.4488		34.8197	4	34.8761	34.8686	34.8733		34.2763	4	34.4048	34.3652	34.3797		34.8781	5	34.8849	34.8854	34.8942		35.6193	4	35.6332	35.585	35.5763		36.1968	4	36.2854	36.218	36.2251		36.1329	4
35.59	4	35.607	35.5586	35.5703		36.3083	4	36.388	36.3449	36.36		32.6326	5	32.482	32.4462	32.443		34.8111	5	34.8665	34.8578	34.8641		34.2776	4	34.4066	34.3655	34.3806		34.8736	5	34.8807	34.8787	34.8887		35.615	4	35.6366	35.5866	35.5775		36.2029	4	36.2868	36.217	36.2244		36.1187	4
35.5723	4	35.609	35.5588	35.571		36.3203	4	36.3902	36.3456	36.3613		32.6193	5	32.4772	32.4403	32.4372		34.8086	5	34.857	34.8472	34.8549		34.2796	4	34.4084	34.3658	34.3815		34.8744	5	34.8765	34.872	34.8832		35.6136	4	35.64	35.5882	35.5787		36.2148	4	36.2882	36.216	36.2237		36.1003	4
35.576	4	35.611	35.559	35.5716		36.3343	4	36.3925	36.3464	36.3625		32.612	5	32.4725	32.4344	32.4315		34.8282	5	34.8476	34.8367	34.8458		34.2852	4	34.4102	34.3661	34.3824		34.8731	4	34.8823	34.8843	34.8945		35.608	4	35.6433	35.5897	35.5799		36.2251	4	36.2897	36.215	36.223		36.0903	4
35.5873	4	35.6129	35.5593	35.5723		36.3431	4	36.3948	36.3472	36.3638		32.6124	5	32.4677	32.4285	32.4259		34.8035	5	34.8383	34.8263	34.8368		34.2765	4	34.4121	34.3664	34.3833		34.8735	5	34.8781	34.8776	34.889		35.6064	4	35.6467	35.5913	35.5811		36.2368	4	36.2911	36.214	36.2222		36.0885	4
35.5777	4	35.6149	35.5595	35.5729		36.3565	4	36.397	36.3479	36.365		32.6111	5	32.463	32.4227	32.4204		34.7907	4	34.8454	34.8334	34.8437		34.2636	4	34.4139	34.3667	34.3842		34.8631	5	34.8739	34.8709	34.8835		35.6073	4	35.65	35.5928	35.5823		36.2386	4	36.2925	36.213	36.2215		36.0906	4
35.564	4	35.6169	35.5597	35.5735		36.3598	4	36.3993	36.3487	36.3662		32.6068	5	32.4583	32.4169	32.4149		34.7936	5	34.836	34.823	34.8347		34.2503	4	34.4157	34.367	34.3851		34.8628	5	34.8697	34.8642	34.8781		35.6188	4	35.6533	35.5943	35.5835		36.2502	4	36.2939	36.212	36.2208		36.0996	4
35.5575	4	35.6188	35.5599	35.5741		36.35	4	36.4015	36.3494	36.3674		32.6021	5	32.4536	32.4112	32.4095		34.7893	5	34.8268	34.8126	34.8258		34.2407	4	34.4175	34.3673	34.3859		34.8645	5	34.8655	34.8576	34.8728		35.6345	4	35.6566	35.5958	35.5847		36.2569	4	36.2953	36.2111	36.2201		36.128	4
35.5696	4	35.6208	35.5602	35.5748		36.3429	4	36.4038	36.3501	36.3686		32.5914	5	32.449	32.4056	32.4042		34.7549	5	34.8176	34.8024	34.817		34.2436	4	34.4193	34.3675	34.3868		34.8712	5	34.8614	34.8509	34.8674		35.6425	4	35.6599	35.5973	35.5858		36.2551	4	36.2967	36.2101	36.2193		36.1576	4
35.5575	4	35.6227	35.5604	35.5754		36.3414	4	36.406	36.3509	36.3699		32.576	5	32.4443	32.4	32.399		34.7859	5	34.8085	34.7923	34.8083		34.2584	4	34.421	34.3678	34.3877		34.8672	5	34.8572	34.8443	34.8621		35.6426	4	35.6632	35.5988	35.587		36.2496	4	36.2981	36.2091	36.2186		36.1635	4
35.5471	4	35.6246	35.5606	35.576		36.3306	4	36.4082	36.3516	36.371		32.5611	5	32.4397	32.3944	32.3938		34.7069	4	34.8156	34.7995	34.8153		34.2923	4	34.4228	34.3681	34.3885		34.865	5	34.853	34.8377	34.8569		35.6404	4	35.6665	35.6003	35.5881		36.245	4	36.2995	36.2082	36.2179		36.1569	4
35.5334	4	35.6266	35.5608	35.5766		36.3255	4	36.4104	36.3524	36.3722		32.5496	5	32.4351	32.3889	32.3887		34.7894	5	34.8065	34.7894	34.8066		34.3067	4	34.4246	34.3683	34.3894		34.8646	5	34.8489	34.8311	34.8516		35.6322	4	35.6698	35.6017	35.5892		36.2441	4	36.3009	36.2072	36.2172		36.1506	4
35.5294	4	35.6285	35.561	35.5772		36.3316	4	36.4126	36.3531	36.3734		32.5456	5	32.4306	32.3835	32.3836		34.7889	5	34.7975	34.7794	34.798		34.3196	4	34.4263	34.3686	34.3903		34.8709	5	34.8447	34.8245	34.8464		35.6233	4	35.673	35.6032	35.5904		36.2335	4	36.3023	36.2063	36.2164		36.1615	4
35.529	4	35.6304	35.5612	35.5777		36.3432	4	36.4148	36.3538	36.3746		32.5389	5	32.426	32.3781	32.3786		34.7316	5	34.7885	34.7694	34.7895		34.3453	4	34.4281	34.3688	34.3911		34.8677	5	34.8406	34.8179	34.8413		35.6129	4	35.6762	35.6046	35.5915		36.2244	4	36.3037	36.2053	36.2157		36.1685	4
35.517	4	35.6323	35.5614	35.5783		36.3504	4	36.417	36.3546	36.3758		32.5336	5	32.4215	32.3727	32.3736		34.7055	5	34.7795	34.7596	34.7811		34.3719	4	34.4298	34.3691	34.3919		34.8574	5	34.8364	34.8113	34.8362		35.603	4	35.6795	35.6061	35.5926		36.2345	4	36.3051	36.2044	36.215		36.1833	4
35.5164	4	35.6342	35.5616	35.5789		36.3546	4	36.4192	36.3553	36.377		32.5301	5	32.417	32.3674	32.3688		34.7993	5	34.7707	34.7498	34.7728		34.3704	4	34.4316	34.3693	34.3928		34.8467	5	34.8323	34.8048	34.8311		35.5928	4	35.6827	35.6075	35.5937		36.2582	4	36.3065	36.2034	36.2143		36.1983	4
35.5174	4	35.6361	35.5618	35.5795		36.3544	4	36.4214	36.356	36.3781		32.5339	5	32.4125	32.3621	32.3639		34.7903	4	34.778	34.7573	34.7799		34.3788	4	34.4333	34.3695	34.3936		34.8404	5	34.8282	34.7983	34.8261		35.5818	4	35.6859	35.6089	35.5948		36.2653	4	36.3078	36.2025	36.2136		36.2118	4
35.5275	4	35.638	35.562	35.58		36.3499	4	36.4236	36.3568	36.3793		32.5251	4	32.4186	32.3689	32.3698		34.7358	5	34.7691	34.7475	34.7716		34.3865	4	34.4351	34.3697	34.3945		34.8356	6	34.8341	34.8116	34.838		35.5697	4	35.6891	35.6103	35.5958		36.275	4	36.3092	36.2016	36.2128		36.2199	4
35.5247	4	35.6399	35.5622	35.5806		36.3489	4	36.4257	36.3575	36.3804		32.518	5	32.4141	32.3636	32.365		34.7679	5	34.7603	34.7378	34.7633		34.3844	4	34.4368	34.37	34.3953		34.8307	4	34.8401	34.8247	34.8498		35.5581	4	35.6922	35.6117	35.5969		36.2729	4	36.3106	36.2007	36.2121		36.2208	4
35.531	4	35.6418	35.5623	35.5812		36.3484	4	36.4279	36.3582	36.3816		32.5062	5	32.4096	32.3584	32.3601		34.7663	5	34.7516	34.7282	34.7552		34.3745	4	34.4385	34.3702	34.3961		34.8241	4	34.846	34.8376	34.8615		35.5491	4	35.6954	35.613	35.598		36.2796	4	36.3119	36.1997	36.2114		36.2177	4
35.5326	4	35.6436	35.5625	35.5817		36.3487	4	36.4301	36.359	36.3828		32.4955	5	32.4052	32.3532	32.3554		34.7579	5	34.7429	34.7187	34.7471		34.3732	4	34.4402	34.3704	34.3969		34.8234	4	34.852	34.8504	34.873		35.5357	4	35.6985	35.6144	35.5991		36.2789	4	36.3133	36.1988	36.2107		36.2129	4
35.53	4	35.6455	35.5627	35.5822		36.3386	4	36.4322	36.3597	36.3839		32.4905	5	32.4008	32.348	32.3507		34.7553	5	34.7343	34.7093	34.7391		34.381	4	34.4419	34.3706	34.3977		34.8191	4	34.8579	34.8629	34.8845		35.5189	4	35.7017	35.6157	35.6001		36.2809	4	36.3146	36.1979	36.21		36.2105	4
35.5357	4	35.6474	35.5628	35.5828		36.3268	4	36.4343	36.3605	36.3851		32.4908	5	32.3964	32.3429	32.346		34.751	5	34.7257	34.6999	34.7312		34.385	4	34.4436	34.3707	34.3985		34.8174	5	34.8537	34.8562	34.8791		35.5005	4	35.7048	35.6171	35.6012		36.2801	4	36.316	36.197	36.2093		36.2018	4
35.5431	4	35.6492	35.563	35.5833		36.3174	4	36.4365	36.3612	36.3862		32.488	5	32.392	32.3379	32.3415		34.7557	5	34.7172	34.6907	34.7233		34.3697	4	34.4453	34.3709	34.3993		34.8262	5	34.8495	34.8496	34.8737		35.4823	4	35.7079	35.6184	35.6022		36.2805	4	36.3173	36.1961	36.2086		36.1963	4
35.5357	4	35.6511	35.5632	35.5838		36.3134	4	36.4386	36.3619	36.3873		32.4844	4	32.3981	32.3448	32.3474		34.754	4	34.7248	34.6985	34.7307		34.3487	4	34.447	34.3711	34.4		34.8293	5	34.8454	34.8429	34.8684		35.4647	4	35.711	35.6197	35.6032		36.2856	4	36.3187	36.1952	36.2079		36.207	4
35.5229	4	35.6529	35.5633	35.5844		36.3161	4	36.4407	36.3627	36.3885		32.4733	5	32.3937	32.3397	32.3428		34.7412	4	34.7323	34.7062	34.7381		34.3342	4	34.4487	34.3713	34.4008		34.8268	5	34.8412	34.8363	34.8631		35.4478	4	35.7141	35.621	35.6043		36.2815	4	36.32	36.1943	36.2072		36.2257	4
35.51	4	35.6547	35.5635	35.5849		36.325	4	36.4428	36.3634	36.3896		32.4565	5	32.3894	32.3347	32.3382		34.722	5	34.7237	34.6969	34.7302		34.316	4	34.4503	34.3715	34.4016		34.8293	5	34.8371	34.8297	34.8579		35.4348	4	35.7172	35.6223	35.6053		36.2749	4	36.3214	36.1934	36.2065		36.2368	4
35.5014	4	35.6566	35.5636	35.5854		36.3318	4	36.4449	36.3642	36.3907		32.4488	5	32.385	32.3297	32.3337		34.7163	5	34.7152	34.6876	34.7223		34.3011	4	34.452	34.3716	34.4023		34.8382	5	34.833	34.8231	34.8526		35.4208	4	35.7202	35.6236	35.6063		36.2722	4	36.3227	36.1925	36.2058		36.2431	4
35.503	4	35.6584	35.5638	35.5859		36.3402	4	36.447	36.3649	36.3918		32.4448	5	32.3807	32.3248	32.3292		34.713	5	34.7068	34.6785	34.7146		34.31	4	34.4537	34.3718	34.403		34.8417	5	34.8288	34.8165	34.8474		35.4161	4	35.7233	35.6248	35.6073		36.2704	4	36.324	36.1916	36.2051		36.2453	4
35.51	4	35.6602	35.564	35.5864		36.3465	4	36.4491	36.3656	36.3929		32.4456	5	32.3764	32.3199	32.3248		34.7156	5	34.6984	34.6694	34.7069		34.3234	4	34.4553	34.372	34.4038		34.8439	5	34.8247	34.8099	34.8423		35.4148	4	35.7263	35.6261	35.6083		36.2639	4	36.3253	36.1907	36.2045		36.2437	4
35.5253	4	35.662	35.5641	35.5869		36.3503	4	36.4512	36.3664	36.3941		32.4473	5	32.3721	32.3151	32.3204		34.7116	5	34.6901	34.6604	34.6993		34.3483	4	34.457	34.3721	34.4045		34.8426	5	34.8206	34.8034	34.8372		35.4147	4	35.7294	35.6274	35.6093		36.2453	4	36.3267	36.1898	36.2038		36.2477	4
35.5164	4	35.6638	35.5643	35.5874		36.3448	4	36.4533	36.3671	36.3952		32.4498	5	32.3679	32.3103	32.3161		34.6991	5	34.6819	34.6514	34.6918		34.3683	4	34.4586	34.3723	34.4052		34.8416	5	34.8165	34.7968	34.8321		35.4105	4	35.7324	35.6286	35.6103		36.2235	4	36.328	36.1889	36.2031		36.2489	4
35.4976	4	35.6656	35.5644	35.5879		36.338	4	36.4554	36.3679	36.3963		32.449	5	32.3636	32.3056	32.3118		34.7005	5	34.6737	34.6426	34.6843		34.3886	4	34.4602	34.3724	34.4059		34.8479	5	34.8124	34.7903	34.827		35.4039	4	35.7354	35.6298	35.6113		36.2261	4	36.3293	36.1881	36.2024		36.2399	4
35.4927	4	35.6674	35.5646	35.5883		36.338	4	36.4574	36.3686	36.3974		32.4415	5	32.3594	32.3009	32.3076		34.6986	5	34.6655	34.6338	34.677		34.407	4	34.4619	34.3726	34.4067		34.8543	5	34.8083	34.7838	34.822		35.3971	4	35.7384	35.631	35.6123		36.2394	4	36.3306	36.1872	36.2017		36.2317	4
35.4929	4	35.6692	35.5647	35.5888		36.3463	4	36.4595	36.3694	36.3985		32.4377	5	32.3552	32.2962	32.3035		34.6897	4	34.6733	34.6419	34.6846		34.4285	4	34.4635	34.3727	34.4074		34.8452	4	34.8143	34.7972	34.8339		35.3887	4	35.7414	35.6322	35.6133		36.242	4	36.3319	36.1864	36.201		36.2268	4
35.4956	4	35.671	35.5649	35.5893		36.3642	4	36.4615	36.3701	36.3995		32.4352	5	32.3511	32.2916	32.2994		34.6762	4	34.681	34.6499	34.6922		34.4354	4	34.4651	34.3729	34.408		34.8338	4	34.8203	34.8105	34.8457		35.3868	4	35.7443	35.6334	35.6142		36.2549	4	36.3332	36.1855	36.2003		36.2162	4
35.4939	4	35.6727	35.565	35.5898		36.3621	4	36.4636	36.3709	36.4006		32.4342	5	32.3469	32.2871	32.2953		34.6619	5	34.6728	34.6411	34.6847		34.4458	4	34.4667	34.373	34.4087		34.837	4	34.8263	34.8236	34.8574		35.3814	4	35.7473	35.6346	35.6152		36.2625	4	36.3345	36.1847	36.1997		36.2015	4
35.4821	4	35.6745	35.5652	35.5902		36.3598	4	36.4656	36.3716	36.4017		32.4338	5	32.3428	32.2826	32.2913		34.6498	5	34.6646	34.6323	34.6774		34.4492	4	34.4683	34.3731	34.4094		34.8549	4	34.8323	34.8365	34.869		35.3764	4	35.7502	35.6358	35.6162		36.2737	4	36.3358	36.1839	36.199		36.1899	4
35.4598	4	35.6763	35.5654	35.5907		36.3631	4	36.4677	36.3724	36.4028		32.4318	4	32.3491	32.29	32.2975		34.6413	5	34.6566	34.6237	34.6701		34.4474	4	34.4699	34.3732	34.41		34.8839	4	34.8383	34.8492	34.8805		35.3764	4	35.7532	35.637	35.6171		36.2731	4	36.3371	36.1831	36.1983		36.1857	4
35.4457	4	35.678	35.5655	35.5912		36.3507	4	36.4697	36.3731	36.4039		32.4148	5	32.3449	32.2854	32.2935		34.6436	5	34.6486	34.6151	34.6628		34.4454	4	34.4715	34.3734	34.4107		34.9109	4	34.8442	34.8617	34.8918		35.3768	4	35.7561	35.6381	35.6181		36.2729	4	36.3383	36.1823	36.1976		36.1815	4
35.4426	4	35.6798	35.5657	35.5916		36.3182	4	36.4717	36.3739	36.4049		32.4008	5	32.3408	32.2809	32.2895		34.6469	5	34.6406	34.6065	34.6557		34.458	4	34.4731	34.3735	34.4113		34.9321	4	34.8502	34.874	34.903		35.3793	4	35.759	35.6393	35.619		36.2724	4	36.3396	36.1815	36.1969		36.1719	4
35.4477	4	35.6815	35.5658	35.5921		36.3091	4	36.4737	36.3746	36.406		32.3902	5	32.3367	32.2765	32.2855		34.6521	5	34.6327	34.5981	34.6486		34.4801	4	34.4747	34.3736	34.412		34.9445	4	34.8561	34.8862	34.9141		35.3837	4	35.7619	35.6404	35.62		36.2664	4	36.3409	36.1807	36.1962		36.1644	4
35.4636	4	35.6832	35.566	35.5925		36.3155	4	36.4757	36.3754	36.4071		32.3846	5	32.3326	32.2721	32.2816		34.6521	5	34.6248	34.5897	34.6416		34.4894	4	34.4763	34.3737	34.4126		34.959	4	34.862	34.8981	34.9251		35.3875	4	35.7648	35.6415	35.6209		36.2488	4	36.3422	36.1799	36.1955		36.1712	4
35.4813	4	35.685	35.5661	35.593		36.3242	4	36.4777	36.3762	36.4081		32.3877	5	32.3285	32.2678	32.2778		34.6575	5	34.617	34.5813	34.6346		34.4979	4	34.4778	34.3738	34.4132		34.9754	4	34.8678	34.9099	34.9359		35.3811	4	35.7677	35.6426	35.6219		36.244	4	36.3434	36.1791	36.1948		36.1867	4
35.4978	4	35.6867	35.5663	35.5934		36.3404	4	36.4797	36.3769	36.4092		32.3886	5	32.3245	32.2635	32.274		34.6479	5	34.6093	34.5731	34.6277		34.4984	4	34.4794	34.3739	34.4138		34.9984	4	34.8737	34.9215	34.9466		35.375	4	35.7705	35.6438	35.6228		36.2439	4	36.3447	36.1784	36.1942		36.1914	4
35.5166	4	35.6884	35.5665	35.5939		36.3588	4	36.4817	36.3777	36.4103		32.3858	5	32.3204	32.2592	32.2703		34.6469	5	34.6016	34.5649	34.6209		34.4905	4	34.481	34.3739	34.4144		35.0252	4	34.8795	34.933	34.9572		35.3555	5	35.7566	35.6287	35.6073		36.2362	4	36.346	36.1776	36.1935		36.1819	4
35.5297	4	35.6901	35.5666	35.5943		36.3761	4	36.4837	36.3784	36.4113		32.3898	5	32.3164	32.255	32.2666		34.6425	5	34.5939	34.5568	34.6142		34.4999	4	34.4825	34.374	34.415		35.058	4	34.8853	34.9443	34.9677		35.3291	5	35.7428	35.6137	35.592		36.2169	4	36.3472	36.1769	36.1928		36.1679	4
35.5623	4	35.6918	35.5668	35.5948		36.3987	4	36.4857	36.3792	36.4124		32.3885	5	32.3124	32.2508	32.2629		34.6406	5	34.5863	34.5488	34.6075		34.5111	4	34.4841	34.3741	34.4156		35.089	4	34.8911	34.9555	34.9781		35.3017	5	35.7291	35.5989	35.5768		36.2147	4	36.3485	36.1761	36.1921		36.157	4
35.5881	4	35.6935	35.567	35.5952		36.409	4	36.4877	36.3799	36.4134		32.3898	5	32.3085	32.2466	32.2593		34.6454	5	34.5788	34.5408	34.6009		34.5135	4	34.4856	34.3742	34.4162		35.1238	4	34.8969	34.9665	34.9884		35.2761	5	35.7155	35.5842	35.5617		36.2175	4	36.3497	36.1754	36.1914		36.1518	4
35.5919	4	35.6952	35.5671	35.5956		36.4015	4	36.4896	36.3806	36.4144		32.3906	5	32.3045	32.2425	32.2557		34.6417	5	34.5713	34.5329	34.5944		34.5232	4	34.4872	34.3742	34.4168		35.1545	4	34.9027	34.9774	34.9985		35.2522	5	35.7019	35.5696	35.5467		36.2164	4	36.351	36.1747	36.1907		36.1455	4
35.5884	4	35.6969	35.5673	35.5961		36.3822	4	36.4916	36.3814	36.4155		32.3968	5	32.3006	32.2385	32.2522		34.6428	5	34.5639	34.5251	34.5879		34.5371	4	34.4887	34.3743	34.4173		35.1884	4	34.9084	34.9881	35.0086		35.2292	5	35.6885	35.5551	35.5319		36.2072	4	36.3522	36.174	36.19		36.1385	4
35.581	4	35.6986	35.5674	35.5965		36.3625	4	36.4935	36.3821	36.4165		32.4007	5	32.2967	32.2345	32.2487		34.6347	5	34.5565	34.5174	34.5815		34.5582	4	34.4902	34.3743	34.4179		35.217	4	34.9142	34.9987	35.0185		35.2067	5	35.6751	35.5407	35.5172		36.2016	4	36.3535	36.1732	36.1893		36.1326	4
35.5832	4	35.7003	35.5676	35.5969		36.3458	4	36.4955	36.3828	36.4175		32.4031	5	32.2928	32.2305	32.2453		34.6326	5	34.5492	34.5097	34.5751		34.5805	4	34.4917	34.3744	34.4184		35.2417	4	34.9199	35.0091	35.0284		35.1847	5	35.6619	35.5264	35.5025		36.1946	4	36.3547	36.1725	36.1887		36.1274	4
35.5941	4	35.702	35.5678	35.5973		36.3372	4	36.4974	36.3835	36.4186		32.4051	5	32.2889	32.2265	32.2419		34.6221	5	34.5419	34.502	34.5689		34.5898	4	34.4932	34.3744	34.419		35.2619	4	34.9256	35.0194	35.0381		35.1634	5	35.6487	35.5122	35.4881		36.1833	4	36.3559	36.1719	36.188		36.123	4
35.5998	4	35.7036	35.5679	35.5977		36.3391	4	36.4994	36.3843	36.4196		32.4071	5	32.2851	32.2226	32.2386		34.6295	5	34.5347	34.4945	34.5626		34.5872	4	34.4947	34.3744	34.4195		35.2722	4	34.9313	35.0296	35.0477		35.1471	5	35.6356	35.4981	35.4737		36.1716	4	36.3571	36.1712	36.1873		36.1222	4
35.6081	4	35.7053	35.5681	35.5981		36.3591	4	36.5013	36.385	36.4206		32.4064	5	32.2812	32.2187	32.2353		34.6376	5	34.5275	34.487	34.5565		34.5836	4	34.4963	34.3745	34.42		35.2894	4	34.9369	35.0397	35.0572		35.1319	5	35.6226	35.4841	35.4594		36.1709	4	36.3584	36.1705	36.1866		36.1195	4
35.6171	4	35.7069	35.5682	35.5985		36.3878	4	36.5032	36.3857	36.4216		32.4013	5	32.2774	32.2149	32.2321		34.6459	5	34.5204	34.4795	34.5504		34.5796	4	34.4977	34.3745	34.4206		35.3019	4	34.9426	35.0496	35.0666		35.1164	5	35.6096	35.4703	35.4453		36.1714	4	36.3596	36.1698	36.1859		36.119	4
35.6292	4	35.7086	35.5684	35.5989		36.4099	4	36.5051	36.3864	36.4226		32.4031	5	32.2736	32.2111	32.2289		34.6444	5	34.5133	34.4721	34.5443		34.5804	4	34.4992	34.3745	34.4211		35.3066	4	34.9482	35.0594	35.0759		35.1013	5	35.5968	35.4565	35.4312		36.1684	4	36.3608	36.1691	36.1852		36.1228	4
35.6493	4	35.7102	35.5685	35.5993		36.4333	4	36.507	36.3871	36.4236		32.4043	5	32.2698	32.2073	32.2258		34.6403	4	34.5216	34.4811	34.5526		34.5771	4	34.5007	34.3746	34.4216		35.3116	4	34.9538	35.069	35.0852		35.0832	5	35.584	35.4428	35.4173		36.1624	4	36.362	36.1685	36.1845		36.1282	4
35.6649	4	35.7119	35.5687	35.5997		36.4456	4	36.509	36.3878	36.4247		32.3991	5	32.2661	32.2036	32.2227		34.6336	4	34.5299	34.4899	34.5609		34.5704	4	34.5022	34.3746	34.4221		35.3147	4	34.9594	35.0786	35.0943		35.0691	5	35.5714	35.4293	35.4035		36.1522	4	36.3632	36.1678	36.1839		36.1303	4
35.6736	4	35.7135	35.5688	35.6001		36.4509	4	36.5109	36.3885	36.4257		32.3983	6	32.2726	32.2115	32.2292		34.5603	4	34.5381	34.4988	34.5691		34.5625	4	34.5037	34.3746	34.4225		35.3175	4	34.965	35.088	35.1033		35.0574	5	35.5588	35.4158	35.3898		36.1415	4	36.3644	36.1672	36.1832		36.1351	4
35.678	4	35.7151	35.569	35.6005		36.4503	4	36.5127	36.3893	36.4267		32.3963	6	32.2792	32.2195	32.2357		34.6177	4	34.5463	34.5075	34.5773		34.5463	4	34.5052	34.3746	34.423		35.3171	4	34.9705	35.0973	35.1123		35.0468	5	35.5463	35.4024	35.3762		36.1283	4	36.3656	36.1665	36.1825		36.1376	4
35.6731	4	35.7167	35.5691	35.6008		36.4552	4	36.5146	36.39	36.4276		32.4115	6	32.2857	32.2273	32.2422		34.5664	4	34.5545	34.5163	34.5854		34.535	4	34.5066	34.3746	34.4235		35.3122	4	34.9761	35.1065	35.1211		35.0394	5	35.5338	35.3892	35.3627		36.1197	4	36.3668	36.1659	36.1818		36.141	4
35.6547	4	35.7184	35.5692	35.6012		36.4566	4	36.5165	36.3907	36.4286		32.4365	4	32.2922	32.2351	32.2486		34.5925	4	34.5627	34.525	34.5935		34.5396	4	34.5081	34.3746	34.424		35.3227	4	34.9816	35.1156	35.1299		35.0284	5	35.5215	35.376	35.3493		36.1085	4	36.368	36.1653	36.1811		36.1481	4
35.6481	4	35.72	35.5694	35.6016		36.451	4	36.5184	36.3914	36.4296		32.4304	4	32.2986	32.2429	32.255		34.5763	4	34.5708	34.5336	34.6015		34.5531	4	34.5095	34.3746	34.4244		35.3382	4	34.9871	35.1245	35.1385		35.0163	5	35.5092	35.3629	35.3361		36.1112	4	36.3692	36.1647	36.1804		36.1486	4
35.6531	4	35.7216	35.5695	35.6019		36.4403	4	36.5203	36.3921	36.4306		32.4299	4	32.3051	32.2506	32.2614		34.5944	4	34.5789	34.5422	34.6095		34.568	4	34.511	34.3746	34.4249		35.3423	4	34.9926	35.1334	35.147		35.005	5	35.4971	35.35	35.3229		36.1211	4	36.3704	36.1641	36.1797		36.1465	4
35.632	4	35.7232	35.5696	35.6023		36.4327	4	36.5221	36.3928	36.4316		32.4385	4	32.3115	32.2583	32.2677		34.5911	4	34.587	34.5508	34.6175		34.5692	4	34.5124	34.3746	34.4253		35.3399	4	34.9981	35.1421	35.1555		34.9956	5	35.485	35.3371	35.3098		36.1288	4	36.3716	36.1635	36.1791		36.1381	4
35.6113	4	35.7248	35.5697	35.6026		36.423	4	36.524	36.3936	36.4326		32.4416	4	32.3179	32.266	32.274		34.5888	4	34.595	34.5593	34.6254		34.5595	4	34.5139	34.3746	34.4257		35.3108	5	34.9937	35.1348	35.1483		34.9869	5	35.4729	35.3243	35.2969		36.1315	4	36.3728	36.1628	36.1784		36.1333	4
35.6078	4	35.7264	35.5699	35.603		36.4187	4	36.5258	36.3943	36.4335		32.4597	4	32.3243	32.2735	32.2803		34.5898	4	34.603	34.5678	34.6333		34.5461	4	34.5153	34.3746	34.4262		35.2848	5	34.9894	35.1276	35.1411		34.9789	5	35.461	35.3116	35.284		36.1312	4	36.374	36.1623	36.1777		36.1305	4
35.6027	4	35.7279	35.57	35.6033		36.4109	4	36.5277	36.395	36.4345		32.4646	4	32.3306	32.2811	32.2865		34.5818	4	34.611	34.5762	34.6411		34.5474	4	34.5167	34.3745	34.4266		35.2566	5	34.985	35.1203	35.1339		34.9748	5	35.4491	35.2991	35.2713		36.1368	4	36.3751	36.1617	36.177		36.1303	4
35.5967	4	35.7295	35.5701	35.6036		36.3986	4	36.5295	36.3957	36.4355		32.4531	4	32.337	32.2886	32.2927		34.5931	4	34.6189	34.5846	34.6489		34.5617	4	34.5181	34.3745	34.427		35.2147	5	34.9807	35.1131	35.1268		34.9705	5	35.4373	35.2866	35.2586		36.1438	4	36.3763	36.1611	36.1763		36.1284	4
35.5874	4	35.7311	35.5702	35.604		36.3914	4	36.5314	36.3964	36.4364		32.4406	4	32.3433	32.296	32.2988		34.5903	4	34.6268	34.5929	34.6567		34.5815	4	34.5195	34.3745	34.4275		35.1769	5	34.9764	35.1059	35.1197		34.9682	5	35.4256	35.2742	35.2461		36.1495	4	36.3775	36.1605	36.1757		36.1268	4
35.5695	4	35.7327	35.5703	35.6043		36.3944	4	36.5332	36.3971	36.4374		32.4454	4	32.3496	32.3034	32.305		34.5596	4	34.6347	34.6012	34.6644		34.5824	4	34.521	34.3745	34.4279		35.1468	5	34.972	35.0988	35.1127		34.9636	5	35.414	35.2619	35.2336		36.1608	4	36.3786	36.1599	36.175		36.1232	4
35.5714	4	35.7342	35.5705	35.6046		36.4058	4	36.535	36.3978	36.4384		32.4485	4	32.3559	32.3108	32.3111		34.614	4	34.6425	34.6094	34.6721		34.5769	4	34.5224	34.3745	34.4283		35.1279	5	34.9677	35.0916	35.1057		34.9556	5	35.4025	35.2496	35.2213		36.1759	4	36.3798	36.1593	36.1743		36.1205	4
35.5709	4	35.7358	35.5706	35.6049		36.4158	4	36.5368	36.3985	36.4393		32.4585	4	32.3621	32.3181	32.3171		34.5643	5	34.6346	34.6009	34.6648		34.5677	4	34.5238	34.3745	34.4287		35.1056	5	34.9634	35.0845	35.0987		34.9464	5	35.391	35.2375	35.209		36.1835	4	36.3809	36.1587	36.1736		36.1173	4
35.5633	4	35.7373	35.5707	35.6053		36.4212	4	36.5386	36.3992	36.4403		32.4742	4	32.3683	32.3253	32.3232		34.56	5	34.6267	34.5925	34.6576		34.5674	4	34.5252	34.3745	34.429		35.0837	5	34.9591	35.0773	35.0918		34.9376	5	35.3796	35.2255	35.1968		36.187	4	36.3821	36.1581	36.173		36.1147	4
35.5612	4	35.7389	35.5708	35.6056		36.4301	4	36.5404	36.3999	36.4412		32.4969	4	32.3746	32.3326	32.3292		34.599	5	34.6189	34.5842	34.6505		34.577	4	34.5265	34.3745	34.4294		35.0561	5	34.9548	35.0702	35.085		34.9326	5	35.3683	35.2135	35.1848		36.1923	4	36.3832	36.1576	36.1723		36.1132	4
35.5669	4	35.7404	35.5709	35.6059		36.4386	4	36.5422	36.4006	36.4421		32.5133	4	32.3807	32.3397	32.3351		34.5986	5	34.6111	34.5759	34.6435		34.5929	4	34.5279	34.3745	34.4298		35.0364	5	34.9505	35.0631	35.0781		34.9318	5	35.357	35.2017	35.1728		36.1967	4	36.3844	36.157	36.1716		36.1114	4
35.5788	4	35.7419	35.571	35.6062		36.4433	4	36.544	36.4013	36.4431		32.5205	4	32.3869	32.3469	32.3411		34.5916	5	34.6034	34.5676	34.6365		34.6007	4	34.5293	34.3746	34.4302		35.019	5	34.9462	35.056	35.0713		34.9252	5	35.3458	35.1899	35.1609		36.201	4	36.3855	36.1564	36.171		36.1128	4
35.5903	4	35.7435	35.5711	35.6065		36.4482	4	36.5458	36.402	36.444		32.5098	4	32.3931	32.354	32.347		34.584	5	34.5958	34.5595	34.6296		34.6095	4	34.5307	34.3746	34.4305		35.003	5	34.9419	35.049	35.0646		34.9163	5	35.3347	35.1782	35.1491		36.2046	4	36.3867	36.1559	36.1703		36.1175	4
35.6002	4	35.745	35.5712	35.6068		36.4503	4	36.5476	36.4027	36.445		32.5204	4	32.3992	32.361	32.3529		34.5612	5	34.5882	34.5514	34.6227		34.6311	4	34.5321	34.3746	34.4309		34.9865	5	34.9376	35.0419	35.0579		34.9002	5	35.3237	35.1666	35.1374		36.2073	4	36.3878	36.1553	36.1697		36.1169	4
35.5958	4	35.7465	35.5713	35.6071		36.4446	4	36.5494	36.4034	36.4459		32.5476	4	32.4053	32.368	32.3587		34.549	5	34.5806	34.5434	34.616		34.6355	4	34.5334	34.3746	34.4312		34.9765	5	34.9334	35.0349	35.0512		34.8978	5	35.3127	35.1551	35.1259		36.2148	4	36.3889	36.1547	36.169		36.1196	4
35.5982	4	35.748	35.5714	35.6073		36.4385	4	36.5512	36.4041	36.4468		32.5554	4	32.4114	32.375	32.3645		34.5467	5	34.5731	34.5355	34.6093		34.6379	4	34.5348	34.3746	34.4316		34.9706	5	34.9291	35.0279	35.0446		34.8969	5	35.3019	35.1437	35.1143		36.2214	4	36.3901	36.1542	36.1683		36.1265	4
35.5951	4	35.7495	35.5715	35.6076		36.4344	4	36.5529	36.4048	36.4477		32.5483	4	32.4174	32.3819	32.3703		34.5409	5	34.5657	34.5276	34.6026		34.6456	4	34.5361	34.3747	34.4319		34.9616	5	34.9248	35.0209	35.038		34.8896	5	35.291	35.1323	35.1029		36.2304	4	36.3912	36.1536	36.1677		36.1313	4
35.5857	4	35.7511	35.5716	35.6079		36.4318	4	36.5547	36.4054	36.4487		32.539	4	32.4235	32.3887	32.3761		34.5249	5	34.5583	34.5198	34.596		34.6525	4	34.5375	34.3747	34.4322		34.9537	5	34.9206	35.0139	35.0314		34.8809	5	35.2803	35.1211	35.0916		36.2321	4	36.3923	36.1531	36.167		36.1428	4
35.583	4	35.7526	35.5717	35.6082		36.4239	4	36.5564	36.4061	36.4496		32.5277	4	32.4295	32.3956	32.3818		34.5239	5	34.551	34.512	34.5895		34.6539	4	34.5388	34.3747	34.4325		34.9459	5	34.9163	35.0069	35.0249		34.8772	5	35.2696	35.1099	35.0804		36.2376	4	36.3934	36.1525	36.1664		36.1465	4
35.5839	4	35.754	35.5718	35.6084		36.4282	4	36.5582	36.4068	36.4505		32.5335	4	32.4355	32.4023	32.3875		34.5208	5	34.5437	34.5043	34.5831		34.6461	4	34.5402	34.3747	34.4328		34.9382	5	34.9121	35	35.0184		34.8732	5	35.259	35.0988	35.0692		36.2338	4	36.3946	36.152	36.1657		36.1487	4
35.5769	4	35.7555	35.5718	35.6087		36.4297	4	36.5599	36.4075	36.4514		32.5444	4	32.4415	32.4091	32.3932		34.5108	5	34.5364	34.4967	34.5767		34.6447	4	34.5415	34.3748	34.4331		34.9249	5	34.9078	34.9931	35.012		34.8689	5	35.2485	35.0878	35.0582		36.2195	4	36.3957	36.1514	36.1651		36.1482	4
35.5643	4	35.757	35.5719	35.609		36.4233	4	36.5617	36.4081	36.4523		32.5459	4	32.4475	32.4158	32.3989		34.517	5	34.5292	34.4892	34.5704		34.6558	4	34.5428	34.3748	34.4334		34.9167	5	34.9036	34.9862	35.0056		34.8639	5	35.238	35.0769	35.0472		36.2093	4	36.3968	36.1509	36.1645		36.1449	4
35.547	4	35.7585	35.572	35.6092		36.4096	4	36.5634	36.4088	36.4532		32.5507	4	32.4534	32.4224	32.4045		34.5148	5	34.5221	34.4817	34.5642		34.655	4	34.5442	34.3748	34.4337		34.9027	5	34.8994	34.9793	34.9993		34.8597	5	35.2276	35.066	35.0363		36.2014	4	36.3979	36.1503	36.1638		36.1454	4
35.5505	4	35.76	35.5721	35.6095		36.392	4	36.5651	36.4095	36.4541		32.5536	4	32.4593	32.4291	32.4101		34.5118	5	34.515	34.4743	34.558		34.6504	4	34.5455	34.3749	34.434		34.8862	5	34.8952	34.9724	34.9929		34.8523	5	35.2173	35.0552	35.0255		36.1904	4	36.399	36.1498	36.1632		36.1451	4
35.5581	4	35.7614	35.5722	35.6097		36.3863	4	36.5669	36.4101	36.455		32.5589	4	32.4652	32.4356	32.4157		34.503	5	34.508	34.4669	34.5518		34.6324	4	34.5468	34.3749	34.4343		34.8759	5	34.8909	34.9655	34.9867		34.8445	5	35.2071	35.0446	35.0148		36.172	4	36.4001	36.1492	36.1626		36.1444	4
35.5545	4	35.7629	35.5723	35.61		36.3786	4	36.5686	36.4108	36.4559		32.5586	4	32.4711	32.4422	32.4212		34.5017	5	34.501	34.4596	34.5458		34.6268	4	34.5481	34.375	34.4345		34.876	5	34.8867	34.9587	34.9804		34.8411	5	35.1969	35.0339	35.0042		36.1535	4	36.4012	36.1487	36.162		36.1475	4
35.5545	4	35.7644	35.5723	35.6102		36.3666	4	36.5703	36.4114	36.4568		32.5693	4	32.477	32.4487	32.4268		34.4902	5	34.494	34.4524	34.5398		34.6243	4	34.5494	34.375	34.4348		34.8763	5	34.8825	34.9518	34.9742		34.8341	5	35.1867	35.0234	34.9936		36.1321	4	36.4023	36.1481	36.1614		36.1552	4
35.5563	4	35.7658	35.5724	35.6104		36.3606	4	36.572	36.4121	36.4577		32.5826	4	32.4828	32.4551	32.4323		34.5007	5	34.4871	34.4452	34.5338		34.6105	4	34.5507	34.375	34.435		34.8709	5	34.8783	34.945	34.9681		34.8278	5	35.1767	35.013	34.9832		36.1203	4	36.4034	36.1476	36.1608		36.1588	4
35.563	4	35.7673	35.5725	35.6107		36.3614	4	36.5737	36.4128	36.4586		32.5856	4	32.4886	32.4615	32.4377		34.4994	5	34.4803	34.4381	34.5279		34.6088	4	34.552	34.3751	34.4353		34.871	5	34.8741	34.9382	34.9619		34.8209	5	35.1667	35.0026	34.9728		36.1266	4	36.4045	36.1471	36.1601		36.1691	4
35.5732	4	35.7687	35.5726	35.6109		36.3588	4	36.5754	36.4134	36.4595		32.5934	4	32.4944	32.4679	32.4432		34.5066	5	34.4735	34.431	34.5221		34.6015	4	34.5533	34.3751	34.4355		34.8651	5	34.87	34.9315	34.9558		34.8109	5	35.1568	34.9923	34.9625		36.1313	4	36.4055	36.1465	36.1595		36.1744	4
35.5588	4	35.7701	35.5726	35.6112		36.3392	4	36.5771	36.4141	36.4604		32.6018	4	32.5002	32.4742	32.4486		34.5169	4	34.4819	34.4401	34.5305		34.5904	4	34.5546	34.3752	34.4358		34.8574	5	34.8658	34.9247	34.9498		34.7961	5	35.1469	34.9821	34.9523		36.1376	4	36.4066	36.146	36.1589		36.1704	4
35.5496	4	35.7716	35.5727	35.6114		36.3194	4	36.5788	36.4147	36.4613		32.614	4	32.506	32.4805	32.454		34.4993	5	34.4751	34.433	34.5247		34.5803	4	34.5559	34.3752	34.436		34.8516	5	34.8616	34.918	34.9438		34.7831	5	35.1371	34.9719	34.9422		36.1459	4	36.4077	36.1455	36.1583		36.1637	4
35.5613	4	35.773	35.5727	35.6116		36.3102	4	36.5804	36.4154	36.4621		32.6228	4	32.5117	32.4868	32.4593		34.4896	5	34.4683	34.426	34.5189		34.5783	4	34.5571	34.3753	34.4363		34.8466	5	34.8574	34.9112	34.9378		34.7723	5	35.1274	34.9618	34.9321		36.1485	4	36.4088	36.1449	36.1577		36.1549	4
35.5784	4	35.7744	35.5728	35.6119		36.3033	4	36.5821	36.416	36.463		32.6236	4	32.5174	32.493	32.4647		34.4924	5	34.4616	34.419	34.5131		34.5833	4	34.5584	34.3753	34.4365		34.8378	5	34.8533	34.9045	34.9318		34.7671	5	35.1177	34.9518	34.9221		36.1505	4	36.4098	36.1444	36.1571		36.1472	4
35.5933	4	35.7759	35.5729	35.6121		36.2965	4	36.5838	36.4167	36.4639		32.6242	4	32.5231	32.4992	32.47		34.4859	5	34.4549	34.4121	34.5075		34.6067	4	34.5597	34.3754	34.4367		34.8211	5	34.8491	34.8978	34.9259		34.7592	5	35.1081	34.9419	34.9122		36.1566	4	36.4109	36.1439	36.1565		36.1411	4
35.61	4	35.7773	35.5729	35.6123		36.2939	4	36.5855	36.4174	36.4648		32.619	4	32.5288	32.5054	32.4752		34.4799	5	34.4483	34.4053	34.5018		34.6282	4	34.5609	34.3755	34.437		34.8136	5	34.845	34.8911	34.9201		34.7549	5	35.0986	34.9321	34.9024		36.1544	4	36.412	36.1433	36.1559		36.1415	4
35.6294	4	35.7787	35.573	35.6126		36.2922	4	36.5871	36.418	36.4656		32.6175	4	32.5345	32.5115	32.4805		34.472	5	34.4417	34.3985	34.4963		34.6452	4	34.5622	34.3755	34.4372		34.8034	5	34.8408	34.8845	34.9142		34.7494	5	35.0891	34.9223	34.8927		36.1523	4	36.413	36.1428	36.1554		36.1405	4
35.6412	4	35.7801	35.573	35.6128		36.2971	4	36.5888	36.4187	36.4665		32.6147	4	32.5401	32.5175	32.4857		34.4677	5	34.4352	34.3918	34.4908		34.658	4	34.5634	34.3756	34.4374		34.7999	5	34.8367	34.8778	34.9084		34.7461	5	35.0797	34.9126	34.883		36.15	4	36.4141	36.1423	36.1548		36.1411	4
35.6544	4	35.7815	35.5731	35.613		36.3001	4	36.5904	36.4193	36.4673		32.6098	4	32.5458	32.5236	32.4909		34.4835	5	34.4287	34.3851	34.4853		34.6675	4	34.5647	34.3756	34.4377		34.7947	5	34.8325	34.8712	34.9027		34.7437	5	35.0704	34.9029	34.8734		36.1464	4	36.4152	36.1417	36.1542		36.1494	4
35.6665	4	35.7829	35.5731	35.6132		36.3019	4	36.5921	36.4199	36.4682		32.608	4	32.5514	32.5296	32.4961		34.4026	5	34.4223	34.3785	34.4799		34.6792	4	34.5659	34.3757	34.4379		34.7898	5	34.8284	34.8646	34.8969		34.7378	5	35.0611	34.8934	34.8639		36.1473	4	36.4162	36.1412	36.1536		36.1674	4
35.6684	4	35.7843	35.5731	35.6134		36.3028	4	36.5937	36.4206	36.4691		32.6079	4	32.557	32.5355	32.5013		34.4917	4	34.4309	34.3879	34.4885		34.6753	4	34.5672	34.3758	34.4381		34.7913	5	34.8243	34.858	34.8912		34.7344	5	35.0519	34.8839	34.8545		36.1434	4	36.4173	36.1407	36.153		36.1773	4
35.6781	4	35.7857	35.5732	35.6136		36.3011	4	36.5953	36.4212	36.4699		32.6025	4	32.5625	32.5415	32.5064		34.4583	4	34.4395	34.3972	34.4971		34.6741	4	34.5684	34.3758	34.4383		34.7974	5	34.8202	34.8514	34.8856		34.7324	5	35.0427	34.8744	34.8451		36.1398	4	36.4183	36.1402	36.1524		36.1809	4
35.6588	4	35.787	35.5732	35.6138		36.2983	4	36.597	36.4219	36.4708		32.6083	4	32.5681	32.5474	32.5115		34.485	4	34.4481	34.4065	34.5056		34.6725	4	34.5696	34.3759	34.4385		34.8017	6	34.8262	34.8644	34.8965		34.7267	5	35.0336	34.8651	34.8358		36.1324	4	36.4193	36.1396	36.1518		36.1846	4
35.6341	4	35.7884	35.5732	35.614		36.3019	4	36.5986	36.4225	36.4716		32.6171	4	32.5736	32.5532	32.5166		34.4781	4	34.4567	34.4157	34.5141		34.6565	4	34.5709	34.376	34.4386		34.8139	6	34.8322	34.8773	34.9073		34.7212	5	35.0245	34.8558	34.8266		36.1241	4	36.4204	36.1391	36.1512		36.1899	4
35.6126	4	35.7898	35.5732	35.6142		36.3123	4	36.6002	36.4232	36.4725		32.618	4	32.5791	32.559	32.5216		34.4824	4	34.4652	34.4249	34.5225		34.6332	4	34.5721	34.3761	34.4388		34.8422	6	34.8381	34.8899	34.918		34.718	6	35.0303	34.8617	34.8329		36.1225	4	36.4214	36.1386	36.1507		36.2028	4
35.5889	4	35.7911	35.5733	35.6144		36.328	4	36.6018	36.4238	36.4733		32.6188	4	32.5846	32.5648	32.5266		34.4951	4	34.4737	34.4341	34.5309		34.6091	4	34.5733	34.3761	34.439		34.8948	6	34.8441	34.9024	34.9286		34.7177	6	35.036	34.8677	34.8391		36.113	4	36.4225	36.1381	36.1501		36.2203	4
35.5698	4	35.7925	35.5733	35.6146		36.3449	4	36.6034	36.4244	36.4742		32.6208	4	32.5901	32.5705	32.5316		34.5144	4	34.4822	34.4432	34.5392		34.5844	4	34.5745	34.3762	34.4392		34.9605	6	34.85	34.9147	34.939		34.7234	6	35.0417	34.8735	34.8453		36.1113	4	36.4235	36.1376	36.1495		36.2336	4
35.5722	4	35.7939	35.5733	35.6148		36.3605	4	36.605	36.425	36.475		32.6271	4	32.5955	32.5762	32.5366		34.5118	4	34.4906	34.4522	34.5475		34.5635	4	34.5757	34.3763	34.4393		35.0063	6	34.8559	34.9268	34.9494		34.7286	6	35.0474	34.8794	34.8515		36.1066	4	36.4245	36.137	36.1489		36.2396	4
35.5928	4	35.7952	35.5733	35.615		36.3753	4	36.6066	36.4257	36.4759		32.6262	4	32.601	32.5819	32.5415		34.5195	5	34.4838	34.445	34.5415		34.5358	4	34.5769	34.3764	34.4395		35.0663	6	34.8618	34.9388	34.9597		34.7339	6	35.0531	34.8851	34.8576		36.097	4	36.4255	36.1365	36.1483		36.244	4
35.6266	4	35.7966	35.5733	35.6151		36.3852	4	36.6082	36.4263	36.4767		32.6364	4	32.6064	32.5875	32.5464		34.5172	5	34.4769	34.4379	34.5355		34.5031	4	34.5781	34.3765	34.4396		35.128	4	34.8677	34.9506	34.9698		34.7488	6	35.0587	34.8909	34.8637		36.0887	4	36.4266	36.136	36.1477		36.2421	4
35.6555	4	35.7979	35.5733	35.6153		36.3869	4	36.6098	36.4269	36.4776		32.6606	4	32.6118	32.5931	32.5514		34.5167	5	34.4701	34.4308	34.5296		34.4715	4	34.5793	34.3765	34.4398		35.1334	4	34.8735	34.9622	34.9799		34.7711	6	35.0644	34.8966	34.8697		36.0819	4	36.4276	36.1355	36.1471		36.2307	4
35.6776	4	35.7993	35.5733	35.6155		36.3863	4	36.6114	36.4275	36.4784		32.6814	4	32.6172	32.5987	32.5562		34.5286	5	34.4634	34.4238	34.5238		34.4494	4	34.5805	34.3766	34.4399		35.114	4	34.8794	34.9737	34.9898		34.7973	6	35.07	34.9023	34.8757		36.0751	4	36.4286	36.135	36.1466		36.2239	4
35.6919	4	35.8006	35.5733	35.6157		36.3882	4	36.613	36.4282	36.4793		32.7002	4	32.6226	32.6042	32.5611		34.52	5	34.4567	34.4168	34.518		34.4353	4	34.5817	34.3767	34.44		35.0905	4	34.8852	34.985	34.9997		34.8173	6	35.0756	34.9079	34.8816		36.0679	4	36.4296	36.1344	36.146		36.2321	4
35.7063	4	35.8019	35.5733	35.6159		36.3966	4	36.6145	36.4288	36.4801		32.7136	4	32.6279	32.6097	32.5659		34.511	5	34.4501	34.41	34.5123		34.4337	4	34.5829	34.3767	34.4401		35.0627	4	34.891	34.9961	35.0094		34.8375	6	35.0811	34.9135	34.8875		36.0609	4	36.4306	36.1339	36.1454		36.2387	4
35.7198	4	35.8032	35.5733	35.616		36.3927	4	36.6161	36.4294	36.481		32.7244	4	32.6332	32.6152	32.5707		34.5038	5	34.4435	34.4031	34.5066		34.4259	4	34.584	34.3768	34.4403		35.0414	4	34.8968	35.0071	35.0191		34.8515	6	35.0866	34.9191	34.8934		36.0494	4	36.4316	36.1334	36.1448		36.2353	4
35.7198	4	35.8046	35.5733	35.6162		36.3915	4	36.6177	36.43	36.4818		32.7215	4	32.6385	32.6206	32.5755		34.4991	5	34.4369	34.3963	34.501		34.4085	4	34.5852	34.3769	34.4404		35.0184	4	34.9025	35.018	35.0286		34.8587	6	35.0922	34.9246	34.8992		36.0457	4	36.4326	36.1329	36.1443		36.2271	4
35.7178	4	35.8059	35.5732	35.6164		36.3856	4	36.6192	36.4307	36.4827		32.7157	4	32.6438	32.626	32.5803		34.5026	5	34.4304	34.3896	34.4954		34.3933	4	34.5864	34.3769	34.4405		35.0019	4	34.9083	35.0286	35.038		34.8782	6	35.0977	34.9301	34.905		36.0479	4	36.4336	36.1323	36.1437		36.215	4
35.7251	4	35.8072	35.5732	35.6166		36.3713	4	36.6208	36.4313	36.4835		32.7105	4	32.6491	32.6314	32.5851		34.5018	5	34.424	34.3829	34.4899		34.3933	4	34.5875	34.377	34.4406		34.9906	5	34.9041	35.0217	35.0314		34.8966	6	35.1031	34.9355	34.9108		36.0483	4	36.4346	36.1318	36.1432		36.2011	4
35.7391	4	35.8085	35.5732	35.6168		36.369	4	36.6223	36.4319	36.4844		32.7066	4	32.6544	32.6367	32.5898		34.4999	5	34.4176	34.3763	34.4844		34.405	4	34.5887	34.377	34.4407		34.9744	5	34.8998	35.0147	35.0248		34.9145	6	35.1086	34.9409	34.9165		36.0374	4	36.4356	36.1313	36.1426		36.1936	4
35.7457	4	35.8098	35.5732	35.6169		36.36	4	36.6239	36.4325	36.4852		32.7054	4	32.6596	32.6421	32.5945		34.4805	5	34.4112	34.3697	34.4791		34.4165	4	34.5899	34.3771	34.4408		34.9642	5	34.8956	35.0078	35.0182		34.9393	6	35.114	34.9463	34.9222		36.0226	4	36.4366	36.1308	36.1421		36.1945	4
35.7438	4	35.8111	35.5732	35.6171		36.3419	4	36.6254	36.4331	36.4861		32.7024	4	32.6648	32.6473	32.5992		34.4866	5	34.4049	34.3632	34.4737		34.4298	4	34.591	34.3771	34.4408		34.9542	5	34.8914	35.0009	35.0117		34.9575	6	35.1194	34.9516	34.9278		35.9987	4	36.4376	36.1302	36.1415		36.2022	4
35.7358	4	35.8124	35.5731	35.6173		36.3295	4	36.6269	36.4337	36.4869		32.6981	4	32.67	32.6526	32.6038		34.4703	5	34.3986	34.3568	34.4685		34.4358	4	34.5922	34.3772	34.4409		34.953	5	34.8872	34.994	35.0052		34.9807	6	35.1248	34.9569	34.9334		35.9722	4	36.4386	36.1297	36.141		36.2158	4
35.7229	4	35.8137	35.5731	35.6175		36.3251	4	36.6285	36.4344	36.4877		32.6972	4	32.6752	32.6578	32.6085		34.4794	5	34.3923	34.3504	34.4633		34.4527	4	34.5933	34.3772	34.441		34.9664	5	34.883	34.9871	34.9988		34.9977	6	35.1302	34.9622	34.939		35.9493	4	36.4396	36.1292	36.1405		36.2338	4
35.711	4	35.815	35.5731	35.6176		36.3207	4	36.63	36.435	36.4886		32.6982	4	32.6804	32.663	32.6131		34.4625	5	34.3861	34.3441	34.4581		34.4771	4	34.5944	34.3772	34.441		34.9679	4	34.8888	34.9982	35.0085		35.0106	6	35.1355	34.9674	34.9445		35.9294	4	36.4405	36.1286	36.14		36.2449	4
35.6921	4	35.8163	35.5731	35.6178		36.3219	4	36.6315	36.4356	36.4894		32.6996	4	32.6855	32.6682	32.6177		34.4716	5	34.38	34.3378	34.453		34.4871	4	34.5956	34.3773	34.4411		34.9566	5	34.8846	34.9913	35.002		35.0135	6	35.1408	34.9726	34.95		35.9187	4	36.4415	36.1281	36.1395		36.246	4
35.6794	4	35.8175	35.573	35.618		36.3289	4	36.633	36.4362	36.4903		32.6995	4	32.6907	32.6733	32.6223		34.4785	5	34.3739	34.3315	34.4479		34.5046	4	34.5967	34.3773	34.4412		34.9427	5	34.8804	34.9844	34.9956		35.0186	6	35.1461	34.9778	34.9555		35.9116	4	36.4425	36.1276	36.139		36.2514	4
35.6479	4	35.8188	35.573	35.6182		36.3349	4	36.6345	36.4368	36.4911		32.7005	4	32.6958	32.6784	32.6269		34.4836	5	34.3678	34.3254	34.4429		34.527	4	34.5978	34.3774	34.4412		34.9321	5	34.8762	34.9775	34.9892		35.0117	6	35.1514	34.9829	34.9609		35.9057	4	36.4435	36.127	36.1385		36.2613	4
35.626	4	35.8201	35.573	35.6183		36.3508	4	36.636	36.4374	36.4919		32.7171	4	32.7009	32.6835	32.6314		34.4831	5	34.3618	34.3192	34.438		34.5514	4	34.5989	34.3774	34.4412		34.9356	5	34.872	34.9707	34.9828		35.0035	6	35.1567	34.988	34.9663		35.8936	4	36.4444	36.1265	36.138		36.2747	4
35.6134	4	35.8213	35.573	35.6185		36.352	4	36.6375	36.438	36.4928		32.7331	4	32.706	32.6885	32.6359		34.4757	5	34.3558	34.3132	34.4331		34.5644	4	34.6001	34.3774	34.4413		34.9365	5	34.8678	34.9638	34.9765		34.9972	6	35.1619	34.993	34.9716		35.8918	4	36.4454	36.1259	36.1375		36.2908	4
35.617	4	35.8226	35.573	35.6187		36.3425	4	36.639	36.4386	36.4936		32.7289	4	32.711	32.6935	32.6404		34.4766	5	34.3498	34.3071	34.4283		34.5766	4	34.6012	34.3774	34.4413		34.9438	5	34.8636	34.957	34.9702		34.9918	6	35.1672	34.998	34.9769		35.8873	4	36.4464	36.1254	36.137		36.3089	4
35.6261	4	35.8239	35.5729	35.6189		36.3403	4	36.6405	36.4393	36.4944		32.7323	4	32.7161	32.6985	32.6449		34.48	5	34.3439	34.3012	34.4235		34.593	4	34.6023	34.3775	34.4413		34.9524	5	34.8595	34.9502	34.964		34.9897	6	35.1724	35.003	34.9822		35.8851	4	36.4473	36.1249	36.1365		36.325	4
35.6308	4	35.8251	35.5729	35.6191		36.3279	4	36.642	36.4399	36.4952		32.7422	4	32.7211	32.7034	32.6494		34.4798	5	34.3381	34.2952	34.4188		34.6087	4	34.6034	34.3775	34.4414		34.9524	5	34.8553	34.9434	34.9578		34.9948	4	35.1775	35.0079	34.9875		35.8864	4	36.4483	36.1243	36.136		36.3379	4
35.6264	4	35.8263	35.5729	35.6192		36.3058	4	36.6435	36.4405	36.4961		32.7653	4	32.7261	32.7084	32.6538		34.4795	4	34.3471	34.305	34.4277		34.6112	4	34.6045	34.3775	34.4414		34.9523	5	34.8511	34.9366	34.9517		34.9974	4	35.1827	35.0129	34.9927		35.8866	4	36.4492	36.1238	36.1356		36.3333	4
35.6226	4	35.8276	35.5729	35.6194		36.2879	4	36.645	36.4411	36.4969		32.7844	4	32.7311	32.7133	32.6582		34.4867	4	34.356	34.3147	34.4366		34.6205	4	34.6056	34.3775	34.4414		34.9485	5	34.847	34.9298	34.9456		34.973	4	35.1879	35.0177	34.9978		35.8947	4	36.4502	36.1232	36.1351		36.3279	4
35.6285	4	35.8288	35.5729	35.6196		36.2841	4	36.6465	36.4417	36.4977		32.8014	4	32.7361	32.7181	32.6626		34.476	4	34.3649	34.3244	34.4455		34.6225	4	34.6067	34.3775	34.4414		34.9432	5	34.8428	34.9231	34.9395		34.9339	5	35.1778	35.0072	34.9873		35.909	4	36.4511	36.1227	36.1347		36.3306	4
35.6436	4	35.8301	35.5729	35.6198		36.2791	4	36.6479	36.4423	36.4985		32.8174	4	32.7411	32.723	32.667		34.4705	4	34.3738	34.3341	34.4543		34.6172	4	34.6078	34.3775	34.4414		34.9449	5	34.8387	34.9163	34.9335		34.8908	5	35.1678	34.9967	34.9769		35.9293	4	36.4521	36.1222	36.1342		36.331	4
35.6463	4	35.8313	35.5728	35.6199		36.2731	4	36.6494	36.4429	36.4993		32.8356	4	32.746	32.7278	32.6714		34.4559	4	34.3827	34.3437	34.463		34.6149	4	34.6088	34.3775	34.4414		34.9477	5	34.8346	34.9096	34.9275		34.8545	5	35.1579	34.9863	34.9666		35.9358	4	36.453	36.1216	36.1338		36.325	4
35.6508	4	35.8325	35.5728	35.6201		36.2803	4	36.6508	36.4435	36.5001		32.8421	4	32.7509	32.7326	32.6757		34.4552	5	34.3765	34.3374	34.4579		34.6171	4	34.6099	34.3775	34.4414		34.9498	5	34.8304	34.9029	34.9215		34.8209	5	35.148	34.976	34.9564		35.9363	4	36.454	36.1211	36.1333		36.3239	4
35.6581	4	35.8337	35.5728	35.6203		36.2925	4	36.6523	36.4441	36.5009		32.8353	4	32.7558	32.7373	32.68		34.4474	5	34.3704	34.3311	34.4528		34.6309	4	34.611	34.3775	34.4414		34.9401	5	34.8263	34.8962	34.9156		34.7908	5	35.1382	34.9657	34.9462		35.927	4	36.4549	36.1205	36.1329		36.3249	4
35.6744	4	35.835	35.5729	35.6204		36.3071	4	36.6537	36.4447	36.5017		32.8553	4	32.7607	32.7421	32.6843		34.4439	5	34.3644	34.3249	34.4478		34.6455	4	34.6121	34.3775	34.4414		34.9301	5	34.8222	34.8895	34.9097		34.7627	5	35.1285	34.9556	34.9362		35.9153	4	36.4558	36.12	36.1325		36.3173	4
35.6993	4	35.8362	35.5729	35.6206		36.3161	4	36.6552	36.4453	36.5024		32.8686	4	32.7656	32.7468	32.6886		34.4422	5	34.3584	34.3188	34.4429		34.6551	4	34.6131	34.3775	34.4414		34.9209	5	34.8181	34.8828	34.9039		34.7353	5	35.1188	34.9455	34.9262		35.9113	4	36.4568	36.1195	36.132		36.2915	4
35.7123	4	35.8374	35.5729	35.6208		36.3313	4	36.6566	36.4458	36.5032		32.8808	4	32.7705	32.7514	32.6929		34.437	5	34.3524	34.3127	34.438		34.6611	4	34.6142	34.3775	34.4413		34.922	5	34.8139	34.8761	34.8981		34.7124	5	35.1092	34.9354	34.9163		35.9204	4	36.4577	36.1189	36.1316		36.2902	4
35.7267	4	35.8386	35.5729	35.6209		36.3517	4	36.6581	36.4464	36.504		32.8938	4	32.7753	32.7561	32.6971		34.4454	5	34.3465	34.3066	34.4331		34.6683	4	34.6153	34.3775	34.4413		34.9259	5	34.8098	34.8695	34.8924		34.6916	5	35.0996	34.9255	34.9064		35.9284	4	36.4586	36.1184	36.1312		36.2895	4
35.7282	4	35.8398	35.5729	35.6211		36.3563	4	36.6595	36.447	36.5048		32.8969	4	32.7802	32.7607	32.7013		34.4439	5	34.3406	34.3007	34.4283		34.6819	4	34.6163	34.3775	34.4413		34.9351	5	34.8057	34.8629	34.8866		34.6719	5	35.0902	34.9156	34.8967		35.9443	4	36.4595	36.1178	36.1308		36.2839	4
35.7215	4	35.841	35.5729	35.6212		36.3533	4	36.6609	36.4476	36.5056		32.8942	4	32.785	32.7653	32.7055		34.4501	5	34.3348	34.2947	34.4236		34.6885	4	34.6174	34.3775	34.4412		34.9425	5	34.8017	34.8563	34.8809		34.6528	5	35.0807	34.9058	34.887		35.9586	4	36.4605	36.1173	36.1304		36.2864	4
35.7215	4	35.8422	35.5729	35.6214		36.3462	4	36.6624	36.4482	36.5064		32.8911	4	32.7898	32.7699	32.7096		34.4547	5	34.329	34.2888	34.4189		34.6951	4	34.6184	34.3775	34.4412		34.9404	6	34.8077	34.8691	34.8918		34.6365	5	35.0714	34.8961	34.8774		35.9578	4	36.4614	36.1168	36.13		36.2992	4
35.7361	4	35.8434	35.5729	35.6216		36.3466	4	36.6638	36.4488	36.5072		32.8922	4	32.7945	32.7744	32.7138		34.3967	5	34.3232	34.283	34.4142		34.7031	4	34.6195	34.3774	34.4411		34.9373	6	34.8138	34.8817	34.9026		34.6231	5	35.0621	34.8864	34.8678		35.9535	4	36.4623	36.1162	36.1296		36.314	4
35.7484	4	35.8445	35.573	35.6217		36.3456	4	36.6652	36.4494	36.5079		32.8986	4	32.7993	32.7789	32.7179		34.4271	5	34.3175	34.2772	34.4096		34.7078	4	34.6205	34.3774	34.4411		34.9431	6	34.8198	34.8942	34.9133		34.6111	5	35.0529	34.8768	34.8584		35.9527	4	36.4632	36.1157	36.1292		36.3195	4
35.7459	4	35.8457	35.573	35.6219		36.3492	4	36.6666	36.45	36.5087		32.9015	4	32.8041	32.7834	32.722		34.4116	4	34.3266	34.2871	34.4186		34.7199	4	34.6215	34.3774	34.441		34.9738	6	34.8258	34.9065	34.9238		34.5896	5	35.0437	34.8673	34.849		35.9433	4	36.4641	36.1151	36.1288		36.3377	4
35.7298	4	35.8469	35.573	35.622		36.3548	4	36.668	36.4506	36.5095		32.9034	4	32.8088	32.7879	32.7261		34.352	5	34.3208	34.2813	34.414		34.7227	4	34.6226	34.3774	34.4409		35.0335	6	34.8318	34.9186	34.9343		34.5731	5	35.0346	34.8579	34.8397		35.9327	4	36.465	36.1146	36.1284		36.3531	4
35.7274	4	35.8481	35.5731	35.6221		36.3425	4	36.6694	36.4511	36.5103		32.9094	4	32.8135	32.7923	32.7302		34.3958	5	34.3151	34.2755	34.4094		34.7177	4	34.6236	34.3774	34.4409		35.1019	6	34.8377	34.9305	34.9446		34.5597	5	35.0255	34.8485	34.8305		35.9196	4	36.4659	36.114	36.128		36.357	4
35.7096	4	35.8492	35.5731	35.6223		36.3278	4	36.6708	36.4517	36.5111		32.9186	4	32.8182	32.7967	32.7343		34.4036	5	34.3095	34.2697	34.4049		34.7189	4	34.6246	34.3773	34.4408		35.1774	6	34.8437	34.9422	34.9548		34.5503	5	35.0165	34.8392	34.8213		35.9097	4	36.4668	36.1135	36.1277		36.3654	4
35.6908	4	35.8504	35.5732	35.6224		36.3285	4	36.6722	36.4523	36.5118		32.9429	4	32.8229	32.8011	32.7383		34.3658	5	34.3038	34.264	34.4004		34.7272	4	34.6257	34.3773	34.4407		35.2407	6	34.8496	34.9538	34.9649		34.5401	5	35.0076	34.83	34.8122		35.9057	4	36.4677	36.1129	36.1273		36.3692	4
35.6798	4	35.8516	35.5732	35.6226		36.3226	4	36.6736	36.4529	36.5126		32.9425	4	32.8276	32.8055	32.7423		34.3415	5	34.2983	34.2584	34.396		34.7364	4	34.6267	34.3773	34.4406		35.3004	6	34.8555	34.9652	34.9748		34.533	5	34.9987	34.8208	34.8032		35.9004	4	36.4686	36.1124	36.1269		36.3629	4
35.6876	4	35.8527	35.5733	35.6227		36.3177	4	36.675	36.4535	36.5134		32.9271	4	32.8322	32.8098	32.7463		34.392	5	34.2927	34.2528	34.3916		34.739	4	34.6277	34.3772	34.4405		35.3403	6	34.8614	34.9764	34.9847		34.5228	5	34.9899	34.8117	34.7943		35.895	4	36.4695	36.1118	36.1265		36.3615	4
35.6892	4	35.8539	35.5733	35.6228		36.3141	4	36.6763	36.4541	36.5141		32.9085	5	32.8257	32.8016	32.7363		34.4248	5	34.2872	34.2472	34.3873		34.7426	4	34.6287	34.3772	34.4405		35.3765	6	34.8673	34.9874	34.9944		34.5144	5	34.9811	34.8026	34.7854		35.902	4	36.4704	36.1113	36.1262		36.3668	4
35.6839	4	35.855	35.5734	35.623		36.312	4	36.6777	36.4546	36.5149		32.8856	5	32.8193	32.7934	32.7264		34.4322	5	34.2817	34.2417	34.383		34.7414	4	34.6297	34.3771	34.4404		35.4153	6	34.8731	34.9983	35.0041		34.5085	5	34.9724	34.7937	34.7766		35.9151	4	36.4713	36.1107	36.1258		36.3687	4
35.6807	4	35.8562	35.5734	35.6231		36.3177	4	36.6791	36.4552	36.5157		32.8669	4	32.8239	32.7978	32.7305		34.3838	5	34.2763	34.2363	34.3787		34.7476	4	34.6307	34.3771	34.4403		35.4478	6	34.879	35.009	35.0136		34.497	5	34.9638	34.7848	34.7678		35.9209	4	36.4722	36.1102	36.1254		36.3702	4
35.6789	4	35.8573	35.5735	35.6232		36.3273	4	36.6804	36.4558	36.5164		32.8623	5	32.8175	32.7897	32.7207		34.4461	5	34.2709	34.2309	34.3745		34.738	4	34.6317	34.377	34.4401		35.473	6	34.8848	35.0196	35.023		34.484	5	34.9552	34.7759	34.7592		35.9263	4	36.4731	36.1096	36.125		36.3706	4
35.7039	4	35.8585	35.5735	35.6233		36.3397	4	36.6818	36.4564	36.5172		32.8507	5	32.8111	32.7817	32.711		34.4031	5	34.2655	34.2255	34.3703		34.7483	4	34.6327	34.377	34.44		35.4911	6	34.8906	35.0299	35.0323		34.4706	5	34.9467	34.7671	34.7506		35.9271	4	36.4739	36.1091	36.1247		36.3717	4
35.7138	4	35.8596	35.5736	35.6235		36.3463	4	36.6832	36.4569	36.5179		32.8385	4	32.8158	32.7862	32.7152		34.4263	5	34.2602	34.2202	34.3662		34.7633	4	34.6337	34.3769	34.4399		35.4967	6	34.8964	35.0402	35.0416		34.4594	5	34.9382	34.7584	34.7421		35.9108	4	36.4748	36.1085	36.1243		36.3808	4
35.7066	4	35.8607	35.5737	35.6236		36.3576	4	36.6845	36.4575	36.5187		32.8105	5	32.8094	32.7782	32.7057		34.431	6	34.2695	34.2303	34.3754		34.7736	4	34.6347	34.3769	34.4398		35.4957	6	34.9022	35.0503	35.0507		34.4485	5	34.9298	34.7498	34.7336		35.8868	4	36.4757	36.108	36.1239		36.3818	4
35.693	4	35.8618	35.5737	35.6237		36.3707	4	36.6859	36.4581	36.5195		32.7963	5	32.803	32.7703	32.6963		34.3772	6	34.2788	34.2404	34.3846		34.7899	4	34.6357	34.3768	34.4397		35.5093	6	34.9079	35.0602	35.0597		34.4394	5	34.9214	34.7412	34.7252		35.861	4	36.4766	36.1074	36.1235		36.3732	4
35.6853	4	35.863	35.5738	35.6238		36.3788	4	36.6872	36.4587	36.5202		32.7844	5	32.7966	32.7624	32.687		34.4584	6	34.288	34.2504	34.3937		34.7831	4	34.6366	34.3768	34.4395		35.516	6	34.9136	35.07	35.0686		34.4308	5	34.9131	34.7327	34.7169		35.8346	4	36.4774	36.1069	36.1232		36.3551	4
35.6962	4	35.8641	35.5739	35.624		36.3876	4	36.6885	36.4593	36.5209		32.7675	5	32.7903	32.7546	32.6778		34.4986	6	34.2971	34.2604	34.4028		34.7884	4	34.6376	34.3767	34.4394		35.5094	6	34.9194	35.0796	35.0775		34.422	5	34.9049	34.7242	34.7086		35.8133	4	36.4783	36.1063	36.1228		36.3243	4
35.7088	4	35.8652	35.574	35.6241		36.3937	4	36.6899	36.4598	36.5217		32.7571	5	32.784	32.7468	32.6688		34.5498	6	34.3063	34.2704	34.4118		34.7957	4	34.6386	34.3766	34.4393		35.5051	6	34.9251	35.0891	35.0862		34.4078	5	34.8967	34.7159	34.7004		35.7932	4	36.4792	36.1057	36.1224		36.3025	4
35.7103	4	35.8663	35.574	35.6242		36.406	4	36.6912	36.4604	36.5224		32.7522	5	32.7778	32.7392	32.66		34.5829	6	34.3154	34.2803	34.4208		34.7975	4	34.6396	34.3766	34.4391		35.5081	6	34.9307	35.0984	35.0949		34.3958	5	34.8885	34.7075	34.6923		35.7784	4	36.48	36.1052	36.1221		36.2921	4
35.7193	4	35.8674	35.5741	35.6243		36.4093	4	36.6925	36.461	36.5232		32.7426	5	32.7715	32.7315	32.6512		34.6651	6	34.3245	34.2901	34.4298		34.7856	4	34.6405	34.3765	34.439		35.5101	6	34.9364	35.1077	35.1034		34.3872	5	34.8805	34.6993	34.6842		35.7651	4	36.4809	36.1046	36.1217		36.2863	4
35.7135	4	35.8685	35.5742	35.6244		36.4076	4	36.6939	36.4615	36.5239		32.7324	5	32.7653	32.724	32.6426		34.6798	6	34.3335	34.2999	34.4386		34.7727	4	34.6415	34.3764	34.4388		35.523	6	34.942	35.1167	35.1119		34.3787	5	34.8724	34.6911	34.6762		35.748	4	36.4818	36.1041	36.1213		36.2993	4
35.698	4	35.8696	35.5743	35.6245		36.4038	4	36.6952	36.4621	36.5246		32.7304	4	32.7702	32.7289	32.6472		34.7059	6	34.3425	34.3096	34.4475		34.7653	4	34.6425	34.3764	34.4387		35.5353	6	34.9477	35.1257	35.1203		34.3731	5	34.8644	34.683	34.6683		35.7138	4	36.4826	36.1035	36.121		36.3058	4
35.6865	4	35.8707	35.5744	35.6246		36.3956	4	36.6965	36.4627	36.5253		32.7282	5	32.764	32.7213	32.6386		34.7116	6	34.3515	34.3193	34.4563		34.7645	4	34.6434	34.3763	34.4385		35.542	6	34.9533	35.1346	35.1286		34.3661	5	34.8565	34.6749	34.6604		35.6964	4	36.4835	36.103	36.1206		36.3141	4
35.6883	4	35.8718	35.5745	35.6247		36.3941	4	36.6978	36.4632	36.5261		32.7161	5	32.7578	32.7138	32.6302		34.722	6	34.3604	34.3289	34.4651		34.7609	4	34.6444	34.3763	34.4384		35.5503	6	34.9589	35.1433	35.1368		34.3597	5	34.8486	34.6669	34.6526		35.688	4	36.4843	36.1024	36.1203		36.3222	4
35.6873	4	35.8729	35.5746	35.6248		36.3949	4	36.6991	36.4638	36.5268		32.71	5	32.7517	32.7064	32.6219		34.7196	6	34.3693	34.3385	34.4738		34.7676	4	34.6453	34.3762	34.4382		35.5573	6	34.9645	35.1519	35.1449		34.3549	5	34.8408	34.6589	34.6448		35.689	4	36.4852	36.1019	36.1199		36.3377	4
35.6896	4	35.874	35.5747	35.6249		36.3911	4	36.7004	36.4644	36.5275		32.7008	5	32.7456	32.699	32.6138		34.747	6	34.3782	34.348	34.4824		34.7657	4	34.6463	34.3761	34.438		35.5521	6	34.97	35.1603	35.1529		34.3502	5	34.833	34.651	34.6372		35.6948	4	36.486	36.1013	36.1195		36.3484	4
35.7071	4	35.875	35.5748	35.625		36.376	4	36.7017	36.4649	36.5282		32.6947	5	32.7395	32.6917	32.6057		34.7912	6	34.387	34.3575	34.491		34.7539	4	34.6472	34.3761	34.4379		35.5549	6	34.9756	35.1687	35.1609		34.3448	5	34.8253	34.6432	34.6295		35.6991	4	36.4868	36.1008	36.1192		36.3502	4
35.7249	4	35.8761	35.5749	35.6251		36.3572	4	36.703	36.4655	36.5289		32.6944	5	32.7335	32.6845	32.5978		34.7998	6	34.3958	34.3669	34.4996		34.7492	4	34.6481	34.376	34.4377		35.5661	6	34.9811	35.1769	35.1687		34.342	5	34.8176	34.6354	34.622		35.701	4	36.4877	36.1002	36.1188		36.3277	4
35.7358	4	35.8772	35.575	35.6252		36.3428	4	36.7043	36.4661	36.5296		32.6945	5	32.7275	32.6773	32.59		34.8025	6	34.4046	34.3763	34.5081		34.7503	4	34.6491	34.3759	34.4375		35.5744	6	34.9866	35.1849	35.1765		34.3341	5	34.81	34.6277	34.6144		35.7004	4	36.4885	36.0997	36.1184		36.2969	4
35.7487	4	35.8783	35.5751	35.6253		36.334	4	36.7056	36.4666	36.5303		32.6881	5	32.7215	32.6701	32.5823		34.8019	6	34.4133	34.3856	34.5165		34.7527	4	34.65	34.3758	34.4373		35.5867	6	34.9921	35.1929	35.1842		34.3279	5	34.8024	34.62	34.607		35.699	4	36.4894	36.0992	36.1181		36.267	4
35.764	4	35.8793	35.5752	35.6254		36.3258	4	36.7069	36.4672	36.531		32.6805	4	32.7265	32.6754	32.5872		34.8005	6	34.422	34.3948	34.525		34.7617	4	34.6509	34.3758	34.4371		35.582	4	34.9976	35.2008	35.1918		34.3182	5	34.7949	34.6124	34.5996		35.7035	4	36.4902	36.0987	36.1177		36.25	4
35.7796	4	35.8804	35.5753	35.6255		36.3256	4	36.7082	36.4677	36.5318		32.678	5	32.7205	32.6683	32.5796		34.8068	6	34.4307	34.4041	34.5333		34.7723	4	34.6518	34.3757	34.4369		35.5475	4	35.003	35.2085	35.1993		34.3073	5	34.7874	34.6048	34.5922		35.6915	4	36.491	36.0981	36.1173		36.2497	4
35.7918	4	35.8815	35.5754	35.6256		36.3275	4	36.7094	36.4683	36.5325		32.6609	5	32.7146	32.6612	32.5721		34.8129	6	34.4393	34.4132	34.5417		34.7822	4	34.6528	34.3756	34.4367		35.4983	4	35.0085	35.2161	35.2068		34.2979	5	34.78	34.5973	34.585		35.6833	4	36.4918	36.0976	36.117		36.2428	4
35.8037	4	35.8825	35.5755	35.6257		36.3312	4	36.7107	36.4688	36.5332		32.6484	4	32.7196	32.6665	32.577		34.8162	6	34.4479	34.4224	34.5499		34.7773	4	34.6537	34.3755	34.4365		35.4508	4	35.0139	35.2236	35.2142		34.2899	5	34.7726	34.5899	34.5777		35.687	4	36.4927	36.0971	36.1166		36.2346	4
35.8131	4	35.8836	35.5757	35.6258		36.3335	4	36.712	36.4693	36.5339		32.654	4	32.7246	32.6717	32.5819		34.8473	6	34.4565	34.4314	34.5582		34.7702	4	34.6546	34.3754	34.4363		35.4054	4	35.0193	35.231	35.2215		34.2863	5	34.7653	34.5825	34.5705		35.6898	4	36.4935	36.0966	36.1162		36.2392	4
35.8212	4	35.8846	35.5758	35.6258		36.3371	4	36.7132	36.4699	36.5346		32.6676	4	32.7296	32.6769	32.5868		34.8167	4	34.465	34.4405	34.5663		34.768	4	34.6555	34.3754	34.4361		35.3608	4	35.0247	35.2383	35.2287		34.2843	5	34.758	34.5751	34.5634		35.6862	4	36.4943	36.0961	36.1158		36.2461	4
35.8223	4	35.8856	35.5759	35.6259		36.3423	4	36.7145	36.4704	36.5353		32.6932	4	32.7346	32.6821	32.5917		34.7999	4	34.4735	34.4495	34.5745		34.7725	4	34.6564	34.3753	34.4359		35.3246	4	35.0301	35.2455	35.2359		34.2829	5	34.7508	34.5678	34.5563		35.6863	4	36.4951	36.0956	36.1155		36.2634	4
35.8281	4	35.8867	35.576	35.626		36.3425	4	36.7157	36.4709	36.536		32.7282	4	32.7396	32.6873	32.5966		34.7736	4	34.482	34.4584	34.5826		34.7788	4	34.6573	34.3752	34.4356		35.2898	4	35.0354	35.2525	35.2429		34.273	5	34.7436	34.5606	34.5493		35.6859	4	36.4959	36.0951	36.1151		36.3034	4
35.835	4	35.8877	35.5761	35.6261		36.3472	4	36.717	36.4715	36.5366		32.7639	4	32.7445	32.6924	32.6014		34.7898	4	34.4904	34.4673	34.5906		34.7966	4	34.6582	34.3751	34.4354		35.2617	4	35.0408	35.2595	35.2499		34.2634	5	34.7365	34.5534	34.5424		35.6817	4	36.4968	36.0946	36.1147		36.3498	4
35.8313	4	35.8888	35.5762	35.6262		36.3532	4	36.7182	36.472	36.5373		32.7814	4	32.7495	32.6974	32.6063		34.7547	5	34.4835	34.4598	34.5841		34.8006	4	34.6591	34.375	34.4352		35.2365	5	35.0364	35.252	35.2418		34.2533	5	34.7294	34.5463	34.5354		35.6857	4	36.4976	36.0941	36.1144		36.3838	4
35.8273	4	35.8898	35.5763	35.6262		36.3531	4	36.7195	36.4725	36.538		32.7771	5	32.7434	32.6901	32.5984		34.722	5	34.4767	34.4524	34.5776		34.8086	4	34.66	34.3749	34.4349		35.2115	5	35.0319	35.2445	35.2337		34.2473	5	34.7224	34.5392	34.5286		35.6888	4	36.4984	36.0936	36.114		36.4101	4
35.8311	4	35.8908	35.5763	35.6263		36.3487	4	36.7207	36.473	36.5387		32.7522	5	32.7373	32.6828	32.5907		34.637	5	34.4699	34.4451	34.5711		34.8128	4	34.6609	34.3748	34.4347		35.2002	5	35.0275	35.237	35.2257		34.2443	5	34.7154	34.5322	34.5218		35.6863	4	36.4992	36.0932	36.1136		36.421	4
35.8405	4	35.8918	35.5764	35.6264		36.3536	4	36.722	36.4735	36.5394		32.7252	5	32.7313	32.6756	32.5831		34.6696	4	34.4784	34.4541	34.5792		34.8223	4	34.6618	34.3747	34.4344		35.1883	5	35.0232	35.2295	35.2177		34.241	5	34.7084	34.5252	34.515		35.6888	4	36.5	36.0927	36.1132		36.4027	4
35.8479	4	35.8929	35.5765	35.6264		36.3532	4	36.7232	36.474	36.5401		32.6996	5	32.7253	32.6684	32.5757		34.5982	5	34.4716	34.4467	34.5728		34.824	4	34.6627	34.3746	34.4342		35.1827	5	35.0188	35.222	35.2098		34.2338	5	34.7015	34.5183	34.5083		35.6876	4	36.5008	36.0922	36.1129		36.3876	4
35.8613	4	35.8939	35.5766	35.6265		36.3494	4	36.7244	36.4745	36.5408		32.6853	5	32.7193	32.6613	32.5683		34.6293	4	34.4801	34.4556	34.5808		34.8273	4	34.6636	34.3745	34.4339		35.1747	5	35.0144	35.2145	35.2019		34.2254	5	34.6947	34.5114	34.5016		35.6954	4	36.5016	36.0917	36.1125		36.367	4
35.868	4	35.8949	35.5767	35.6265		36.3539	4	36.7256	36.475	36.5414		32.672	5	32.7134	32.6542	32.561		34.6084	5	34.4733	34.4483	34.5744		34.8288	4	34.6644	34.3744	34.4337		35.1683	5	35.01	35.2071	35.1941		34.2174	5	34.6878	34.5046	34.495		35.7091	4	36.5024	36.0912	36.1121		36.3411	4
35.8816	4	35.8959	35.5768	35.6266		36.3578	4	36.7269	36.4755	36.5421		32.6628	5	32.7075	32.6472	32.5538		34.5584	5	34.4665	34.441	34.5679		34.8243	4	34.6653	34.3743	34.4334		35.1612	5	35.0056	35.1996	35.1863		34.2055	5	34.6811	34.4978	34.4885		35.7183	4	36.5032	36.0908	36.1118		36.3369	4
35.8792	4	35.8969	35.5769	35.6266		36.3539	4	36.7281	36.476	36.5428		32.6505	5	32.7016	32.6402	32.5467		34.582	5	34.4598	34.4337	34.5616		34.8215	4	34.6662	34.3742	34.4331		35.1591	5	35.0013	35.1922	35.1786		34.198	5	34.6744	34.4911	34.482		35.6993	5	36.495	36.0792	36.099		36.338	4
35.8667	4	35.8979	35.5769	35.6267		36.3502	4	36.7293	36.4765	36.5434		32.6303	5	32.6957	32.6333	32.5398		34.5761	4	34.4683	34.4427	34.5697		34.8188	4	34.667	34.374	34.4329		35.1462	4	35.0067	35.2	35.1863		34.1951	5	34.6677	34.4844	34.4755		35.6745	5	36.4869	36.0678	36.0864		36.3379	4
35.8537	4	35.8989	35.577	35.6267		36.3478	4	36.7305	36.477	36.5441		32.6182	5	32.6899	32.6264	32.5329		34.5674	5	34.4616	34.4354	34.5634		34.8164	4	34.6679	34.3739	34.4326		35.1315	5	35.0023	35.1926	35.1785		34.1909	5	34.661	34.4777	34.4691		35.6374	5	36.4788	36.0564	36.0738		36.3405	4
35.8472	4	35.8999	35.5771	35.6267		36.3631	4	36.7317	36.4775	36.5448		32.6085	5	32.6841	32.6196	32.5262		34.5634	5	34.4549	34.4282	34.5571		34.8191	4	34.6688	34.3738	34.4323		35.1313	5	34.998	35.1852	35.1709		34.1855	5	34.6545	34.4712	34.4627		35.6025	5	36.4708	36.0451	36.0613		36.3447	4
35.8419	4	35.9009	35.5772	35.6268		36.3777	4	36.7329	36.478	36.5454		32.6025	5	32.6783	32.6128	32.5196		34.5558	5	34.4483	34.4211	34.5508		34.8259	4	34.6696	34.3737	34.432		35.1335	5	34.9936	35.1778	35.1632		34.1842	5	34.6479	34.4646	34.4564		35.5716	5	36.4627	36.0338	36.0489		36.3482	4
35.8415	4	35.9019	35.5772	35.6268		36.3888	4	36.7341	36.4785	36.5461		32.5971	5	32.6726	32.6061	32.513		34.5573	5	34.4417	34.414	34.5446		34.8291	4	34.6705	34.3736	34.4318		35.1334	5	34.9893	35.1705	35.1556		34.1772	5	34.6414	34.4581	34.4501		35.5514	4	36.4636	36.0337	36.049		36.3509	4
35.8435	4	35.9029	35.5773	35.6268		36.4028	4	36.7353	36.479	36.5468		32.5887	5	32.6669	32.5995	32.5066		34.5599	4	34.4503	34.4231	34.5529		34.8202	4	34.6713	34.3735	34.4315		35.1444	5	34.9849	35.1631	35.1481		34.175	5	34.6349	34.4517	34.4439		35.5235	5	36.4556	36.0225	36.0367		36.3596	4
35.8442	4	35.9038	35.5774	35.6269		36.4187	4	36.7365	36.4794	36.5474		32.5826	5	32.6612	32.5928	32.5002		34.5505	5	34.4437	34.416	34.5467		34.8124	4	34.6722	34.3733	34.4312		35.1512	5	34.9806	35.1558	35.1406		34.1741	5	34.6285	34.4453	34.4377		35.4868	5	36.4476	36.0113	36.0244		36.3601	4
35.8463	4	35.9048	35.5774	35.6269		36.4305	4	36.7377	36.4799	36.5481		32.5813	5	32.6555	32.5863	32.494		34.5419	5	34.4372	34.409	34.5405		34.8018	4	34.673	34.3732	34.4309		35.1588	5	34.9763	35.1485	35.1332		34.1702	5	34.6221	34.4389	34.4316		35.4705	5	36.4396	36.0003	36.0123		36.3575	4
35.8506	4	35.9058	35.5775	35.6269		36.4464	4	36.7389	36.4804	36.5487		32.5825	5	32.6499	32.5798	32.4879		34.5343	5	34.4306	34.402	34.5344		34.7936	4	34.6739	34.3731	34.4307		35.1633	5	34.9719	35.1412	35.1258		34.1697	5	34.6158	34.4326	34.4255		35.4596	5	36.4316	35.9892	36.0002		36.3662	4
35.8635	4	35.9068	35.5776	35.6269		36.4564	4	36.74	36.4809	36.5494		32.5791	5	32.6443	32.5733	32.4818		34.5376	4	34.4393	34.4111	34.5427		34.7887	4	34.6747	34.373	34.4304		35.1659	5	34.9676	35.1339	35.1184		34.1633	5	34.6095	34.4264	34.4194		35.4481	4	36.4326	35.9895	36.0006		36.3668	4
35.8377	4	35.9077	35.5776	35.627		36.4631	4	36.7412	36.4813	36.55		32.5729	5	32.6387	32.5669	32.4759		34.5332	5	34.4328	34.4041	34.5366		34.7849	4	34.6755	34.3728	34.4301		35.1675	5	34.9633	35.1266	35.1111		34.1474	5	34.6033	34.4202	34.4134		35.4291	5	36.4247	35.9785	35.9886		36.3661	4
35.7928	4	35.9087	35.5777	35.627		36.4631	4	36.7424	36.4818	36.5507		32.5633	5	32.6331	32.5605	32.47		34.5262	5	34.4263	34.3971	34.5305		34.7789	4	34.6764	34.3727	34.4298		35.1651	5	34.959	35.1194	35.1039		34.1369	5	34.5971	34.414	34.4075		35.4041	5	36.4167	35.9676	35.9766		36.3573	4
35.7686	4	35.9097	35.5777	35.627		36.4573	4	36.7435	36.4823	36.5513		32.5639	5	32.6276	32.5542	32.4643		34.5223	4	34.4349	34.4063	34.5388		34.775	4	34.6772	34.3726	34.4295		35.1591	5	34.9547	35.1121	35.0967		34.128	5	34.5909	34.4079	34.4015		35.3934	5	36.4088	35.9568	35.9648		36.3669	4
35.7456	4	35.9106	35.5778	35.627		36.4465	4	36.7447	36.4827	36.552		32.5641	5	32.6221	32.5479	32.4586		34.5132	4	34.4435	34.4154	34.547		34.7783	4	34.678	34.3724	34.4292		35.1551	5	34.9504	35.1049	35.0895		34.1247	5	34.5848	34.4018	34.3957		35.3843	5	36.4009	35.946	35.953		36.3773	4
35.7098	4	35.9116	35.5778	35.627		36.422	4	36.7459	36.4832	36.5526		32.5538	5	32.6166	32.5417	32.453		34.5046	4	34.4521	34.4245	34.5552		34.7806	4	34.6789	34.3723	34.4289		35.1536	5	34.9461	35.0977	35.0824		34.1175	5	34.5787	34.3958	34.3898		35.3717	4	36.402	35.9465	35.9537		36.3895	4
35.7062	4	35.9125	35.5779	35.627		36.3691	4	36.747	36.4836	36.5533		32.5437	5	32.6112	32.5355	32.4475		34.4967	5	34.4455	34.4174	34.5489		34.7806	4	34.6797	34.3722	34.4286		35.1455	5	34.9418	35.0905	35.0754		34.1173	5	34.5726	34.3898	34.3841		35.3464	4	36.4031	35.947	35.9543		36.3866	4
35.6921	4	35.9135	35.5779	35.627		36.3108	4	36.7482	36.4841	36.5539		32.5343	5	32.6058	32.5293	32.4421		34.4916	5	34.4389	34.4103	34.5427		34.7801	4	34.6805	34.372	34.4283		35.1436	5	34.9375	35.0833	35.0684		34.116	5	34.5666	34.3838	34.3783		35.3198	5	36.3952	35.9363	35.9426		36.3753	4
35.6878	4	35.9144	35.578	35.627		36.2649	4	36.7493	36.4845	36.5546		32.5246	5	32.6004	32.5232	32.4367		34.4882	5	34.4324	34.4033	34.5365		34.7801	4	34.6813	34.3719	34.428		35.1322	5	34.9333	35.0761	35.0614		34.1135	5	34.5607	34.3779	34.3726		35.3138	5	36.3874	35.9256	35.931		36.3703	4
35.6937	4	35.9154	35.5781	35.6271		36.2233	4	36.7505	36.485	36.5552		32.5219	5	32.595	32.5172	32.4315		34.4879	5	34.426	34.3963	34.5304		34.778	4	34.6821	34.3718	34.4277		35.1187	4	34.9389	35.0855	35.0703		34.1131	5	34.5547	34.372	34.367		35.3095	5	36.3796	35.915	35.9194		36.3597	4
35.6985	4	35.9163	35.5781	35.6271		36.2083	4	36.7516	36.4854	36.5558		32.5157	4	32.6005	32.5233	32.4373		34.4953	5	34.4195	34.3894	34.5243		34.7778	4	34.6829	34.3716	34.4273		35.106	5	34.9346	35.0783	35.0633		34.1156	5	34.5488	34.3662	34.3613		35.3079	5	36.3717	35.9044	35.908		36.3516	4
35.7127	4	35.9172	35.5782	35.6271		36.2205	4	36.7528	36.4858	36.5565		32.5018	5	32.5951	32.5172	32.432		34.4982	5	34.4131	34.3826	34.5183		34.7759	4	34.6837	34.3715	34.427		35.0842	5	34.9304	35.0711	35.0564		34.1146	5	34.543	34.3604	34.3558		35.3052	5	36.3639	35.8939	35.8966		36.3498	4
35.7391	4	35.9182	35.5782	35.6271		36.2405	4	36.7539	36.4863	36.5571		32.4798	5	32.5897	32.5112	32.4269		34.498	5	34.4068	34.3758	34.5124		34.7743	4	34.6845	34.3714	34.4267		35.0747	5	34.9261	35.064	35.0495		34.1088	5	34.5372	34.3547	34.3502		35.3024	5	36.3562	35.8835	35.8852		36.3485	4
35.7592	4	35.9191	35.5783	35.6271		36.2598	4	36.755	36.4867	36.5577		32.4756	5	32.5844	32.5052	32.4218		34.493	5	34.4005	34.369	34.5065		34.7756	4	34.6853	34.3712	34.4263		35.0702	5	34.9219	35.0569	35.0426		34.1017	5	34.5314	34.349	34.3447		35.2921	4	36.3574	35.8845	35.8863		36.3507	4
35.7722	4	35.92	35.5783	35.6271		36.2685	4	36.7561	36.4871	36.5584		32.4687	5	32.5791	32.4993	32.4168		34.4881	5	34.3943	34.3623	34.5007		34.7761	4	34.6861	34.3711	34.426		35.0705	5	34.9176	35.0497	35.0358		34.0968	5	34.5257	34.3433	34.3393		35.2691	4	36.3586	35.8854	35.8874		36.3456	4
35.7767	4	35.921	35.5784	35.6271		36.2611	4	36.7573	36.4876	36.559		32.4597	5	32.5739	32.4935	32.4119		34.4813	4	34.403	34.3717	34.5091		34.7697	4	34.6869	34.371	34.4257		35.0681	5	34.9134	35.0426	35.0291		34.0919	5	34.52	34.3377	34.3339		35.2523	5	36.3508	35.875	35.8761		36.3421	4
35.7729	4	35.9219	35.5785	35.6271		36.2563	4	36.7584	36.488	36.5596		32.4519	5	32.5686	32.4876	32.4071		34.4674	5	34.3968	34.365	34.5032		34.7673	4	34.6877	34.3709	34.4253		35.0772	5	34.9091	35.0356	35.0223		34.0865	5	34.5143	34.3321	34.3285		35.2464	5	36.3431	35.8647	35.8649		36.3299	4
35.7589	4	35.9228	35.5785	35.6271		36.2587	4	36.7595	36.4884	36.5602		32.449	5	32.5634	32.4818	32.4023		34.4538	5	34.3905	34.3583	34.4974		34.7657	4	34.6885	34.3708	34.425		35.0797	5	34.9049	35.0285	35.0157		34.0825	5	34.5087	34.3266	34.3231		35.235	5	36.3354	35.8544	35.8538		36.3279	4
35.7465	4	35.9237	35.5786	35.6271		36.2504	4	36.7606	36.4888	36.5609		32.4388	5	32.5582	32.4761	32.3977		34.4487	5	34.3843	34.3517	34.4917		34.7646	4	34.6893	34.3707	34.4246		35.0829	5	34.9007	35.0214	35.009		34.082	5	34.5031	34.3211	34.3179		35.2303	5	36.3277	35.8442	35.8427		36.3353	4
35.7471	4	35.9246	35.5786	35.6272		36.2182	4	36.7617	36.4892	36.5615		32.4183	5	32.5531	32.4704	32.3931		34.4429	5	34.3782	34.3452	34.486		34.7716	4	34.6901	34.3706	34.4242		35.0858	5	34.8964	35.0144	35.0024		34.0765	5	34.4975	34.3156	34.3126		35.2304	5	36.32	35.834	35.8317		36.3421	4
35.7587	4	35.9255	35.5787	35.6272		36.2103	4	36.7628	36.4896	36.5621		32.4085	5	32.5479	32.4648	32.3885		34.4364	5	34.3721	34.3387	34.4803		34.7701	4	34.6909	34.3705	34.4239		35.0911	5	34.8922	35.0074	34.9959		34.0664	5	34.492	34.3102	34.3074		35.225	5	36.3123	35.8239	35.8208		36.3551	4
35.7718	4	35.9264	35.5787	35.6272		36.2197	4	36.7639	36.49	36.5627		32.3991	5	32.5428	32.4592	32.3841		34.3823	5	34.366	34.3322	34.4747		34.7714	4	34.6916	34.3704	34.4235		35.084	5	34.888	35.0004	34.9894		34.0567	5	34.4866	34.3048	34.3022		35.2231	5	36.3047	35.8138	35.81		36.3677	4
35.7821	4	35.9273	35.5788	35.6272		36.224	4	36.765	36.4904	36.5634		32.3912	5	32.5377	32.4536	32.3797		34.3805	5	34.36	34.3258	34.4692		34.7786	4	34.6924	34.3703	34.4232		35.0786	5	34.8838	34.9934	34.983		34.052	5	34.4811	34.2995	34.297		35.2201	5	36.2971	35.8038	35.7992		36.3819	4
35.7844	4	35.9282	35.5788	35.6272		36.2159	4	36.7661	36.4907	36.564		32.3856	5	32.5327	32.4481	32.3754		34.4325	5	34.3541	34.3195	34.4637		34.7835	4	34.6932	34.3702	34.4228		35.0703	5	34.8796	34.9864	34.9766		34.0475	5	34.4757	34.2942	34.2919		35.2193	4	36.2985	35.8053	35.8009		36.3813	4
35.7919	4	35.9291	35.5789	35.6273		36.2107	4	36.7672	36.4911	36.5646		32.3795	5	32.5276	32.4426	32.3711		34.4332	5	34.3481	34.3132	34.4583		34.7856	4	34.6939	34.37	34.4224		35.0587	5	34.8754	34.9795	34.9702		34.0447	5	34.4703	34.2889	34.2869		35.199	5	36.2909	35.7954	35.7902		36.3759	4
35.8008	4	35.93	35.5789	35.6273		36.1924	4	36.7683	36.4914	36.5652		32.3782	5	32.5226	32.4372	32.367		34.384	5	34.3422	34.307	34.4529		34.7806	4	34.6947	34.3699	34.4221		35.0541	5	34.8712	34.9725	34.9639		34.0421	5	34.465	34.2836	34.2818		35.1823	5	36.2833	35.7855	35.7795		36.3716	4
35.8021	4	35.9309	35.579	35.6273		36.1764	4	36.7694	36.4918	36.5658		32.3769	5	32.5176	32.4318	32.3629		34.4334	4	34.3512	34.3166	34.4615		34.7819	4	34.6955	34.3698	34.4217		35.0538	5	34.867	34.9656	34.9576		34.0417	5	34.4597	34.2785	34.2768		35.1793	5	36.2757	35.7757	35.769		36.3601	4
35.8062	4	35.9318	35.579	35.6274		36.1695	4	36.7705	36.4921	36.5664		32.3745	5	32.5127	32.4264	32.3588		34.424	5	34.3453	34.3104	34.4561		34.7834	4	34.6962	34.3697	34.4213		35.0593	5	34.8629	34.9587	34.9514		34.0418	5	34.4544	34.2733	34.2719		35.1758	5	36.2681	35.7659	35.7585		36.3507	4
35.8125	4	35.9327	35.579	35.6274		36.1536	4	36.7716	36.4925	36.567		32.3687	5	32.5077	32.4211	32.3548		34.4099	5	34.3394	34.3042	34.4507		34.7915	4	34.697	34.3696	34.4209		35.0573	5	34.8587	34.9518	34.9452		34.04	5	34.4492	34.2682	34.267		35.1735	5	36.2606	35.7562	35.7481		36.3567	4
35.8264	4	35.9336	35.5791	35.6274		36.1591	4	36.7726	36.4928	36.5676		32.3669	5	32.5028	32.4158	32.3509		34.4013	5	34.3336	34.298	34.4454		34.7996	4	34.6977	34.3694	34.4205		35.063	5	34.8545	34.9449	34.9391		34.0291	5	34.444	34.2631	34.2621		35.1683	5	36.2531	35.7465	35.7377		36.3657	4
35.8168	4	35.9344	35.5791	35.6275		36.178	4	36.7737	36.4931	36.5682		32.3577	5	32.4979	32.4106	32.3471		34.3921	5	34.3278	34.2919	34.4401		34.8022	4	34.6985	34.3693	34.4201		35.072	5	34.8504	34.938	34.933		34.0233	5	34.4389	34.258	34.2572		35.1544	5	36.2456	35.7369	35.7274		36.3758	4
35.8244	4	35.9353	35.5792	35.6275		36.1981	4	36.7748	36.4934	36.5688		32.3362	4	32.5037	32.4174	32.3533		34.3926	5	34.322	34.2859	34.4349		34.8039	4	34.6992	34.3692	34.4198		35.0742	5	34.8462	34.9312	34.927		34.0125	5	34.4337	34.253	34.2524		35.1518	5	36.2381	35.7273	35.7172		36.3881	4
35.8077	4	35.9362	35.5792	35.6275		36.2071	4	36.7759	36.4937	36.5694		32.3257	5	32.4988	32.4122	32.3495		34.3921	5	34.3163	34.2799	34.4297		34.8076	4	34.7	34.3691	34.4194		35.0884	4	34.8521	34.9425	34.9373		34.0074	5	34.4286	34.248	34.2476		35.151	5	36.2307	35.7178	35.707		36.3889	4
35.7851	4	35.937	35.5792	35.6276		36.2187	4	36.7769	36.494	36.57		32.3133	5	32.4939	32.4069	32.3457		34.3876	4	34.3254	34.2896	34.4384		34.804	4	34.7007	34.3689	34.419		35.0968	4	34.858	34.9537	34.9476		34.0029	5	34.4236	34.2431	34.2429		35.1456	5	36.2232	35.7083	35.697		36.3932	4
35.7768	4	35.9379	35.5793	35.6276		36.2288	4	36.778	36.4943	36.5706		32.3091	5	32.4891	32.4018	32.3419		34.3798	4	34.3344	34.2993	34.4471		34.7996	4	34.7015	34.3688	34.4186		35.0871	5	34.8539	34.9468	34.9414		33.9986	5	34.4186	34.2382	34.2382		35.1369	5	36.2158	35.6989	35.6869		36.3872	4
35.774	4	35.9388	35.5793	35.6277		36.2404	4	36.779	36.4946	36.5712		32.3048	5	32.4842	32.3966	32.3382		34.3717	4	34.3434	34.309	34.4557		34.7934	4	34.7022	34.3687	34.4182		35.0804	5	34.8497	34.9399	34.9354		33.9966	5	34.4136	34.2333	34.2335		35.1286	5	36.2084	35.6896	35.677		36.3729	4
35.7744	4	35.9396	35.5793	35.6277		36.2554	4	36.7801	36.4948	36.5718		32.3006	5	32.4794	32.3916	32.3346		34.3821	4	34.3524	34.3186	34.4643		34.7924	4	34.7029	34.3686	34.4178		35.0778	5	34.8456	34.9331	34.9293		33.9937	5	34.4086	34.2285	34.2288		35.1312	5	36.2011	35.6803	35.6671		36.3498	4
35.7806	4	35.9405	35.5793	35.6278		36.2507	4	36.7811	36.4951	36.5724		32.299	5	32.4747	32.3865	32.331		34.383	4	34.3613	34.3281	34.4728		34.7917	4	34.7037	34.3685	34.4174		35.0738	4	34.8515	34.9443	34.9397		33.99	5	34.4037	34.2237	34.2242		35.1262	5	36.1937	35.6711	35.6573		36.3216	4
35.7821	4	35.9413	35.5794	35.6278		36.2466	4	36.7822	36.4954	36.573		32.3016	5	32.4699	32.3815	32.3275		34.3793	4	34.3702	34.3376	34.4813		34.787	4	34.7044	34.3684	34.417		35.0731	5	34.8473	34.9374	34.9336		33.9856	5	34.3988	34.2189	34.2196		35.1232	5	36.1864	35.6619	35.6475		36.308	4
35.7917	4	35.9422	35.5794	35.6279		36.2482	4	36.7832	36.4956	36.5736		32.309	5	32.4652	32.3765	32.3241		34.381	5	34.3642	34.3312	34.4756		34.7788	4	34.7051	34.3683	34.4166		35.0654	5	34.8432	34.9306	34.9276		33.9797	5	34.3939	34.2142	34.2151		35.1259	5	36.179	35.6528	35.6378		36.3151	4
35.7937	4	35.943	35.5794	35.6279		36.2561	4	36.7843	36.4958	36.5742		32.3094	5	32.4605	32.3715	32.3207		34.3886	5	34.3582	34.3248	34.47		34.779	4	34.7059	34.3682	34.4162		35.0645	5	34.839	34.9237	34.9216		33.9762	5	34.3891	34.2095	34.2106		35.1163	5	36.1717	35.6437	35.6282		36.3272	4
35.8001	4	35.9439	35.5795	35.628		36.2649	4	36.7853	36.4961	36.5748		32.3118	5	32.4558	32.3666	32.3173		34.3908	5	34.3522	34.3184	34.4644		34.7844	4	34.7066	34.3681	34.4158		35.0715	5	34.8349	34.9169	34.9157		33.9704	5	34.3843	34.2048	34.2061		35.1004	5	36.1644	35.6347	35.6186		36.3391	4
35.8053	4	35.9447	35.5795	35.628		36.269	4	36.7863	36.4963	36.5753		32.3105	5	32.4511	32.3617	32.3141		34.3859	5	34.3463	34.3121	34.4589		34.7837	4	34.7073	34.368	34.4155		35.0759	5	34.8308	34.91	34.9098		33.9692	5	34.3795	34.2002	34.2017		35.0756	5	36.1572	35.6258	35.6091		36.3433	4
35.8031	4	35.9456	35.5795	35.6281		36.2782	4	36.7874	36.4965	36.5759		32.3076	5	32.4465	32.3569	32.3109		34.3846	5	34.3404	34.3059	34.4534		34.7797	4	34.708	34.3679	34.4151		35.0848	5	34.8266	34.9032	34.9039		33.9651	5	34.3748	34.1955	34.1972		35.063	5	36.1499	35.6169	35.5996		36.3462	4
35.7964	4	35.9464	35.5795	35.6282		36.2684	4	36.7884	36.4967	36.5765		32.312	6	32.4524	32.364	32.3173		34.3835	5	34.3346	34.2997	34.448		34.7771	4	34.7087	34.3677	34.4147		35.0898	5	34.8225	34.8964	34.8981		33.9646	5	34.3701	34.191	34.1929		35.0501	5	36.1427	35.608	35.5902		36.3583	4
35.7848	4	35.9472	35.5796	35.6282		36.2455	4	36.7894	36.4969	36.5771		32.317	6	32.4583	32.371	32.3238		34.3799	4	34.3436	34.3094	34.4566		34.7749	4	34.7094	34.3676	34.4144		35.0969	5	34.8184	34.8897	34.8924		33.9631	5	34.3654	34.1864	34.1885		35.0434	5	36.1355	35.5992	35.5809		36.3683	4
35.7839	4	35.9481	35.5796	35.6283		36.215	4	36.7904	36.4971	36.5777		32.3283	6	32.4642	32.378	32.3302		34.3664	5	34.3377	34.3031	34.4511		34.7719	4	34.7101	34.3675	34.414		35.0955	5	34.8143	34.8829	34.8866		33.9585	5	34.3608	34.1819	34.1842		35.0398	5	36.1283	35.5905	35.5716		36.3739	4
35.7937	4	35.9489	35.5796	35.6284		36.1823	4	36.7914	36.4973	36.5783		32.3373	6	32.4701	32.385	32.3366		34.3479	5	34.3319	34.297	34.4456		34.7588	4	34.7108	34.3674	34.4137		35.0892	5	34.8102	34.8761	34.8809		33.9569	5	34.3562	34.1774	34.1799		35.0358	5	36.1211	35.5818	35.5624		36.3803	4
35.7949	4	35.9497	35.5796	35.6284		36.1554	4	36.7925	36.4975	36.5788		32.3483	6	32.476	32.3919	32.343		34.3362	5	34.3261	34.2908	34.4403		34.7433	4	34.7115	34.3673	34.4133		35.0903	5	34.8061	34.8694	34.8753		33.9563	5	34.3516	34.173	34.1756		35.0354	5	36.114	35.5732	35.5533		36.3772	4
35.7933	4	35.9505	35.5797	35.6285		36.1301	4	36.7935	36.4977	36.5794		32.382	6	32.4818	32.3987	32.3493		34.3302	5	34.3204	34.2848	34.4349		34.7252	4	34.7122	34.3672	34.413		35.0742	5	34.802	34.8627	34.8696		33.9562	5	34.347	34.1686	34.1714		35.035	5	36.1068	35.5646	35.5442		36.3701	4
35.7883	4	35.9514	35.5797	35.6286		36.1071	4	36.7945	36.4979	36.58		32.415	6	32.4877	32.4055	32.3556		34.3299	5	34.3147	34.2788	34.4296		34.7104	4	34.7129	34.3671	34.4127		35.0609	5	34.7979	34.856	34.8641		33.9553	5	34.3425	34.1642	34.1672		35.0342	5	36.0997	35.5561	35.5352		36.3713	4
35.7803	4	35.9522	35.5797	35.6287		36.0879	4	36.7955	36.498	36.5806		32.4468	6	32.4935	32.4123	32.3619		34.3286	5	34.309	34.2728	34.4244		34.6994	4	34.7136	34.367	34.4123		35.0557	5	34.7938	34.8493	34.8585		33.9574	6	34.3509	34.1742	34.1777		35.0312	5	36.0926	35.5476	35.5262		36.367	4
35.7808	4	35.953	35.5797	35.6287		36.0627	4	36.7965	36.4982	36.5811		32.4774	6	32.4992	32.4189	32.3681		34.3235	5	34.3034	34.2669	34.4192		34.7029	4	34.7143	34.3669	34.412		35.056	5	34.7898	34.8426	34.853		33.9743	6	34.3593	34.1841	34.1881		35.0256	5	36.0855	35.5391	35.5173		36.3716	4
35.7714	4	35.9538	35.5797	35.6288		36.0426	4	36.7975	36.4984	36.5817		32.4997	6	32.505	32.4256	32.3743		34.3225	5	34.2978	34.261	34.4141		34.6975	4	34.715	34.3669	34.4117		35.0595	5	34.7857	34.8359	34.8476		33.9917	6	34.3676	34.194	34.1984		35.0235	5	36.0785	35.5308	35.5084		36.3739	4
35.7371	4	35.9546	35.5797	35.6289		36.0245	4	36.7985	36.4986	36.5823		32.5247	6	32.5108	32.4322	32.3805		34.2606	4	34.307	34.2708	34.4228		34.7033	4	34.7157	34.3668	34.4113		35.0574	5	34.7816	34.8293	34.8421		34.0065	6	34.376	34.2038	34.2087		35.0216	5	36.0714	35.5224	35.4997		36.373	4
35.7274	4	35.9554	35.5797	35.629		36.0054	4	36.7995	36.4987	36.5828		32.5508	4	32.5165	32.4388	32.3866		34.2532	5	34.3013	34.2649	34.4176		34.7028	4	34.7164	34.3667	34.411		35.054	5	34.7776	34.8226	34.8367		34.0239	6	34.3842	34.2135	34.2189		35.0097	4	36.0735	35.526	35.5032		36.371	4
35.7181	4	35.9562	35.5797	35.6291		35.9887	4	36.8005	36.4989	36.5834		32.547	4	32.5222	32.4453	32.3927		34.2495	5	34.2958	34.259	34.4125		34.705	4	34.7171	34.3666	34.4107		35.0587	5	34.7735	34.816	34.8314		34.0588	6	34.3925	34.2232	34.229		34.988	4	36.0756	35.5295	35.5067		36.3666	4
35.7143	4	35.957	35.5797	35.6291		35.976	4	36.8014	36.499	36.584		32.5289	4	32.5279	32.4518	32.3987		34.2593	5	34.2903	34.2532	34.4075		34.6932	4	34.7178	34.3665	34.4104		35.0662	5	34.7695	34.8094	34.8261		34.0986	6	34.4007	34.2328	34.2391		34.9599	4	36.0776	35.533	35.5102		36.3686	4
35.7167	4	35.9578	35.5797	35.6292		35.9663	4	36.8024	36.4992	36.5845		32.5073	4	32.5336	32.4582	32.4048		34.2505	5	34.2848	34.2475	34.4024		34.6818	4	34.7184	34.3664	34.4101		35.0679	5	34.7654	34.8028	34.8208		34.1337	6	34.4089	34.2423	34.2491		34.9518	5	36.0706	35.5246	35.5014		36.3655	4
35.7223	4	35.9586	35.5797	35.6293		35.9494	4	36.8034	36.4993	36.5851		32.492	4	32.5392	32.4646	32.4108		34.2429	5	34.2793	34.2417	34.3975		34.674	4	34.7191	34.3663	34.4098		35.0632	5	34.7614	34.7962	34.8155		34.1702	4	34.417	34.2518	34.259		34.9484	5	36.0636	35.5163	35.4927		36.3629	4
35.7247	4	35.9594	35.5797	35.6294		35.9446	4	36.8044	36.4995	36.5857		32.4744	4	32.5448	32.4709	32.4167		34.2469	5	34.2739	34.2361	34.3925		34.6747	4	34.7198	34.3662	34.4095		35.0554	5	34.7573	34.7897	34.8103		34.2069	4	34.4251	34.2612	34.2688		34.9456	5	36.0565	35.5081	35.484		36.3586	4
35.7393	4	35.9602	35.5797	35.6295		35.9549	4	36.8054	36.4996	36.5862		32.4501	4	32.5504	32.4772	32.4226		34.2429	5	34.2685	34.2304	34.3877		34.6758	4	34.7204	34.3661	34.4092		35.0541	5	34.7533	34.7831	34.8052		34.2181	4	34.4332	34.2706	34.2786		34.9371	5	36.0496	35.4998	35.4754		36.3498	4
35.7488	4	35.961	35.5797	35.6296		35.9757	4	36.8063	36.4997	36.5868		32.4306	4	32.556	32.4834	32.4285		34.2453	5	34.2632	34.2249	34.3828		34.6717	4	34.7211	34.366	34.4089		35.0554	6	34.7595	34.7963	34.8169		34.2028	4	34.4413	34.2799	34.2883		34.9289	5	36.0426	35.4917	35.4668		36.3483	4
35.7591	4	35.9618	35.5797	35.6297		35.9876	4	36.8073	36.4999	36.5873		32.4117	5	32.5509	32.4775	32.4236		34.2069	5	34.2579	34.2193	34.378		34.6725	4	34.7218	34.3658	34.4086		35.0673	6	34.7657	34.8094	34.8285		34.1732	5	34.4361	34.2746	34.2831		34.9381	5	36.0356	35.4836	35.4583		36.3505	4
35.7691	4	35.9625	35.5797	35.6298		35.9857	4	36.8083	36.5	36.5879		32.3955	5	32.5458	32.4716	32.4188		34.204	5	34.2526	34.2138	34.3733		34.666	4	34.7224	34.3657	34.4083		35.0929	6	34.7719	34.8223	34.84		34.1401	5	34.431	34.2694	34.278		34.9395	5	36.0287	35.4755	35.4499		36.3541	4
35.7805	4	35.9633	35.5797	35.6299		35.9873	4	36.8092	36.5001	36.5884		32.3822	5	32.5407	32.4658	32.414		34.2157	5	34.2474	34.2084	34.3686		34.6591	4	34.7231	34.3656	34.408		35.1343	6	34.778	34.835	34.8514		34.112	5	34.426	34.2642	34.2729		34.926	5	36.0218	35.4674	35.4415		36.356	4
35.7946	4	35.9641	35.5797	35.63		35.9854	4	36.8102	36.5002	36.589		32.3764	5	32.5356	32.4601	32.4092		34.2269	5	34.2422	34.203	34.3639		34.6523	4	34.7238	34.3655	34.4077		35.191	4	34.7842	34.8475	34.8627		34.093	4	34.434	34.2736	34.2827		34.924	5	36.0149	35.4595	35.4332		36.3706	4
35.799	4	35.9649	35.5797	35.6301		35.9792	4	36.8111	36.5004	36.5895		32.3678	5	32.5305	32.4543	32.4046		34.2225	5	34.237	34.1976	34.3593		34.6528	4	34.7244	34.3654	34.4074		35.2228	4	34.7903	34.8599	34.8739		34.071	5	34.429	34.2684	34.2775		34.921	5	36.008	35.4515	35.4249		36.3791	4
35.8038	4	35.9656	35.5796	35.6301		35.9713	4	36.8121	36.5005	36.59		32.3642	5	32.5255	32.4486	32.3999		34.2318	5	34.2319	34.1923	34.3547		34.6583	4	34.7251	34.3652	34.4072		35.2221	4	34.7964	34.8721	34.8849		34.0473	5	34.4239	34.2632	34.2724		34.9179	5	36.0011	35.4436	35.4167		36.378	4
35.8062	4	35.9664	35.5796	35.6302		35.9659	4	36.813	36.5006	36.5906		32.3587	4	32.5312	32.4551	32.4059		34.2334	5	34.2268	34.187	34.3501		34.6692	4	34.7257	34.3651	34.4069		35.2033	4	34.8024	34.8841	34.8959		34.0292	5	34.4189	34.2581	34.2674		34.9176	5	35.9943	35.4358	35.4085		36.3755	4
35.809	4	35.9672	35.5796	35.6303		35.9626	4	36.814	36.5007	36.5911		32.3539	4	32.5368	32.4614	32.4119		34.2306	5	34.2217	34.1818	34.3456		34.6626	4	34.7264	34.365	34.4066		35.1822	4	34.8085	34.8959	34.9068		34.018	5	34.4139	34.253	34.2624		34.9162	5	35.9875	35.428	35.4005		36.3765	4
35.8185	4	35.9679	35.5796	35.6304		35.9601	4	36.8149	36.5008	36.5916		32.3465	5	32.5318	32.4557	32.4071		34.2278	5	34.2167	34.1766	34.3412		34.653	4	34.727	34.3649	34.4063		35.1606	4	34.8145	34.9076	34.9175		34.0072	5	34.4089	34.2479	34.2574		34.8964	5	35.9806	35.4202	35.3924		36.372	4
35.8252	4	35.9687	35.5796	35.6305		35.9559	4	36.8159	36.5009	36.5921		32.3403	5	32.5267	32.45	32.4025		34.2299	5	34.2117	34.1715	34.3368		34.6474	4	34.7276	34.3647	34.4061		35.1353	4	34.8205	34.9191	34.9281		34.001	5	34.404	34.2429	34.2524		34.8879	5	35.9738	35.4125	35.3844		36.3516	4
35.8071	4	35.9695	35.5795	35.6306		35.9488	4	36.8168	36.501	36.5927		32.3393	5	32.5217	32.4443	32.3979		34.2269	6	34.2212	34.1818	34.3459		34.6511	4	34.7283	34.3646	34.4058		35.1038	4	34.8265	34.9305	34.9387		33.9967	5	34.3991	34.2379	34.2475		34.8807	5	35.9671	35.4048	35.3765		36.3371	4
35.7872	4	35.9702	35.5795	35.6306		35.9437	4	36.8177	36.5011	36.5932		32.3386	5	32.5167	32.4387	32.3933		34.2065	6	34.2306	34.192	34.3549		34.6508	4	34.7289	34.3645	34.4056		35.0724	4	34.8325	34.9416	34.9491		33.9838	5	34.3942	34.233	34.2427		34.8759	5	35.9603	35.3972	35.3686		36.3227	4
35.774	4	35.971	35.5795	35.6307		35.9355	4	36.8187	36.5012	36.5937		32.3301	5	32.5118	32.4331	32.3888		34.1685	6	34.24	34.2022	34.3639		34.6569	4	34.7296	34.3643	34.4053		35.0453	5	34.8284	34.9348	34.9431		33.9734	5	34.3894	34.228	34.2378		34.871	5	35.9536	35.3896	35.3608		36.3117	4
35.7657	4	35.9717	35.5795	35.6308		35.9291	4	36.8196	36.5012	36.5942		32.3293	5	32.5068	32.4276	32.3843		34.205	6	34.2494	34.2123	34.3728		34.6422	4	34.7302	34.3642	34.4051		35.025	5	34.8243	34.9279	34.9371		33.9619	5	34.3846	34.2232	34.233		34.871	5	35.9468	35.382	35.353		36.2877	4
35.771	4	35.9725	35.5794	35.6309		35.9218	4	36.8205	36.5013	36.5947		32.3384	5	32.5019	32.4221	32.3799		34.2476	6	34.2587	34.2223	34.3817		34.628	4	34.7308	34.364	34.4048		34.9936	5	34.8202	34.921	34.9312		33.9419	5	34.3798	34.2183	34.2282		34.8701	5	35.9401	35.3745	35.3453		36.2564	4
35.7693	4	35.9732	35.5794	35.6309		35.9153	4	36.8214	36.5014	36.5952		32.3424	4	32.5077	32.4287	32.386		34.273	6	34.268	34.2323	34.3906		34.6133	4	34.7314	34.3639	34.4046		34.9704	5	34.816	34.9142	34.9253		33.9285	5	34.3751	34.2135	34.2235		34.8578	5	35.9334	35.3671	35.3377		36.2279	4
35.762	4	35.9739	35.5794	35.631		35.9103	4	36.8224	36.5015	36.5957		32.3402	5	32.5028	32.4232	32.3815		34.3043	6	34.2773	34.2423	34.3994		34.5986	4	34.7321	34.3638	34.4043		34.9538	5	34.8119	34.9074	34.9195		33.9157	5	34.3704	34.2087	34.2188		34.8521	5	35.9268	35.3597	35.3301		36.2137	4
35.7659	4	35.9747	35.5793	35.6311		35.9033	4	36.8233	36.5015	36.5962		32.3345	5	32.4979	32.4178	32.3771		34.3543	4	34.2865	34.2522	34.4081		34.5757	4	34.7327	34.3636	34.4041		34.9331	5	34.8078	34.9005	34.9137		33.9026	5	34.3657	34.204	34.2141		34.8535	5	35.9201	35.3523	35.3225		36.1952	4
35.7676	4	35.9754	35.5793	35.6312		35.8955	4	36.8242	36.5016	36.5967		32.3265	5	32.493	32.4124	32.3728		34.3519	4	34.2957	34.262	34.4168		34.5582	4	34.7333	34.3635	34.4039		34.9133	5	34.8037	34.8937	34.9079		33.8874	5	34.3611	34.1993	34.2095		34.8477	5	35.9135	35.3449	35.315		36.1925	4
35.7569	4	35.9762	35.5793	35.6312		35.8879	4	36.8251	36.5017	36.5972		32.3275	5	32.4882	32.407	32.3685		34.3536	4	34.3048	34.2718	34.4255		34.536	4	34.7339	34.3633	34.4036		34.8961	5	34.7997	34.887	34.9022		33.8795	5	34.3564	34.1946	34.2049		34.8482	5	35.9068	35.3376	35.3075		36.1851	4
35.7434	4	35.9769	35.5792	35.6313		35.8823	4	36.826	36.5017	36.5977		32.3272	5	32.4833	32.4017	32.3643		34.3502	4	34.3139	34.2816	34.4341		34.5164	4	34.7346	34.3632	34.4034		34.8656	5	34.7956	34.8802	34.8966		33.8758	5	34.3519	34.19	34.2003		34.8446	5	35.9002	35.3304	35.3001		36.1711	4
35.7421	4	35.9776	35.5792	35.6313		35.8774	4	36.8269	36.5018	36.5982		32.3236	4	32.4892	32.4084	32.3704		34.3185	4	34.323	34.2913	34.4427		34.4994	4	34.7352	34.363	34.4032		34.8435	5	34.7915	34.8734	34.8909		33.8708	5	34.3473	34.1853	34.1958		34.8486	5	35.8937	35.3232	35.2928		36.1584	4
35.7383	4	35.9783	35.5792	35.6314		35.8677	4	36.8278	36.5018	36.5987		32.3186	4	32.495	32.415	32.3765		34.3029	5	34.3173	34.2852	34.4372		34.4828	4	34.7358	34.3629	34.4029		34.8247	5	34.7874	34.8667	34.8853		33.8661	5	34.3428	34.1808	34.1913		34.853	5	35.8871	35.316	35.2854		36.1423	4
35.7284	4	35.9791	35.5791	35.6315		35.8564	4	36.8287	36.5019	36.5991		32.3188	4	32.5007	32.4217	32.3825		34.2865	5	34.3116	34.2791	34.4317		34.4703	4	34.7364	34.3627	34.4027		34.8076	5	34.7833	34.86	34.8798		33.8616	5	34.3383	34.1762	34.1868		34.8386	5	35.8805	35.3089	35.2782		36.1294	4
35.7229	4	35.9798	35.5791	35.6315		35.849	4	36.8296	36.5019	36.5996		32.3163	4	32.5065	32.4282	32.3885		34.2829	5	34.306	34.2731	34.4263		34.4598	4	34.737	34.3625	34.4024		34.792	5	34.7793	34.8533	34.8743		33.8558	5	34.3338	34.1717	34.1824		34.8275	4	35.8832	35.3139	35.2832		36.1187	4
35.7291	4	35.9805	35.5791	35.6316		35.8441	4	36.8305	36.502	36.6001		32.3166	5	32.5016	32.4227	32.3839		34.2857	5	34.3004	34.2671	34.4209		34.4483	4	34.7376	34.3624	34.4022		34.7822	5	34.7752	34.8466	34.8688		33.8543	5	34.3294	34.1672	34.178		34.804	4	35.8858	35.3189	35.2882		36.1083	4
35.7341	4	35.9812	35.579	35.6316		35.8528	4	36.8314	36.502	36.6006		32.3118	5	32.4967	32.4172	32.3794		34.2616	5	34.2948	34.2612	34.4156		34.4382	4	34.7382	34.3622	34.402		34.7705	5	34.7712	34.8399	34.8634		33.8554	5	34.325	34.1628	34.1736		34.7826	5	35.8792	35.3117	35.2809		36.1007	4
35.7407	4	35.9819	35.579	35.6317		35.8624	4	36.8323	36.5021	36.6011		32.3055	5	32.4918	32.4118	32.3749		34.2654	5	34.2893	34.2554	34.4103		34.4244	4	34.7388	34.3621	34.4017		34.7548	5	34.7671	34.8332	34.858		33.8464	5	34.3206	34.1583	34.1693		34.7756	5	35.8727	35.3046	35.2737		36.0905	4
35.7454	4	35.9827	35.5789	35.6317		35.8702	4	36.8332	36.5021	36.6015		32.3033	5	32.487	32.4064	32.3705		34.2598	5	34.2838	34.2496	34.4051		34.4214	4	34.7394	34.3619	34.4015		34.7422	5	34.7631	34.8266	34.8526		33.8371	5	34.3163	34.154	34.165		34.7757	5	35.8662	35.2975	35.2665		36.0938	4
35.7542	4	35.9834	35.5789	35.6318		35.8809	4	36.8341	36.5021	36.602		32.3016	5	32.4822	32.4011	32.3661		34.2662	5	34.2784	34.2438	34.3999		34.414	4	34.74	34.3617	34.4012		34.7337	5	34.7591	34.8199	34.8473		33.8303	5	34.3119	34.1496	34.1607		34.79	5	35.8597	35.2905	35.2593		36.1129	4
35.7547	4	35.9841	35.5788	35.6318		35.9006	4	36.8349	36.5022	36.6025		32.2983	5	32.4774	32.3958	32.3618		34.2659	5	34.273	34.2381	34.3948		34.4073	4	34.7406	34.3616	34.401		34.7294	5	34.755	34.8133	34.842		33.827	5	34.3077	34.1453	34.1564		34.7936	5	35.8532	35.2835	35.2523		36.1244	4
35.7412	4	35.9848	35.5788	35.6319		35.9329	4	36.8358	36.5022	36.6029		32.2976	5	32.4726	32.3905	32.3575		34.2729	5	34.2676	34.2324	34.3898		34.4019	4	34.7412	34.3614	34.4007		34.7258	5	34.751	34.8067	34.8368		33.8206	5	34.3034	34.141	34.1522		34.7999	5	35.8467	35.2765	35.2452		36.1405	4
35.7217	4	35.9855	35.5788	35.6319		35.9516	4	36.8367	36.5022	36.6034		32.2951	5	32.4679	32.3853	32.3533		34.2786	5	34.2622	34.2268	34.3848		34.3934	4	34.7418	34.3612	34.4005		34.7214	5	34.747	34.8001	34.8316		33.8163	5	34.2992	34.1367	34.148		34.8094	5	35.8403	35.2696	35.2382		36.1578	4
35.6951	4	35.9862	35.5787	35.632		35.9596	4	36.8376	36.5022	36.6038		32.2894	5	32.4632	32.3801	32.3491		34.2798	5	34.2569	34.2212	34.3798		34.3873	4	34.7424	34.3611	34.4002		34.7147	5	34.743	34.7935	34.8264		33.8122	5	34.295	34.1324	34.1439		34.8125	4	35.843	35.2749	35.2435		36.1805	4
35.6842	4	35.9869	35.5787	35.632		35.9545	4	36.8384	36.5023	36.6043		32.2869	5	32.4585	32.375	32.3449		34.2412	5	34.2517	34.2157	34.3749		34.3864	4	34.743	34.3609	34.4		34.7099	5	34.739	34.787	34.8213		33.81	5	34.2908	34.1282	34.1397		34.8047	5	35.8366	35.268	35.2365		36.1981	4
35.6777	4	35.9876	35.5786	35.6321		35.9451	4	36.8393	36.5023	36.6047		32.284	5	32.4538	32.3699	32.3409		34.2416	4	34.261	34.2257	34.3837		34.3731	4	34.7435	34.3607	34.3997		34.7112	5	34.735	34.7804	34.8161		33.8057	5	34.2866	34.1241	34.1356		34.8093	5	35.8302	35.2611	35.2296		36.2007	4
35.6727	4	35.9883	35.5786	35.6321		35.9424	4	36.8402	36.5023	36.6052		32.2792	5	32.4491	32.3648	32.3368		34.2345	5	34.2557	34.2201	34.3787		34.3676	4	34.7441	34.3606	34.3995		34.7163	5	34.731	34.7739	34.8111		33.8023	5	34.2825	34.1199	34.1316		34.8151	5	35.8238	35.2543	35.2227		36.2057	4
35.6754	4	35.989	35.5785	35.6322		35.9413	4	36.841	36.5023	36.6056		32.2789	5	32.4445	32.3598	32.3328		34.18	5	34.2505	34.2146	34.3738		34.3771	4	34.7447	34.3604	34.3992		34.7157	6	34.7372	34.7873	34.823		33.8039	5	34.2784	34.1158	34.1275		34.8206	5	35.8174	35.2475	35.2158		36.2018	4
35.6865	4	35.9896	35.5785	35.6322		35.9348	4	36.8419	36.5023	36.6061		32.2714	5	32.4399	32.3548	32.3289		34.2082	5	34.2452	34.2091	34.3689		34.3765	4	34.7453	34.3602	34.399		34.7232	6	34.7435	34.8004	34.8347		33.8077	5	34.2743	34.1117	34.1235		34.8218	5	35.811	35.2407	35.209		36.1932	4
35.7015	4	35.9903	35.5784	35.6323		35.9319	4	36.8427	36.5023	36.6065		32.2629	5	32.4353	32.3499	32.325		34.2152	5	34.2401	34.2037	34.364		34.3822	4	34.7459	34.36	34.3987		34.7343	6	34.7497	34.8134	34.8463		33.8052	5	34.2703	34.1076	34.1196		34.8244	5	35.8046	35.234	35.2023		36.1885	4
35.7119	4	35.991	35.5784	35.6323		35.9348	4	36.8436	36.5023	36.607		32.25	5	32.4307	32.345	32.3211		34.2293	5	34.2349	34.1983	34.3592		34.3909	4	34.7464	34.3599	34.3984		34.7379	4	34.756	34.8262	34.8579		33.8004	5	34.2663	34.1036	34.1156		34.82	5	35.7983	35.2274	35.1956		36.1866	4
35.7123	4	35.9917	35.5784	35.6324		35.9445	4	36.8444	36.5024	36.6074		32.2453	5	32.4262	32.3401	32.3173		34.234	5	34.2298	34.1929	34.3544		34.4032	4	34.747	34.3597	34.3982		34.7322	4	34.7622	34.8388	34.8693		33.7947	5	34.2623	34.0996	34.1117		34.82	5	35.7919	35.2207	35.1889		36.1825	4
35.7137	4	35.9924	35.5783	35.6324		35.9339	4	36.8453	36.5024	36.6078		32.2404	5	32.4217	32.3353	32.3136		34.2455	5	34.2247	34.1876	34.3497		34.4167	4	34.7476	34.3596	34.3979		34.7246	5	34.7581	34.8322	34.8639		33.7871	5	34.2583	34.0956	34.1078		34.8206	5	35.7856	35.2141	35.1823		36.1769	4
35.705	4	35.9931	35.5783	35.6324		35.9373	4	36.8461	36.5023	36.6082		32.2362	5	32.4172	32.3305	32.3099		34.2497	5	34.2197	34.1824	34.345		34.4194	4	34.7481	34.3594	34.3976		34.714	5	34.7541	34.8255	34.8585		33.7795	5	34.2544	34.0916	34.1039		34.8124	4	35.7886	35.2199	35.188		36.1698	4
35.6932	4	35.9937	35.5782	35.6325		35.9394	5	36.8331	36.4862	36.5884		32.2329	5	32.4127	32.3258	32.3062		34.2465	5	34.2147	34.1772	34.3404		34.4193	4	34.7487	34.3592	34.3974		34.7068	5	34.7501	34.8189	34.8532		33.7727	5	34.2505	34.0877	34.1001		34.7997	5	35.7823	35.2133	35.1813		36.1694	4
35.6845	4	35.9944	35.5782	35.6325		35.9229	5	36.8202	36.4701	36.5688		32.2337	5	32.4082	32.321	32.3026		34.2593	5	34.2097	34.172	34.3358		34.4321	4	34.7493	34.3591	34.3971		34.7035	5	34.7461	34.8123	34.8479		33.7721	5	34.2466	34.0838	34.0963		34.7878	5	35.776	35.2068	35.1748		36.1794	4
35.6843	4	35.9951	35.5781	35.6326		35.9053	5	36.8073	36.4542	36.5494		32.2333	5	32.4038	32.3164	32.299		34.2637	4	34.2192	34.1822	34.3448		34.4346	4	34.7498	34.3589	34.3968		34.7047	5	34.742	34.8057	34.8426		33.7741	5	34.2427	34.0799	34.0925		34.7801	5	35.7697	35.2002	35.1682		36.1838	4
35.6736	4	35.9957	35.5781	35.6326		35.8904	4	36.8083	36.4545	36.5501		32.235	5	32.3994	32.3117	32.2955		34.2555	5	34.2142	34.177	34.3402		34.4293	4	34.7504	34.3588	34.3965		34.7134	5	34.738	34.7991	34.8374		33.7742	5	34.2389	34.0761	34.0887		34.7792	5	35.7634	35.1938	35.1617		36.1707	4
35.6748	4	35.9964	35.5781	35.6327		35.8819	5	36.7955	36.4387	36.5309		32.2367	5	32.395	32.3071	32.292		34.2375	5	34.2092	34.1718	34.3356		34.425	4	34.7509	34.3587	34.3963		34.7122	5	34.734	34.7925	34.8322		33.7785	4	34.2477	34.0865	34.0996		34.7791	5	35.7572	35.1874	35.1553		36.1592	4
35.6907	4	35.9971	35.578	35.6327		35.8679	5	36.7827	36.423	36.5119		32.2324	5	32.3906	32.3025	32.2886		34.2452	5	34.2043	34.1667	34.331		34.4237	4	34.7515	34.3585	34.396		34.7156	5	34.73	34.7859	34.827		33.7705	5	34.2439	34.0826	34.0957		34.7792	5	35.751	35.181	35.1489		36.1494	4
35.6733	4	35.9977	35.578	35.6327		35.8632	4	36.7837	36.4235	36.5128		32.2213	5	32.3863	32.298	32.2852		34.2493	5	34.1994	34.1616	34.3265		34.4188	4	34.752	34.3584	34.3957		34.7168	5	34.7261	34.7794	34.8219		33.7591	5	34.24	34.0787	34.0919		34.7793	5	35.7448	35.1746	35.1425		36.1355	4
35.6531	4	35.9984	35.5779	35.6328		35.8575	5	36.771	36.4079	36.494		32.209	5	32.3819	32.2935	32.2818		34.2491	5	34.1945	34.1565	34.322		34.4229	4	34.7526	34.3583	34.3954		34.7185	5	34.7221	34.7729	34.8168		33.7581	5	34.2362	34.0749	34.0882		34.7785	5	35.7386	35.1683	35.1362		36.1275	4
35.6175	4	35.999	35.5779	35.6328		35.8519	5	36.7583	36.3925	36.4754		32.1933	5	32.3776	32.289	32.2785		34.2461	5	34.1897	34.1515	34.3175		34.4296	4	34.7531	34.3581	34.3951		34.7197	5	34.7181	34.7664	34.8118		33.7608	5	34.2324	34.071	34.0844		34.7772	5	35.7324	35.162	35.13		36.1388	4
35.5844	4	35.9997	35.5778	35.6329		35.8476	4	36.7594	36.3931	36.4764		32.1831	5	32.3734	32.2846	32.2752		34.2418	5	34.1849	34.1465	34.3131		34.4385	4	34.7537	34.358	34.3949		34.7189	5	34.7141	34.7599	34.8068		33.7593	5	34.2286	34.0672	34.0807		34.7793	5	35.7262	35.1558	35.1237		36.1442	4
35.5532	4	36.0003	35.5778	35.6329		35.8459	5	36.7468	36.3778	36.458		32.1748	5	32.3691	32.2802	32.2719		34.2436	5	34.1801	34.1416	34.3087		34.4428	4	34.7542	34.3579	34.3946		34.7229	4	34.7204	34.7735	34.8187		33.7532	5	34.2249	34.0635	34.077		34.7828	5	35.7201	35.1496	35.1175		36.1459	4
35.5261	4	36.001	35.5778	35.6329		35.8326	5	36.7342	36.3626	36.4398		32.173	5	32.3648	32.2759	32.2687		34.2422	5	34.1754	34.1367	34.3044		34.4454	4	34.7548	34.3577	34.3943		34.7124	4	34.7268	34.787	34.8306		33.7554	5	34.2212	34.0597	34.0734		34.7862	5	35.714	35.1434	35.1114		36.1446	4
35.5043	4	36.0016	35.5777	35.633		35.8169	5	36.7217	36.3475	36.4218		32.1755	5	32.3606	32.2715	32.2656		34.2466	5	34.1707	34.1318	34.3001		34.4442	4	34.7553	34.3576	34.394		34.7018	4	34.733	34.8003	34.8423		33.7629	5	34.2175	34.056	34.0697		34.7827	5	35.7079	35.1373	35.1053		36.1446	4
35.486	4	36.0023	35.5777	35.633		35.8082	5	36.7093	36.3326	36.4039		32.1754	5	32.3564	32.2673	32.2625		34.2477	5	34.166	34.127	34.2959		34.4464	4	34.7558	34.3574	34.3937		34.6901	4	34.7393	34.8134	34.8539		33.7678	5	34.2138	34.0523	34.0661		34.7797	6	35.711	35.1436	35.1115		36.1518	4
35.472	4	36.0029	35.5776	35.633		35.807	5	36.6968	36.3178	36.3863		32.1766	5	32.3522	32.263	32.2594		34.2477	5	34.1614	34.1222	34.2917		34.4544	4	34.7564	34.3573	34.3934		34.6772	5	34.7353	34.8069	34.8486		33.7679	5	34.2102	34.0486	34.0625		34.7756	6	35.7141	35.1499	35.1176		36.1561	4
35.4554	4	36.0036	35.5776	35.633		35.8087	5	36.6845	36.3031	36.3688		32.1781	5	32.3481	32.2588	32.2563		34.2557	5	34.1568	34.1175	34.2875		34.4688	4	34.7569	34.3571	34.3931		34.6709	5	34.7313	34.8003	34.8434		33.7679	5	34.2066	34.045	34.059		34.7756	6	35.7173	35.1561	35.1237		36.1621	4
35.454	4	36.0042	35.5775	35.6331		35.8095	5	36.6722	36.2885	36.3515		32.169	5	32.3439	32.2546	32.2533		34.2579	5	34.1522	34.1128	34.2833		34.4903	4	34.7574	34.357	34.3929		34.6701	5	34.7273	34.7937	34.8382		33.7709	5	34.203	34.0414	34.0554		34.7764	6	35.7204	35.1623	35.1298		36.1567	4
35.4556	4	36.0048	35.5775	35.6331		35.8071	5	36.6599	36.274	36.3344		32.1512	5	32.3398	32.2504	32.2503		34.2636	5	34.1477	34.1081	34.2792		34.5116	4	34.758	34.3568	34.3926		34.6643	5	34.7233	34.7872	34.833		33.7764	5	34.1994	34.0378	34.0519		34.7872	6	35.7235	35.1684	35.1358		36.1576	4
35.4589	4	36.0055	35.5775	35.6331		35.7969	5	36.6477	36.2597	36.3175		32.1349	5	32.3357	32.2463	32.2474		34.254	5	34.1432	34.1035	34.2752		34.5221	4	34.7585	34.3566	34.3923		34.6652	5	34.7194	34.7807	34.8279		33.7818	5	34.1958	34.0342	34.0484		34.8046	6	35.7266	35.1745	35.1418		36.1554	4
35.461	4	36.0061	35.5774	35.6331		35.7887	5	36.6356	36.2455	36.3008		32.1243	5	32.3316	32.2422	32.2445		34.2538	5	34.1387	34.0989	34.2712		34.5388	4	34.759	34.3565	34.392		34.668	5	34.7154	34.7742	34.8228		33.7816	5	34.1923	34.0306	34.045		34.8256	6	35.7297	35.1805	35.1477		36.151	4
35.4651	4	36.0067	35.5774	35.6332		35.7829	5	36.6235	36.2314	36.2842		32.1188	5	32.3276	32.2381	32.2416		34.2529	5	34.1343	34.0944	34.2672		34.5555	4	34.7596	34.3563	34.3917		34.665	5	34.7114	34.7677	34.8177		33.7751	5	34.1888	34.0271	34.0415		34.8588	6	35.7328	35.1865	35.1536		36.1439	4
35.4679	4	36.0074	35.5773	35.6332		35.7772	5	36.6114	36.2174	36.2679		32.1154	5	32.3235	32.2341	32.2387		34.2503	5	34.1298	34.0899	34.2633		34.5513	4	34.7601	34.3562	34.3914		34.6686	5	34.7074	34.7612	34.8127		33.769	5	34.1853	34.0236	34.0381		34.8945	6	35.7359	35.1925	35.1595		36.1417	4
35.4661	4	36.008	35.5773	35.6332		35.7616	5	36.5994	36.2035	36.2517		32.1121	5	32.3195	32.2301	32.2359		34.2477	5	34.1255	34.0854	34.2594		34.5475	4	34.7606	34.356	34.3911		34.6752	5	34.7035	34.7548	34.8077		33.7583	5	34.1819	34.0201	34.0347		34.9254	6	35.7389	35.1985	35.1653		36.1459	4
35.4538	4	36.0086	35.5772	35.6332		35.744	5	36.5875	36.1897	36.2356		32.111	5	32.3155	32.2261	32.2331		34.2442	5	34.1211	34.0809	34.2556		34.5459	4	34.7611	34.3558	34.3908		34.6663	5	34.6995	34.7483	34.8027		33.7512	5	34.1785	34.0167	34.0313		34.9502	6	35.742	35.2043	35.1711		36.1538	4
35.453	4	36.0092	35.5772	35.6332		35.7344	5	36.5756	36.176	36.2198		32.1077	5	32.3115	32.2222	32.2303		34.2485	5	34.1168	34.0765	34.2517		34.5465	4	34.7616	34.3557	34.3905		34.6613	5	34.6956	34.7419	34.7978		33.7443	4	34.1875	34.0275	34.0425		34.9632	6	35.745	35.2102	35.1769		36.1543	4
35.4537	4	36.0099	35.5771	35.6333		35.7299	5	36.5637	36.1625	36.2041		32.1033	5	32.3075	32.2182	32.2276		34.2494	5	34.1125	34.0722	34.248		34.5622	4	34.7621	34.3555	34.3901		34.6586	5	34.6916	34.7355	34.7929		33.7331	5	34.184	34.0239	34.0391		34.984	6	35.7481	35.216	35.1826		36.1576	4
35.451	4	36.0105	35.5771	35.6333		35.7237	5	36.5519	36.1491	36.1886		32.098	5	32.3036	32.2144	32.2249		34.258	5	34.1082	34.0678	34.2442		34.579	4	34.7627	34.3553	34.3898		34.6588	5	34.6877	34.7291	34.788		33.7376	5	34.1806	34.0204	34.0357		34.9975	6	35.7511	35.2218	35.1883		36.1508	4
35.4579	4	36.0111	35.577	35.6333		35.7125	5	36.5402	36.1357	36.1732		32.0943	5	32.2997	32.2105	32.2222		34.2529	6	34.1181	34.0786	34.2537		34.5882	4	34.7632	34.3551	34.3895		34.6615	5	34.6838	34.7227	34.7832		33.7452	5	34.1772	34.017	34.0323		35.0081	6	35.7541	35.2275	35.1939		36.1332	4
35.4703	4	36.0117	35.577	35.6333		35.7001	5	36.5285	36.1225	36.158		32.092	5	32.2958	32.2067	32.2196		34.2577	6	34.1279	34.0892	34.263		34.5853	4	34.7637	34.355	34.3892		34.6643	5	34.6798	34.7164	34.7784		33.753	5	34.1738	34.0135	34.0289		35.0201	6	35.7571	35.2332	35.1996		36.112	4
35.4688	4	36.0123	35.577	35.6333		35.6881	5	36.5168	36.1094	36.143		32.0896	5	32.2919	32.2029	32.2169		34.2593	6	34.1377	34.0999	34.2724		34.5883	4	34.7642	34.3548	34.3889		34.6654	6	34.6863	34.7308	34.7907		33.76	5	34.1704	34.0101	34.0256		35.0273	6	35.7601	35.2389	35.2051		36.0932	4
35.4817	4	36.0129	35.5769	35.6334		35.6825	4	36.5187	36.1116	36.1455		32.0927	5	32.288	32.1992	32.2144		34.2724	6	34.1475	34.1104	34.2816		34.5794	4	34.7647	34.3546	34.3886		34.6775	6	34.6927	34.745	34.8029		33.7638	5	34.167	34.0067	34.0223		35.0212	6	35.7631	35.2445	35.2107		36.0847	4
35.4923	4	36.0135	35.5769	35.6334		35.693	4	36.5206	36.1139	36.1481		32.0975	5	32.2842	32.1955	32.2118		34.2888	6	34.1572	34.1209	34.2909		34.5716	4	34.7652	34.3545	34.3883		34.6901	6	34.6991	34.7591	34.815		33.7702	5	34.1637	34.0034	34.019		35.0222	6	35.7661	35.2501	35.2162		36.0885	4
35.5052	4	36.0141	35.5769	35.6334		35.6799	5	36.509	36.1008	36.1332		32.0994	5	32.2803	32.1918	32.2093		34.3084	6	34.1669	34.1314	34.3		34.5364	4	34.7657	34.3543	34.388		34.7029	6	34.7055	34.773	34.8269		33.774	5	34.1604	34	34.0157		34.998	6	35.7691	35.2556	35.2217		36.1077	4
35.5276	4	36.0147	35.5769	35.6334		35.6513	5	36.4974	36.0879	36.1184		32.1017	5	32.2765	32.1882	32.2068		34.339	6	34.1765	34.1418	34.3092		34.495	4	34.7662	34.3541	34.3876		34.7175	6	34.7118	34.7866	34.8387		33.7755	5	34.1571	33.9967	34.0125		34.9593	6	35.772	35.2611	35.2271		36.1132	4
35.5445	4	36.0153	35.5768	35.6334		35.6338	5	36.4859	36.075	36.1037		32.1036	5	32.2727	32.1846	32.2043		34.3762	6	34.1861	34.1522	34.3183		34.4709	4	34.7667	34.3539	34.3873		34.7351	6	34.7181	34.8001	34.8504		33.7712	5	34.1538	33.9934	34.0093		34.9278	6	35.775	35.2666	35.2325		36.1167	4
35.5531	4	36.0159	35.5768	35.6334		35.6179	5	36.4744	36.0623	36.0893		32.0949	5	32.2689	32.181	32.2019		34.4179	6	34.1957	34.1625	34.3273		34.4579	4	34.7672	34.3538	34.387		34.7773	6	34.7245	34.8134	34.862		33.7661	5	34.1506	33.9901	34.0061		34.8986	6	35.7779	35.272	35.2379		36.1181	4
35.5648	4	36.0165	35.5768	35.6334		35.6069	5	36.463	36.0496	36.075		32.0776	5	32.2652	32.1775	32.1995		34.4537	6	34.2052	34.1727	34.3363		34.4446	4	34.7677	34.3536	34.3867		34.8181	6	34.7307	34.8266	34.8735		33.7649	5	34.1473	33.9869	34.003		34.874	6	35.7809	35.2774	35.2432		36.1218	4
35.5908	4	36.0171	35.5768	35.6334		35.5989	5	36.4516	36.0371	36.0608		32.0651	5	32.2614	32.1739	32.1971		34.4892	6	34.2147	34.1829	34.3452		34.4378	4	34.7682	34.3534	34.3864		34.8605	6	34.737	34.8395	34.8848		33.7645	5	34.1441	33.9837	33.9998		34.858	6	35.7838	35.2828	35.2485		36.1352	4
35.6052	4	36.0177	35.5768	35.6334		35.5952	5	36.4403	36.0247	36.0468		32.0528	5	32.2577	32.1705	32.1948		34.5199	4	34.2242	34.193	34.3541		34.4266	4	34.7687	34.3533	34.3861		34.9004	6	34.7433	34.8523	34.896		33.7618	5	34.141	33.9805	33.9967		34.8524	4	35.7867	35.2881	35.2538		36.1465	4
35.6153	4	36.0183	35.5768	35.6334		35.5956	5	36.429	36.0123	36.033		32.0419	4	32.2643	32.1787	32.2016		34.5345	4	34.2336	34.2031	34.3629		34.4258	4	34.7691	34.3531	34.3858		34.9457	6	34.7495	34.8649	34.9072		33.7629	5	34.1378	33.9773	33.9936		34.841	4	35.7896	35.2933	35.259		36.1411	4
35.6303	4	36.0189	35.5767	35.6334		35.5988	5	36.4178	36.0001	36.0193		32.0351	4	32.2709	32.1868	32.2084		34.5183	4	34.243	34.2131	34.3717		34.4311	4	34.7696	34.3529	34.3854		34.9845	6	34.7557	34.8773	34.9182		33.7649	5	34.1347	33.9742	33.9906		34.8286	5	35.7833	35.2864	35.2519		36.135	4
35.6431	4	36.0195	35.5767	35.6334		35.601	5	36.4066	35.988	36.0057		32.0264	4	32.2774	32.1949	32.2151		34.5769	5	34.2378	34.2075	34.3667		34.4462	4	34.7701	34.3528	34.3851		35.0196	6	34.7619	34.8896	34.9291		33.7632	5	34.1315	33.971	33.9875		34.8317	5	35.7771	35.2795	35.2449		36.1242	4
35.6512	4	36.0201	35.5767	35.6334		35.5994	5	36.3955	35.9759	35.9923		32.0269	4	32.2839	32.2029	32.2218		34.4026	5	34.2327	34.202	34.3616		34.4591	4	34.7706	34.3526	34.3848		35.0475	6	34.7681	34.9017	34.9399		33.7575	5	34.1284	33.9679	33.9845		34.8386	5	35.7708	35.2726	35.2379		36.1133	4
35.6666	4	36.0207	35.5767	35.6334		35.5913	5	36.3844	35.964	35.9791		32.0374	4	32.2904	32.2109	32.2285		34.3815	5	34.2276	34.1965	34.3567		34.4576	4	34.7711	34.3524	34.3845		35.0635	6	34.7743	34.9137	34.9505		33.7543	5	34.1253	33.9649	33.9815		34.8429	5	35.7645	35.2657	35.2309		36.1032	4
35.6782	4	36.0212	35.5767	35.6334		35.5837	5	36.3733	35.9522	35.966		32.0577	4	32.2969	32.2188	32.2351		34.5564	5	34.2225	34.1911	34.3517		34.4357	4	34.7716	34.3523	34.3842		35.0471	6	34.7804	34.9255	34.9611		33.7463	5	34.1223	33.9618	33.9785		34.8443	5	35.7583	35.2589	35.2241		36.0829	4
35.6867	4	36.0218	35.5767	35.6334		35.5781	5	36.3624	35.9404	35.953		32.078	4	32.3034	32.2266	32.2417		34.3485	5	34.2175	34.1857	34.3468		34.4209	4	34.772	34.3521	34.3839		35.0003	6	34.7865	34.9371	34.9716		33.7426	5	34.1192	33.9588	33.9755		34.849	5	35.7521	35.2522	35.2172		36.0657	4
35.6939	4	36.0224	35.5767	35.6334		35.5764	5	36.3514	35.9288	35.9402		32.0837	5	32.2994	32.2227	32.2387		34.435	5	34.2125	34.1803	34.342		34.4285	4	34.7725	34.3519	34.3835		34.9547	6	34.7926	34.9486	34.9819		33.7385	5	34.1162	33.9557	33.9726		34.851	5	35.7458	35.2454	35.2104		36.0528	4
35.7025	4	36.023	35.5767	35.6334		35.5763	5	36.3405	35.9172	35.9275		32.0854	5	32.2955	32.2188	32.2357		34.3503	5	34.2076	34.175	34.3372		34.4297	4	34.773	34.3518	34.3832		34.9227	6	34.7987	34.96	34.9922		33.7363	5	34.1132	33.9527	33.9696		34.8554	4	35.7489	35.251	35.216		36.0418	4
35.6978	4	36.0235	35.5767	35.6334		35.5779	5	36.3297	35.9057	35.9149		32.0841	5	32.2916	32.2149	32.2328		34.3582	5	34.2027	34.1698	34.3324		34.4156	4	34.7735	34.3516	34.3829		34.8998	6	34.8048	34.9712	35.0023		33.7373	5	34.1102	33.9497	33.9667		34.8459	5	35.7427	35.2443	35.2092		36.0316	4
35.6826	4	36.0241	35.5767	35.6334		35.5765	5	36.3188	35.8944	35.9025		32.0872	5	32.2878	32.2111	32.2299		34.343	5	34.1978	34.1645	34.3277		34.4011	4	34.7739	34.3515	34.3826		34.8849	6	34.8108	34.9822	35.0124		33.7363	5	34.1073	33.9468	33.9639		34.8498	5	35.7365	35.2376	35.2025		36.03	4
35.6648	4	36.0247	35.5767	35.6333		35.5617	4	36.3213	35.8978	35.9062		32.0853	5	32.2839	32.2073	32.227		34.514	5	34.1929	34.1594	34.3231		34.375	4	34.7744	34.3513	34.3822		34.8923	6	34.8169	34.9932	35.0223		33.7354	5	34.1043	33.9438	33.961		34.8568	5	35.7303	35.2309	35.1958		36.0396	4
35.6564	4	36.0252	35.5767	35.6333		35.5305	5	36.3106	35.8865	35.8939		32.0824	5	32.2801	32.2035	32.2242		34.362	5	34.1881	34.1542	34.3184		34.3577	4	34.7749	34.3511	34.3819		34.9066	6	34.8229	35.004	35.0322		33.74	5	34.1014	33.9409	33.9581		34.8629	5	35.7242	35.2243	35.1891		36.0469	4
35.6421	4	36.0258	35.5767	35.6333		35.5004	5	36.2998	35.8753	35.8817		32.0826	5	32.2763	32.1998	32.2214		34.3419	5	34.1833	34.1492	34.3139		34.3405	4	34.7753	34.351	34.3816		34.9346	6	34.8289	35.0146	35.0419		33.7458	5	34.0985	33.938	33.9553		34.8606	5	35.718	35.2177	35.1826		36.0433	4
35.6253	4	36.0264	35.5767	35.6333		35.4883	5	36.2892	35.8641	35.8697		32.0831	5	32.2725	32.1961	32.2186		34.3297	5	34.1786	34.1441	34.3093		34.3219	4	34.7758	34.3508	34.3813		34.97	6	34.8349	35.0251	35.0515		33.7465	5	34.0956	33.9352	33.9525		34.8618	5	35.7119	35.2112	35.176		36.0395	4
35.6045	4	36.0269	35.5767	35.6333		35.4809	5	36.2785	35.8531	35.8577		32.0862	5	32.2687	32.1924	32.2159		34.3201	5	34.1738	34.1391	34.3048		34.297	4	34.7763	34.3507	34.3809		35.0002	6	34.8408	35.0355	35.0611		33.7458	5	34.0928	33.9323	33.9497		34.8671	5	35.7058	35.2046	35.1695		36.0286	4
35.5804	4	36.0275	35.5767	35.6332		35.4731	5	36.2679	35.8421	35.8459		32.0949	5	32.2649	32.1887	32.2132		34.3162	5	34.1691	34.1341	34.3003		34.2801	4	34.7767	34.3505	34.3806		35.0266	6	34.8467	35.0457	35.0705		33.7435	5	34.0899	33.9295	33.9469		34.8694	4	35.709	35.2105	35.1753		36.0203	4
35.5592	4	36.0281	35.5767	35.6332		35.4702	5	36.2574	35.8313	35.8342		32.0988	5	32.2612	32.1851	32.2105		34.3147	5	34.1645	34.1292	34.2959		34.2644	4	34.7772	34.3504	34.3802		35.0493	6	34.8527	35.0558	35.0799		33.7406	5	34.0871	33.9267	33.9442		34.8559	5	35.7029	35.2039	35.1688		36.0152	4
35.5371	4	36.0286	35.5767	35.6332		35.4699	5	36.2469	35.8205	35.8227		32.0935	5	32.2575	32.1815	32.2079		34.3236	4	34.1741	34.1396	34.305		34.2616	4	34.7776	34.3502	34.3799		35.0597	6	34.8586	35.0658	35.0891		33.7391	5	34.0843	33.9239	33.9415		34.8543	5	35.6968	35.1974	35.1623		36.0082	4
35.5145	4	36.0292	35.5767	35.6332		35.4636	5	36.2364	35.8098	35.8112		32.0902	5	32.2538	32.1779	32.2053		34.2192	5	34.1695	34.1347	34.3005		34.2584	4	34.7781	34.3501	34.3796		35.0596	6	34.8645	35.0757	35.0983		33.7373	5	34.0815	33.9211	33.9387		34.8536	5	35.6907	35.191	35.1559		35.9975	4
35.5014	4	36.0297	35.5767	35.6331		35.4614	5	36.226	35.7992	35.7999		32.0887	5	32.2501	32.1744	32.2027		34.2389	5	34.1648	34.1297	34.296		34.2458	4	34.7785	34.3499	34.3792		35.054	6	34.8703	35.0854	35.1073		33.7375	5	34.0787	33.9184	33.9361		34.8557	5	35.6847	35.1846	35.1496		35.9928	4
35.4863	4	36.0303	35.5767	35.6331		35.4538	5	36.2156	35.7887	35.7888		32.0853	5	32.2464	32.1708	32.2002		34.2741	5	34.1602	34.1248	34.2916		34.2301	4	34.779	34.3498	34.3789		35.0575	6	34.8762	35.095	35.1163		33.7409	5	34.076	33.9157	33.9334		34.8603	5	35.6786	35.1782	35.1433		35.9856	4
35.4727	4	36.0308	35.5767	35.6331		35.4391	5	36.2053	35.7782	35.7777		32.0816	5	32.2428	32.1673	32.1977		34.2796	5	34.1556	34.12	34.2873		34.2312	4	34.7794	34.3496	34.3786		35.0697	6	34.882	35.1045	35.1251		33.7444	5	34.0732	33.913	33.9307		34.8609	5	35.6726	35.1718	35.137		35.9769	4
35.4523	4	36.0314	35.5767	35.6331		35.4255	5	36.195	35.7679	35.7667		32.0746	5	32.2392	32.1639	32.1952		34.2805	5	34.151	34.1152	34.2829		34.233	4	34.7799	34.3495	34.3782		35.0849	6	34.8878	35.1138	35.1339		33.7501	5	34.0705	33.9103	33.9281		34.865	5	35.6666	35.1655	35.1308		35.9713	4
35.4411	4	36.0319	35.5767	35.633		35.4144	5	36.1848	35.7576	35.7559		32.073	5	32.2355	32.1604	32.1928		34.2902	6	34.1607	34.1256	34.2921		34.2225	4	34.7803	34.3493	34.3779		35.0934	6	34.8936	35.1231	35.1426		33.7554	5	34.0678	33.9076	33.9254		34.8755	4	35.6699	35.1715	35.1368		35.9627	4
35.4288	4	36.0324	35.5767	35.633		35.4095	5	36.1746	35.7474	35.7452		32.0716	5	32.2319	32.157	32.1904		34.3009	6	34.1704	34.1361	34.3012		34.2083	4	34.7808	34.3492	34.3775		35.1067	6	34.8994	35.1322	35.1512		33.7585	5	34.0652	33.905	33.9228		34.8586	5	35.6639	35.1652	35.1306		35.9555	4
35.4097	4	36.033	35.5767	35.633		35.4091	5	36.1644	35.7373	35.7346		32.0727	5	32.2284	32.1536	32.188		34.3069	6	34.18	34.1464	34.3102		34.2026	4	34.7812	34.349	34.3772		35.1119	6	34.9051	35.1412	35.1597		33.7672	6	34.0746	33.9164	33.9347		34.8555	5	35.6579	35.1589	35.1244		35.9532	4
35.3934	4	36.0335	35.5767	35.6329		35.4074	5	36.1543	35.7273	35.7241		32.0761	5	32.2248	32.1502	32.1856		34.3152	6	34.1896	34.1567	34.3192		34.1917	4	34.7817	34.3489	34.3769		35.1261	6	34.9109	35.1501	35.1681		33.7822	6	34.0841	33.9278	33.9464		34.8572	5	35.6519	35.1527	35.1182		35.9515	4
35.3813	4	36.0341	35.5767	35.6329		35.406	5	36.1443	35.7174	35.7138		32.0764	5	32.2213	32.1469	32.1833		34.3448	6	34.1992	34.1669	34.3282		34.1885	4	34.7821	34.3488	34.3765		35.1392	6	34.9166	35.1589	35.1764		33.7911	4	34.0935	33.9391	33.9581		34.8566	5	35.646	35.1464	35.1121		35.9507	4
35.3696	4	36.0346	35.5767	35.6329		35.396	5	36.1342	35.7075	35.7035		32.0762	5	32.2177	32.1435	32.181		34.3895	6	34.2087	34.1771	34.3371		34.1866	4	34.7825	34.3486	34.3762		35.1453	6	34.9223	35.1675	35.1846		33.7861	4	34.1029	33.9503	33.9696		34.8564	5	35.64	35.1402	35.1061		35.9435	4
35.3623	4	36.0351	35.5767	35.6328		35.3842	5	36.1243	35.6978	35.6934		32.0768	5	32.2142	32.1402	32.1787		34.4484	6	34.2182	34.1873	34.3459		34.1713	4	34.783	34.3485	34.3758		35.1474	6	34.928	35.1761	35.1928		33.7768	5	34.1	33.9473	33.9667		34.8634	5	35.6341	35.1341	35.1001		35.9474	4
35.3594	4	36.0357	35.5767	35.6328		35.3699	5	36.1143	35.6881	35.6833		32.0745	5	32.2107	32.137	32.1765		34.5112	6	34.2276	34.1974	34.3548		34.1607	4	34.7834	34.3483	34.3755		35.149	6	34.9337	35.1846	35.2008		33.7707	5	34.0971	33.9444	33.9637		34.8634	5	35.6282	35.128	35.0941		35.9397	4
35.3586	4	36.0362	35.5767	35.6328		35.36	5	36.1044	35.6785	35.6734		32.0714	5	32.2073	32.1337	32.1742		34.5511	6	34.237	34.2074	34.3635		34.1526	4	34.7839	34.3482	34.3751		35.1529	6	34.9393	35.1929	35.2088		33.7638	5	34.0942	33.9414	33.9608		34.8694	5	35.6223	35.1219	35.0881		35.9418	4
35.3638	4	36.0367	35.5767	35.6327		35.3534	5	36.0946	35.669	35.6635		32.0622	5	32.2038	32.1305	32.172		34.6143	6	34.2464	34.2174	34.3722		34.1468	4	34.7843	34.3481	34.3748		35.1618	6	34.945	35.2011	35.2167		33.7605	5	34.0913	33.9385	33.9579		34.8759	5	35.6164	35.1158	35.0822		35.9398	4
35.3669	4	36.0372	35.5767	35.6327		35.3509	5	36.0847	35.6596	35.6538		32.0543	5	32.2004	32.1273	32.1699		34.6629	6	34.2557	34.2273	34.3809		34.1476	4	34.7847	34.3479	34.3744		35.1641	6	34.9506	35.2093	35.2245		33.7591	5	34.0885	33.9356	33.955		34.8812	5	35.6106	35.1098	35.0764		35.9402	4
35.367	4	36.0378	35.5767	35.6327		35.3499	5	36.075	35.6503	35.6442		32.0522	5	32.1969	32.1241	32.1677		34.697	6	34.265	34.2372	34.3895		34.1527	4	34.7851	34.3478	34.3741		35.1753	4	34.9562	35.2173	35.2322		33.7636	5	34.0857	33.9327	33.9521		34.8858	5	35.6047	35.1038	35.0705		35.9334	4
35.3685	4	36.0383	35.5766	35.6326		35.3452	5	36.0652	35.641	35.6347		32.047	5	32.1935	32.121	32.1656		34.7223	6	34.2743	34.247	34.3981		34.1612	4	34.7856	34.3477	34.3737		35.1891	4	34.9618	35.2252	35.2399		33.7648	5	34.0829	33.9299	33.9493		34.8796	5	35.5989	35.0978	35.0647		35.928	4
35.375	4	36.0388	35.5766	35.6326		35.3365	4	36.0685	35.646	35.6397		32.0377	5	32.1901	32.1178	32.1635		34.7364	6	34.2835	34.2568	34.4067		34.1595	4	34.786	34.3476	34.3734		35.1899	4	34.9673	35.233	35.2474		33.7755	5	34.0801	33.927	33.9465		34.8691	5	35.5931	35.0919	35.059		35.9289	4
35.3558	4	36.0393	35.5766	35.6325		35.3184	5	36.0588	35.6368	35.6302		32.0284	5	32.1868	32.1147	32.1614		34.7513	6	34.2927	34.2665	34.4152		34.156	4	34.7864	34.3474	34.373		35.1665	4	34.9729	35.2407	35.2549		33.7795	5	34.0774	33.9242	33.9437		34.8594	5	35.5873	35.086	35.0533		35.9279	4
35.3458	4	36.0398	35.5766	35.6325		35.294	5	36.0492	35.6277	35.6208		32.0207	5	32.1834	32.1117	32.1594		34.7773	6	34.3019	34.2762	34.4236		34.1441	4	34.7868	34.3473	34.3726		35.1323	4	34.9784	35.2483	35.2623		33.7783	5	34.0746	33.9214	33.9409		34.8526	5	35.5815	35.0801	35.0476		35.9245	4
35.3468	4	36.0404	35.5766	35.6324		35.2818	5	36.0395	35.6186	35.6116		32.0186	5	32.1801	32.1086	32.1573		34.7703	6	34.311	34.2858	34.432		34.1488	4	34.7873	34.3472	34.3723		35.0939	4	34.9839	35.2558	35.2697		33.7774	5	34.0719	33.9186	33.9381		34.8503	5	35.5757	35.0743	35.042		35.9243	4
35.3456	4	36.0409	35.5766	35.6324		35.271	5	36.03	35.6097	35.6024		32.0175	5	32.1767	32.1056	32.1553		34.7575	6	34.3201	34.2954	34.4404		34.136	4	34.7877	34.347	34.3719		35.0531	4	34.9894	35.2632	35.2769		33.7741	5	34.0692	33.9159	33.9353		34.843	5	35.5699	35.0685	35.0364		35.9293	4
35.341	4	36.0414	35.5765	35.6324		35.2645	5	36.0204	35.6008	35.5933		32.023	5	32.1734	32.1026	32.1534		34.7459	6	34.3292	34.3049	34.4487		34.1209	4	34.7881	34.3469	34.3716		35.0223	4	34.9949	35.2705	35.2841		33.7741	5	34.0665	33.9131	33.9326		34.8411	5	35.5642	35.0627	35.0308		35.923	4
35.3406	4	36.0419	35.5765	35.6323		35.2595	5	36.0109	35.592	35.5844		32.0324	5	32.1701	32.0996	32.1514		34.7506	6	34.3382	34.3144	34.4569		34.1119	4	34.7885	34.3468	34.3712		34.9918	5	34.9906	35.263	35.2761		33.7753	5	34.0638	33.9104	33.9299		34.841	5	35.5585	35.057	35.0253		35.9162	4
35.3308	4	36.0424	35.5765	35.6323		35.2537	5	36.0014	35.5832	35.5755		32.0378	5	32.1668	32.0967	32.1495		34.7413	6	34.3472	34.3239	34.4652		34.0923	4	34.7889	34.3467	34.3709		34.9731	5	34.9862	35.2556	35.2681		33.78	5	34.0612	33.9077	33.9272		34.8464	5	35.5528	35.0512	35.0199		35.9188	4
35.3278	4	36.0429	35.5765	35.6322		35.251	5	35.992	35.5746	35.5667		32.0371	5	32.1636	32.0938	32.1476		34.7385	6	34.3561	34.3332	34.4734		34.0745	4	34.7893	34.3465	34.3705		34.9647	5	34.9819	35.2481	35.2602		33.7767	5	34.0585	33.905	33.9245		34.8478	5	35.5471	35.0456	35.0145		35.9116	4
35.3216	4	36.0434	35.5764	35.6322		35.2496	5	35.9826	35.566	35.558		32.0347	5	32.1603	32.0909	32.1457		34.7464	6	34.365	34.3426	34.4815		34.06	4	34.7898	34.3464	34.3702		34.9499	5	34.9776	35.2407	35.2523		33.7732	5	34.0559	33.9023	33.9219		34.8549	5	35.5414	35.0399	35.0091		35.9056	4
35.3192	4	36.0439	35.5764	35.6321		35.2478	5	35.9733	35.5575	35.5494		32.0333	5	32.1571	32.088	32.1438		34.7517	6	34.3739	34.3519	34.4896		34.055	4	34.7902	34.3463	34.3698		34.9336	5	34.9732	35.2333	35.2445		33.7693	5	34.0533	33.8997	33.9192		34.861	5	35.5357	35.0343	35.0037		35.9032	4
35.3165	4	36.0444	35.5764	35.6321		35.2488	5	35.964	35.5491	35.5409		32.0294	6	32.164	32.0967	32.1508		34.757	6	34.3828	34.3611	34.4977		34.0464	4	34.7906	34.3462	34.3695		34.9219	5	34.9689	35.2259	35.2367		33.7621	5	34.0507	33.897	33.9166		34.8618	6	35.5394	35.0412	35.0107		35.9165	4
35.3133	4	36.0449	35.5764	35.6321		35.2485	5	35.9547	35.5408	35.5325		32.0309	6	32.1709	32.1054	32.1577		34.7608	6	34.3916	34.3703	34.5057		34.0441	4	34.791	34.3461	34.3692		34.9125	5	34.9646	35.2185	35.229		33.7532	5	34.0481	33.8944	33.914		34.86	6	35.543	35.0481	35.0175		35.9157	4
35.3204	4	36.0454	35.5763	35.632		35.2392	5	35.9455	35.5325	35.5242		32.0343	6	32.1778	32.114	32.1646		34.758	6	34.4004	34.3795	34.5137		34.0509	4	34.7914	34.346	34.3689		34.9173	5	34.9603	35.2111	35.2214		33.7496	5	34.0456	33.8918	33.9114		34.8567	4	35.5466	35.0549	35.0244		35.9047	4
35.3199	4	36.0459	35.5763	35.632		35.2211	5	35.9363	35.5243	35.516		32.0366	6	32.1847	32.1225	32.1715		34.7531	6	34.4091	34.3886	34.5216		34.047	4	34.7918	34.3459	34.3685		34.9203	5	34.956	35.2038	35.2138		33.7474	5	34.0431	33.8892	33.9088		34.8477	5	35.541	35.0492	35.0189		35.8995	4
35.3194	4	36.0464	35.5762	35.6319		35.2066	4	35.94	35.53	35.5215		32.0556	6	32.1915	32.131	32.1783		34.7643	6	34.4178	34.3977	34.5295		34.0411	4	34.7922	34.3458	34.3682		34.9106	4	34.9616	35.2119	35.2216		33.744	5	34.0405	33.8866	33.9063		34.8464	5	35.5353	35.0435	35.0135		35.8988	4
35.3356	4	36.0469	35.5762	35.6319		35.1907	5	35.9309	35.5218	35.5133		32.0877	6	32.1983	32.1394	32.1851		34.7682	6	34.4265	34.4067	34.5373		34.0478	4	34.7926	34.3457	34.3679		34.8962	5	34.9573	35.2046	35.214		33.7444	5	34.038	33.8841	33.9037		34.8464	5	35.5296	35.0378	35.0082		35.8802	4
35.3372	4	36.0474	35.5762	35.6318		35.1626	5	35.9217	35.5137	35.5051		32.1309	6	32.2051	32.1478	32.1918		34.7665	6	34.4351	34.4156	34.5451		34.0474	4	34.793	34.3456	34.3676		34.8912	5	34.953	35.1973	35.2064		33.7489	5	34.0356	33.8815	33.9012		34.8459	5	35.524	35.0322	35.0028		35.8659	4
35.3185	4	36.0479	35.5761	35.6318		35.1494	5	35.9127	35.5057	35.4971		32.1724	6	32.2119	32.1561	32.1985		34.7602	6	34.4438	34.4246	34.5529		34.0387	4	34.7934	34.3455	34.3673		34.8905	5	34.9487	35.19	35.1989		33.7535	5	34.0331	33.879	33.8987		34.8384	5	35.5184	35.0266	34.9976		35.8573	4
35.3007	4	36.0484	35.5761	35.6318		35.1474	5	35.9036	35.4977	35.4891		32.1998	4	32.2186	32.1644	32.2052		34.7594	6	34.4523	34.4334	34.5606		34.0281	4	34.7938	34.3454	34.367		34.9014	5	34.9444	35.1827	35.1914		33.7512	5	34.0306	33.8765	33.8962		34.8378	6	35.5221	35.0336	35.0045		35.8583	4
35.2968	4	36.0488	35.576	35.6317		35.1477	4	35.9074	35.5036	35.4948		32.2025	4	32.2253	32.1726	32.2118		34.7546	6	34.4609	34.4423	34.5683		34.0265	4	34.7942	34.3453	34.3666		34.9106	5	34.9401	35.1754	35.184		33.746	5	34.0282	33.874	33.8937		34.8456	6	35.5258	35.0405	35.0115		35.8738	4
35.3071	4	36.0493	35.576	35.6317		35.1496	5	35.8984	35.4957	35.4868		32.1832	4	32.232	32.1807	32.2184		34.7439	6	34.4694	34.4511	34.5759		34.0262	4	34.7946	34.3452	34.3663		34.9144	5	34.9358	35.1681	35.1766		33.7453	5	34.0258	33.8715	33.8913		34.8559	6	35.5295	35.0473	35.0184		35.8747	4
35.3159	4	36.0498	35.5759	35.6316		35.1435	5	35.8894	35.4878	35.479		32.1594	4	32.2387	32.1888	32.225		34.7382	6	34.4779	34.4598	34.5835		34.0259	4	34.795	34.3451	34.366		34.9205	5	34.9315	35.1609	35.1693		33.7419	5	34.0234	33.8691	33.8888		34.8715	6	35.5331	35.0541	35.0252		35.8684	4
35.3242	4	36.0503	35.5759	35.6316		35.1392	5	35.8804	35.48	35.4712		32.1376	4	32.2453	32.1969	32.2315		34.7379	6	34.4863	34.4685	34.5911		34.0386	4	34.7954	34.345	34.3657		34.9171	5	34.9273	35.1536	35.162		33.7343	5	34.021	33.8666	33.8864		34.894	6	35.5368	35.0609	35.032		35.8648	4
35.3293	4	36.0508	35.5758	35.6315		35.1389	5	35.8715	35.4723	35.4635		32.1193	5	32.2417	32.1932	32.2284		34.7241	6	34.4947	34.4772	34.5986		34.0632	4	34.7958	34.345	34.3654		34.9172	5	34.923	35.1464	35.1548		33.7295	5	34.0186	33.8642	33.884		34.9189	6	35.5405	35.0675	35.0387		35.8762	4
35.3218	4	36.0513	35.5758	35.6315		35.1343	5	35.8627	35.4646	35.4559		32.1019	5	32.2381	32.1895	32.2253		34.6966	6	34.5031	34.4858	34.6061		34.0893	4	34.7961	34.3449	34.365		34.9161	5	34.9188	35.1392	35.1476		33.7222	5	34.0163	33.8618	33.8816		34.9464	6	35.5441	35.0742	35.0455		35.8829	4
35.3256	4	36.0517	35.5757	35.6315		35.1217	5	35.8538	35.457	35.4483		32.0861	5	32.2345	32.1859	32.2222		34.6935	4	34.5115	34.4943	34.6135		34.1026	4	34.7965	34.3448	34.3647		34.917	5	34.9145	35.132	35.1404		33.7218	5	34.0139	33.8594	33.8792		34.9764	6	35.5477	35.0808	35.0521		35.8894	4
35.3171	4	36.0522	35.5757	35.6314		35.1107	5	35.845	35.4495	35.4409		32.0692	5	32.2309	32.1823	32.2191		34.6636	4	34.5198	34.5028	34.6209		34.1114	4	34.7969	34.3447	34.3644		34.9126	5	34.9103	35.1249	35.1334		33.7235	5	34.0116	33.857	33.8769		35.0104	6	35.5514	35.0873	35.0587		35.896	4
35.3174	4	36.0527	35.5756	35.6314		35.1009	5	35.8363	35.4421	35.4335		32.056	5	32.2273	32.1787	32.2161		34.6282	4	34.5281	34.5113	34.6282		34.1139	4	34.7973	34.3447	34.364		34.8909	5	34.906	35.1177	35.1263		33.7244	5	34.0093	33.8546	33.8745		35.0431	6	35.555	35.0938	35.0653		35.8964	4
35.3179	4	36.0531	35.5756	35.6313		35.0925	5	35.8275	35.4347	35.4262		32.0432	5	32.2237	32.1752	32.2131		34.5905	4	34.5363	34.5197	34.6355		34.1262	4	34.7977	34.3446	34.3637		34.871	5	34.9018	35.1106	35.1193		33.7272	5	34.007	33.8523	33.8722		35.075	6	35.5586	35.1002	35.0718		35.9016	4
35.3234	4	36.0536	35.5755	35.6313		35.0878	5	35.8189	35.4274	35.4189		32.0348	5	32.2202	32.1717	32.2102		34.5564	5	34.5292	34.5115	34.6275		34.1176	4	34.7981	34.3445	34.3634		34.8625	5	34.8976	35.1035	35.1123		33.7337	5	34.0047	33.85	33.8699		35.1013	6	35.5622	35.1066	35.0783		35.9048	4
35.3235	4	36.0541	35.5754	35.6312		35.0801	5	35.8102	35.4201	35.4118		32.0353	5	32.2167	32.1682	32.2073		34.5295	5	34.522	34.5034	34.6196		34.0827	5	34.78	34.3262	34.3443		34.8674	5	34.8934	35.0964	35.1054		33.7382	5	34.0024	33.8476	33.8676		35.1226	6	35.5657	35.1129	35.0847		35.8951	4
35.3272	4	36.0546	35.5754	35.6312		35.0665	5	35.8016	35.4129	35.4047		32.0309	5	32.2132	32.1647	32.2044		34.4958	5	34.5149	34.4953	34.6118		34.0409	5	34.762	34.308	34.3254		34.8665	5	34.8892	35.0893	35.0986		33.7399	5	34.0002	33.8453	33.8653		35.1377	6	35.5693	35.1192	35.0911		35.8717	4
35.3341	4	36.055	35.5753	35.6311		35.0546	5	35.793	35.4058	35.3977		32.0211	5	32.2097	32.1613	32.2016		34.4828	4	34.5232	34.5038	34.6192		34.0065	5	34.7441	34.29	34.3067		34.8646	5	34.885	35.0822	35.0917		33.7391	5	33.998	33.843	33.863		35.1436	6	35.5729	35.1255	35.0975		35.8543	4
35.3554	4	36.0555	35.5752	35.6311		35.0495	5	35.7845	35.3988	35.3908		32.0109	5	32.2062	32.1578	32.1988		34.4734	5	34.5161	34.4958	34.6113		33.9721	5	34.7264	34.2722	34.2882		34.8607	5	34.8808	35.0752	35.0849		33.7373	5	33.9957	33.8408	33.8608		35.1602	6	35.5764	35.1317	35.1038		35.8404	4
35.3558	4	36.0559	35.5752	35.631		35.0362	5	35.776	35.3918	35.3839		32.0043	5	32.2028	32.1544	32.196		34.4622	5	34.5091	34.4877	34.6035		33.9429	5	34.7087	34.2546	34.2699		34.8559	5	34.8766	35.0682	35.0782		33.7373	5	33.9935	33.8385	33.8586		35.1835	6	35.5799	35.1378	35.11		35.8246	4
35.3262	5	36.0426	35.5522	35.6041		35.0195	5	35.7675	35.3848	35.3771		31.9917	5	32.1993	32.1511	32.1933		34.4481	5	34.5021	34.4798	34.5959		33.9201	4	34.7095	34.255	34.2701		34.8523	5	34.8724	35.0612	35.0715		33.7373	5	33.9913	33.8362	33.8563		35.2154	6	35.5835	35.1439	35.1163		35.8194	4
35.3055	5	36.0293	35.5296	35.5776		35.0077	5	35.7591	35.3779	35.3704		31.9775	5	32.1959	32.1477	32.1906		34.428	5	34.4951	34.4719	34.5883		33.8959	5	34.6919	34.2375	34.2519		34.8524	5	34.8682	35.0542	35.0649		33.74	5	33.9892	33.834	33.8541		35.2259	4	35.587	35.15	35.1225		35.8176	4
35.2788	5	36.0161	35.5073	35.5515		35.0022	5	35.7507	35.3711	35.3638		31.9646	5	32.1925	32.1444	32.1879		34.4235	4	34.5035	34.4805	34.5958		33.8764	5	34.6745	34.2201	34.234		34.8612	5	34.864	35.0472	35.0583		33.7463	5	33.987	33.8318	33.8519		35.204	4	35.5905	35.156	35.1286		35.8166	4
35.2549	5	36.0029	35.4854	35.5259		34.9999	5	35.7423	35.3643	35.3572		31.9538	5	32.1891	32.1411	32.1853		34.4069	4	34.5118	34.4891	34.6032		33.8617	5	34.6572	34.203	34.2162		34.8733	5	34.8598	35.0402	35.0517		33.7482	5	33.9849	33.8296	33.8498		35.1656	4	35.594	35.162	35.1347		35.8186	4
35.2388	4	36.0036	35.4858	35.5264		34.9993	5	35.734	35.3576	35.3507		31.9513	5	32.1857	32.1378	32.1827		34.3962	4	34.5202	34.4977	34.6107		33.8506	4	34.6581	34.2037	34.2166		34.885	5	34.8557	35.0333	35.0452		33.7473	5	33.9827	33.8274	33.8476		35.128	4	35.5975	35.1679	35.1408		35.8248	4
35.2143	5	35.9905	35.4642	35.5012		35.0005	5	35.7257	35.3509	35.3443		31.9498	5	32.1824	32.1346	32.1801		34.3903	5	34.5131	34.4896	34.6029		33.8309	5	34.6409	34.1866	34.199		34.9002	5	34.8515	35.0263	35.0387		33.7482	5	33.9806	33.8252	33.8454		35.096	5	35.5917	35.1614	35.1346		35.8194	4
35.1961	5	35.9775	35.4429	35.4765		35.0017	5	35.7174	35.3443	35.3379		31.9497	5	32.179	32.1314	32.1776		34.3888	5	34.5061	34.4817	34.5952		33.8206	5	34.6238	34.1698	34.1816		34.9092	4	34.8574	35.0371	35.0483		33.7537	5	33.9785	33.823	33.8433		35.0705	5	35.5859	35.155	35.1284		35.8191	4
35.1799	5	35.9646	35.4218	35.4522		34.9983	5	35.7092	35.3377	35.3316		31.9513	5	32.1757	32.1282	32.1751		34.3907	5	34.4991	34.4738	34.5876		33.8135	5	34.6068	34.1531	34.1644		34.9066	5	34.8533	35.0302	35.0418		33.7629	6	33.9883	33.8349	33.8555		35.0541	5	35.5801	35.1487	35.1223		35.8235	4
35.1685	5	35.9517	35.4011	35.4283		34.9949	5	35.701	35.3312	35.3253		31.9382	5	32.1724	32.125	32.1727		34.3962	5	34.4921	34.4659	34.5801		33.8081	5	34.59	34.1365	34.1473		34.9142	4	34.8592	35.0409	35.0514		33.7768	6	33.9981	33.8466	33.8677		35.0395	5	35.5743	35.1423	35.1162		35.8249	4
35.1526	5	35.9389	35.3807	35.4049		34.9937	5	35.6929	35.3247	35.3192		31.9188	4	32.1793	32.1334	32.1795		34.3925	5	34.4853	34.4582	34.5726		33.8068	5	34.5732	34.1201	34.1304		34.9287	5	34.855	35.034	35.0449		33.7988	6	34.0079	33.8583	33.8797		35.0336	5	35.5686	35.136	35.1102		35.8298	4
35.1328	5	35.9262	35.3606	35.3818		34.9902	5	35.6848	35.3183	35.313		31.9098	5	32.176	32.1302	32.177		34.3899	5	34.4784	34.4504	34.5653		33.7987	5	34.5565	34.1039	34.1136		34.9435	5	34.8508	35.0271	35.0384		33.8247	6	34.0176	33.8699	33.8917		35.031	5	35.5628	35.1297	35.1042		35.8318	4
35.1178	5	35.9135	35.3408	35.3592		34.9863	5	35.6767	35.312	35.307		31.904	4	32.1828	32.1386	32.1837		34.3916	5	34.4716	34.4428	34.558		33.7877	5	34.54	34.0878	34.097		34.9571	5	34.8467	35.0201	35.0319		33.8451	6	34.0272	33.8814	33.9036		35.0372	4	35.5664	35.1358	35.1105		35.8497	4
35.1067	5	35.9009	35.3213	35.3369		34.9855	5	35.6686	35.3056	35.301		31.9067	4	32.1897	32.147	32.1905		34.3872	5	34.4649	34.4352	34.5507		33.7798	5	34.5235	34.0718	34.0806		34.9808	5	34.8425	35.0132	35.0255		33.8814	6	34.0369	33.8928	33.9154		35.0246	5	35.5607	35.1295	35.1045		35.8546	4
35.0962	5	35.8884	35.302	35.3151		34.9877	5	35.6606	35.2993	35.2951		31.9186	4	32.1965	32.1552	32.1971		34.3789	5	34.4582	34.4277	34.5436		33.7776	5	34.5072	34.056	34.0644		35.0019	5	34.8384	35.0064	35.0192		33.9191	6	34.0465	33.9042	33.9271		35.0167	5	35.5549	35.1233	35.0985		35.8539	4
35.0864	5	35.8759	35.2831	35.2936		34.9907	4	35.6652	35.3064	35.3016		31.9375	4	32.2033	32.1634	32.2038		34.3783	5	34.4515	34.4203	34.5365		33.7745	5	34.4909	34.0404	34.0483		35.0176	5	34.8342	34.9995	35.0129		33.9613	4	34.056	33.9155	33.9387		35.0157	5	35.5492	35.1171	35.0926		35.8578	4
35.0796	5	35.8636	35.2644	35.2725		34.9824	4	35.6697	35.3134	35.3081		31.957	4	32.2101	32.1716	32.2104		34.3855	5	34.4449	34.4129	34.5295		33.7757	5	34.4748	34.0249	34.0324		35.0252	5	34.8301	34.9926	35.0066		33.966	4	34.0655	33.9267	33.9503		35.0282	5	35.5435	35.1109	35.0867		35.882	4
35.0589	5	35.8512	35.246	35.2517		34.9623	4	35.6742	35.3204	35.3145		31.9805	4	32.2168	32.1797	32.217		34.3764	5	34.4384	34.4055	34.5225		33.7735	5	34.4588	34.0096	34.0167		35.0337	5	34.826	34.9858	35.0003		33.9515	4	34.075	33.9379	33.9617		35.0357	5	35.5379	35.1047	35.0809		35.909	4
35.0388	5	35.839	35.2278	35.2314		34.9408	4	35.6788	35.3273	35.321		31.9943	4	32.2235	32.1877	32.2235		34.368	5	34.4319	34.3983	34.5156		33.7661	4	34.4604	34.0113	34.0181		35.049	5	34.8219	34.979	34.9942		33.9329	5	34.0723	33.9348	33.9587		35.0451	5	35.5322	35.0986	35.0751		35.9242	4
35.0311	5	35.8268	35.2099	35.2113		34.9194	5	35.6707	35.3208	35.3148		32.005	4	32.2302	32.1957	32.2301		34.3667	5	34.4254	34.3911	34.5088		33.7557	5	34.4445	33.996	34.0024		35.062	5	34.8177	34.9722	34.988		33.9095	5	34.0696	33.9317	33.9556		35.0569	4	35.5359	35.1049	35.0816		35.9361	4
35.0243	5	35.8147	35.1923	35.1916		34.9051	5	35.6627	35.3143	35.3087		32.0068	5	32.2267	32.1919	32.2269		34.3633	5	34.419	34.3839	34.5021		33.7457	5	34.4286	33.981	33.9869		35.0757	5	34.8136	34.9654	34.9819		33.8899	5	34.0669	33.9287	33.9526		35.0442	5	35.5302	35.0988	35.0758		35.9455	4
35.0157	5	35.8026	35.175	35.1723		34.9014	5	35.6547	35.3079	35.3026		31.9916	5	32.2231	32.1881	32.2237		34.3685	5	34.4126	34.3768	34.4954		33.7416	4	34.4304	33.9828	33.9884		35.0814	5	34.8095	34.9586	34.9758		33.8797	5	34.0642	33.9257	33.9495		35.0404	5	35.5246	35.0927	35.07		35.9458	4
35.0109	5	35.7906	35.1579	35.1533		34.9032	4	35.6593	35.3149	35.3091		31.9795	5	32.2196	32.1844	32.2206		34.3567	5	34.4062	34.3698	34.4888		33.7372	5	34.4146	33.9679	33.9731		35.0886	5	34.8054	34.9519	34.9698		33.8731	5	34.0616	33.9227	33.9465		35.0461	5	35.5189	35.0866	35.0643		35.9377	4
35.002	5	35.7787	35.141	35.1346		34.8936	5	35.6513	35.3085	35.3031		31.9669	5	32.216	32.1806	32.2176		34.3506	4	34.415	34.3789	34.4968		33.73	5	34.399	33.9531	33.9579		35.0969	5	34.8013	34.9451	34.9638		33.8664	5	34.0589	33.9198	33.9436		35.0566	5	35.5133	35.0806	35.0586		35.9248	4
34.9899	5	35.7668	35.1244	35.1163		34.8873	5	35.6433	35.3021	35.2971		31.9607	5	32.2125	32.1769	32.2145		34.3388	4	34.4237	34.388	34.5048		33.7287	5	34.3834	33.9384	33.9428		35.1098	4	34.8074	34.9572	34.9743		33.8568	5	34.0563	33.9168	33.9406		35.064	5	35.5077	35.0746	35.0529		35.9127	4
34.9779	5	35.755	35.108	35.0982		34.8835	5	35.6354	35.2958	35.2911		31.9563	5	32.2091	32.1733	32.2115		34.3321	4	34.4323	34.397	34.5127		33.7262	5	34.368	33.9239	33.9278		35.109	5	34.8033	34.9504	34.9682		33.852	5	34.0537	33.9139	33.9377		35.0707	5	35.5022	35.0686	35.0473		35.9087	4
34.9653	5	35.7433	35.0919	35.0805		34.8834	5	35.6276	35.2895	35.2852		31.9497	5	32.2056	32.1696	32.2086		34.3258	5	34.4258	34.3898	34.506		33.7246	5	34.3526	33.9095	33.9131		35.1099	5	34.7992	34.9437	34.9623		33.8461	5	34.0511	33.911	33.9348		35.0725	4	35.5059	35.0751	35.054		35.9021	4
34.9597	5	35.7316	35.076	35.0631		34.881	5	35.6197	35.2833	35.2794		31.9493	5	32.2021	32.166	32.2056		34.3183	5	34.4194	34.3827	34.4993		33.7231	5	34.3373	33.8952	33.8984		35.129	5	34.7951	34.9369	34.9563		33.8401	5	34.0485	33.9081	33.9319		35.0653	5	35.5003	35.0692	35.0483		35.896	4
34.9519	5	35.72	35.0603	35.046		34.8844	5	35.6119	35.2771	35.2737		31.9512	4	32.2089	32.1741	32.2122		34.3292	5	34.413	34.3756	34.4927		33.7137	5	34.3222	33.881	33.8839		35.154	5	34.7911	34.9302	34.9504		33.8334	4	34.0581	33.9193	33.9435		35.0662	5	35.4948	35.0632	35.0428		35.8924	4
34.9421	5	35.7084	35.0448	35.0292		34.8779	5	35.6041	35.2709	35.268		31.9534	4	32.2157	32.1821	32.2188		34.3363	5	34.4067	34.3685	34.4861		33.7081	5	34.3071	33.867	33.8695		35.1672	5	34.787	34.9236	34.9446		33.8219	5	34.0555	33.9164	33.9406		35.0674	5	35.4892	35.0573	35.0372		35.8911	4
34.9327	5	35.6969	35.0296	35.0126		34.868	5	35.5964	35.2648	35.2623		31.953	5	32.2122	32.1783	32.2157		34.3506	5	34.4004	34.3616	34.4796		33.7012	5	34.2921	33.8532	33.8553		35.1812	5	34.7829	34.9169	34.9388		33.8178	5	34.0529	33.9135	33.9377		35.0735	5	35.4837	35.0514	35.0317		35.8993	4
34.9192	5	35.6855	35.0146	34.9964		34.8596	5	35.5887	35.2588	35.2567		31.9464	5	32.2087	32.1746	32.2127		34.352	5	34.3941	34.3546	34.4732		33.6997	5	34.2773	33.8394	33.8412		35.1904	5	34.7789	34.9102	34.933		33.8231	5	34.0503	33.9106	33.9348		35.0832	5	35.4782	35.0456	35.0262		35.9058	4
34.9077	5	35.6742	34.9998	34.9804		34.8551	5	35.581	35.2528	35.2512		31.9435	4	32.2154	32.1826	32.2192		34.3455	5	34.3879	34.3478	34.4669		33.6962	5	34.2625	33.8258	33.8272		35.1938	4	34.785	34.9228	34.9437		33.8231	5	34.0477	33.9077	33.9319		35.0902	5	35.4726	35.0398	35.0208		35.9126	4
34.8949	5	35.6628	34.9853	34.9647		34.8491	5	35.5734	35.2468	35.2457		31.9478	4	32.2222	32.1906	32.2258		34.339	5	34.3818	34.341	34.4606		33.6937	5	34.2478	33.8123	33.8134		35.1987	4	34.7911	34.9352	34.9543		33.8235	5	34.0452	33.9048	33.929		35.0978	5	35.4672	35.034	35.0153		35.9196	4
34.8762	5	35.6516	34.9709	34.9493		34.8434	5	35.5658	35.2409	35.2403		31.9565	4	32.2289	32.1984	32.2323		34.3374	5	34.3756	34.3342	34.4544		33.6889	5	34.2332	33.7989	33.7997		35.2182	4	34.7972	34.9474	34.9649		33.827	5	34.0427	33.902	33.9262		35.094	5	35.4617	35.0282	35.0099		35.9301	4
34.8562	5	35.6404	34.9568	34.9341		34.8394	5	35.5582	35.235	35.235		31.9674	4	32.2356	32.2063	32.2387		34.3412	5	34.3696	34.3276	34.4482		33.6804	5	34.2187	33.7856	33.7861		35.2313	4	34.8033	34.9595	34.9753		33.8291	5	34.0401	33.8992	33.9234		35.0934	5	35.4562	35.0225	35.0046		35.9386	4
34.8421	5	35.6293	34.9428	34.9192		34.8329	5	35.5506	35.2291	35.2297		31.9851	4	32.2422	32.214	32.2451		34.3355	5	34.3635	34.3209	34.4421		33.6684	4	34.2212	33.7885	33.7886		35.237	5	34.7992	34.9527	34.9692		33.8261	5	34.0376	33.8964	33.9206		35.0894	5	35.4508	35.0168	34.9993		35.9529	4
34.8326	5	35.6182	34.9291	34.9046		34.8241	4	35.5555	35.2365	35.2365		32.0136	4	32.2488	32.2218	32.2515		34.3292	5	34.3575	34.3143	34.4361		33.6508	5	34.2068	33.7753	33.7751		35.242	5	34.7951	34.946	34.9632		33.8243	5	34.0352	33.8936	33.9178		35.0875	5	35.4453	35.0112	34.994		35.9618	4
34.8291	5	35.6072	34.9155	34.8902		34.8131	5	35.548	35.2306	35.2311		32.0408	4	32.2555	32.2294	32.2578		34.3188	5	34.3516	34.3078	34.4301		33.6407	5	34.1925	33.7623	33.7617		35.2539	5	34.791	34.9393	34.9573		33.8305	5	34.0327	33.8909	33.915		35.0887	5	35.4399	35.0055	34.9887		35.971	4
34.8248	5	35.5963	34.9022	34.876		34.8058	5	35.5405	35.2248	35.2259		32.0598	4	32.2621	32.2371	32.2642		34.314	5	34.3456	34.3014	34.4242		33.6289	5	34.1782	33.7494	33.7485		35.2636	5	34.7869	34.9326	34.9513		33.8304	5	34.0302	33.8881	33.9123		35.0858	5	35.4345	34.9999	34.9835		35.9764	4
34.8236	4	35.5983	34.9061	34.8799		34.8059	5	35.533	35.219	35.2206		32.0676	4	32.2686	32.2446	32.2704		34.311	5	34.3398	34.2949	34.4184		33.6219	5	34.1641	33.7366	33.7354		35.2677	5	34.7829	34.9259	34.9454		33.8223	5	34.0278	33.8854	33.9096		35.0786	5	35.4291	34.9944	34.9783		35.9783	4
34.8094	5	35.5874	34.8929	34.8659		34.8046	5	35.5256	35.2133	35.2155		32.0843	4	32.2752	32.2521	32.2767		34.3089	5	34.3339	34.2886	34.4126		33.6161	5	34.15	33.7239	33.7225		35.279	5	34.7788	34.9192	34.9396		33.8179	5	34.0254	33.8827	33.9069		35.0719	5	35.4237	34.9888	34.9732		35.9777	4
34.7926	5	35.5766	34.8799	34.8522		34.8028	4	35.5306	35.2207	35.2223		32.1119	4	32.2817	32.2596	32.2829		34.3044	5	34.3281	34.2823	34.4068		33.6114	5	34.1361	33.7113	33.7096		35.2844	5	34.7747	34.9125	34.9338		33.8136	5	34.023	33.88	33.9042		35.0714	5	35.4183	34.9833	34.968		35.9801	4
34.789	5	35.5658	34.867	34.8387		34.8031	5	35.5231	35.215	35.2171		32.1306	4	32.2882	32.2671	32.289		34.3064	5	34.3224	34.276	34.4011		33.6085	5	34.1222	33.6989	33.6969		35.2949	5	34.7707	34.9059	34.928		33.8109	5	34.0206	33.8773	33.9015		35.0777	5	35.413	34.9778	34.9629		35.9633	5
34.7829	5	35.5551	34.8544	34.8254		34.7871	5	35.5157	35.2093	35.212		32.1455	4	32.2947	32.2744	32.2952		34.2973	4	34.3314	34.2856	34.4096		33.6077	5	34.1084	33.6865	33.6843		35.2941	5	34.7667	34.8993	34.9223		33.8096	5	34.0182	33.8747	33.8989		35.0816	5	35.4076	34.9724	34.9579		35.9209	5
34.7786	5	35.5444	34.8419	34.8124		34.7741	4	35.5207	35.2167	35.2189		32.1634	4	32.3011	32.2818	32.3013		34.2984	4	34.3405	34.2952	34.418		33.6007	5	34.0947	33.6743	33.6718		35.2947	5	34.7626	34.8926	34.9166		33.8053	5	34.0159	33.872	33.8963		35.0841	5	35.4023	34.9669	34.9529		35.8786	4
34.7704	5	35.5338	34.8297	34.7995		34.7668	5	35.5133	35.211	35.2137		32.1778	4	32.3076	32.2891	32.3074		34.3069	4	34.3494	34.3047	34.4264		33.5893	5	34.0811	33.6622	33.6595		35.2819	5	34.7586	34.886	34.9109		33.8019	5	34.0135	33.8694	33.8936		35.0759	5	35.397	34.9615	34.9479		35.8403	5
34.7615	5	35.5233	34.8176	34.7869		34.7535	5	35.506	35.2053	35.2086		32.1871	4	32.314	32.2963	32.3134		34.3247	4	34.3584	34.3141	34.4347		33.5784	5	34.0675	33.6502	33.6472		35.2735	5	34.7546	34.8794	34.9052		33.8036	5	34.0112	33.8668	33.8911		35.0703	5	35.3917	34.9562	34.9429		35.7977	5
34.7587	5	35.5128	34.8056	34.7745		34.7503	5	35.4987	35.1996	35.2036		32.2001	4	32.3204	32.3035	32.3194		34.325	4	34.3673	34.3235	34.443		33.572	5	34.0541	33.6384	33.6351		35.2703	5	34.7505	34.8729	34.8996		33.8048	5	34.0089	33.8642	33.8885		35.0652	5	35.3864	34.9508	34.938		35.766	5
34.7564	5	35.5023	34.7939	34.7623		34.7504	5	35.4914	35.194	35.1986		32.2195	4	32.3268	32.3107	32.3254		34.3188	4	34.3762	34.3329	34.4512		33.5703	5	34.0407	33.6266	33.6231		35.2646	5	34.7465	34.8663	34.8941		33.8032	5	34.0066	33.8617	33.8859		35.0682	5	35.3811	34.9455	34.9331		35.7408	5
34.7536	5	35.492	34.7823	34.7504		34.7546	5	35.4841	35.1884	35.1937		32.2396	4	32.3331	32.3178	32.3313		34.3151	4	34.385	34.3422	34.4594		33.5695	5	34.0275	33.615	33.6112		35.2638	5	34.7425	34.8598	34.8885		33.8016	5	34.0043	33.8591	33.8834		35.0707	5	35.3759	34.9403	34.9283		35.7108	5
34.7512	5	35.4816	34.7709	34.7386		34.7629	5	35.4769	35.1828	35.1889		32.2539	4	32.3394	32.3249	32.3372		34.3243	5	34.3788	34.3354	34.4531		33.566	5	34.0143	33.6035	33.5994		35.2609	5	34.7385	34.8532	34.883		33.7976	4	34.0141	33.8706	33.8952		35.0746	4	35.38	34.9476	34.9356		35.6804	5
34.7448	5	35.4714	34.7596	34.727		34.7717	5	35.4697	35.1773	35.1841		32.2625	4	32.3458	32.3319	32.3431		34.3434	5	34.3727	34.3287	34.4469		33.5631	4	34.0176	33.6073	33.6027		35.2516	4	34.7447	34.8666	34.8942		33.7846	5	34.0117	33.868	33.8926		35.0751	5	35.3748	34.9424	34.9308		35.6559	5
34.738	4	35.4738	34.7643	34.7316		34.7708	5	35.4625	35.1718	35.1793		32.2686	4	32.352	32.3389	32.3489		34.3636	5	34.3667	34.3221	34.4408		33.5485	5	34.0044	33.5959	33.591		35.231	5	34.7407	34.86	34.8887		33.781	5	34.0094	33.8654	33.89		35.0721	5	35.3695	34.9371	34.9259		35.6372	5
34.7418	4	35.4763	34.769	34.7362		34.7636	5	35.4553	35.1664	35.1747		32.2786	4	32.3583	32.3458	32.3547		34.3692	5	34.3607	34.3155	34.4347		33.5376	5	33.9914	33.5846	33.5794		35.22	5	34.7367	34.8535	34.8832		33.7854	5	34.0071	33.8628	33.8874		35.0714	5	35.3643	34.9319	34.9211		35.6206	5
34.7315	5	35.466	34.7578	34.7247		34.7606	5	35.4482	35.161	35.17		32.2876	4	32.3645	32.3527	32.3605		34.3731	5	34.3547	34.309	34.4287		33.5339	5	33.9784	33.5733	33.5679		35.219	5	34.7327	34.847	34.8777		33.7833	5	34.0048	33.8602	33.8849		35.0697	5	35.3591	34.9267	34.9163		35.5997	5
34.7199	5	35.4559	34.7467	34.7133		34.7554	5	35.4411	35.1557	35.1655		32.2993	4	32.3708	32.3595	32.3662		34.3772	5	34.3487	34.3025	34.4227		33.5295	5	33.9655	33.5622	33.5565		35.2303	5	34.7287	34.8405	34.8722		33.7831	5	34.0026	33.8576	33.8823		35.0666	5	35.3539	34.9215	34.9115		35.577	5
34.7155	5	35.4457	34.7358	34.7022		34.7581	5	35.4341	35.1503	35.161		32.2966	4	32.377	32.3663	32.372		34.3739	5	34.3428	34.2961	34.4168		33.5313	5	33.9528	33.5512	33.5452		35.2327	5	34.7248	34.834	34.8668		33.7833	5	34.0003	33.8551	33.8798		35.0637	5	35.3487	34.9164	34.9068		35.554	5
34.7198	5	35.4356	34.725	34.6912		34.7594	5	35.4271	35.1451	35.1565		32.2933	4	32.3832	32.3731	32.3776		34.3766	5	34.337	34.2897	34.411		33.5293	5	33.94	33.5403	33.534		35.2226	5	34.7208	34.8275	34.8615		33.7852	5	33.9981	33.8526	33.8773		35.0654	5	35.3435	34.9113	34.9021		35.5295	5
34.7163	5	35.4256	34.7144	34.6804		34.7605	5	35.4201	35.1398	35.1521		32.2966	4	32.3893	32.3798	32.3833		34.3762	5	34.3312	34.2834	34.4051		33.5217	5	33.9274	33.5295	33.523		35.208	5	34.7168	34.8211	34.8561		33.7916	5	33.9959	33.8501	33.8748		35.0734	5	35.3383	34.9062	34.8974		35.5145	5
34.7143	5	35.4157	34.704	34.6698		34.7587	5	35.4131	35.1346	35.1478		32.3176	4	32.3955	32.3865	32.3889		34.3578	5	34.3254	34.2772	34.3994		33.5169	5	33.9148	33.5188	33.512		35.1984	5	34.7128	34.8146	34.8508		33.7898	5	33.9937	33.8476	33.8723		35.0744	5	35.3332	34.9011	34.8928		35.5014	5
34.7079	5	35.4057	34.6937	34.6594		34.7627	4	35.4184	35.1424	35.155		32.3343	4	32.4016	32.3931	32.3945		34.3481	4	34.3344	34.2868	34.4078		33.51	5	33.9024	33.5082	33.5012		35.1948	5	34.7089	34.8082	34.8455		33.7876	5	33.9915	33.8451	33.8698		35.075	5	35.328	34.8961	34.8882		35.4901	5
34.7004	5	35.3959	34.6835	34.6491		34.7498	4	35.4238	35.1502	35.1621		32.3534	4	32.4077	32.3997	32.4001		34.3424	4	34.3434	34.2963	34.4162		33.5126	5	33.89	33.4977	33.4904		35.1936	5	34.7049	34.8018	34.8403		33.7868	5	33.9893	33.8426	33.8673		35.0632	5	35.3229	34.8911	34.8836		35.4679	5
34.6951	5	35.3861	34.6735	34.639		34.7303	4	35.4291	35.1578	35.1693		32.3704	4	32.4137	32.4062	32.4057		34.352	4	34.3524	34.3058	34.4245		33.5123	5	33.8777	33.4873	33.4798		35.2036	5	34.7009	34.7954	34.8351		33.7893	6	33.9991	33.8542	33.8793		35.0522	5	35.3178	34.8861	34.8791		35.4511	5
34.6922	5	35.3763	34.6636	34.6291		34.7146	5	35.422	35.1525	35.1648		32.3809	4	32.4198	32.4127	32.4112		34.3533	4	34.3613	34.3153	34.4328		33.5121	5	33.8654	33.477	33.4692		35.2082	5	34.697	34.789	34.8299		33.7934	6	34.0088	33.8657	33.8912		35.0458	5	35.3127	34.8811	34.8746		35.4419	5
34.6872	5	35.3666	34.6539	34.6193		34.7039	5	35.4151	35.1471	35.1603		32.3889	4	32.4258	32.4192	32.4167		34.3523	4	34.3702	34.3247	34.4411		33.5125	5	33.8533	33.4668	33.4588		35.2119	5	34.6931	34.7826	34.8247		33.8038	6	34.0185	33.8771	33.9029		35.0461	5	35.3076	34.8762	34.8701		35.4298	5
34.6845	5	35.357	34.6443	34.6097		34.7012	4	35.4204	35.1548	35.1674		32.3908	4	32.4318	32.4256	32.4221		34.3535	4	34.3791	34.334	34.4493		33.5127	5	33.8412	33.4567	33.4485		35.2096	5	34.6891	34.7762	34.8196		33.8321	4	34.0282	33.8885	33.9147		35.0422	5	35.3026	34.8713	34.8656		35.4164	5
34.679	5	35.3474	34.6349	34.6003		34.6956	5	35.4134	35.1494	35.1629		32.3905	4	32.4378	32.432	32.4276		34.3529	4	34.3879	34.3433	34.4575		33.5122	5	33.8292	33.4466	33.4383		35.2094	5	34.6852	34.7699	34.8145		33.8472	4	34.0378	33.8998	33.9263		35.0426	5	35.2975	34.8665	34.8612		35.4007	5
34.6691	5	35.3378	34.6256	34.591		34.6869	5	35.4065	35.1441	35.1585		32.4014	4	32.4438	32.4383	32.433		34.3451	4	34.3967	34.3526	34.4656		33.5163	5	33.8173	33.4367	33.4282		35.207	5	34.6813	34.7635	34.8094		33.84	5	34.0353	33.8969	33.9234		35.0491	5	35.2924	34.8616	34.8568		35.3828	4
34.6581	5	35.3283	34.6165	34.5819		34.6854	5	35.3996	35.1387	35.1541		32.4146	4	32.4498	32.4446	32.4384		34.3638	4	34.4055	34.3618	34.4736		33.5193	5	33.8054	33.4269	33.4182		35.208	6	34.6877	34.7782	34.8213		33.8282	5	34.0329	33.894	33.9205		35.0529	5	35.2874	34.8568	34.8524		35.3661	5
34.6391	5	35.3189	34.6075	34.5729		34.6905	5	35.3927	35.1335	35.1498		32.4224	4	32.4557	32.4508	32.4438		34.374	4	34.4142	34.371	34.4817		33.5268	4	33.8095	33.4317	33.4223		35.2065	6	34.6941	34.7926	34.8331		33.8202	5	34.0304	33.8911	33.9176		35.0535	5	35.2824	34.852	34.848		35.3484	5
34.6198	5	35.3095	34.5986	34.5641		34.6938	5	35.3859	35.1282	35.1455		32.4263	4	32.4616	32.457	32.4491		34.3916	4	34.4229	34.3801	34.4897		33.522	4	33.8135	33.4366	33.4264		35.2105	6	34.7005	34.8068	34.8447		33.8153	5	34.028	33.8883	33.9147		35.0531	5	35.2774	34.8472	34.8437		35.348	5
34.6013	5	35.3002	34.5898	34.5555		34.6964	5	35.379	35.123	35.1413		32.4328	4	32.4675	32.4631	32.4544		34.3822	4	34.4316	34.3891	34.4976		33.5175	4	33.8175	33.4414	33.4305		35.221	4	34.7068	34.8208	34.8562		33.8069	5	34.0256	33.8855	33.9119		35.0479	5	35.2724	34.8425	34.8394		35.3439	5
34.5899	5	35.2909	34.5812	34.5469		34.6944	5	35.3723	35.1179	35.1371		32.4375	4	32.4734	32.4693	32.4597		34.3676	4	34.4402	34.3982	34.5055		33.5018	4	33.8215	33.4461	33.4346		35.2133	4	34.7132	34.8346	34.8676		33.8017	5	34.0232	33.8827	33.9091		35.0456	5	35.2674	34.8378	34.8351		35.3423	5
34.578	5	35.2816	34.5728	34.5385		34.6894	5	35.3655	35.1127	35.1329		32.4409	4	32.4792	32.4753	32.465		34.3664	4	34.4488	34.4072	34.5134		33.4912	5	33.8096	33.4362	33.4246		35.1984	4	34.7195	34.8483	34.8789		33.7984	5	34.0208	33.8799	33.9063		35.041	4	35.2719	34.8459	34.8431		35.339	5
34.5731	5	35.2724	34.5644	34.5303		34.6779	5	35.3588	35.1076	35.1289		32.4445	4	32.4851	32.4814	32.4702		34.3774	4	34.4573	34.4161	34.5212		33.4794	5	33.7978	33.4264	33.4147		35.1881	5	34.7155	34.8417	34.8734		33.7955	5	34.0184	33.8771	33.9035		35.0168	5	35.2669	34.8411	34.8388		35.3395	5
34.5662	5	35.2633	34.5562	34.5222		34.6708	5	35.3521	35.1026	35.1248		32.4482	4	32.4909	32.4873	32.4755		34.3762	4	34.4659	34.425	34.529		33.476	5	33.7861	33.4167	33.4048		35.1755	5	34.7116	34.8353	34.8679		33.7916	5	34.0161	33.8744	33.9007		35.0159	5	35.2619	34.8364	34.8345		35.3286	5
34.5665	5	35.2542	34.5481	34.5142		34.6643	5	35.3454	35.0975	35.1209		32.4497	4	32.4967	32.4933	32.4806		34.3739	4	34.4744	34.4338	34.5368		33.4735	5	33.7745	33.4071	33.3951		35.1701	5	34.7076	34.8288	34.8624		33.7873	5	34.0137	33.8717	33.898		35.0208	5	35.257	34.8317	34.8302		35.3157	5
34.5625	5	35.2452	34.5401	34.5063		34.6596	5	35.3387	35.0925	35.1169		32.4526	4	32.5024	32.4992	32.4858		34.3779	4	34.4828	34.4426	34.5445		33.4711	5	33.7629	33.3976	33.3854		35.1705	5	34.7037	34.8223	34.857		33.7837	5	34.0114	33.869	33.8953		35.0248	5	35.252	34.827	34.826		35.3052	5
34.5577	5	35.2362	34.5323	34.4986		34.6585	5	35.3321	35.0876	35.113		32.4511	4	32.5082	32.505	32.4909		34.3945	4	34.4913	34.4514	34.5521		33.4658	5	33.7514	33.3881	33.3759		35.1802	5	34.6997	34.8159	34.8516		33.7735	5	34.0091	33.8663	33.8926		35.0294	5	35.2471	34.8224	34.8218		35.2957	5
34.5556	5	35.2272	34.5245	34.491		34.6592	5	35.3255	35.0826	35.1092		32.4495	4	32.5139	32.5109	32.4961		34.408	4	34.4997	34.4601	34.5598		33.4615	5	33.7399	33.3788	33.3664		35.1713	4	34.7061	34.8297	34.863		33.7731	5	34.0068	33.8636	33.8899		35.0349	5	35.2422	34.8178	34.8176		35.2937	5
34.5456	5	35.2183	34.5169	34.4836		34.6598	5	35.3189	35.0778	35.1054		32.4519	4	32.5197	32.5166	32.5011		34.4303	4	34.508	34.4688	34.5673		33.4554	5	33.7286	33.3695	33.357		35.1577	5	34.7021	34.8233	34.8576		33.7811	5	34.0045	33.8609	33.8872		35.0454	5	35.2373	34.8132	34.8134		35.2922	5
34.5362	5	35.2095	34.5094	34.4762		34.66	5	35.3124	35.0729	35.1017		32.455	4	32.5254	32.5224	32.5062		34.4219	4	34.5163	34.4774	34.5749		33.4507	5	33.7173	33.3604	33.3477		35.1484	5	34.6982	34.8168	34.8522		33.7919	5	34.0023	33.8583	33.8845		35.0504	4	35.2418	34.8214	34.8215		35.2849	5
34.5284	5	35.2007	34.502	34.469		34.6614	5	35.3059	35.0681	35.098		32.4622	4	32.531	32.5281	32.5112		34.4461	4	34.5247	34.486	34.5824		33.4432	5	33.7061	33.3513	33.3385		35.1497	5	34.6942	34.8104	34.8468		33.7962	5	34	33.8557	33.8819		35.0516	5	35.2369	34.8168	34.8173		35.2697	5
34.5261	5	35.1919	34.4947	34.4619		34.6661	4	35.3116	35.0761	35.1055		32.4683	4	32.5367	32.5337	32.5162		34.4598	4	34.5329	34.4945	34.5898		33.4393	5	33.6949	33.3423	33.3293		35.1502	5	34.6903	34.804	34.8415		33.7954	5	33.9978	33.8531	33.8793		35.0372	5	35.232	34.8122	34.8131		35.2578	5
34.5236	5	35.1832	34.4874	34.4549		34.6628	4	35.3172	35.0841	35.1129		32.4732	4	32.5423	32.5394	32.5212		34.4596	5	34.5258	34.4865	34.5821		33.4372	5	33.6838	33.3334	33.3203		35.148	5	34.6863	34.7976	34.8362		33.7947	5	33.9955	33.8505	33.8767		35.0383	5	35.2271	34.8076	34.809		35.2464	5
34.5218	5	35.1745	34.4803	34.4481		34.6466	4	35.3229	35.0921	35.1203		32.4745	4	32.5479	32.5449	32.5262		34.4568	5	34.5186	34.4785	34.5745		33.4358	5	33.6728	33.3246	33.3113		35.1435	5	34.6824	34.7912	34.8309		33.7974	5	33.9933	33.848	33.8741		35.0371	5	35.2223	34.803	34.8048		35.2446	5
34.5156	5	35.1659	34.4733	34.4413		34.641	4	35.3285	35.1	35.1277		32.4783	4	32.5535	32.5505	32.5311		34.4378	5	34.5116	34.4706	34.5669		33.4288	5	33.6619	33.3158	33.3024		35.1517	5	34.6785	34.7848	34.8256		33.7955	5	33.9912	33.8454	33.8715		35.0414	5	35.2174	34.7985	34.8007		35.2418	5
34.5055	5	35.1574	34.4664	34.4346		34.6312	4	35.3341	35.1079	35.1351		32.4805	4	32.5591	32.556	32.536		34.4509	5	34.5045	34.4628	34.5594		33.4162	5	33.651	33.3072	33.2935		35.1447	5	34.6746	34.7784	34.8204		33.7967	5	33.989	33.8429	33.869		35.0502	5	35.2126	34.794	34.7967		35.2357	5
34.4974	5	35.1488	34.4596	34.4281		34.6248	5	35.3275	35.1027	35.131		32.4751	4	32.5647	32.5615	32.5408		34.4498	5	34.4976	34.455	34.5519		33.4047	5	33.6402	33.2986	33.2848		35.1343	5	34.6707	34.772	34.8152		33.7985	5	33.9868	33.8404	33.8665		35.0524	5	35.2078	34.7895	34.7926		35.2257	5
34.4901	5	35.1404	34.4529	34.4217		34.6268	5	35.3209	35.0976	35.127		32.4724	4	32.5702	32.5669	32.5457		34.4582	5	34.4907	34.4473	34.5446		33.3942	5	33.6295	33.2901	33.2761		35.128	5	34.6667	34.7657	34.81		33.7965	5	33.9847	33.8379	33.864		35.0567	5	35.2029	34.785	34.7886		35.2193	5
34.481	5	35.1319	34.4463	34.4154		34.6281	5	35.3143	35.0925	35.123		32.4741	4	32.5758	32.5723	32.5505		34.4558	5	34.4838	34.4397	34.5373		33.3877	5	33.6189	33.2817	33.2675		35.1315	5	34.6628	34.7594	34.8049		33.7935	5	33.9825	33.8355	33.8615		35.0637	4	35.2076	34.7934	34.7968		35.2137	5
34.478	5	35.1235	34.4398	34.4092		34.6358	5	35.3078	35.0874	35.1191		32.4743	4	32.5813	32.5777	32.5552		34.4491	5	34.4769	34.4321	34.53		33.3813	5	33.6083	33.2734	33.259		35.1346	5	34.6589	34.7531	34.7998		33.7887	5	33.9804	33.833	33.859		35.0566	5	35.2028	34.7889	34.7928		35.2137	5
34.471	5	35.1152	34.4333	34.4031		34.6399	5	35.3013	35.0824	35.1152		32.4792	4	32.5867	32.583	32.56		34.4646	5	34.4702	34.4246	34.5229		33.3694	5	33.5977	33.2651	33.2506		35.1345	5	34.6551	34.7468	34.7947		33.7864	5	33.9783	33.8306	33.8565		35.0494	5	35.198	34.7844	34.7887		35.2118	5
34.4619	5	35.1069	34.427	34.3971		34.6397	5	35.2949	35.0774	35.1114		32.4838	4	32.5922	32.5883	32.5647		34.4551	4	34.4786	34.4335	34.5306		33.3595	5	33.5873	33.2569	33.2422		35.1274	4	34.6616	34.7616	34.8065		33.7938	5	33.9762	33.8282	33.8541		35.0435	5	35.1932	34.78	34.7847		35.212	5
34.4542	5	35.0987	34.4207	34.3912		34.6394	5	35.2884	35.0725	35.1076		32.4831	4	32.5977	32.5935	32.5694		34.4601	5	34.4719	34.426	34.5234		33.354	5	33.5769	33.2488	33.2339		35.12	4	34.668	34.7763	34.8182		33.7985	5	33.9741	33.8258	33.8516		35.0422	5	35.1884	34.7756	34.7808		35.2116	5
34.4406	5	35.0904	34.4146	34.3854		34.6376	5	35.282	35.0675	35.1038		32.4797	4	32.6031	32.5987	32.5741		34.4455	5	34.4651	34.4185	34.5163		33.3501	5	33.5666	33.2408	33.2257		35.1096	5	34.6641	34.7699	34.813		33.7962	5	33.9721	33.8235	33.8492		35.0422	5	35.1836	34.7712	34.7768		35.2084	5
34.4288	4	35.0942	34.4213	34.3918		34.6394	5	35.2757	35.0626	35.1001		32.4853	4	32.6085	32.6039	32.5787		34.4451	4	34.4736	34.4274	34.524		33.3489	5	33.5563	33.2328	33.2175		35.1136	5	34.6602	34.7636	34.8078		33.7961	5	33.97	33.8211	33.8468		35.047	5	35.1789	34.7668	34.7728		35.2088	5
34.4389	4	35.0979	34.428	34.3981		34.6377	5	35.2693	35.0578	35.0964		32.493	4	32.6139	32.609	32.5834		34.4569	5	34.4668	34.42	34.5168		33.3468	5	33.5461	33.2249	33.2094		35.1152	5	34.6564	34.7573	34.8026		33.7896	5	33.968	33.8188	33.8444		35.0493	5	35.1741	34.7625	34.7689		35.2058	5
34.46	4	35.1017	34.4346	34.4043		34.6337	6	35.2751	35.0658	35.1039		32.493	4	32.6193	32.6142	32.588		34.4598	5	34.4601	34.4126	34.5098		33.3472	5	33.536	33.2171	33.2014		35.1127	5	34.6525	34.751	34.7975		33.7868	5	33.966	33.8164	33.8421		35.053	5	35.1694	34.7582	34.765		35.2007	5
34.4814	4	35.1054	34.4412	34.4105		34.6379	6	35.2808	35.0738	35.1113		32.4887	4	32.6246	32.6192	32.5925		34.4609	5	34.4535	34.4052	34.5027		33.3438	5	33.5259	33.2094	33.1935		35.1086	5	34.6486	34.7447	34.7924		33.7819	5	33.964	33.8141	33.8397		35.0625	5	35.1647	34.7539	34.7612		35.1987	5
34.5056	4	35.1091	34.4478	34.4167		34.6576	6	35.2866	35.0818	35.1187		32.4781	4	32.63	32.6242	32.5971		34.4659	5	34.4469	34.3979	34.4957		33.3413	5	33.5159	33.2018	33.1856		35.1114	5	34.6447	34.7384	34.7873		33.7811	5	33.962	33.8118	33.8374		35.0684	5	35.16	34.7496	34.7573		35.1938	5
34.5129	4	35.1128	34.4543	34.4229		34.6707	6	35.2923	35.0896	35.1261		32.4774	4	32.6353	32.6292	32.6016		34.4721	5	34.4403	34.3907	34.4888		33.334	5	33.506	33.1942	33.1778		35.1195	5	34.6408	34.7321	34.7822		33.7818	5	33.96	33.8096	33.8351		35.0715	6	35.1648	34.7583	34.7657		35.1842	5
34.5058	4	35.1164	34.4608	34.429		34.6798	6	35.298	35.0975	35.1334		32.4805	4	32.6406	32.6342	32.6061		34.4823	5	34.4337	34.3836	34.482		33.325	5	33.4961	33.1867	33.1701		35.1213	5	34.637	34.7259	34.7772		33.7842	5	33.958	33.8073	33.8328		35.0792	6	35.1695	34.7668	34.774		35.1696	4
34.4925	5	35.1081	34.454	34.4225		34.6959	6	35.3037	35.1052	35.1407		32.4856	4	32.6459	32.6391	32.6106		34.4859	5	34.4273	34.3765	34.4752		33.3181	5	33.4863	33.1793	33.1625		35.1124	5	34.6331	34.7196	34.7722		33.7883	5	33.9561	33.805	33.8305		35.0878	6	35.1743	34.7753	34.7822		35.1571	4
34.473	5	35.0999	34.4473	34.4161		34.7271	6	35.3094	35.113	35.1479		32.4899	4	32.6512	32.644	32.615		34.4956	5	34.4208	34.3695	34.4685		33.3118	5	33.4766	33.1719	33.1549		35.1056	5	34.6292	34.7134	34.7672		33.7957	5	33.9541	33.8028	33.8283		35.1083	6	35.179	34.7838	34.7904		35.1509	4
34.4596	4	35.1036	34.4539	34.4223		34.7665	6	35.3151	35.1206	35.1551		32.4984	4	32.6564	32.6488	32.6194		34.5028	5	34.4144	34.3625	34.4619		33.312	5	33.4669	33.1646	33.1474		35.1078	5	34.6254	34.7072	34.7623		33.8029	5	33.9522	33.8006	33.826		35.1283	6	35.1837	34.7922	34.7985		35.1368	5
34.447	5	35.0954	34.4472	34.4159		34.8036	6	35.3207	35.1283	35.1623		32.5095	4	32.6616	32.6536	32.6238		34.5038	5	34.4081	34.3556	34.4553		33.3078	5	33.4572	33.1574	33.14		35.1077	5	34.6215	34.701	34.7574		33.8051	5	33.9503	33.7984	33.8238		35.1516	6	35.1884	34.8005	34.8066		35.1286	5
34.4305	5	35.0872	34.4406	34.4096		34.8391	6	35.3263	35.1358	35.1695		32.5196	4	32.6669	32.6584	32.6282		34.5017	5	34.4018	34.3487	34.4488		33.3039	5	33.4477	33.1503	33.1327		35.1048	5	34.6177	34.6948	34.7525		33.8105	5	33.9484	33.7962	33.8216		35.1797	6	35.1931	34.8088	34.8146		35.1213	5
34.4166	4	35.0909	34.4471	34.4158		34.8756	6	35.3319	35.1434	35.1765		32.5327	4	32.6721	32.6632	32.6325		34.4972	5	34.3955	34.3419	34.4423		33.2968	5	33.4382	33.1432	33.1254		35.0938	4	34.6243	34.7104	34.7646		33.818	5	33.9465	33.794	33.8194		35.2058	6	35.1978	34.817	34.8226		35.1263	5
34.4016	5	35.0828	34.4405	34.4095		34.9046	6	35.3375	35.1508	35.1836		32.5392	4	32.6772	32.6679	32.6368		34.4942	5	34.3893	34.3352	34.4359		33.2906	5	33.4287	33.1362	33.1182		35.0813	5	34.6205	34.7042	34.7597		33.8231	5	33.9446	33.7918	33.8173		35.2326	6	35.2024	34.8251	34.8305		35.1234	5
34.3822	5	35.0746	34.434	34.4033		34.9291	6	35.3431	35.1583	35.1906		32.5486	4	32.6824	32.6726	32.6411		34.4922	5	34.3831	34.3285	34.4296		33.2846	5	33.4194	33.1293	33.1111		35.0686	5	34.6166	34.698	34.7548		33.835	5	33.9427	33.7897	33.8151		35.2523	4	35.2071	34.8332	34.8383		35.1154	4
34.3792	5	35.0666	34.4276	34.3972		34.9465	6	35.3486	35.1656	35.1976		32.556	4	32.6875	32.6773	32.6453		34.4948	5	34.377	34.3219	34.4234		33.2786	5	33.41	33.1224	33.1041		35.0615	5	34.6128	34.6918	34.7499		33.8592	6	33.9527	33.8015	33.8273		35.252	5	35.2022	34.8285	34.8339		35.1119	5
34.3735	5	35.0585	34.4213	34.3912		34.9598	6	35.3542	35.173	35.2045		32.5606	4	32.6927	32.6819	32.6495		34.4876	5	34.3709	34.3153	34.4172		33.2758	6	33.4156	33.1289	33.1096		35.0568	5	34.609	34.6857	34.745		33.9035	6	33.9626	33.8133	33.8394		35.2207	5	35.1974	34.8238	34.8295		35.0932	5
34.3749	5	35.0505	34.415	34.3853		34.9725	6	35.3597	35.1803	35.2114		32.5658	4	32.6978	32.6865	32.6537		34.4795	5	34.3649	34.3088	34.411		33.2745	6	33.4211	33.1354	33.1151		35.0606	5	34.6052	34.6795	34.7402		33.9544	6	33.9725	33.825	33.8515		35.1873	5	35.1927	34.8191	34.8251		35.0844	5
34.3709	5	35.0426	34.4089	34.3795		34.9828	6	35.3652	35.1875	35.2183		32.5751	4	32.7029	32.6911	32.6579		34.4776	5	34.3588	34.3023	34.4049		33.2788	6	33.4265	33.1418	33.1206		35.0599	5	34.6013	34.6734	34.7354		34.004	6	33.9823	33.8366	33.8634		35.1639	5	35.1879	34.8145	34.8207		35.0796	5
34.3567	5	35.0347	34.4028	34.3738		34.995	6	35.3707	35.1947	35.2251		32.6044	4	32.7079	32.6957	32.6621		34.471	5	34.3529	34.2959	34.3989		33.2836	6	33.432	33.1482	33.1261		35.0538	5	34.5975	34.6673	34.7306		34.0438	6	33.9921	33.8481	33.8753		35.1408	5	35.1831	34.8099	34.8164		35.0757	5
34.3474	5	35.0268	34.3968	34.3682		35.0155	6	35.3761	35.2018	35.2319		32.6353	4	32.713	32.7002	32.6662		34.4644	4	34.3618	34.3054	34.4072		33.2842	6	33.4374	33.1546	33.1315		35.0544	5	34.5937	34.6612	34.7259		34.0865	6	34.0019	33.8596	33.887		35.1207	5	35.1784	34.8053	34.8121		35.0717	5
34.3384	5	35.019	34.3909	34.3626		35.0278	6	35.3816	35.2089	35.2386		32.6544	4	32.718	32.7047	32.6703		34.4685	5	34.3558	34.2989	34.4011		33.2816	6	33.4428	33.161	33.137		35.0595	5	34.5899	34.6551	34.7212		34.121	6	34.0116	33.8709	33.8988		35.1114	5	35.1736	34.8007	34.8079		35.0719	5
34.3292	5	35.0112	34.3851	34.3572		35.0313	6	35.387	35.2159	35.2453		32.6587	4	32.7231	32.7092	32.6744		34.4654	5	34.3499	34.2925	34.3951		33.2729	6	33.4482	33.1673	33.1423		35.0574	5	34.5861	34.649	34.7165		34.1469	6	34.0213	33.8822	33.9104		35.1067	5	35.1689	34.7961	34.8037		35.0705	4
34.3141	5	35.0035	34.3794	34.3518		35.0378	6	35.3924	35.2229	35.252		32.6629	4	32.7281	32.7136	32.6784		34.4748	5	34.344	34.2862	34.3892		33.2707	4	33.4536	33.1736	33.1477		35.0603	6	34.5928	34.6653	34.729		34.168	6	34.031	33.8935	33.9219		35.1037	5	35.1642	34.7916	34.7995		35.0619	5
34.3049	5	34.9958	34.3738	34.3466		35.0483	6	35.3978	35.2298	35.2587		32.6904	4	32.7331	32.718	32.6825		34.48	5	34.3381	34.2799	34.3834		33.2678	4	33.459	33.1798	33.153		35.0725	6	34.5995	34.6813	34.7413		34.1891	6	34.0406	33.9046	33.9334		35.1116	5	35.1595	34.7871	34.7953		35.0435	5
34.2953	5	34.9881	34.3682	34.3414		35.059	4	35.4032	35.2367	35.2653		32.7157	4	32.738	32.7224	32.6865		34.4815	5	34.3323	34.2737	34.3775		33.2565	4	33.4643	33.1861	33.1583		35.0909	6	34.6062	34.6972	34.7535		34.2021	6	34.0502	33.9157	33.9448		35.1134	4	35.1642	34.7954	34.8033		35.0347	5
34.2795	5	34.9805	34.3627	34.3363		35.0432	4	35.4086	35.2436	35.2718		32.7327	4	32.743	32.7268	32.6904		34.4803	5	34.3265	34.2675	34.3718		33.2514	5	33.4547	33.1787	33.1508		35.116	6	34.6129	34.7128	34.7656		34.2146	6	34.0597	33.9267	33.9561		35.1079	5	35.1595	34.7909	34.7991		35.0296	5
34.2725	5	34.973	34.3573	34.3313		35.0055	4	35.4139	35.2504	35.2783		32.7508	4	32.7479	32.7311	32.6944		34.4829	5	34.3208	34.2614	34.3661		33.2495	5	33.4452	33.1715	33.1434		35.1279	6	34.6195	34.7281	34.7776		34.2243	6	34.0693	33.9376	33.9674		35.094	5	35.1548	34.7864	34.7949		35.0266	5
34.265	5	34.9654	34.352	34.3263		34.9617	4	35.4193	35.2571	35.2848		32.7748	4	32.7528	32.7354	32.6983		34.4674	5	34.3151	34.2554	34.3604		33.247	5	33.4357	33.1643	33.136		35.1559	6	34.6261	34.7433	34.7894		34.2237	6	34.0787	33.9485	33.9785		35.0966	5	35.1502	34.7819	34.7908		35.0229	5
34.2625	5	34.9579	34.3467	34.3215		34.9155	4	35.4246	35.2638	35.2913		32.8005	4	32.7578	32.7397	32.7023		34.4604	5	34.3094	34.2493	34.3548		33.2405	5	33.4262	33.1572	33.1287		35.1654	6	34.6327	34.7582	34.8012		34.2261	6	34.0882	33.9593	33.9896		35.0942	5	35.1455	34.7774	34.7866		35.0184	5
34.2523	5	34.9505	34.3415	34.3167		34.8739	4	35.4299	35.2705	35.2977		32.8204	4	32.7626	32.7439	32.7062		34.4309	5	34.3038	34.2434	34.3493		33.2388	5	33.4169	33.1501	33.1215		35.1708	6	34.6393	34.7729	34.8127		34.2234	6	34.0976	33.97	34.0006		35.0888	5	35.1408	34.773	34.7825		35.0159	5
34.2355	5	34.9431	34.3364	34.312		34.8377	4	35.4351	35.2771	35.3041		32.8394	4	32.7675	32.7481	32.71		34.4234	5	34.2982	34.2375	34.3438		33.2333	5	33.4076	33.1431	33.1143		35.1843	6	34.6458	34.7874	34.8242		34.2101	6	34.1069	33.9807	34.0116		35.0924	5	35.1362	34.7686	34.7785		35.0186	5
34.2331	5	34.9357	34.3314	34.3074		34.8061	4	35.4404	35.2837	35.3104		32.8554	4	32.7724	32.7523	32.7139		34.4233	5	34.2926	34.2316	34.3384		33.2296	5	33.3983	33.1362	33.1072		35.1993	6	34.6524	34.8017	34.8355		34.2052	6	34.1162	33.9912	34.0225		35.1011	5	35.1316	34.7642	34.7744		35.0209	5
34.2234	5	34.9284	34.3264	34.3028		34.7837	4	35.4457	35.2903	35.3168		32.8632	4	32.7772	32.7565	32.7177		34.4062	5	34.2871	34.2258	34.333		33.2261	5	33.3891	33.1293	33.1002		35.2162	6	34.6589	34.8158	34.8468		34.2022	6	34.1255	34.0017	34.0333		35.1102	5	35.1269	34.7598	34.7704		35.0105	5
34.2094	5	34.9211	34.3215	34.2984		34.775	4	35.4509	35.2968	35.3231		32.8827	4	32.782	32.7606	32.7215		34.3953	5	34.2817	34.22	34.3276		33.2242	5	33.38	33.1226	33.0932		35.2582	6	34.6654	34.8297	34.8579		34.2021	4	34.1348	34.0122	34.044		35.11	5	35.1223	34.7555	34.7664		35.0016	5
34.1965	5	34.9138	34.3167	34.294		34.7683	4	35.4561	35.3032	35.3293		32.911	4	32.7868	32.7647	32.7254		34.3866	5	34.2762	34.2143	34.3223		33.2179	5	33.3709	33.1158	33.0864		35.299	6	34.6719	34.8434	34.8689		34.1998	4	34.144	34.0226	34.0546		35.1102	5	35.1177	34.7512	34.7624		34.9978	4
34.1925	5	34.9066	34.3119	34.2896		34.7672	4	35.4613	35.3096	35.3355		32.9229	4	32.7916	32.7687	32.7291		34.3913	5	34.2708	34.2087	34.3171		33.2126	5	33.3619	33.1092	33.0796		35.3262	6	34.6783	34.8569	34.8797		34.1766	4	34.1532	34.0329	34.0652		35.1074	5	35.1132	34.7469	34.7584		34.9901	5
34.1846	5	34.8994	34.3072	34.2854		34.7611	4	35.4665	35.316	35.3417		32.9437	4	32.7964	32.7728	32.7329		34.3966	5	34.2655	34.203	34.3119		33.2054	5	33.353	33.1026	33.0728		35.3585	6	34.6848	34.8703	34.8905		34.1458	5	34.1499	34.0288	34.0611		35.11	5	35.1086	34.7426	34.7545		34.9704	5
34.1847	5	34.8923	34.3026	34.2812		34.7494	4	35.4716	35.3223	35.3478		32.9647	4	32.8012	32.7768	32.7367		34.4001	5	34.2602	34.1975	34.3067		33.2027	5	33.3441	33.0961	33.0661		35.3834	6	34.6912	34.8834	34.9012		34.1175	5	34.1467	34.0247	34.057		35.113	5	35.104	34.7383	34.7506		34.9664	5
34.1821	5	34.8852	34.298	34.277		34.7419	5	35.4645	35.315	35.341		32.9752	4	32.8059	32.7808	32.7404		34.3946	5	34.2549	34.192	34.3016		33.2045	5	33.3352	33.0896	33.0595		35.3983	6	34.6976	34.8963	34.9117		34.087	5	34.1435	34.0207	34.0529		35.1233	5	35.0995	34.7341	34.7467		34.9597	5
34.1786	5	34.8782	34.2935	34.273		34.7268	5	35.4573	35.3077	35.3343		32.982	4	32.8106	32.7847	32.7441		34.3871	5	34.2496	34.1865	34.2965		33.2047	5	33.3264	33.0832	33.053		35.4203	6	34.7039	34.9091	34.9221		34.0618	5	34.1403	34.0167	34.0489		35.122	5	35.0949	34.7299	34.7429		34.9509	5
34.1778	5	34.8711	34.2891	34.269		34.7209	5	35.4502	35.3005	35.3276		32.9869	4	32.8153	32.7886	32.7478		34.3977	5	34.2444	34.181	34.2914		33.2004	5	33.3177	33.0768	33.0465		35.4421	6	34.7103	34.9216	34.9324		34.0373	5	34.1372	34.0128	34.0449		35.127	5	35.0904	34.7257	34.7391		34.946	5
34.1748	5	34.8642	34.2847	34.2651		34.712	5	35.4431	35.2934	35.321		32.99	4	32.82	32.7925	32.7515		34.3913	5	34.2392	34.1757	34.2864		33.1918	5	33.309	33.0705	33.0401		35.4532	6	34.7166	34.934	34.9426		34.0175	6	34.1464	34.0231	34.0555		35.1248	6	35.0954	34.7344	34.7475		34.9455	5
34.1607	5	34.8572	34.2803	34.2612		34.7169	5	35.436	35.2863	35.3145		32.9993	4	32.8247	32.7964	32.7552		34.372	5	34.2341	34.1703	34.2815		33.1846	5	33.3004	33.0643	33.0337		35.4645	6	34.723	34.9462	34.9527		34.0048	6	34.1556	34.0334	34.0661		35.1357	6	35.1003	34.7431	34.7558		34.9454	5
34.158	5	34.8503	34.2761	34.2574		34.7162	5	35.429	35.2792	35.308		33.0069	4	32.8294	32.8002	32.7589		34.3493	5	34.229	34.165	34.2766		33.1764	5	33.2918	33.0581	33.0274		35.4773	6	34.7293	34.9583	34.9627		33.9937	6	34.1647	34.0436	34.0766		35.1617	6	35.1053	34.7517	34.7641		34.9436	5
34.1521	5	34.8434	34.2719	34.2536		34.722	5	35.422	35.2722	35.3016		33.0179	4	32.834	32.8041	32.7625		34.3372	4	34.2384	34.1752	34.2854		33.1686	5	33.2833	33.052	33.0212		35.4797	6	34.7355	34.9701	34.9726		33.9841	6	34.1738	34.0537	34.087		35.1905	6	35.1102	34.7602	34.7723		34.9399	5
34.1472	5	34.8366	34.2678	34.2499		34.7179	5	35.415	35.2653	35.2953		33.0296	4	32.8386	32.8078	32.7661		34.3208	5	34.2333	34.1699	34.2804		33.1615	5	33.2749	33.0459	33.015		35.4848	6	34.7418	34.9818	34.9823		33.9862	6	34.1829	34.0638	34.0974		35.2211	6	35.1151	34.7687	34.7805		34.9354	5
34.1396	5	34.8298	34.2637	34.2463		34.716	5	35.4081	35.2584	35.289		33.0386	4	32.8433	32.8116	32.7697		34.3054	5	34.2282	34.1646	34.2755		33.1556	5	33.2665	33.0399	33.0089		35.4894	6	34.748	34.9934	34.992		34.0045	6	34.1919	34.0738	34.1077		35.2501	6	35.12	34.7771	34.7886		34.9244	5
34.1364	5	34.823	34.2597	34.2427		34.7118	4	35.4134	35.265	35.2953		33.0545	4	32.8479	32.8153	32.7733		34.2881	5	34.2231	34.1593	34.2707		33.1538	5	33.2581	33.0339	33.0028		35.5	6	34.7543	35.0047	35.0015		34.0362	6	34.2009	34.0838	34.1179		35.2745	6	35.1249	34.7855	34.7966		34.9098	5
34.1349	5	34.8163	34.2557	34.2392		34.7032	5	35.4065	35.2581	35.289		33.0674	4	32.8524	32.819	32.7769		34.2884	5	34.2181	34.1541	34.2658		33.1478	5	33.2498	33.028	32.9969		35.5014	6	34.7605	35.016	35.011		34.072	6	34.2098	34.0936	34.128		35.2902	6	35.1298	34.7938	34.8046		34.8993	5
34.1282	4	34.821	34.2633	34.2462		34.6963	5	35.3996	35.2512	35.2828		33.0759	4	32.857	32.8227	32.7804		34.3009	5	34.2131	34.149	34.2611		33.1385	5	33.2416	33.0222	32.9909		35.4983	6	34.7666	35.027	35.0204		34.1044	6	34.2188	34.1035	34.1381		35.3066	6	35.1347	34.8021	34.8126		34.8943	5
34.1195	5	34.8143	34.2593	34.2426		34.6942	5	35.3927	35.2444	35.2766		33.0817	4	32.8616	32.8264	32.784		34.3094	5	34.2081	34.1439	34.2563		33.1279	5	33.2334	33.0164	32.9851		35.4924	6	34.7728	35.0379	35.0296		34.1426	4	34.2277	34.1132	34.1481		35.3302	6	35.1395	34.8103	34.8205		34.8898	5
34.1043	5	34.8076	34.2553	34.2391		34.6948	5	35.3859	35.2377	35.2705		33.0947	4	32.8661	32.83	32.7875		34.3058	5	34.2032	34.1388	34.2517		33.1201	5	33.2252	33.0106	32.9792		35.4948	6	34.779	35.0486	35.0388		34.1567	4	34.2365	34.1229	34.158		35.3483	6	35.1443	34.8184	34.8283		34.8871	5
34.099	5	34.801	34.2514	34.2356		34.6983	5	35.379	35.231	35.2644		33.0962	4	32.8706	32.8336	32.791		34.3009	5	34.1983	34.1338	34.247		33.1164	5	33.2172	33.0049	32.9735		35.5016	6	34.7851	35.0592	35.0478		34.1396	4	34.2453	34.1325	34.1679		35.3478	6	35.1492	34.8265	34.8361		34.8866	5
34.0981	5	34.7944	34.2475	34.2322		34.708	5	35.3723	35.2243	35.2584		33.1021	4	32.8751	32.8372	32.7945		34.3084	5	34.1934	34.1288	34.2424		33.1134	5	33.2091	32.9993	32.9678		35.4967	6	34.7912	35.0696	35.0568		34.1092	4	34.2541	34.1421	34.1777		35.3379	6	35.154	34.8345	34.8438		34.8895	5
34.0986	5	34.7878	34.2437	34.2288		34.7091	5	35.3655	35.2177	35.2525		33.1089	4	32.8796	32.8408	32.798		34.3104	5	34.1886	34.1239	34.2378		33.1099	5	33.2011	32.9937	32.9621		35.4968	6	34.7973	35.0799	35.0657		34.0785	5	34.2502	34.1372	34.1726		35.3378	6	35.1588	34.8425	34.8514		34.8858	4
34.0959	5	34.7813	34.24	34.2255		34.7028	5	35.3588	35.2111	35.2466		33.1197	4	32.8841	32.8443	32.8014		34.3133	5	34.1838	34.119	34.2333		33.1014	5	33.1932	32.9881	32.9566		35.4866	6	34.8034	35.09	35.0745		34.0463	5	34.2463	34.1323	34.1676		35.348	6	35.1635	34.8504	34.859		34.8693	5
34.1	5	34.7748	34.2363	34.2222		34.6945	5	35.3521	35.2046	35.2407		33.1278	4	32.8885	32.8478	32.8049		34.3042	5	34.1791	34.1141	34.2288		33.0915	5	33.1853	32.9827	32.951		35.4842	6	34.8094	35.0999	35.0831		34.0199	5	34.2425	34.1274	34.1626		35.357	6	35.1683	34.8583	34.8666		34.8515	5
34.0945	5	34.7683	34.2327	34.219		34.6839	5	35.3454	35.1981	35.235		33.1268	4	32.893	32.8513	32.8083		34.2968	5	34.1744	34.1093	34.2243		33.0843	5	33.1775	32.9772	32.9455		35.4915	6	34.8154	35.1098	35.0917		33.9973	5	34.2386	34.1226	34.1576		35.3744	6	35.173	34.8661	34.8741		34.8465	5
34.0898	5	34.7619	34.2291	34.2158		34.6815	5	35.3387	35.1917	35.2292		33.126	4	32.8974	32.8548	32.8117		34.2989	5	34.1697	34.1046	34.2199		33.0787	5	33.1697	32.9719	32.9401		35.487	6	34.8215	35.1194	35.1003		33.9828	5	34.2348	34.1178	34.1527		35.3995	6	35.1778	34.8738	34.8815		34.8408	5
34.0699	5	34.7555	34.2256	34.2127		34.686	5	35.3321	35.1854	35.2236		33.1424	4	32.9018	32.8582	32.8151		34.2935	5	34.165	34.0999	34.2155		33.0723	5	33.162	32.9665	32.9347		35.4904	6	34.8275	35.129	35.1087		33.968	5	34.231	34.113	34.1478		35.4174	6	35.1825	34.8815	34.8889		34.8328	5
34.0623	4	34.7604	34.2334	34.2199		34.6883	5	35.3255	35.179	35.218		33.1506	4	32.9062	32.8616	32.8184		34.2989	5	34.1604	34.0952	34.2112		33.0658	5	33.1543	32.9613	32.9294		35.5042	6	34.8334	35.1384	35.117		33.963	5	34.2273	34.1083	34.143		35.4086	6	35.1872	34.8891	34.8962		34.8312	5
34.0561	4	34.7652	34.2411	34.227		34.6892	5	35.3189	35.1728	35.2124		33.1552	4	32.9106	32.865	32.8218		34.2928	5	34.1558	34.0905	34.2069		33.064	5	33.1466	32.9561	32.9242		35.4982	6	34.8394	35.1477	35.1253		33.9539	5	34.2236	34.1036	34.1382		35.4118	6	35.1919	34.8967	34.9035		34.8347	5
34.0469	5	34.7588	34.2374	34.2237		34.6965	5	35.3124	35.1665	35.2069		33.1601	4	32.915	32.8684	32.8251		34.3016	5	34.1512	34.0859	34.2027		33.0612	5	33.139	32.9509	32.9189		35.4884	4	34.8453	35.1568	35.1334		33.9463	5	34.2199	34.099	34.1334		35.4236	6	35.1966	34.9042	34.9108		34.8348	5
34.0303	5	34.7524	34.2338	34.2204		34.6996	5	35.3059	35.1603	35.2014		33.1489	4	32.9193	32.8717	32.8284		34.2961	5	34.1467	34.0814	34.1985		33.0607	5	33.1315	32.9458	32.9138		35.4548	4	34.8513	35.1658	35.1415		33.9353	5	34.2162	34.0943	34.1286		35.4293	6	35.2012	34.9117	34.9179		34.8354	5
34.0256	5	34.7461	34.2302	34.2173		34.7004	5	35.2994	35.1542	35.196		33.1312	4	32.9237	32.875	32.8317		34.2918	5	34.1422	34.0768	34.1943		33.056	5	33.124	32.9407	32.9087		35.4195	4	34.8572	35.1747	35.1494		33.9206	5	34.2125	34.0897	34.1239		35.4368	6	35.2059	34.9191	34.9251		34.8333	5
34.026	5	34.7398	34.2267	34.2141		34.6972	5	35.293	35.1481	35.1907		33.1226	4	32.928	32.8783	32.835		34.2898	5	34.1377	34.0724	34.1902		33.0547	5	33.1166	32.9357	32.9036		35.39	4	34.8631	35.1834	35.1573		33.9098	5	34.2089	34.0852	34.1192		35.4445	6	35.2105	34.9265	34.9321		34.8317	5
34.0312	5	34.7335	34.2232	34.2111		34.6875	4	35.2987	35.1553	35.1974		33.1099	4	32.9323	32.8816	32.8382		34.2826	5	34.1333	34.0679	34.1862		33.0531	5	33.1092	32.9308	32.8986		35.3551	5	34.8589	35.1762	35.1498		33.9062	5	34.2053	34.0806	34.1146		35.4539	6	35.2151	34.9338	34.9392		34.8282	5
34.0363	5	34.7273	34.2198	34.2081		34.6647	5	35.2922	35.1491	35.192		33.1007	4	32.9366	32.8848	32.8415		34.2863	6	34.143	34.0786	34.1955		33.0477	5	33.1018	32.9259	32.8936		35.3207	5	34.8547	35.1689	35.1422		33.8999	5	34.2017	34.0762	34.11		35.4575	6	35.2197	34.9411	34.9461		34.8218	5
34.0369	5	34.7211	34.2164	34.2051		34.6433	5	35.2858	35.1431	35.1867		33.0849	4	32.9409	32.888	32.8447		34.2744	6	34.1528	34.0892	34.2047		33.0477	5	33.0945	32.921	32.8887		35.3023	5	34.8506	35.1617	35.1348		33.8908	5	34.1981	34.0717	34.1054		35.4644	6	35.2243	34.9483	34.9531		34.8141	5
34.0315	5	34.7149	34.2131	34.2022		34.6321	5	35.2794	35.137	35.1814		33.0632	4	32.9452	32.8912	32.8479		34.2689	4	34.1625	34.0998	34.2139		33.0475	5	33.0873	32.9162	32.8838		35.287	5	34.8464	35.1545	35.1273		33.8875	5	34.1946	34.0673	34.1009		35.4673	6	35.2289	34.9554	34.9599		34.8103	5
34.0242	5	34.7087	34.2098	34.1994		34.6302	5	35.273	35.131	35.1762		33.0487	4	32.9494	32.8944	32.8511		34.2602	4	34.1721	34.1103	34.223		33.0445	5	33.0801	32.9114	32.879		35.2614	5	34.8423	35.1472	35.12		33.8829	5	34.1911	34.0629	34.0964		35.4715	6	35.2335	34.9625	34.9668		34.8044	5
34.0216	4	34.7138	34.2176	34.2066		34.6343	5	35.2667	35.1251	35.171		33.0504	4	32.9537	32.8975	32.8543		34.2498	4	34.1818	34.1208	34.2321		33.0435	5	33.0729	32.9067	32.8743		35.2423	5	34.8381	35.1401	35.1126		33.8841	5	34.1876	34.0585	34.0919		35.4702	6	35.238	34.9696	34.9735		34.7995	5
34.0217	5	34.7077	34.2143	34.2037		34.6391	5	35.2604	35.1192	35.1658		33.0554	4	32.9579	32.9006	32.8574		34.2459	5	34.177	34.1159	34.2277		33.0416	5	33.0658	32.902	32.8695		35.2284	5	34.834	35.1329	35.1053		33.8814	5	34.1841	34.0541	34.0874		35.4641	6	35.2426	34.9766	34.9802		34.7939	5
34.0196	5	34.7016	34.211	34.2008		34.6416	5	35.2541	35.1133	35.1607		33.0528	4	32.9621	32.9037	32.8606		34.243	5	34.1723	34.1111	34.2233		33.0295	4	33.0726	32.9098	32.8762		35.2142	5	34.8298	35.1257	35.0981		33.8828	5	34.1806	34.0498	34.083		35.4674	6	35.2471	34.9835	34.9869		34.7948	5
34.0205	5	34.6955	34.2077	34.1979		34.6452	5	35.2478	35.1075	35.1557		33.0594	4	32.9663	32.9068	32.8637		34.2456	5	34.1676	34.1064	34.2189		33.0147	5	33.0654	32.9051	32.8714		35.2054	5	34.8257	35.1186	35.0909		33.8795	5	34.1772	34.0456	34.0786		35.4673	6	35.2516	34.9904	34.9935		34.7958	5
34.0203	5	34.6894	34.2045	34.1951		34.6492	5	35.2416	35.1017	35.1507		33.0603	4	32.9705	32.9098	32.8668		34.2542	5	34.163	34.1016	34.2145		33.0079	5	33.0584	32.9004	32.8667		35.1836	5	34.8216	35.1114	35.0838		33.8781	5	34.1738	34.0413	34.0743		35.4649	6	35.2561	34.9973	35.0001		34.7989	5
34.0242	5	34.6834	34.2013	34.1924		34.6549	5	35.2354	35.0959	35.1457		33.0608	4	32.9746	32.9129	32.8699		34.2721	4	34.1726	34.1121	34.2237		32.9968	5	33.0514	32.8958	32.8621		35.1676	5	34.8175	35.1043	35.0767		33.8758	5	34.1704	34.0371	34.07		35.4605	6	35.2606	35.0041	35.0066		34.7974	5
34.0226	5	34.6775	34.1981	34.1897		34.6534	5	35.2292	35.0902	35.1408		33.0635	4	32.9788	32.9159	32.8729		34.2835	5	34.168	34.1073	34.2193		32.9909	5	33.0444	32.8913	32.8575		35.164	5	34.8134	35.0972	35.0696		33.8708	5	34.1671	34.0329	34.0657		35.4574	6	35.2651	35.0108	35.013		34.7965	5
34.0267	5	34.6715	34.1951	34.187		34.6545	5	35.223	35.0846	35.136		33.0651	4	32.9829	32.9189	32.876		34.2938	5	34.1633	34.1026	34.2149		32.9884	5	33.0374	32.8868	32.8529		35.1576	5	34.8093	35.0901	35.0626		33.8637	5	34.1638	34.0288	34.0614		35.456	6	35.2695	35.0176	35.0195		34.7992	5
34.0197	5	34.6656	34.192	34.1844		34.6573	4	35.229	35.0921	35.143		33.0717	4	32.987	32.9218	32.879		34.2945	5	34.1587	34.0979	34.2106		32.9877	5	33.0305	32.8823	32.8484		35.1444	5	34.8052	35.083	35.0556		33.8587	5	34.1604	34.0246	34.0572		35.4559	6	35.274	35.0242	35.0258		34.8	5
34.0135	5	34.6597	34.189	34.1818		34.6444	4	35.2349	35.0995	35.1499		33.0886	4	32.9912	32.9248	32.8821		34.3142	5	34.1541	34.0933	34.2064		32.9837	5	33.0237	32.8779	32.8439		35.1351	5	34.8011	35.0759	35.0487		33.8591	5	34.1571	34.0206	34.053		35.4585	6	35.2784	35.0308	35.0321		34.8033	5
33.9978	5	34.6539	34.186	34.1792		34.6301	5	35.2287	35.0938	35.1449		33.0988	4	32.9953	32.9277	32.8851		34.3192	5	34.1496	34.0886	34.2022		32.9839	5	33.0169	32.8735	32.8395		35.1361	5	34.797	35.0689	35.0418		33.8569	5	34.1539	34.0165	34.0488		35.4551	4	35.2828	35.0374	35.0384		34.8088	5
33.9898	5	34.6481	34.1831	34.1767		34.6253	5	35.2225	35.0881	35.14		33.1007	4	32.9993	32.9306	32.8881		34.318	5	34.145	34.0841	34.198		32.9814	5	33.0101	32.8692	32.8351		35.1322	5	34.7929	35.0618	35.035		33.8599	5	34.1506	34.0125	34.0447		35.4187	4	35.2872	35.0439	35.0446		34.821	5
33.9813	5	34.6423	34.1803	34.1742		34.6239	5	35.2164	35.0824	35.1351		33.0976	4	33.0034	32.9335	32.891		34.3148	5	34.1406	34.0795	34.1938		32.9799	5	33.0034	32.8649	32.8308		35.1245	5	34.7888	35.0548	35.0282		33.8637	5	34.1474	34.0085	34.0406		35.378	4	35.2916	35.0504	35.0508		34.8385	6
33.9772	5	34.6365	34.1774	34.1718		34.6298	5	35.2103	35.0769	35.1302		33.0967	4	33.0075	32.9363	32.894		34.3026	5	34.1361	34.075	34.1897		32.9785	5	32.9967	32.8607	32.8265		35.1145	5	34.7848	35.0478	35.0215		33.8685	5	34.1442	34.0045	34.0365		35.3435	4	35.296	35.0568	35.057		34.862	6
33.9691	4	34.6418	34.1855	34.1791		34.6361	5	35.2042	35.0713	35.1254		33.0923	4	33.0115	32.9392	32.8969		34.3056	5	34.1317	34.0706	34.1857		32.9678	5	32.9901	32.8565	32.8222		35.1045	5	34.7807	35.0408	35.0148		33.863	5	34.141	34.0005	34.0325		35.3149	4	35.3004	35.0632	35.063		34.8927	6
33.9563	5	34.6361	34.1825	34.1766		34.6401	5	35.1982	35.0658	35.1207		33.0748	5	33.0041	32.9291	32.884		34.2982	5	34.1273	34.0662	34.1816		32.9531	4	32.9972	32.8645	32.8291		35.0961	5	34.7767	35.0338	35.0081		33.8559	5	34.1378	33.9966	34.0284		35.2916	5	35.2953	35.0571	35.0569		34.9329	6
33.9387	5	34.6304	34.1796	34.1741		34.6486	5	35.1921	35.0603	35.1159		33.0515	5	32.9968	32.9191	32.8712		34.293	5	34.1229	34.0618	34.1777		32.9385	5	32.9905	32.8603	32.8248		35.0962	5	34.7726	35.0268	35.0014		33.8489	5	34.1347	33.9927	34.0244		35.2726	5	35.2903	35.0511	35.0507		34.9749	6
33.9371	5	34.6247	34.1768	34.1716		34.6565	5	35.1861	35.0549	35.1113		33.0276	5	32.9895	32.9092	32.8586		34.2887	5	34.1186	34.0574	34.1737		32.9278	5	32.9839	32.8561	32.8206		35.0958	5	34.7686	35.0198	34.9949		33.8453	5	34.1316	33.9889	34.0205		35.2616	5	35.2852	35.0451	35.0446		35.007	6
33.9356	5	34.619	34.174	34.1692		34.6626	5	35.1802	35.0495	35.1066		33.0054	5	32.9823	32.8994	32.8462		34.2859	5	34.1143	34.0531	34.1698		32.9206	5	32.9774	32.852	32.8164		35.0992	5	34.7645	35.0129	34.9883		33.8466	5	34.1285	33.9851	34.0165		35.2476	5	35.2802	35.0391	35.0385		35.0284	6
33.9361	5	34.6134	34.1712	34.1668		34.6594	5	35.1742	35.0441	35.102		32.9851	5	32.975	32.8897	32.8339		34.2842	5	34.11	34.0489	34.166		32.9136	5	32.9709	32.8479	32.8122		35.1053	5	34.7605	35.0059	34.9818		33.8502	5	34.1254	33.9813	34.0126		35.237	5	35.2752	35.0332	35.0325		35.0398	6
33.9333	5	34.6078	34.1685	34.1645		34.6561	5	35.1683	35.0388	35.0975		32.9667	5	32.9679	32.88	32.8218		34.2921	5	34.1057	34.0446	34.1621		32.9078	5	32.9644	32.8438	32.8081		35.107	5	34.7564	34.999	34.9754		33.8504	5	34.1223	33.9775	34.0088		35.2447	5	35.2702	35.0272	35.0266		35.0598	6
33.9362	5	34.6022	34.1658	34.1622		34.658	5	35.1624	35.0335	35.093		32.9529	5	32.9607	32.8704	32.8099		34.2834	5	34.1015	34.0404	34.1583		32.9082	5	32.958	32.8398	32.804		35.105	5	34.7524	34.9921	34.969		33.8516	5	34.1193	33.9738	34.0049		35.2502	4	35.2747	35.0338	35.0329		35.0736	6
33.936	5	34.5967	34.1631	34.1599		34.6596	5	35.1565	35.0282	35.0885		32.9416	5	32.9536	32.8609	32.7981		34.2807	5	34.0973	34.0362	34.1546		32.907	5	32.9516	32.8358	32.8		35.0936	5	34.7484	34.9852	34.9626		33.8579	5	34.1163	33.97	34.0011		35.2368	4	35.2791	35.0403	35.0391		35.1008	6
33.9379	5	34.5912	34.1604	34.1577		34.6613	5	35.1507	35.023	35.0841		32.9295	5	32.9465	32.8515	32.7865		34.2856	5	34.0932	34.0321	34.1508		32.9081	5	32.9452	32.8318	32.796		35.0893	5	34.7444	34.9783	34.9563		33.8663	5	34.1133	33.9664	33.9973		35.2251	5	35.2741	35.0344	35.0331		35.1204	6
33.9406	5	34.5857	34.1578	34.1555		34.6637	5	35.1448	35.0179	35.0797		32.9188	5	32.9395	32.8422	32.775		34.28	4	34.1031	34.043	34.1603		32.9099	5	32.9389	32.8279	32.7921		35.0902	5	34.7404	34.9714	34.95		33.8687	5	34.1103	33.9627	33.9935		35.2233	5	35.2691	35.0284	35.0271		35.1361	6
33.9404	5	34.5803	34.1553	34.1533		34.6661	5	35.139	35.0127	35.0754		32.9079	5	32.9325	32.8329	32.7637		34.2777	5	34.0989	34.0388	34.1565		32.9084	5	32.9327	32.8241	32.7881		35.0871	5	34.7364	34.9646	34.9437		33.8663	5	34.1073	33.9591	33.9898		35.2245	5	35.2642	35.0225	35.0212		35.1635	6
33.9295	5	34.5749	34.1527	34.1512		34.6714	4	35.1452	35.0206	35.0826		32.9041	5	32.9255	32.8237	32.7526		34.2537	5	34.0947	34.0346	34.1527		32.9086	4	32.9399	32.8323	32.7952		35.086	5	34.7324	34.9577	34.9375		33.8654	5	34.1044	33.9555	33.986		35.2309	5	35.2592	35.0167	35.0153		35.1686	6
33.9253	5	34.5695	34.1502	34.1491		34.665	5	35.1394	35.0155	35.0782		32.8954	5	32.9185	32.8146	32.7416		34.2378	5	34.0906	34.0305	34.149		32.9133	4	32.9472	32.8404	32.8022		35.0777	5	34.7284	34.9509	34.9313		33.8621	5	34.1015	33.952	33.9824		35.2357	5	35.2542	35.0108	35.0095		35.1611	6
33.9223	5	34.5641	34.1477	34.147		34.6489	5	35.1336	35.0104	35.0738		32.8864	5	32.9116	32.8056	32.7308		34.2348	5	34.0865	34.0264	34.1454		32.9276	4	32.9544	32.8486	32.8092		35.0715	5	34.7244	34.9441	34.9252		33.8591	5	34.0986	33.9484	33.9787		35.242	5	35.2493	35.005	35.0037		35.1543	6
33.9124	5	34.5588	34.1453	34.145		34.6373	5	35.1279	35.0053	35.0695		32.882	5	32.9048	32.7966	32.7201		34.2379	5	34.0824	34.0224	34.1417		32.9452	4	32.9616	32.8566	32.8161		35.0725	5	34.7204	34.9373	34.9191		33.856	5	34.0957	33.9449	33.975		35.2434	5	35.2444	34.9992	34.9979		35.1481	6
33.9051	5	34.5535	34.1429	34.143		34.6283	5	35.1222	35.0003	35.0652		32.8761	5	32.8979	32.7877	32.7096		34.238	5	34.0783	34.0184	34.1381		32.9717	4	32.9688	32.8647	32.823		35.0723	5	34.7164	34.9305	34.913		33.8542	5	34.0928	33.9415	33.9714		35.2404	5	35.2395	34.9935	34.9922		35.1482	6
33.903	5	34.5482	34.1405	34.141		34.6268	5	35.1165	34.9953	35.061		32.8676	5	32.8911	32.7789	32.6992		34.2356	5	34.0743	34.0144	34.1346		33.0135	4	32.976	32.8727	32.8299		35.0768	5	34.7125	34.9237	34.907		33.8539	5	34.09	33.938	33.9678		35.2506	5	35.2346	34.9878	34.9865		35.1736	4
33.9011	5	34.543	34.1381	34.139		34.6292	5	35.1108	34.9904	35.0568		32.8649	5	32.8843	32.7702	32.689		34.2367	5	34.0703	34.0104	34.131		33.032	4	32.9831	32.8806	32.8368		35.0799	5	34.7085	34.9169	34.901		33.8567	5	34.0872	33.9346	33.9643		35.2549	4	35.2391	34.9946	34.993		35.1923	4
33.9033	5	34.5377	34.1358	34.1371		34.6383	5	35.1051	34.9855	35.0526		32.8615	5	32.8776	32.7615	32.6789		34.2402	5	34.0663	34.0065	34.1275		33.0187	4	32.9902	32.8886	32.8436		35.0905	5	34.7045	34.9102	34.8951		33.861	5	34.0843	33.9312	33.9607		35.2388	5	35.2342	34.9889	34.9873		35.1781	4
33.9087	5	34.5326	34.1335	34.1352		34.6478	5	35.0995	34.9806	35.0485		32.8556	5	32.8709	32.7529	32.669		34.242	5	34.0624	34.0027	34.1241		32.9923	4	32.9973	32.8964	32.8504		35.0981	5	34.7006	34.9034	34.8891		33.8669	5	34.0816	33.9279	33.9572		35.2277	5	35.2294	34.9832	34.9817		35.1348	4
33.9112	5	34.5274	34.1312	34.1334		34.6526	5	35.0939	34.9758	35.0444		32.8537	5	32.8642	32.7443	32.6592		34.2437	5	34.0585	33.9988	34.1207		32.9631	4	33.0043	32.9043	32.8571		35.1081	5	34.6966	34.8967	34.8832		33.8724	5	34.0788	33.9245	33.9537		35.2233	5	35.2245	34.9775	34.976		35.0819	4
33.9162	5	34.5223	34.1289	34.1315		34.6598	5	35.0883	34.9711	35.0403		32.8501	5	32.8575	32.7359	32.6496		34.2453	5	34.0546	33.995	34.1173		32.9391	4	33.0113	32.9121	32.8638		35.1152	5	34.6927	34.89	34.8774		33.8794	5	34.076	33.9212	33.9503		35.2232	5	35.2196	34.9719	34.9704		35.0316	5
33.9164	5	34.5172	34.1267	34.1297		34.6691	5	35.0827	34.9663	35.0363		32.8464	5	32.8509	32.7275	32.6401		34.2399	5	34.0507	33.9912	34.1139		32.9236	5	33.0046	32.9075	32.8592		35.121	5	34.6888	34.8833	34.8716		33.8792	5	34.0733	33.9179	33.9468		35.2256	5	35.2148	34.9663	34.9649		34.9829	5
33.9144	5	34.5121	34.1245	34.1279		34.6777	5	35.0772	34.9616	35.0323		32.8419	5	32.8443	32.7192	32.6307		34.242	5	34.0469	33.9875	34.1106		32.9116	5	32.9979	32.9029	32.8546		35.1267	5	34.6848	34.8766	34.8658		33.8736	5	34.0706	33.9147	33.9434		35.2275	5	35.2099	34.9607	34.9594		34.952	5
33.9023	5	34.507	34.1223	34.1262		34.6843	5	35.0717	34.957	35.0284		32.8382	4	32.8489	32.7235	32.635		34.2314	5	34.0431	33.9837	34.1073		32.9025	5	32.9913	32.8984	32.85		35.1256	5	34.6809	34.8699	34.86		33.87	5	34.0679	33.9114	33.94		35.2252	5	35.2051	34.9552	34.9539		34.9301	5
33.8964	4	34.5128	34.1306	34.1337		34.6953	5	35.0662	34.9524	35.0245		32.8342	5	32.8424	32.7152	32.6257		34.2302	5	34.0393	33.9801	34.104		32.8952	5	32.9847	32.8939	32.8455		35.1192	4	34.6873	34.8824	34.8708		33.8668	5	34.0652	33.9082	33.9367		35.2264	5	35.2003	34.9496	34.9484		34.9073	5
33.8925	4	34.5185	34.1389	34.1412		34.7074	6	35.0726	34.9606	35.0319		32.8222	5	32.8358	32.707	32.6166		34.2408	5	34.0355	33.9764	34.1008		32.8918	5	32.9781	32.8895	32.8411		35.101	5	34.6834	34.8757	34.865		33.8664	5	34.0625	33.905	33.9334		35.2168	5	35.1955	34.9441	34.943		34.8851	5
33.8814	5	34.5134	34.1365	34.1392		34.7186	6	35.079	34.9688	35.0392		32.8214	5	32.8293	32.6988	32.6076		34.251	5	34.0318	33.9728	34.0976		32.889	5	32.9716	32.8851	32.8367		35.0958	5	34.6795	34.8691	34.8592		33.8691	5	34.0599	33.9018	33.9301		35.2106	4	35.2002	34.9512	34.9498		34.8625	5
33.8748	5	34.5083	34.1341	34.1372		34.735	6	35.0854	34.9769	35.0465		32.8241	5	32.8228	32.6907	32.5987		34.2384	5	34.0281	33.9692	34.0945		32.8885	4	32.9787	32.893	32.8435		35.0826	5	34.6755	34.8624	34.8535		33.8723	5	34.0573	33.8987	33.9268		35.1931	5	35.1954	34.9457	34.9444		34.8389	5
33.8777	5	34.5033	34.1318	34.1353		34.7369	4	35.0917	34.985	35.0538		32.8274	5	32.8164	32.6827	32.59		34.2317	5	34.0244	33.9656	34.0913		32.8948	4	32.9859	32.9008	32.8502		35.0727	5	34.6716	34.8558	34.8478		33.8767	5	34.0547	33.8956	33.9235		35.1834	5	35.1906	34.9403	34.939		34.8253	4
33.8769	5	34.4983	34.1295	34.1334		34.7272	4	35.0981	34.9931	35.061		32.8264	5	32.81	32.6748	32.5813		34.2413	5	34.0207	33.9621	34.0882		32.9152	4	32.993	32.9087	32.857		35.068	5	34.6677	34.8492	34.8421		33.8806	5	34.0521	33.8925	33.9203		35.1853	5	35.1858	34.9348	34.9336		34.8034	5
33.8755	5	34.4933	34.1272	34.1315		34.7266	4	35.1044	35.0011	35.0682		32.818	5	32.8036	32.6669	32.5728		34.2384	5	34.0171	33.9586	34.0851		32.9438	4	33	32.9165	32.8637		35.0636	5	34.6638	34.8425	34.8365		33.8775	5	34.0495	33.8894	33.9171		35.1926	5	35.1811	34.9294	34.9283		34.7816	5
33.8805	4	34.4991	34.1355	34.139		34.7368	4	35.1107	35.009	35.0754		32.8088	5	32.7972	32.6591	32.5645		34.2439	6	34.0273	33.9698	34.0949		32.9719	4	33.0071	32.9242	32.8704		35.0636	5	34.6599	34.8359	34.8309		33.8727	5	34.0469	33.8863	33.9139		35.1924	5	35.1763	34.924	34.923		34.7798	5
33.88	5	34.4941	34.1331	34.137		34.7395	4	35.117	35.0169	35.0825		32.8008	5	32.7909	32.6513	32.5562		34.2352	6	34.0375	33.981	34.1046		33.0025	4	33.0141	32.9319	32.877		35.0635	5	34.656	34.8294	34.8253		33.8688	5	34.0444	33.8833	33.9108		35.1884	5	35.1716	34.9187	34.9178		34.7755	5
33.8874	5	34.4892	34.1308	34.135		34.7444	4	35.1232	35.0248	35.0896		32.7969	5	32.7846	32.6436	32.548		34.2375	6	34.0476	33.9921	34.1142		33.0329	4	33.021	32.9396	32.8836		35.0602	4	34.6625	34.8424	34.8364		33.8682	5	34.0419	33.8803	33.9076		35.186	5	35.1669	34.9133	34.9125		34.7745	5
33.8938	5	34.4843	34.1285	34.1331		34.7422	4	35.1295	35.0326	35.0966		32.7988	5	32.7784	32.636	32.54		34.2711	4	34.0577	34.0032	34.1238		33.0616	4	33.028	32.9473	32.8902		35.0546	4	34.669	34.8552	34.8474		33.8732	5	34.0393	33.8773	33.9045		35.1872	5	35.1622	34.9081	34.9073		34.7712	5
33.894	5	34.4793	34.1262	34.1312		34.7434	4	35.1357	35.0404	35.1036		32.7984	5	32.7721	32.6284	32.532		34.2821	4	34.0678	34.0142	34.1333		33.0926	4	33.0349	32.9549	32.8968		35.0628	4	34.6755	34.8679	34.8582		33.8748	5	34.0368	33.8743	33.9014		35.1888	5	35.1575	34.9028	34.9022		34.7567	5
33.886	5	34.4745	34.124	34.1293		34.7381	4	35.1419	35.0481	35.1106		32.7932	5	32.7659	32.6209	32.5242		34.2684	4	34.0778	34.0252	34.1428		33.1221	4	33.0418	32.9624	32.9033		35.0656	5	34.6716	34.8613	34.8524		33.8753	5	34.0344	33.8714	33.8983		35.1855	5	35.1528	34.8975	34.8971		34.745	5
33.8933	5	34.4696	34.1218	34.1274		34.7248	4	35.1481	35.0558	35.1175		32.7841	5	32.7598	32.6135	32.5165		34.2477	5	34.0738	34.0211	34.1391		33.133	4	33.0487	32.97	32.9098		35.064	5	34.6677	34.8546	34.8467		33.8785	5	34.0319	33.8685	33.8953		35.1935	5	35.1481	34.8923	34.892		34.7381	5
33.9035	5	34.4648	34.1196	34.1256		34.7195	5	35.1423	35.0504	35.1124		32.7769	5	32.7536	32.6061	32.5089		34.2286	5	34.0698	34.0171	34.1354		33.1148	4	33.0556	32.9775	32.9162		35.0683	5	34.6638	34.848	34.841		33.8854	5	34.0295	33.8655	33.8923		35.1931	4	35.1529	34.8998	34.8991		34.7281	5
33.9113	5	34.46	34.1175	34.1238		34.7147	4	35.1484	35.0581	35.1194		32.7769	5	32.7475	32.5988	32.5013		34.2276	5	34.0658	34.0132	34.1318		33.0848	4	33.0624	32.9849	32.9227		35.0701	5	34.6599	34.8414	34.8353		33.897	5	34.027	33.8627	33.8893		35.1771	5	35.1482	34.8945	34.894		34.7229	5
33.9173	5	34.4552	34.1154	34.122		34.7066	5	35.1426	35.0527	35.1143		32.7765	5	32.7414	32.5915	32.4939		34.2199	5	34.0619	34.0092	34.1281		33.0519	4	33.0692	32.9923	32.9291		35.073	5	34.656	34.8348	34.8297		33.9026	5	34.0246	33.8598	33.8863		35.1662	5	35.1436	34.8893	34.8889		34.7118	5
33.9255	5	34.4505	34.1134	34.1203		34.7078	5	35.1368	35.0473	35.1093		32.7692	4	32.7464	32.5967	32.4989		34.2132	5	34.058	34.0053	34.1246		33.022	4	33.076	32.9997	32.9354		35.0701	5	34.6521	34.8282	34.8241		33.9057	5	34.0222	33.8569	33.8833		35.1604	5	35.1389	34.8842	34.8839		34.6989	4
33.9169	5	34.4458	34.1114	34.1186		34.7169	4	35.143	35.055	35.1162		32.7499	4	32.7513	32.6018	32.5039		34.2007	5	34.0541	34.0015	34.121		32.9955	4	33.0828	33.0071	32.9417		35.067	5	34.6482	34.8216	34.8185		33.9063	5	34.0198	33.8541	33.8803		35.1602	5	35.1343	34.879	34.8789		34.6801	4
33.9081	4	34.4517	34.1198	34.1261		34.7118	5	35.1372	35.0497	35.1111		32.7401	5	32.7452	32.5945	32.4964		34.2027	5	34.0502	33.9976	34.1175		32.9705	5	33.0756	33.0017	32.9363		35.0616	5	34.6443	34.8151	34.813		33.9119	5	34.0175	33.8513	33.8774		35.1618	5	35.1296	34.8739	34.8739		34.6574	5
33.9032	5	34.447	34.1177	34.1243		34.7084	5	35.1315	35.0443	35.1061		32.7348	5	32.7391	32.5872	32.4891		34.198	5	34.0464	33.9939	34.114		32.9496	5	33.0684	32.9963	32.931		35.055	5	34.6404	34.8085	34.8075		33.9161	5	34.0151	33.8485	33.8745		35.1599	5	35.125	34.8688	34.8689		34.6552	5
33.8972	5	34.4423	34.1156	34.1225		34.7006	5	35.1257	35.0391	35.1011		32.7312	5	32.7331	32.5801	32.4818		34.1979	5	34.0426	33.9901	34.1106		32.9314	5	33.0613	32.991	32.9256		35.0486	5	34.6366	34.802	34.802		33.9183	5	34.0128	33.8457	33.8716		35.1493	5	35.1204	34.8637	34.864		34.6632	4
33.8991	5	34.4376	34.1136	34.1207		34.698	5	35.12	35.0339	35.0962		32.7296	5	32.7271	32.5729	32.4747		34.1964	5	34.0388	33.9864	34.1072		32.9218	5	33.0543	32.9858	32.9204		35.0461	5	34.6327	34.7955	34.7966		33.9212	5	34.0105	33.843	33.8688		35.1444	5	35.1158	34.8587	34.8592		34.6612	5
33.9092	5	34.433	34.1117	34.1189		34.7006	5	35.1143	35.0287	35.0913		32.7312	5	32.7211	32.5659	32.4676		34.1973	5	34.035	33.9827	34.1039		32.91	5	33.0473	32.9806	32.9151		35.0444	5	34.6289	34.789	34.7912		33.9171	5	34.0082	33.8402	33.8659		35.1426	5	35.1112	34.8537	34.8543		34.6572	5
33.9193	5	34.4283	34.1097	34.1172		34.7077	5	35.1086	35.0236	35.0865		32.7323	5	32.7152	32.5588	32.4607		34.1925	5	34.0313	33.979	34.1006		32.9023	5	33.0403	32.9755	32.91		35.0378	5	34.625	34.7825	34.7858		33.9083	5	34.0059	33.8375	33.8631		35.1403	5	35.1067	34.8487	34.8495		34.6603	5
33.9253	5	34.4237	34.1078	34.1155		34.7128	5	35.103	35.0185	35.0817		32.7296	5	32.7092	32.5519	32.4538		34.1916	6	34.0415	33.9902	34.1103		32.8942	5	33.0334	32.9704	32.9049		35.0364	5	34.6212	34.776	34.7805		33.9022	5	34.0036	33.8348	33.8603		35.1418	5	35.1021	34.8437	34.8448		34.6598	5
33.9288	5	34.4192	34.106	34.1138		34.7146	5	35.0974	35.0134	35.077		32.7155	5	32.7033	32.545	32.447		34.1852	6	34.0516	34.0013	34.1199		32.8906	5	33.0266	32.9653	32.8998		35.0414	5	34.6173	34.7696	34.7752		33.8999	5	34.0014	33.8321	33.8575		35.1453	5	35.0976	34.8388	34.84		34.6635	5
33.9338	5	34.4146	34.1041	34.1122		34.7172	5	35.0918	35.0085	35.0723		32.7021	5	32.6975	32.5381	32.4404		34.1984	6	34.0617	34.0123	34.1294		32.8799	5	33.0197	32.9604	32.8948		35.0459	5	34.6135	34.7631	34.7699		33.8972	5	33.9991	33.8295	33.8547		35.1496	5	35.093	34.8339	34.8354		34.6739	5
33.9368	5	34.4101	34.1024	34.1106		34.7173	5	35.0862	35.0035	35.0676		32.6907	5	32.6916	32.5313	32.4338		34.2217	6	34.0717	34.0233	34.139		32.8677	5	33.013	32.9554	32.8898		35.0488	5	34.6097	34.7567	34.7647		33.8967	5	33.9969	33.8268	33.852		35.1494	5	35.0885	34.829	34.8307		34.6713	5
33.943	5	34.4056	34.1006	34.109		34.7209	5	35.0806	34.9986	35.063		32.6845	5	32.6858	32.5246	32.4273		34.2369	6	34.0818	34.0342	34.1484		32.8632	5	33.0062	32.9505	32.8849		35.0481	5	34.6058	34.7503	34.7594		33.8966	5	33.9947	33.8242	33.8492		35.1345	5	35.084	34.8241	34.8261		34.6616	5
33.9386	5	34.4011	34.0989	34.1074		34.7136	5	35.0751	34.9938	35.0584		32.6767	5	32.68	32.5179	32.4209		34.2647	6	34.0917	34.0451	34.1579		32.8604	5	32.9995	32.9457	32.8801		35.056	5	34.602	34.7438	34.7543		33.8981	5	33.9925	33.8216	33.8465		35.117	5	35.0795	34.8193	34.8215		34.6521	5
33.9363	5	34.3967	34.0972	34.1059		34.7044	5	35.0696	34.989	35.0539		32.6743	5	32.6743	32.5113	32.4146		34.282	6	34.1017	34.0559	34.1673		32.859	5	32.9929	32.9409	32.8752		35.0583	5	34.5982	34.7375	34.7491		33.9014	5	33.9903	33.819	33.8438		35.1116	5	35.075	34.8145	34.8169		34.6452	5
33.9376	5	34.3922	34.0955	34.1043		34.7008	5	35.0641	34.9842	35.0494		32.6725	5	32.6686	32.5047	32.4084		34.314	6	34.1115	34.0666	34.1766		32.8591	5	32.9863	32.9362	32.8705		35.0554	5	34.5944	34.7311	34.744		33.901	5	33.9881	33.8164	33.8411		35.1084	5	35.0706	34.8097	34.8124		34.6422	5
33.9427	5	34.3878	34.0938	34.1029		34.7037	4	35.0705	34.9923	35.0565		32.6735	5	32.6629	32.4982	32.4022		34.3378	6	34.1214	34.0773	34.1859		32.8589	5	32.9797	32.9315	32.8657		35.0567	5	34.5906	34.7247	34.7389		33.9035	5	33.986	33.8139	33.8385		35.1011	5	35.0661	34.805	34.8079		34.6453	5
33.9487	5	34.3834	34.0922	34.1014		34.7067	4	35.0769	35.0004	35.0636		32.6668	5	32.6572	32.4917	32.3962		34.3616	6	34.1312	34.088	34.1952		32.8585	5	32.9732	32.9268	32.8611		35.0641	5	34.5868	34.7184	34.7338		33.9104	5	33.9838	33.8113	33.8358		35.1027	5	35.0616	34.8002	34.8034		34.6481	5
33.9523	5	34.3791	34.0906	34.0999		34.707	4	35.0833	35.0084	35.0707		32.6519	5	32.6516	32.4853	32.3902		34.392	6	34.141	34.0986	34.2044		32.8598	5	32.9667	32.9222	32.8564		35.0608	5	34.583	34.712	34.7288		33.9192	5	33.9817	33.8088	33.8332		35.1051	5	35.0572	34.7955	34.799		34.6514	5
33.9549	5	34.3747	34.089	34.0985		34.7119	4	35.0897	35.0164	35.0777		32.6394	5	32.6459	32.4789	32.3843		34.4127	6	34.1507	34.1091	34.2136		32.8562	5	32.9602	32.9177	32.8518		35.0626	5	34.5792	34.7057	34.7238		33.923	5	33.9796	33.8063	33.8306		35.1013	5	35.0528	34.7909	34.7946		34.6528	5
33.9526	5	34.3704	34.0875	34.0971		34.7316	4	35.096	35.0243	35.0847		32.6297	5	32.6403	32.4726	32.3785		34.4532	6	34.1605	34.1196	34.2227		32.8465	5	32.9538	32.9132	32.8473		35.0716	5	34.5754	34.6994	34.7188		33.9245	5	33.9775	33.8038	33.828		35.097	5	35.0483	34.7862	34.7902		34.6567	5
33.94	5	34.3661	34.086	34.0957		34.7437	4	35.1024	35.0322	35.0916		32.6178	5	32.6348	32.4663	32.3728		34.4581	6	34.1701	34.13	34.2318		32.8391	5	32.9475	32.9087	32.8428		35.0763	4	34.5822	34.7142	34.7309		33.9233	5	33.9754	33.8014	33.8254		35.0906	5	35.0439	34.7816	34.7859		34.6587	5
33.9361	5	34.3619	34.0845	34.0944		34.7598	4	35.1087	35.04	35.0986		32.6061	5	32.6293	32.46	32.3671		34.46	6	34.1798	34.1404	34.2409		32.8301	5	32.9412	32.9043	32.8383		35.0676	4	34.5889	34.7288	34.7428		33.9224	5	33.9733	33.7989	33.8229		35.0901	5	35.0395	34.7769	34.7816		34.6578	5
33.9391	5	34.3576	34.083	34.0931		34.7821	4	35.115	35.0478	35.1054		32.6039	5	32.6237	32.4539	32.3616		34.4547	6	34.1893	34.1507	34.2499		32.823	5	32.9349	32.8999	32.8339		35.0658	5	34.5851	34.7224	34.7377		33.9224	5	33.9713	33.7965	33.8203		35.0921	5	35.0352	34.7723	34.7773		34.6526	5
33.9402	5	34.3534	34.0816	34.0918		34.7974	4	35.1212	35.0555	35.1123		32.6047	5	32.6183	32.4477	32.356		34.45	6	34.1989	34.161	34.2588		32.8219	5	32.9286	32.8956	32.8296		35.0661	5	34.5813	34.7161	34.7326		33.9159	5	33.9692	33.7941	33.8178		35.0905	5	35.0308	34.7678	34.773		34.6419	4
33.9429	4	34.3597	34.0902	34.0994		34.8007	4	35.1275	35.0632	35.1191		32.6093	5	32.6128	32.4417	32.3506		34.4468	6	34.2084	34.1712	34.2678		32.8152	5	32.9224	32.8913	32.8252		35.076	5	34.5775	34.7098	34.7276		33.9142	5	33.9672	33.7917	33.8153		35.0953	5	35.0264	34.7632	34.7688		34.6326	5
33.9583	5	34.3554	34.0887	34.098		34.8063	4	35.1337	35.0708	35.1258		32.5933	5	32.6074	32.4356	32.3453		34.441	4	34.2179	34.1814	34.2766		32.8092	5	32.9163	32.8871	32.821		35.0812	5	34.5737	34.7034	34.7226		33.9122	5	33.9652	33.7893	33.8128		35.0994	5	35.0221	34.7587	34.7646		34.6158	5
33.9443	5	34.3512	34.0872	34.0966		34.8262	4	35.1399	35.0784	35.1326		32.5929	5	32.602	32.4297	32.34		34.4109	4	34.2274	34.1915	34.2855		32.8083	5	32.9102	32.8829	32.8167		35.0832	5	34.57	34.6971	34.7176		33.9149	5	33.9632	33.787	33.8104		35.0968	5	35.0177	34.7542	34.7604		34.6066	5
33.941	5	34.3471	34.0857	34.0953		34.8359	4	35.1461	35.0859	35.1392		32.5818	5	32.5966	32.4237	32.3347		34.375	4	34.2368	34.2015	34.2943		32.81	5	32.9041	32.8787	32.8125		35.0838	5	34.5662	34.6908	34.7127		33.9154	5	33.9612	33.7846	33.8079		35.0932	5	35.0134	34.7498	34.7563		34.597	5
33.9423	5	34.3429	34.0842	34.0939		34.8501	4	35.1523	35.0934	35.1459		32.5738	5	32.5913	32.4179	32.3296		34.3486	4	34.2461	34.2116	34.303		32.801	5	32.898	32.8746	32.8084		35.0815	5	34.5624	34.6846	34.7078		33.9205	5	33.9592	33.7823	33.8055		35.0858	5	35.0091	34.7453	34.7522		34.5966	5
33.9561	5	34.3387	34.0828	34.0926		34.8336	5	35.1464	35.0877	35.1402		32.5649	5	32.5859	32.412	32.3245		34.31	4	34.2555	34.2215	34.3118		32.792	5	32.892	32.8705	32.8043		35.0735	5	34.5587	34.6783	34.7029		33.9214	5	33.9572	33.78	33.8031		35.07	5	35.0048	34.7409	34.7481		34.5978	5
33.9712	5	34.3346	34.0814	34.0913		34.8171	5	35.1406	35.0821	35.1346		32.5594	6	32.5914	32.4183	32.3303		34.2874	4	34.2648	34.2314	34.3204		32.7828	5	32.886	32.8665	32.8002		35.0719	5	34.5549	34.672	34.6981		33.9241	5	33.9553	33.7777	33.8007		35.0653	5	35.0005	34.7366	34.744		34.6052	5
33.9765	4	34.341	34.09	34.099		34.8053	5	35.1348	35.0765	35.1291		32.5575	6	32.5969	32.4246	32.3361		34.2708	4	34.2741	34.2413	34.3291		32.7771	5	32.8801	32.8625	32.7962		35.0654	5	34.5512	34.6658	34.6933		33.9269	5	33.9533	33.7754	33.7983		35.0571	5	34.9962	34.7322	34.74		34.6127	5
33.9871	4	34.3473	34.0986	34.1066		34.7926	4	35.1411	35.0841	35.1358		32.5616	6	32.6023	32.4308	32.3419		34.2588	4	34.2833	34.2511	34.3377		32.7739	5	32.8742	32.8585	32.7922		35.0529	5	34.5474	34.6596	34.6885		33.9251	5	33.9514	33.7731	33.7959		35.0502	5	34.9919	34.7279	34.736		34.6199	5
34.0134	4	34.3535	34.1071	34.1142		34.7837	4	35.1472	35.0916	35.1424		32.5732	6	32.6077	32.4369	32.3476		34.2568	4	34.2925	34.2608	34.3462		32.773	5	32.8684	32.8546	32.7882		35.0471	5	34.5437	34.6534	34.6837		33.9246	5	33.9495	33.7709	33.7936		35.0462	5	34.9877	34.7236	34.732		34.6253	5
34.0465	4	34.3598	34.1155	34.1217		34.7658	5	35.1414	35.0859	35.1367		32.5947	4	32.6131	32.4431	32.3533		34.2607	4	34.3016	34.2705	34.3548		32.7715	5	32.8625	32.8507	32.7843		35.0403	5	34.54	34.6472	34.679		33.922	5	33.9476	33.7687	33.7912		35.0421	5	34.9834	34.7193	34.728		34.6293	5
34.0765	4	34.366	34.1239	34.1292		34.7444	5	35.1356	35.0803	35.1311		32.5888	4	32.6185	32.4491	32.359		34.2539	4	34.3108	34.2802	34.3632		32.7749	5	32.8568	32.8469	32.7804		35.0354	5	34.5362	34.641	34.6743		33.9244	5	33.9457	33.7665	33.7889		35.0393	5	34.9792	34.7151	34.7241		34.6343	5
34.1126	4	34.3723	34.1323	34.1367		34.7324	5	35.1299	35.0748	35.1256		32.5752	4	32.6239	32.4552	32.3646		34.2451	4	34.3199	34.2898	34.3717		32.7805	5	32.851	32.8431	32.7766		35.0321	5	34.5325	34.6348	34.6696		33.9276	5	33.9438	33.7643	33.7866		35.0425	5	34.9749	34.7108	34.7202		34.6379	5
34.1422	4	34.3785	34.1406	34.1441		34.7319	5	35.1241	35.0693	35.12		32.5649	5	32.6184	32.449	32.359		34.2429	4	34.3289	34.2993	34.3801		32.7733	5	32.8453	32.8393	32.7728		35.028	5	34.5288	34.6287	34.665		33.9331	5	33.942	33.7621	33.7843		35.0433	5	34.9707	34.7067	34.7164		34.6397	5
34.1546	5	34.3741	34.1383	34.1419		34.7275	5	35.1184	35.0638	35.1146		32.5561	5	32.6129	32.4429	32.3534		34.2361	4	34.3379	34.3088	34.3884		32.7632	4	32.8529	32.8476	32.7799		35.021	5	34.5251	34.6225	34.6604		33.933	5	33.9401	33.7599	33.7821		35.0514	5	34.9665	34.7025	34.7125		34.6403	5
34.1437	5	34.3698	34.136	34.1397		34.7256	5	35.1127	35.0584	35.1092		32.5523	5	32.6075	32.4368	32.348		34.2329	4	34.3469	34.3183	34.3967		32.7548	5	32.8472	32.8438	32.776		35.0181	5	34.5214	34.6164	34.6558		33.939	5	33.9383	33.7578	33.7798		35.0558	5	34.9623	34.6983	34.7087		34.6424	5
34.1363	5	34.3655	34.1338	34.1375		34.7267	5	35.1071	35.053	35.1038		32.5417	5	32.6021	32.4308	32.3426		34.2248	4	34.3559	34.3277	34.405		32.7535	5	32.8415	32.8401	32.7722		35.0099	5	34.5177	34.6103	34.6513		33.9496	5	33.9365	33.7556	33.7776		35.0499	5	34.9581	34.6942	34.7049		34.6393	5
34.1262	5	34.3613	34.1316	34.1354		34.7294	5	35.1014	35.0477	35.0986		32.5372	5	32.5967	32.4248	32.3373		34.2234	4	34.3648	34.337	34.4132		32.7498	5	32.8359	32.8363	32.7685		35.0013	5	34.514	34.6042	34.6467		33.9549	5	33.9346	33.7535	33.7754		35.0448	5	34.9539	34.6901	34.7012		34.6316	5
34.1196	5	34.357	34.1294	34.1333		34.7294	5	35.0958	35.0424	35.0933		32.5349	5	32.5914	32.4189	32.332		34.2382	4	34.3737	34.3463	34.4214		32.7481	5	32.8303	32.8327	32.7647		34.9907	5	34.5103	34.5981	34.6423		33.9523	5	33.9328	33.7514	33.7732		35.043	5	34.9498	34.686	34.6974		34.6225	5
34.1141	5	34.3528	34.1273	34.1313		34.7271	5	35.0902	35.0371	35.0882		32.5365	4	32.5968	32.4251	32.3378		34.2415	4	34.3825	34.3556	34.4296		32.7482	5	32.8247	32.829	32.7611		34.9796	5	34.5066	34.592	34.6378		33.9537	5	33.9311	33.7493	33.771		35.0487	5	34.9456	34.682	34.6937		34.6162	5
34.116	5	34.3486	34.1252	34.1293		34.7231	5	35.0846	35.0319	35.0831		32.5267	5	32.5915	32.4192	32.3325		34.2472	4	34.3913	34.3648	34.4377		32.7484	5	32.8191	32.8254	32.7574		34.9701	5	34.5029	34.586	34.6334		33.9555	5	33.9293	33.7472	33.7689		35.0494	5	34.9415	34.6779	34.69		34.6061	5
34.1238	5	34.3444	34.1231	34.1273		34.7216	5	35.0791	35.0268	35.078		32.5107	5	32.5861	32.4133	32.3274		34.2542	5	34.3852	34.3578	34.4312		32.7529	5	32.8136	32.8219	32.7538		34.9644	5	34.4992	34.5799	34.629		33.9595	5	33.9275	33.7451	33.7667		35.0511	5	34.9373	34.6739	34.6864		34.6028	5
34.131	5	34.3403	34.121	34.1253		34.7147	5	35.0736	35.0217	35.073		32.5018	5	32.5809	32.4075	32.3222		34.2757	5	34.379	34.351	34.4249		32.7491	5	32.8082	32.8183	32.7502		34.9539	5	34.4955	34.5739	34.6246		33.9613	5	33.9257	33.7431	33.7646		35.046	5	34.9332	34.6699	34.6827		34.599	5
34.1361	4	34.3466	34.1293	34.1328		34.7029	5	35.0681	35.0166	35.0681		32.499	4	32.5863	32.4138	32.3281		34.2812	5	34.3729	34.3442	34.4186		32.7429	5	32.8027	32.8148	32.7467		34.9522	5	34.4919	34.5678	34.6202		33.9582	5	33.924	33.7411	33.7625		35.0429	5	34.9291	34.666	34.6791		34.6052	5
34.1248	5	34.3424	34.1272	34.1307		34.6944	5	35.0626	35.0115	35.0632		32.4921	5	32.581	32.4079	32.3229		34.2883	5	34.3668	34.3374	34.4123		32.7358	5	32.7973	32.8114	32.7432		34.9474	5	34.4882	34.5618	34.6159		33.9541	5	33.9223	33.739	33.7604		35.0351	5	34.925	34.662	34.6755		34.6104	5
34.1172	5	34.3383	34.125	34.1287		34.6937	5	35.0571	35.0065	35.0583		32.4895	5	32.5758	32.4021	32.3179		34.2967	5	34.3608	34.3307	34.4062		32.7325	5	32.792	32.8079	32.7397		34.9427	5	34.4845	34.5558	34.6116		33.9522	5	33.9205	33.737	33.7583		35.0368	5	34.9209	34.6581	34.672		34.6151	5
34.1262	5	34.3342	34.1229	34.1267		34.695	5	35.0517	35.0016	35.0535		32.4819	5	32.5705	32.3963	32.3129		34.3016	5	34.3548	34.3241	34.4001		32.7304	5	32.7866	32.8045	32.7362		34.9418	5	34.4809	34.5498	34.6074		33.9552	5	33.9188	33.735	33.7563		35.0343	5	34.9168	34.6542	34.6684		34.6213	5
34.1239	5	34.3301	34.1208	34.1247		34.6933	5	35.0463	34.9967	35.0487		32.4774	5	32.5653	32.3906	32.308		34.3151	5	34.3489	34.3175	34.3941		32.7326	5	32.7813	32.8012	32.7328		34.9379	5	34.4772	34.5439	34.6031		33.962	5	33.9171	33.733	33.7542		35.035	5	34.9128	34.6503	34.6649		34.6272	5
34.1277	5	34.326	34.1187	34.1228		34.6929	5	35.0409	34.9918	35.044		32.4759	5	32.5601	32.3849	32.3031		34.3226	5	34.343	34.311	34.3881		32.7327	5	32.7761	32.7979	32.7294		34.9295	5	34.4736	34.5379	34.5989		33.9622	5	33.9155	33.7311	33.7522		35.0328	5	34.9087	34.6465	34.6614		34.6342	5
34.138	5	34.322	34.1167	34.1209		34.6937	4	35.0474	34.9999	35.051		32.4785	5	32.5549	32.3793	32.2983		34.3334	5	34.3371	34.3045	34.3822		32.7287	5	32.7708	32.7946	32.7261		34.92	5	34.47	34.532	34.5947		33.9614	5	33.9138	33.7291	33.7502		35.0349	5	34.9047	34.6426	34.6579		34.6462	5
34.1446	5	34.3179	34.1147	34.119		34.6984	4	35.0539	35.0078	35.058		32.4761	5	32.5498	32.3737	32.2936		34.3297	5	34.3313	34.2981	34.3763		32.7274	5	32.7656	32.7913	32.7228		34.9098	4	34.477	34.5491	34.608		33.965	5	33.9121	33.7272	33.7482		35.0364	4	34.9102	34.6518	34.6666		34.6636	6
34.1406	5	34.3139	34.1127	34.1171		34.68	5	35.0485	35.0029	35.0532		32.4714	5	32.5447	32.3682	32.289		34.3304	5	34.3256	34.2917	34.3705		32.7284	5	32.7605	32.7881	32.7195		34.8991	4	34.4841	34.5659	34.6211		33.9684	5	33.9105	33.7253	33.7462		35.0168	5	34.9061	34.648	34.6631		34.6905	6
34.1356	5	34.31	34.1107	34.1153		34.6615	5	35.0431	34.998	35.0483		32.4662	5	32.5396	32.3627	32.2844		34.3356	5	34.3198	34.2854	34.3648		32.7296	5	32.7553	32.7849	32.7163		34.8862	5	34.4804	34.5599	34.6168		33.9611	5	33.9088	33.7233	33.7442		35.009	5	34.9021	34.6441	34.6596		34.7247	6
34.1283	5	34.306	34.1087	34.1134		34.6534	5	35.0377	34.9931	35.0436		32.4607	5	32.5345	32.3572	32.2799		34.3403	4	34.3289	34.295	34.3733		32.7269	5	32.7502	32.7818	32.7131		34.8832	5	34.4768	34.5539	34.6125		33.9586	5	33.9072	33.7214	33.7422		35.0031	5	34.898	34.6403	34.6561		34.7633	6
34.1221	5	34.302	34.1068	34.1117		34.6553	5	35.0324	34.9882	35.0389		32.4514	5	32.5295	32.3518	32.2754		34.3301	5	34.3231	34.2886	34.3675		32.7202	5	32.7452	32.7786	32.7099		34.8794	5	34.4731	34.5479	34.6082		33.9582	5	33.9056	33.7196	33.7403		35.0022	5	34.894	34.6366	34.6527		34.8013	6
34.1144	5	34.2981	34.1049	34.1099		34.6595	5	35.027	34.9834	35.0343		32.4453	5	32.5244	32.3465	32.271		34.3374	5	34.3174	34.2823	34.3618		32.7136	5	32.7401	32.7755	32.7067		34.8808	4	34.4802	34.5648	34.6213		33.9593	5	33.9039	33.7177	33.7383		35.0012	5	34.89	34.6328	34.6492		34.839	6
34.1182	5	34.2942	34.103	34.1081		34.6575	5	35.0217	34.9787	35.0297		32.4367	5	32.5194	32.3411	32.2666		34.346	5	34.3117	34.2761	34.3562		32.7093	6	32.7481	32.7842	32.7141		34.8799	4	34.4872	34.5814	34.6343		33.9614	5	33.9023	33.7158	33.7364		35.0001	5	34.886	34.6291	34.6458		34.874	6
34.111	5	34.2903	34.1011	34.1064		34.6518	5	35.0165	34.9739	35.0251		32.4356	5	32.5145	32.3359	32.2623		34.3401	5	34.3061	34.2699	34.3506		32.7062	6	32.7561	32.7928	32.7215		34.8736	5	34.4836	34.5754	34.6299		33.9629	5	33.9008	33.714	33.7345		34.9979	5	34.882	34.6253	34.6424		34.9039	6
34.1037	5	34.2865	34.0993	34.1047		34.6561	5	35.0112	34.9692	35.0206		32.4312	5	32.5095	32.3306	32.2581		34.344	4	34.3152	34.2796	34.3591		32.7036	6	32.7641	32.8013	32.7289		34.8731	5	34.4799	34.5693	34.6255		33.9661	5	33.8992	33.7121	33.7326		34.9907	5	34.878	34.6217	34.639		34.9358	6
34.107	4	34.293	34.1077	34.1122		34.6592	5	35.006	34.9646	35.0162		32.4228	4	32.5152	32.3374	32.2642		34.3429	5	34.3095	34.2734	34.3535		32.7052	6	32.772	32.8098	32.7362		34.879	5	34.4763	34.5633	34.6211		33.9569	5	33.8976	33.7103	33.7307		34.9851	5	34.8741	34.618	34.6357		34.9597	6
34.1127	5	34.2891	34.1057	34.1104		34.663	5	35.0007	34.96	35.0118		32.4108	5	32.5103	32.3321	32.26		34.3371	5	34.3039	34.2672	34.348		32.7057	6	32.7798	32.8183	32.7435		34.8877	5	34.4727	34.5573	34.6168		33.9527	5	33.896	33.7085	33.7288		34.9832	5	34.8701	34.6143	34.6323		34.9848	6
34.1075	5	34.2853	34.1038	34.1086		34.6694	5	34.9956	34.9554	35.0074		32.401	5	32.5054	32.3269	32.2558		34.3282	5	34.2983	34.2611	34.3425		32.7168	6	32.7877	32.8267	32.7507		34.8957	5	34.469	34.5513	34.6124		33.9574	5	33.8945	33.7067	33.7269		34.9815	5	34.8662	34.6107	34.629		35.0141	6
34.1092	5	34.2814	34.1019	34.1069		34.6703	5	34.9904	34.9509	35.0031		32.3894	5	32.5005	32.3217	32.2516		34.3339	5	34.2928	34.2551	34.3371		32.7276	6	32.7955	32.8351	32.7579		34.8954	5	34.4654	34.5453	34.6082		33.958	5	33.893	33.7049	33.7251		34.987	5	34.8622	34.6071	34.6257		35.0297	6
34.1188	5	34.2776	34.1	34.1051		34.6655	5	34.9852	34.9464	34.9989		32.3814	5	32.4956	32.3166	32.2475		34.335	4	34.3019	34.2648	34.3457		32.7526	6	32.8033	32.8434	32.7651		34.8903	5	34.4618	34.5393	34.6039		33.9658	5	33.8914	33.7031	33.7232		34.9933	5	34.8583	34.6035	34.6224		35.0485	6
34.1265	5	34.2738	34.0981	34.1034		34.6609	5	34.9801	34.942	34.9947		32.3792	5	32.4907	32.3115	32.2435		34.3426	5	34.2963	34.2587	34.3402		32.7904	6	32.8111	32.8517	32.7722		34.8873	5	34.4581	34.5334	34.5996		33.9756	5	33.8899	33.7014	33.7214		34.9939	5	34.8544	34.6	34.6192		35.0617	6
34.1325	5	34.2701	34.0963	34.1017		34.6605	5	34.975	34.9375	34.9905		32.3823	5	32.4859	32.3065	32.2395		34.3388	5	34.2908	34.2527	34.3348		32.8274	6	32.8188	32.86	32.7793		34.8881	5	34.4545	34.5274	34.5954		33.9797	5	33.8884	33.6997	33.7196		34.9843	5	34.8505	34.5964	34.6159		35.0664	6
34.136	5	34.2663	34.0944	34.1		34.6581	5	34.9699	34.9332	34.9864		32.382	5	32.4811	32.3014	32.2355		34.3441	5	34.2853	34.2467	34.3294		32.8624	6	32.8265	32.8682	32.7864		34.8877	5	34.4509	34.5215	34.5912		33.9801	5	33.8869	33.6979	33.7177		34.9718	5	34.8466	34.5929	34.6127		35.0562	6
34.1318	5	34.2626	34.0926	34.0983		34.658	5	34.9649	34.9288	34.9824		32.3805	5	32.4763	32.2964	32.2316		34.346	5	34.2799	34.2408	34.3241		32.8957	4	32.8342	32.8763	32.7934		34.8839	5	34.4473	34.5155	34.5871		33.9842	5	33.8854	33.6962	33.7159		34.9673	5	34.8427	34.5894	34.6095		35.0307	4
34.1222	5	34.2589	34.0909	34.0967		34.6566	5	34.9598	34.9245	34.9783		32.3831	5	32.4715	32.2915	32.2278		34.3444	5	34.2744	34.2349	34.3188		32.9041	4	32.8419	32.8844	32.8004		34.8709	5	34.4437	34.5096	34.5829		33.983	5	33.8839	33.6945	33.7141		34.9717	5	34.8388	34.586	34.6064		34.9948	4
34.1184	5	34.2552	34.0891	34.0951		34.655	5	34.9548	34.9202	34.9744		32.383	5	32.4668	32.2866	32.224		34.3626	5	34.2691	34.2291	34.3136		32.8886	4	32.8495	32.8925	32.8074		34.8592	5	34.4401	34.5037	34.5788		33.9827	5	33.8825	33.6929	33.7124		34.9735	5	34.8349	34.5825	34.6032		34.9555	4
34.1138	5	34.2515	34.0874	34.0935		34.6503	5	34.9498	34.916	34.9705		32.3772	5	32.4621	32.2817	32.2203		34.3623	5	34.2637	34.2233	34.3084		32.8709	4	32.8571	32.9005	32.8143		34.8494	5	34.4365	34.4978	34.5747		33.98	5	33.881	33.6912	33.7106		34.9749	5	34.831	34.5791	34.6001		34.9138	4
34.1132	5	34.2479	34.0857	34.092		34.642	5	34.9448	34.9117	34.9666		32.369	4	32.4679	32.2888	32.2266		34.3637	4	34.273	34.2332	34.3172		32.8521	4	32.8646	32.9085	32.8212		34.8489	5	34.4329	34.4919	34.5706		33.9772	5	33.8796	33.6896	33.7088		34.9789	5	34.8272	34.5757	34.5969		34.8825	5
34.1119	5	34.2442	34.084	34.0904		34.6381	5	34.9399	34.9076	34.9628		32.3573	5	32.4632	32.2839	32.2228		34.3584	5	34.2676	34.2274	34.312		32.8328	4	32.8722	32.9165	32.8281		34.8478	5	34.4293	34.4861	34.5666		33.9766	5	33.8781	33.6879	33.7071		34.987	6	34.833	34.5854	34.606		34.8553	4
34.1095	5	34.2406	34.0823	34.0889		34.641	5	34.9349	34.9034	34.959		32.3416	5	32.4585	32.279	32.2191		34.3449	5	34.2623	34.2216	34.3068		32.82	4	32.8797	32.9244	32.8349		34.8439	5	34.4258	34.4802	34.5626		33.9716	5	33.8767	33.6863	33.7054		34.991	6	34.8387	34.595	34.615		34.8387	4
34.1062	5	34.237	34.0807	34.0874		34.6439	5	34.93	34.8993	34.9553		32.3334	5	32.4538	32.2742	32.2155		34.3598	5	34.257	34.2159	34.3017		32.8065	4	32.8872	32.9323	32.8417		34.8329	5	34.4222	34.4744	34.5586		33.9686	5	33.8753	33.6847	33.7036		34.9975	6	34.8444	34.6046	34.624		34.8184	5
34.1067	5	34.2335	34.0791	34.0859		34.6474	5	34.9251	34.8952	34.9516		32.3302	5	32.4492	32.2694	32.2118		34.3637	5	34.2517	34.2103	34.2967		32.7966	4	32.8946	32.9401	32.8484		34.8278	5	34.4186	34.4685	34.5546		33.9638	5	33.8739	33.6831	33.7019		35.0083	4	34.8501	34.6141	34.6329		34.8002	4
34.0956	5	34.2299	34.0775	34.0845		34.6359	5	34.9202	34.8911	34.9479		32.3277	5	32.4446	32.2647	32.2083		34.3619	5	34.2465	34.2046	34.2917		32.7854	5	32.8886	32.9355	32.8439		34.8264	5	34.415	34.4627	34.5506		33.9711	4	33.8841	33.6954	33.7145		34.9989	5	34.8462	34.6105	34.6295		34.7896	5
34.0758	5	34.2264	34.0759	34.083		34.6216	5	34.9154	34.8871	34.9443		32.3279	5	32.4399	32.26	32.2048		34.3537	5	34.2413	34.1991	34.2868		32.7796	5	32.8827	32.931	32.8394		34.8282	5	34.4115	34.4569	34.5467		33.9776	4	33.8943	33.7076	33.727		34.9867	5	34.8423	34.6069	34.6262		34.7763	5
34.0637	5	34.2229	34.0744	34.0816		34.613	5	34.9106	34.8831	34.9408		32.3318	5	32.4354	32.2554	32.2013		34.368	5	34.2361	34.1936	34.2819		32.7766	5	32.8768	32.9265	32.835		34.8322	5	34.4079	34.4511	34.5428		33.9697	5	33.8927	33.7059	33.7251		34.9775	4	34.848	34.6164	34.635		34.7715	5
34.0596	5	34.2194	34.0728	34.0803		34.6085	5	34.9058	34.8791	34.9373		32.3358	5	32.4308	32.2507	32.1978		34.3628	5	34.231	34.1881	34.277		32.7771	5	32.8709	32.9221	32.8305		34.8368	5	34.4044	34.4453	34.5389		33.9584	5	33.8912	33.7041	33.7232		34.9604	4	34.8537	34.6258	34.6438		34.7705	5
34.0576	5	34.2159	34.0713	34.0789		34.6115	5	34.901	34.8752	34.9338		32.34	5	32.4262	32.2462	32.1944		34.3592	5	34.2259	34.1827	34.2722		32.776	5	32.8651	32.9177	32.8262		34.8372	6	34.4117	34.4633	34.5526		33.9493	5	33.8897	33.7024	33.7213		34.9631	4	34.8594	34.6351	34.6526		34.7734	5
34.0504	5	34.2124	34.0698	34.0776		34.6195	5	34.8962	34.8712	34.9304		32.3454	5	32.4217	32.2416	32.1911		34.343	5	34.2209	34.1773	34.2675		32.7749	5	32.8593	32.9134	32.8219		34.8374	6	34.4189	34.4811	34.5663		33.9438	5	33.8882	33.7007	33.7194		34.9696	4	34.8651	34.6444	34.6613		34.7816	5
34.0453	5	34.209	34.0684	34.0763		34.6312	5	34.8914	34.8674	34.927		32.3405	5	32.4172	32.2371	32.1878		34.3285	5	34.2159	34.1719	34.2628		32.7739	5	32.8535	32.9091	32.8176		34.8408	6	34.4261	34.4987	34.5797		33.9408	5	33.8867	33.699	33.7175		34.9683	4	34.8707	34.6536	34.6699		34.7715	5
34.0444	5	34.2056	34.0669	34.075		34.6396	5	34.8867	34.8635	34.9236		32.3334	5	32.4127	32.2327	32.1846		34.3165	5	34.2109	34.1666	34.2581		32.7757	5	32.8478	32.9049	32.8133		34.8446	6	34.4333	34.516	34.5931		33.9315	5	33.8852	33.6973	33.7157		34.9656	4	34.8763	34.6628	34.6784		34.759	5
34.0475	5	34.2022	34.0655	34.0737		34.6449	5	34.882	34.8597	34.9203		32.3272	5	32.4083	32.2282	32.1814		34.3155	5	34.206	34.1614	34.2535		32.7768	5	32.8421	32.9007	32.8091		34.8416	6	34.4405	34.533	34.6063		33.9234	5	33.8837	33.6956	33.7138		34.9653	4	34.882	34.6719	34.6869		34.7548	5
34.0512	5	34.1988	34.0641	34.0725		34.6492	5	34.8773	34.8559	34.9171		32.3252	5	32.4039	32.2239	32.1782		34.2977	5	34.201	34.1562	34.2489		32.7704	5	32.8365	32.8965	32.805		34.8391	6	34.4477	34.5498	34.6193		33.9183	5	33.8823	33.6939	33.712		34.9652	4	34.8876	34.6809	34.6953		34.7519	5
34.0503	5	34.1954	34.0627	34.0713		34.6589	5	34.8726	34.8522	34.9138		32.322	5	32.3994	32.2195	32.175		34.2969	4	34.2106	34.1664	34.2579		32.7622	5	32.8308	32.8924	32.8009		34.8221	6	34.4548	34.5664	34.6323		33.9153	5	33.8808	33.6923	33.7102		34.9682	4	34.8931	34.6899	34.7037		34.7493	5
34.0494	5	34.1921	34.0614	34.0702		34.672	5	34.868	34.8484	34.9107		32.3238	5	32.3951	32.2152	32.1719		34.2936	5	34.2056	34.1611	34.2533		32.7604	5	32.8253	32.8883	32.7968		34.8027	4	34.462	34.5827	34.645		33.9153	5	33.8794	33.6906	33.7084		34.9763	4	34.8987	34.6987	34.712		34.7552	5
34.0461	5	34.1888	34.06	34.069		34.6887	6	34.875	34.8573	34.9184		32.3216	5	32.3907	32.2109	32.1689		34.2865	5	34.2007	34.1559	34.2488		32.7572	5	32.8197	32.8843	32.7928		34.7954	4	34.4691	34.5988	34.6577		33.9139	5	33.8779	33.689	33.7066		34.9829	4	34.9042	34.7076	34.7202		34.7504	5
34.0407	5	34.1854	34.0587	34.0679		34.7096	6	34.882	34.866	34.926		32.3127	4	32.3968	32.2185	32.1754		34.2795	5	34.1958	34.1508	34.2442		32.7548	5	32.8142	32.8803	32.7888		34.7851	5	34.4654	34.5926	34.653		33.9099	5	33.8765	33.6873	33.7048		34.9904	4	34.9098	34.7164	34.7284		34.7417	5
34.0383	5	34.1822	34.0574	34.0668		34.7499	4	34.889	34.8748	34.9337		32.2973	4	32.4029	32.226	32.1819		34.2742	5	34.191	34.1456	34.2398		32.7558	5	32.8087	32.8763	32.7848		34.7861	5	34.4618	34.5865	34.6484		33.906	5	33.8751	33.6857	33.7031		35.004	4	34.9153	34.7251	34.7366		34.7332	5
34.0411	4	34.189	34.0661	34.0746		34.775	4	34.896	34.8834	34.9413		32.2866	4	32.409	32.2334	32.1884		34.2783	5	34.1862	34.1406	34.2354		32.7638	5	32.8033	32.8724	32.7809		34.7838	5	34.4582	34.5804	34.6438		33.9025	5	33.8737	33.6841	33.7013		35.0154	4	34.9208	34.7337	34.7446		34.7245	5
34.0488	4	34.1958	34.0747	34.0823		34.7546	5	34.8913	34.8794	34.9378		32.275	4	32.4151	32.2408	32.1949		34.282	5	34.1814	34.1355	34.231		32.7686	5	32.7979	32.8685	32.777		34.7754	5	34.4546	34.5743	34.6393		33.8868	5	33.8723	33.6825	33.6995		35.0227	4	34.9263	34.7423	34.7526		34.7242	5
34.0567	5	34.1925	34.0731	34.0809		34.7355	5	34.8865	34.8754	34.9344		32.2692	5	32.4106	32.2362	32.1914		34.282	5	34.1767	34.1305	34.2266		32.7725	5	32.7925	32.8647	32.7732		34.7686	5	34.4509	34.5682	34.6348		33.8721	5	33.8709	33.681	33.6978		35.0333	4	34.9317	34.7508	34.7606		34.716	5
34.0592	5	34.1891	34.0716	34.0797		34.7278	5	34.8818	34.8714	34.931		32.2703	5	32.4062	32.2318	32.1881		34.2892	5	34.172	34.1256	34.2223		32.7731	5	32.7872	32.8609	32.7694		34.7733	5	34.4473	34.5622	34.6303		33.8601	5	33.8695	33.6794	33.6961		35.0378	4	34.9372	34.7593	34.7685		34.7028	4
34.0721	5	34.1858	34.0701	34.0784		34.7209	5	34.8771	34.8675	34.9276		32.2749	5	32.4018	32.2273	32.1847		34.2871	5	34.1673	34.1206	34.218		32.7738	5	32.7819	32.8572	32.7656		34.7746	5	34.4437	34.5561	34.6258		33.8483	5	33.8681	33.6778	33.6944		35.0364	4	34.9426	34.7677	34.7763		34.6927	5
34.0817	5	34.1825	34.0686	34.0772		34.7202	5	34.8725	34.8636	34.9243		32.2804	5	32.3974	32.2229	32.1814		34.286	5	34.1627	34.1158	34.2138		32.7758	5	32.7766	32.8534	32.7619		34.7752	5	34.4401	34.5501	34.6214		33.8391	5	33.8667	33.6763	33.6927		35.0273	4	34.948	34.776	34.7841		34.6771	5
34.0871	5	34.1792	34.0672	34.076		34.7233	5	34.8678	34.8597	34.921		32.282	5	32.393	32.2185	32.1782		34.2778	5	34.158	34.1109	34.2096		32.7728	5	32.7714	32.8497	32.7582		34.767	5	34.4365	34.544	34.6169		33.8327	5	33.8654	33.6747	33.691		35.0254	4	34.9534	34.7843	34.7918		34.6763	5
34.0923	5	34.176	34.0658	34.0748		34.723	5	34.8632	34.8559	34.9178		32.2826	5	32.3886	32.2142	32.175		34.2602	5	34.1535	34.1061	34.2054		32.7616	4	32.7793	32.8581	32.7654		34.7606	5	34.433	34.538	34.6126		33.8281	5	33.864	33.6732	33.6893		35.0192	4	34.9588	34.7925	34.7995		34.6781	5
34.0961	5	34.1727	34.0644	34.0736		34.7251	5	34.8586	34.8521	34.9146		32.2825	5	32.3843	32.2098	32.1718		34.2335	5	34.1489	34.1014	34.2012		32.751	5	32.774	32.8543	32.7616		34.7569	5	34.4294	34.532	34.6082		33.8181	5	33.8627	33.6717	33.6877		35.0194	4	34.9642	34.8007	34.8071		34.6802	5
34.0969	5	34.1695	34.063	34.0725		34.7235	5	34.854	34.8483	34.9115		32.2794	5	32.38	32.2056	32.1686		34.2299	5	34.1444	34.0966	34.1971		32.7432	5	32.7688	32.8507	32.758		34.7548	5	34.4258	34.526	34.6039		33.814	5	33.8614	33.6702	33.686		35.0273	4	34.9695	34.8088	34.8147		34.6879	5
34.0987	5	34.1663	34.0617	34.0714		34.7288	5	34.8494	34.8446	34.9084		32.2769	5	32.3757	32.2013	32.1655		34.2279	6	34.1541	34.1072	34.2063		32.7428	5	32.7636	32.847	32.7543		34.7518	4	34.433	34.5428	34.6169		33.8136	5	33.86	33.6687	33.6844		35.0331	4	34.9748	34.8169	34.8222		34.691	5
34.1004	5	34.1631	34.0604	34.0703		34.7367	5	34.8449	34.8409	34.9053		32.2738	5	32.3714	32.1971	32.1625		34.2314	6	34.1638	34.1176	34.2155		32.742	5	32.7585	32.8434	32.7507		34.7447	5	34.4294	34.5368	34.6125		33.8081	5	33.8587	33.6672	33.6828		35.0459	4	34.9802	34.8249	34.8296		34.6885	5
34.1013	5	34.16	34.0591	34.0692		34.7458	6	34.852	34.8497	34.913		32.2683	5	32.3671	32.1929	32.1594		34.2375	6	34.1735	34.128	34.2247		32.7426	5	32.7533	32.8399	32.7471		34.7351	4	34.4366	34.5534	34.6255		33.8052	5	33.8574	33.6657	33.6812		35.0557	4	34.9855	34.8328	34.837		34.691	5
34.0935	5	34.1568	34.0578	34.0682		34.7564	6	34.8591	34.8585	34.9208		32.2706	5	32.3629	32.1887	32.1565		34.2346	6	34.1831	34.1384	34.2338		32.751	5	32.7482	32.8363	32.7436		34.74	4	34.4438	34.5698	34.6384		33.8086	5	33.8561	33.6642	33.6796		35.0507	4	34.9907	34.8407	34.8444		34.689	5
34.0931	5	34.1537	34.0566	34.0671		34.768	6	34.8661	34.8672	34.9284		32.2707	4	32.3691	32.1963	32.163		34.251	4	34.1927	34.1487	34.2428		32.7478	5	32.7432	32.8328	32.74		34.7359	4	34.4509	34.5859	34.6511		33.8051	5	33.8549	33.6627	33.678		35.0465	4	34.996	34.8485	34.8516		34.6789	5
34.0888	5	34.1505	34.0554	34.0661		34.7851	6	34.8732	34.8759	34.9361		32.2565	5	32.3649	32.1921	32.16		34.2444	4	34.2022	34.1589	34.2518		32.7433	5	32.7382	32.8294	32.7366		34.725	5	34.4473	34.5798	34.6465		33.8013	5	33.8536	33.6613	33.6764		35.0398	4	35.0013	34.8563	34.8589		34.6634	5
34.0907	5	34.1474	34.0542	34.0651		34.8121	6	34.8802	34.8845	34.9437		32.2416	5	32.3607	32.1879	32.157		34.2341	4	34.2117	34.1691	34.2607		32.7428	5	32.7332	32.826	32.7331		34.7212	5	34.4437	34.5737	34.6419		33.7994	5	33.8523	33.6598	33.6749		35.0312	5	34.997	34.8513	34.8538		34.6553	5
34.0934	5	34.1443	34.053	34.0642		34.8587	6	34.8872	34.893	34.9512		32.2326	5	32.3565	32.1838	32.154		34.2193	5	34.2068	34.1639	34.2559		32.7407	5	32.7282	32.8226	32.7297		34.7158	5	34.4401	34.5676	34.6373		33.7989	6	33.8626	33.6722	33.6876		35.0192	5	34.9927	34.8464	34.8488		34.6519	5
34.0902	5	34.1413	34.0518	34.0632		34.91	6	34.8942	34.9015	34.9587		32.2252	5	32.3523	32.1797	32.151		34.2258	5	34.2019	34.1586	34.2512		32.7377	5	32.7233	32.8192	32.7263		34.7172	5	34.4365	34.5616	34.6328		33.8071	6	33.8729	33.6846	33.7002		35.0091	5	34.9884	34.8415	34.8438		34.6527	5
34.09	5	34.1382	34.0506	34.0623		34.9693	6	34.9011	34.91	34.9662		32.2217	5	32.3481	32.1756	32.1481		34.2319	5	34.197	34.1534	34.2465		32.7383	5	32.7184	32.8159	32.723		34.7197	5	34.433	34.5555	34.6283		33.82	6	33.8831	33.6968	33.7127		35.0082	4	34.9937	34.8493	34.8511		34.6527	5
34.0975	4	34.1452	34.0593	34.0701		35.027	6	34.9081	34.9184	34.9737		32.2203	5	32.344	32.1715	32.1453		34.2473	5	34.1921	34.1483	34.2418		32.7448	5	32.7135	32.8126	32.7197		34.7204	5	34.4294	34.5494	34.6239		33.8339	6	33.8933	33.709	33.7252		35.0065	5	34.9895	34.8444	34.8461		34.6573	5
34.1145	4	34.1522	34.068	34.0778		35.0796	6	34.915	34.9267	34.9811		32.2181	5	32.3398	32.1675	32.1425		34.2616	5	34.1873	34.1432	34.2371		32.7502	5	32.7087	32.8094	32.7164		34.7224	5	34.4258	34.5434	34.6194		33.8563	6	33.9035	33.7211	33.7375		35.0006	5	34.9852	34.8395	34.8411		34.6499	5
34.1429	4	34.1591	34.0766	34.0855		35.1072	4	34.9219	34.935	34.9884		32.2177	5	32.3357	32.1635	32.1397		34.2768	4	34.1969	34.1534	34.2461		32.7534	5	32.7039	32.8062	32.7131		34.7264	5	34.4222	34.5374	34.615		33.8798	6	33.9136	33.7331	33.7498		35.0092	5	34.981	34.8347	34.8362		34.6363	5
34.1501	5	34.156	34.075	34.0842		35.0841	4	34.9288	34.9432	34.9957		32.2196	5	32.3317	32.1595	32.1369		34.2893	4	34.2064	34.1637	34.2551		32.7541	4	32.712	32.8147	32.7205		34.7229	5	34.4187	34.5314	34.6106		33.9161	6	33.9237	33.745	33.762		35.0247	5	34.9767	34.8298	34.8313		34.6316	5
34.1353	5	34.1528	34.0735	34.0829		35.053	4	34.9356	34.9514	35.003		32.2245	5	32.3276	32.1556	32.1342		34.2855	4	34.2159	34.1738	34.2639		32.7468	5	32.7072	32.8115	32.7172		34.7201	5	34.4151	34.5254	34.6063		33.9461	6	33.9337	33.7569	33.7741		35.0353	5	34.9725	34.825	34.8265		34.6223	5
34.1291	5	34.1497	34.072	34.0817		35.015	4	34.9424	34.9596	35.0103		32.2256	5	32.3236	32.1517	32.1315		34.2832	5	34.2109	34.1685	34.2591		32.7434	5	32.7024	32.8083	32.714		34.7172	5	34.4115	34.5194	34.602		33.9768	6	33.9437	33.7686	33.7861		35.0309	5	34.9683	34.8203	34.8217		34.6208	5
34.1199	5	34.1466	34.0706	34.0805		34.9774	5	34.9375	34.9548	35.006		32.2255	5	32.3195	32.1478	32.1289		34.2881	5	34.206	34.1632	34.2542		32.7373	5	32.6977	32.8051	32.7107		34.7129	5	34.408	34.5134	34.5977		34.0017	6	33.9537	33.7803	33.798		35.0379	4	34.9736	34.8283	34.8291		34.6275	5
34.106	5	34.1435	34.0691	34.0792		34.949	5	34.9326	34.9501	35.0018		32.226	5	32.3155	32.144	32.1263		34.3134	5	34.2011	34.158	34.2494		32.7289	5	32.6929	32.8019	32.7076		34.7017	5	34.4044	34.5074	34.5934		34.0185	6	33.9636	33.792	33.8099		35.0386	4	34.9789	34.8362	34.8365		34.6285	5
34.0997	4	34.1505	34.0777	34.0869		34.9304	5	34.9277	34.9454	34.9976		32.2238	5	32.3115	32.1402	32.1237		34.3301	5	34.1962	34.1528	34.2446		32.7255	5	32.6882	32.7988	32.7044		34.6878	5	34.4009	34.5015	34.5892		34.031	6	33.9735	33.8035	33.8217		35.0309	5	34.9747	34.8314	34.8316		34.6303	5
34.093	5	34.1474	34.0762	34.0856		34.9167	5	34.9228	34.9407	34.9935		32.2278	5	32.3076	32.1364	32.1211		34.3427	5	34.1914	34.1476	34.2399		32.7274	5	32.6835	32.7957	32.7013		34.6778	5	34.3973	34.4956	34.5849		34.0483	6	33.9833	33.815	33.8334		35.0192	5	34.9705	34.8266	34.8268		34.6257	4
34.0955	5	34.1443	34.0747	34.0843		34.9033	5	34.9179	34.9361	34.9894		32.2343	6	32.314	32.1443	32.1278		34.3494	5	34.1865	34.1425	34.2352		32.7282	5	32.6789	32.7926	32.6982		34.6758	5	34.3938	34.4896	34.5808		34.0504	6	33.9931	33.8264	33.845		35.0083	5	34.9663	34.8218	34.822		34.6086	5
34.1103	5	34.1412	34.0731	34.083		34.8973	5	34.9131	34.9315	34.9853		32.2399	6	32.3204	32.1522	32.1345		34.3652	5	34.1818	34.1375	34.2306		32.7319	5	32.6743	32.7896	32.6951		34.6775	5	34.3903	34.4837	34.5766		34.0456	6	34.0029	33.8377	33.8565		35.007	4	34.9716	34.8298	34.8294		34.596	5
34.1128	5	34.1382	34.0717	34.0817		34.8989	5	34.9083	34.9269	34.9813		32.2484	6	32.3268	32.1601	32.1412		34.3721	5	34.177	34.1325	34.226		32.7393	5	32.6697	32.7866	32.6921		34.6697	5	34.3868	34.4778	34.5725		34.0451	6	34.0126	33.849	33.868		34.9979	4	34.977	34.8377	34.8368		34.5946	5
34.1099	5	34.1351	34.0702	34.0805		34.8996	5	34.9035	34.9224	34.9774		32.2738	6	32.3331	32.1679	32.1478		34.3761	5	34.1723	34.1275	34.2215		32.741	5	32.6652	32.7836	32.689		34.6672	5	34.3832	34.4719	34.5684		34.0544	6	34.0223	33.8602	33.8794		34.9882	5	34.9727	34.8329	34.8319		34.5896	5
34.1162	5	34.1321	34.0688	34.0792		34.8949	5	34.8987	34.9179	34.9735		32.2942	6	32.3394	32.1756	32.1544		34.3866	5	34.1676	34.1226	34.217		32.7445	5	32.6606	32.7807	32.6861		34.6705	5	34.3797	34.4661	34.5643		34.0643	6	34.032	33.8713	33.8907		34.991	5	34.9685	34.8281	34.8271		34.593	5
34.1154	5	34.1291	34.0674	34.078		34.892	5	34.8939	34.9135	34.9696		32.3285	6	32.3457	32.1833	32.1609		34.3752	4	34.1773	34.1329	34.2261		32.7502	6	32.6689	32.7894	32.6936		34.6763	5	34.3762	34.4602	34.5603		34.0679	6	34.0416	33.8823	33.9019		34.9998	5	34.9643	34.8233	34.8223		34.5957	5
34.1151	5	34.1261	34.066	34.0768		34.8955	5	34.8892	34.909	34.9658		32.3881	6	32.352	32.1909	32.1674		34.3652	5	34.1726	34.128	34.2215		32.7622	6	32.6772	32.798	32.701		34.6774	5	34.3727	34.4544	34.5563		34.0651	6	34.0512	33.8933	33.9131		35.0013	4	34.9697	34.8313	34.8297		34.5981	5
34.116	5	34.1232	34.0647	34.0756		34.9009	5	34.8844	34.9046	34.962		32.4154	6	32.3583	32.1985	32.1739		34.3586	5	34.1679	34.123	34.217		32.7821	6	32.6854	32.8067	32.7085		34.6815	5	34.3692	34.4485	34.5523		34.0658	4	34.0607	33.9042	33.9241		34.9976	4	34.975	34.8393	34.8371		34.5998	4
34.1189	5	34.1202	34.0634	34.0744		34.9033	5	34.8797	34.9003	34.9582		32.4671	6	32.3645	32.2061	32.1804		34.3549	5	34.1632	34.1181	34.2126		32.8075	6	32.6936	32.8153	32.7158		34.6928	5	34.3657	34.4427	34.5484		34.0683	4	34.0702	33.915	33.9351		34.9955	5	34.9708	34.8344	34.8322		34.5933	5
34.1244	5	34.1173	34.0621	34.0733		34.9055	5	34.8751	34.896	34.9545		32.5118	6	32.3708	32.2135	32.1868		34.351	5	34.1586	34.1133	34.2082		32.8353	6	32.7018	32.8238	32.7232		34.7012	5	34.3622	34.4369	34.5445		34.033	4	34.0797	33.9258	33.9461		34.9825	4	34.9761	34.8423	34.8396		34.582	5
34.0973	5	34.1143	34.0609	34.0721		34.911	5	34.8704	34.8917	34.9509		32.5468	6	32.377	32.221	32.1931		34.3511	5	34.154	34.1085	34.2038		32.8719	6	32.7099	32.8323	32.7305		34.6978	5	34.3587	34.4311	34.5406		33.9977	5	34.0769	33.9223	33.9423		34.9757	5	34.9719	34.8375	34.8347		34.5824	5
34.0953	5	34.1114	34.0596	34.071		34.9194	5	34.8658	34.8874	34.9472		32.5572	6	32.3831	32.2283	32.1995		34.3523	5	34.1495	34.1037	34.1995		32.8988	6	32.718	32.8407	32.7378		34.6902	5	34.3553	34.4253	34.5367		33.9602	5	34.0742	33.9188	33.9386		34.979	5	34.9677	34.8327	34.8298		34.5785	5
34.0883	5	34.1085	34.0585	34.0699		34.9218	5	34.8611	34.8832	34.9436		32.558	6	32.3893	32.2357	32.2058		34.3409	5	34.145	34.099	34.1952		32.9294	6	32.7261	32.8491	32.7451		34.6871	5	34.3518	34.4196	34.5328		33.9254	5	34.0714	33.9153	33.9349		34.985	5	34.9635	34.8279	34.825		34.5823	5
34.0808	5	34.1056	34.0573	34.0688		34.9225	5	34.8565	34.879	34.9401		32.5727	6	32.3954	32.2429	32.2121		34.3395	4	34.1547	34.1095	34.2043		32.963	6	32.7342	32.8575	32.7523		34.682	5	34.3483	34.4138	34.529		33.8924	5	34.0687	33.9119	33.9313		34.9864	5	34.9593	34.8231	34.8202		34.5865	5
34.0786	5	34.1028	34.0561	34.0677		34.9284	5	34.852	34.8748	34.9366		32.5944	6	32.4016	32.2502	32.2183		34.3123	5	34.1501	34.1048	34.2		33.0024	6	32.7422	32.8658	32.7594		34.6814	5	34.3448	34.4081	34.5252		33.8599	5	34.0661	33.9084	33.9277		34.9859	5	34.9551	34.8184	34.8155		34.589	5
34.0756	5	34.0999	34.055	34.0666		34.9306	5	34.8474	34.8707	34.9331		32.612	6	32.4077	32.2574	32.2245		34.315	5	34.1456	34.1	34.1957		33.0342	6	32.7502	32.8741	32.7666		34.6807	5	34.3414	34.4023	34.5214		33.8388	5	34.0634	33.905	33.9241		34.9869	5	34.9509	34.8137	34.8107		34.5924	5
34.0826	4	34.1071	34.0637	34.0743		34.9368	5	34.8428	34.8666	34.9296		32.6242	6	32.4137	32.2645	32.2306		34.3158	5	34.1411	34.0953	34.1914		33.0575	6	32.7581	32.8823	32.7737		34.6759	5	34.3379	34.3966	34.5176		33.8233	5	34.0607	33.9017	33.9205		34.973	5	34.9468	34.809	34.806		34.5907	5
34.0812	5	34.1042	34.0625	34.0731		34.9456	5	34.8383	34.8625	34.9262		32.6379	6	32.4198	32.2716	32.2368		34.317	5	34.1367	34.0907	34.1872		33.0756	6	32.7661	32.8905	32.7808		34.6709	4	34.3454	34.4152	34.5315		33.8109	5	34.0581	33.8983	33.917		34.9617	5	34.9426	34.8044	34.8014		34.5888	5
34.0602	4	34.1113	34.0712	34.0808		34.9614	5	34.8338	34.8585	34.9229		32.6445	6	32.4258	32.2786	32.2429		34.3117	5	34.1322	34.0861	34.183		33.0929	6	32.774	32.8987	32.7878		34.6652	4	34.3528	34.4334	34.5453		33.7957	5	34.0555	33.895	33.9135		34.9561	5	34.9385	34.7998	34.7968		34.5886	5
34.0582	5	34.1084	34.0699	34.0795		34.9947	6	34.841	34.8671	34.9305		32.6568	6	32.4318	32.2856	32.2489		34.3226	5	34.1278	34.0815	34.1789		33.1079	6	32.7819	32.9068	32.7948		34.6554	5	34.3494	34.4277	34.5414		33.7818	5	34.0529	33.8917	33.91		34.9476	4	34.9439	34.808	34.8044		34.5894	5
34.0566	5	34.1055	34.0686	34.0781		35.0414	6	34.8481	34.8757	34.9381		32.6673	6	32.4378	32.2925	32.255		34.3335	5	34.1235	34.077	34.1748		33.1218	6	32.7897	32.9148	32.8018		34.6555	5	34.3459	34.4219	34.5375		33.7599	5	34.0503	33.8884	33.9066		34.9407	5	34.9398	34.8033	34.7997		34.5755	5
34.0571	5	34.1027	34.0674	34.0768		35.0995	6	34.8552	34.8842	34.9457		32.681	6	32.4438	32.2994	32.261		34.3384	5	34.1191	34.0725	34.1707		33.1357	6	32.7975	32.9229	32.8087		34.6552	5	34.3424	34.4161	34.5336		33.7449	5	34.0477	33.8852	33.9031		34.9341	5	34.9357	34.7987	34.7951		34.5655	5
34.0663	5	34.0998	34.0661	34.0755		35.1601	6	34.8623	34.8927	34.9532		32.6943	4	32.4498	32.3063	32.2669		34.3461	5	34.1148	34.0681	34.1667		33.1542	6	32.8053	32.9308	32.8156		34.6559	5	34.339	34.4104	34.5298		33.7343	5	34.0452	33.8819	33.8998		34.9383	5	34.9315	34.7941	34.7906		34.5583	5
34.0744	5	34.097	34.0649	34.0742		35.2203	6	34.8693	34.9011	34.9607		32.6791	4	32.4557	32.3131	32.2729		34.3369	5	34.1105	34.0636	34.1627		33.1681	6	32.8131	32.9388	32.8225		34.6584	5	34.3355	34.4046	34.526		33.7305	5	34.0427	33.8787	33.8964		34.936	5	34.9274	34.7896	34.786		34.5559	5
34.0799	5	34.0942	34.0638	34.073		35.2762	6	34.8764	34.9095	34.9681		32.6456	4	32.4616	32.3198	32.2788		34.3438	5	34.1063	34.0593	34.1588		33.1688	6	32.8208	32.9467	32.8293		34.6628	5	34.3321	34.3989	34.5222		33.7201	5	34.0401	33.8755	33.8931		34.9388	5	34.9233	34.7851	34.7815		34.5573	5
34.0865	5	34.0914	34.0626	34.0717		35.3233	6	34.8834	34.9178	34.9755		32.6033	5	32.4569	32.3145	32.2739		34.3363	5	34.1021	34.0549	34.1549		33.172	6	32.8285	32.9545	32.8361		34.6623	5	34.3286	34.3932	34.5184		33.7049	5	34.0376	33.8724	33.8898		34.9415	5	34.9192	34.7806	34.7771		34.5604	5
34.0886	5	34.0886	34.0615	34.0705		35.3673	6	34.8904	34.926	34.9829		32.5577	5	32.4522	32.3093	32.269		34.3482	5	34.0979	34.0506	34.151		33.1724	6	32.8362	32.9623	32.8429		34.6556	5	34.3252	34.3875	34.5147		33.692	5	34.0352	33.8692	33.8865		34.9455	5	34.9152	34.7761	34.7726		34.5676	5
34.0909	5	34.0858	34.0604	34.0693		35.3955	6	34.8973	34.9343	34.9902		32.5139	5	32.4476	32.3041	32.2643		34.3502	5	34.0937	34.0463	34.1472		33.1703	6	32.8438	32.9701	32.8497		34.6506	5	34.3218	34.3818	34.511		33.6787	5	34.0327	33.8661	33.8833		34.9408	5	34.9111	34.7716	34.7682		34.5735	5
34.1001	4	34.093	34.0691	34.0769		35.4137	6	34.9043	34.9424	34.9975		32.4719	5	32.443	32.2989	32.2596		34.3526	5	34.0896	34.0421	34.1434		33.1696	6	32.8514	32.9778	32.8564		34.6517	5	34.3183	34.3761	34.5073		33.6686	5	34.0302	33.863	33.88		34.9418	5	34.907	34.7672	34.7639		34.5755	5
34.0911	5	34.0902	34.0679	34.0756		35.4389	6	34.9112	34.9505	35.0047		32.4344	5	32.4384	32.2938	32.2549		34.3487	5	34.0855	34.0379	34.1397		33.1782	6	32.859	32.9855	32.863		34.6598	5	34.3149	34.3704	34.5036		33.66	4	34.0399	33.8741	33.8913		34.9369	5	34.903	34.7628	34.7595		34.5806	5
34.0868	5	34.0874	34.0667	34.0743		35.4665	6	34.9181	34.9585	35.012		32.4015	4	32.4443	32.3006	32.2609		34.3498	5	34.0814	34.0337	34.1359		33.1853	6	32.8666	32.9932	32.8697		34.6655	5	34.3115	34.3648	34.5		33.6456	4	34.0495	33.8851	33.9026		34.9351	5	34.899	34.7584	34.7552		34.5827	5
34.0904	5	34.0846	34.0655	34.073		35.463	6	34.925	34.9665	35.0192		32.3795	4	32.4503	32.3074	32.2669		34.3442	5	34.0773	34.0296	34.1322		33.1965	6	32.8741	33.0008	32.8763		34.6673	5	34.3081	34.3591	34.4964		33.6266	5	34.0469	33.8818	33.8992		34.9292	5	34.8949	34.7541	34.751		34.5825	5
34.0955	5	34.0819	34.0643	34.0717		35.4454	6	34.9319	34.9745	35.0263		32.3541	5	32.4457	32.3022	32.2621		34.3397	5	34.0733	34.0255	34.1286		33.2081	6	32.8816	33.0084	32.8829		34.6703	5	34.3047	34.3535	34.4928		33.6141	5	34.0444	33.8786	33.8959		34.9234	5	34.8909	34.7498	34.7467		34.5752	5
34.0993	5	34.0791	34.0631	34.0704		35.4075	4	34.9387	34.9824	35.0334		32.3351	5	32.441	32.297	32.2574		34.3323	5	34.0693	34.0214	34.125		33.2161	6	32.8891	33.0159	32.8894		34.6725	6	34.3122	34.3726	34.507		33.6107	5	34.0418	33.8754	33.8926		34.9129	5	34.8869	34.7455	34.7425		34.5746	5
34.105	5	34.0764	34.062	34.0691		35.3593	4	34.9455	34.9902	35.0405		32.3256	5	32.4364	32.2919	32.2527		34.3342	5	34.0653	34.0174	34.1214		33.2196	6	32.8965	33.0234	32.8959		34.6783	6	34.3198	34.3914	34.5211		33.6062	5	34.0393	33.8722	33.8893		34.9069	5	34.8829	34.7412	34.7383		34.5761	5
34.1101	5	34.0737	34.0609	34.0679		35.3102	5	34.9406	34.985	35.0358		32.3192	5	32.4319	32.2867	32.2482		34.3316	5	34.0614	34.0134	34.1179		33.2236	6	32.9039	33.0308	32.9024		34.6933	6	34.3273	34.41	34.5351		33.6022	5	34.0368	33.8691	33.886		34.908	5	34.8789	34.7369	34.7342		34.5739	5
34.1128	5	34.071	34.0597	34.0666		35.2644	5	34.9356	34.9799	35.0312		32.3161	5	32.4273	32.2817	32.2436		34.3376	5	34.0575	34.0094	34.1144		33.2127	6	32.9113	33.0383	32.9088		34.7098	6	34.3348	34.4283	34.5489		33.5974	5	34.0343	33.866	33.8828		34.9092	4	34.8845	34.7456	34.7423		34.5721	5
34.1188	5	34.0683	34.0587	34.0654		35.2363	5	34.9307	34.9748	35.0266		32.3118	5	32.4228	32.2766	32.2391		34.3326	5	34.0536	34.0055	34.1109		33.2077	6	32.9187	33.0456	32.9153		34.7339	6	34.3423	34.4463	34.5626		33.5992	5	34.0319	33.8628	33.8796		34.8919	4	34.8901	34.7542	34.7503		34.5721	5
34.1223	5	34.0657	34.0576	34.0642		35.2189	5	34.9258	34.9697	35.0221		32.3043	4	32.4288	32.2835	32.2452		34.3312	4	34.0637	34.0165	34.1205		33.2132	6	32.926	33.053	32.9216		34.7705	6	34.3498	34.4641	34.5761		33.6009	5	34.0294	33.8598	33.8764		34.88	5	34.8861	34.7499	34.7461		34.5694	5
34.124	5	34.063	34.0565	34.063		35.2011	5	34.9209	34.9647	35.0176		32.295	4	32.4348	32.2904	32.2512		34.3276	5	34.0598	34.0125	34.1169		33.2183	6	32.9333	33.0603	32.928		34.8041	6	34.3572	34.4817	34.5895		33.5989	5	34.027	33.8567	33.8732		34.8872	5	34.8821	34.7456	34.7419		34.5713	5
34.1353	6	34.0703	34.0653	34.0707		35.1902	5	34.9161	34.9597	35.0132		32.2766	5	32.4303	32.2853	32.2466		34.33	5	34.0559	34.0085	34.1134		33.2188	6	32.9406	33.0675	32.9343		34.8503	4	34.3646	34.4989	34.6028		33.5934	5	34.0246	33.8537	33.8701		34.8909	5	34.8782	34.7413	34.7377		34.5735	5
34.157	6	34.0775	34.0739	34.0784		35.187	5	34.9113	34.9548	35.0088		32.265	5	32.4257	32.2802	32.242		34.3298	5	34.052	34.0046	34.1099		33.2139	6	32.9479	33.0748	32.9406		34.8539	4	34.372	34.516	34.6159		33.5889	5	34.0222	33.8506	33.8669		34.8932	5	34.8742	34.7371	34.7336		34.5748	5
34.1901	6	34.0847	34.0826	34.086		35.1922	5	34.9064	34.9499	35.0044		32.2577	5	32.4212	32.2752	32.2376		34.3327	5	34.0481	34.0007	34.1065		33.2117	4	32.9551	33.0819	32.9469		34.8299	4	34.3794	34.5328	34.6289		33.5793	5	34.0198	33.8476	33.8638		34.8934	5	34.8702	34.7329	34.7295		34.5767	6
34.2227	6	34.0919	34.0912	34.0935		35.1973	5	34.9016	34.945	35.0001		32.2575	5	32.4167	32.2702	32.2331		34.3389	5	34.0443	33.9968	34.1031		33.2011	4	32.9623	33.0891	32.9531		34.7958	5	34.3759	34.5267	34.6245		33.5728	5	34.0175	33.8447	33.8608		34.8985	5	34.8663	34.7287	34.7254		34.5899	6
34.2518	6	34.099	34.0997	34.1011		35.1958	5	34.8969	34.9402	34.9958		32.2528	4	32.4228	32.2771	32.2392		34.3453	5	34.0405	33.993	34.0997		33.1808	4	32.9695	33.0962	32.9593		34.765	5	34.3724	34.5207	34.6201		33.5728	5	34.0151	33.8417	33.8577		34.8937	5	34.8623	34.7246	34.7214		34.6148	6
34.2981	6	34.1062	34.1082	34.1086		35.1926	5	34.8921	34.9354	34.9916		32.2431	4	32.4288	32.284	32.2452		34.355	5	34.0368	33.9892	34.0964		33.1471	4	32.9766	33.1033	32.9655		34.7465	5	34.3689	34.5147	34.6157		33.5735	5	34.0128	33.8388	33.8547		34.8957	5	34.8584	34.7204	34.7174		34.6559	6
34.3459	6	34.1133	34.1166	34.116		35.1884	5	34.8874	34.9307	34.9874		32.2332	4	32.4348	32.2909	32.2512		34.3546	5	34.033	33.9854	34.0931		33.1136	4	32.9838	33.1103	32.9716		34.7251	5	34.3654	34.5087	34.6114		33.5662	5	34.0105	33.8359	33.8517		34.9024	5	34.8545	34.7163	34.7134		34.6935	6
34.3509	6	34.1203	34.125	34.1234		35.1825	5	34.8827	34.926	34.9833		32.2214	5	32.4302	32.2857	32.2466		34.3588	5	34.0293	33.9816	34.0898		33.0829	5	32.9772	33.1044	32.9658		34.7133	5	34.3619	34.5028	34.6071		33.5559	5	34.0082	33.833	33.8487		34.8919	5	34.8506	34.7122	34.7094		34.7401	6
34.3555	6	34.1274	34.1333	34.1308		35.1776	5	34.878	34.9213	34.9792		32.2166	5	32.4257	32.2806	32.2421		34.3558	5	34.0256	33.9779	34.0866		33.0497	5	32.9707	33.0985	32.9601		34.709	5	34.3584	34.4968	34.6028		33.5466	5	34.0059	33.8301	33.8458		34.8804	5	34.8467	34.7082	34.7055		34.7863	6
34.3901	6	34.1344	34.1416	34.1382		35.1782	5	34.8733	34.9167	34.9751		32.2111	5	32.4212	32.2755	32.2376		34.3515	5	34.0219	33.9742	34.0834		33.016	5	32.9642	33.0927	32.9544		34.7071	5	34.3549	34.4909	34.5986		33.54	5	34.0036	33.8273	33.8428		34.8712	5	34.8428	34.7042	34.7016		34.8245	6
34.4244	6	34.1414	34.1499	34.1455		35.1797	5	34.8687	34.9122	34.9711		32.2095	5	32.4167	32.2705	32.2331		34.3508	5	34.0183	33.9706	34.0802		32.991	5	32.9578	33.0869	32.9487		34.7066	6	34.3624	34.508	34.6117		33.5342	5	34.0013	33.8244	33.8399		34.8627	5	34.8389	34.7002	34.6977		34.8621	6
34.4555	6	34.1484	34.158	34.1527		35.1837	5	34.864	34.9077	34.9672		32.2103	5	32.4122	32.2654	32.2288		34.3486	5	34.0147	33.9669	34.077		32.9672	5	32.9514	33.0812	32.9431		34.7107	6	34.3698	34.5248	34.6248		33.5334	5	33.9991	33.8216	33.837		34.8594	5	34.835	34.6962	34.6939		34.8876	4
34.4822	4	34.1554	34.1662	34.1599		35.1733	5	34.8594	34.9032	34.9632		32.2119	5	32.4077	32.2605	32.2245		34.3409	5	34.0111	33.9633	34.0738		32.9471	5	32.9451	33.0755	32.9376		34.7202	6	34.3771	34.5414	34.6377		33.5314	5	33.9969	33.8188	33.8341		34.8537	5	34.8312	34.6922	34.6901		34.8799	4
34.4687	4	34.1623	34.1742	34.1671		35.1617	5	34.8548	34.8988	34.9594		32.2156	5	32.4033	32.2555	32.2202		34.3374	5	34.0075	33.9598	34.0707		32.9228	5	32.9388	33.0699	32.9321		34.734	6	34.3845	34.5578	34.6504		33.5303	5	33.9947	33.8161	33.8313		34.8552	5	34.8273	34.6883	34.6863		34.8509	4
34.4484	4	34.1692	34.1823	34.1743		35.1508	5	34.8502	34.8944	34.9555		32.2175	5	32.3989	32.2506	32.216		34.3255	5	34.004	33.9562	34.0676		32.9051	5	32.9325	33.0643	32.9267		34.7648	6	34.3918	34.574	34.663		33.5277	5	33.9925	33.8133	33.8284		34.8583	5	34.8235	34.6844	34.6825		34.8145	4
34.4178	4	34.1761	34.1902	34.1814		35.1495	5	34.8457	34.89	34.9517		32.2166	5	32.3945	32.2458	32.2119		34.3213	5	34.0005	33.9527	34.0645		32.8879	5	32.9263	33.0588	32.9213		34.8135	6	34.3991	34.5899	34.6755		33.5243	5	33.9903	33.8106	33.8256		34.8569	5	34.8196	34.6805	34.6788		34.7796	4
34.381	4	34.183	34.1982	34.1885		35.1516	5	34.8411	34.8857	34.9479		32.2115	5	32.3901	32.2409	32.2078		34.3317	5	33.997	33.9492	34.0615		32.8699	4	32.9336	33.0661	32.9277		34.8561	6	34.4064	34.6057	34.6878		33.5213	5	33.9881	33.8079	33.8228		34.8571	4	34.8254	34.6896	34.6873		34.7618	4
34.3517	5	34.1797	34.195	34.1851		35.1587	5	34.8366	34.8814	34.9442		32.1985	4	32.3963	32.248	32.214		34.3277	5	33.9935	33.9458	34.0585		32.8536	4	32.9409	33.0733	32.934		34.9003	6	34.4137	34.6211	34.7		33.5202	5	33.9859	33.8052	33.82		34.8446	4	34.8312	34.6986	34.6957		34.7497	4
34.3242	5	34.1764	34.1919	34.1818		35.1637	5	34.8321	34.8771	34.9405		32.1863	5	32.3919	32.2432	32.2099		34.3283	5	33.9901	33.9424	34.0555		32.8369	4	32.9481	33.0805	32.9403		34.9426	6	34.421	34.6364	34.712		33.5077	5	33.9838	33.8026	33.8173		34.8399	4	34.8369	34.7076	34.704		34.7388	4
34.3079	5	34.1732	34.1888	34.1786		35.1509	5	34.8276	34.8729	34.9368		32.1713	5	32.3875	32.2383	32.2059		34.3377	5	33.9867	33.939	34.0525		32.824	5	32.9418	33.0748	32.9348		34.9632	4	34.4282	34.6515	34.724		33.4992	5	33.9817	33.7999	33.8145		34.8342	4	34.8427	34.7165	34.7123		34.7392	4
34.2909	5	34.17	34.1857	34.1754		35.1261	5	34.8232	34.8687	34.9332		32.1654	5	32.3832	32.2336	32.2019		34.3552	6	33.997	33.9503	34.0624		32.8177	5	32.9355	33.0692	32.9293		34.9378	4	34.4354	34.6663	34.7357		33.5025	5	33.9796	33.7973	33.8118		34.8213	4	34.8484	34.7253	34.7206		34.7459	4
34.2861	4	34.1769	34.1937	34.1825		35.113	5	34.8187	34.8645	34.9296		32.161	4	32.3894	32.2407	32.2081		34.3695	6	34.0073	33.9615	34.0721		32.8159	5	32.9293	33.0637	32.9239		34.9041	4	34.4426	34.681	34.7474		33.507	5	33.9775	33.7947	33.8091		34.8119	4	34.8541	34.7341	34.7288		34.7379	5
34.2725	5	34.1736	34.1906	34.1792		35.1059	5	34.8143	34.8604	34.9261		32.163	5	32.385	32.2359	32.204		34.3703	6	34.0175	33.9727	34.0819		32.8133	5	32.9231	33.0582	32.9186		34.8727	4	34.4497	34.6954	34.759		33.5096	5	33.9754	33.7922	33.8064		34.7977	4	34.8597	34.7428	34.7369		34.7218	5
34.269	5	34.1704	34.1875	34.176		35.0994	5	34.8099	34.8563	34.9225		32.1615	5	32.3807	32.2311	32.2		34.3714	6	34.0278	33.9838	34.0915		32.8088	5	32.9169	33.0527	32.9133		34.8368	4	34.4568	34.7096	34.7704		33.5173	5	33.9733	33.7896	33.8037		34.7822	5	34.8558	34.7386	34.7328		34.7109	4
34.2711	5	34.1672	34.1845	34.1729		35.0937	5	34.8055	34.8522	34.919		32.1634	5	32.3764	32.2264	32.196		34.3869	6	34.0379	33.9949	34.1012		32.8047	5	32.9108	33.0473	32.908		34.8056	5	34.4532	34.7032	34.765		33.5237	5	33.9713	33.7871	33.8011		34.7823	5	34.8519	34.7344	34.7287		34.7008	5
34.2733	5	34.164	34.1815	34.1698		35.0932	5	34.8012	34.8482	34.9156		32.1637	5	32.3721	32.2216	32.1921		34.4179	6	34.0481	34.0059	34.1107		32.8029	5	32.9047	33.0419	32.9029		34.7733	5	34.4496	34.6968	34.7596		33.5231	5	33.9692	33.7846	33.7985		34.7742	5	34.848	34.7302	34.7246		34.6889	5
34.2777	5	34.1608	34.1786	34.1668		35.0943	5	34.7968	34.8442	34.9122		32.1667	5	32.3679	32.217	32.1882		34.46	6	34.0582	34.0169	34.1203		32.8001	5	32.8986	33.0366	32.8977		34.7472	5	34.446	34.6904	34.7543		33.5254	5	33.9672	33.7821	33.7959		34.765	5	34.8441	34.7261	34.7206		34.6811	5
34.2813	5	34.1576	34.1757	34.1638		35.0939	5	34.7925	34.8402	34.9088		32.1703	5	32.3636	32.2123	32.1844		34.4935	4	34.0682	34.0278	34.1298		32.7937	5	32.8926	33.0314	32.8926		34.7214	5	34.4424	34.6841	34.749		33.5273	5	33.9652	33.7796	33.7933		34.7619	5	34.8402	34.7219	34.7166		34.6716	5
34.2891	5	34.1545	34.1728	34.1609		35.095	5	34.7882	34.8363	34.9054		32.174	5	32.3594	32.2077	32.1806		34.4844	4	34.0783	34.0386	34.1392		32.7854	5	32.8866	33.0261	32.8876		34.7062	5	34.4388	34.6777	34.7437		33.5262	5	33.9632	33.7772	33.7907		34.753	5	34.8363	34.7179	34.7126		34.6701	5
34.2973	5	34.1514	34.17	34.1581		35.0891	5	34.7839	34.8324	34.9021		32.1784	5	32.3552	32.2031	32.1769		34.4603	4	34.0882	34.0494	34.1486		32.7754	5	32.8807	33.021	32.8826		34.6939	5	34.4352	34.6714	34.7384		33.5229	5	33.9612	33.7748	33.7882		34.7458	5	34.8325	34.7138	34.7086		34.6632	5
34.2903	5	34.1483	34.1673	34.1553		35.0824	5	34.7796	34.8285	34.8989		32.1739	5	32.351	32.1985	32.1732		34.4403	4	34.0982	34.0601	34.1579		32.7651	5	32.8748	33.0159	32.8777		34.684	5	34.4316	34.665	34.7332		33.519	5	33.9592	33.7724	33.7856		34.7445	5	34.8286	34.7097	34.7047		34.657	5
34.2839	5	34.1452	34.1646	34.1525		35.0778	5	34.7753	34.8247	34.8956		32.1631	5	32.3469	32.194	32.1696		34.4192	4	34.1081	34.0708	34.1672		32.7594	5	32.869	33.0108	32.8728		34.6661	5	34.4281	34.6587	34.728		33.5173	5	33.9572	33.77	33.7831		34.7498	5	34.8248	34.7057	34.7008		34.6574	4
34.2727	5	34.1421	34.1619	34.1498		35.0743	5	34.7711	34.8208	34.8924		32.1601	5	32.3427	32.1895	32.166		34.4001	5	34.1039	34.0663	34.1631		32.7521	5	32.8631	33.0058	32.8679		34.6462	6	34.4353	34.6735	34.7397		33.5139	5	33.9553	33.7676	33.7806		34.7425	5	34.8209	34.7017	34.6969		34.6537	4
34.2712	5	34.139	34.1593	34.1471		35.0735	5	34.7669	34.817	34.8892		32.1555	5	32.3386	32.1851	32.1624		34.381	5	34.0997	34.0618	34.1591		32.7465	5	32.8574	33.0008	32.8631		34.6393	6	34.4424	34.688	34.7512		33.5099	5	33.9533	33.7653	33.7782		34.7392	5	34.8171	34.6978	34.6931		34.6443	4
34.279	5	34.136	34.1567	34.1445		35.0817	5	34.7627	34.8133	34.886		32.1537	5	32.3345	32.1806	32.1589		34.3759	5	34.0955	34.0574	34.1551		32.7462	5	32.8516	32.9958	32.8584		34.6369	6	34.4496	34.7024	34.7627		33.5015	5	33.9514	33.763	33.7757		34.7423	5	34.8133	34.6938	34.6893		34.6449	4
34.2834	5	34.1329	34.1541	34.142		35.0873	5	34.7585	34.8095	34.8829		32.157	5	32.3305	32.1763	32.1554		34.3659	5	34.0913	34.053	34.1511		32.7458	5	32.8459	32.9909	32.8537		34.6414	6	34.4567	34.7165	34.7739		33.4946	5	33.9495	33.7607	33.7733		34.7325	5	34.8095	34.6899	34.6855		34.6517	4
34.2896	5	34.1299	34.1516	34.1395		35.0886	5	34.7543	34.8058	34.8798		32.1663	5	32.3264	32.1719	32.152		34.3586	5	34.0872	34.0487	34.1472		32.7325	4	32.8535	32.9986	32.8603		34.6564	6	34.4638	34.7304	34.7851		33.4897	5	33.9476	33.7584	33.7708		34.7228	5	34.8057	34.686	34.6817		34.6646	4
34.2962	5	34.1269	34.1491	34.137		35.0901	5	34.7502	34.8021	34.8767		32.1733	5	32.3224	32.1676	32.1485		34.3521	5	34.0831	34.0443	34.1433		32.7152	5	32.8478	32.9937	32.8556		34.6675	6	34.4709	34.7442	34.7961		33.4882	5	33.9457	33.7561	33.7684		34.7085	5	34.8019	34.6821	34.678		34.6852	4
34.3005	5	34.124	34.1467	34.1345		35.0956	5	34.746	34.7984	34.8736		32.1811	5	32.3183	32.1633	32.1452		34.3546	5	34.0791	34.0401	34.1395		32.705	5	32.8421	32.9888	32.8509		34.6511	6	34.478	34.7578	34.8071		33.4913	5	33.9438	33.7539	33.7661		34.7003	5	34.7981	34.6783	34.6743		34.7059	4
34.3088	5	34.121	34.1443	34.1321		35.0997	5	34.7419	34.7948	34.8706		32.1899	5	32.3143	32.159	32.1418		34.3599	5	34.075	34.0358	34.1357		32.7007	5	32.8364	32.984	32.8463		34.6323	6	34.4851	34.7711	34.8178		33.4922	5	33.942	33.7516	33.7637		34.6943	5	34.7944	34.6744	34.6706		34.7195	4
34.3038	5	34.1181	34.1419	34.1298		35.0966	4	34.7493	34.8037	34.8784		32.1982	5	32.3104	32.1547	32.1385		34.3559	5	34.071	34.0316	34.1319		32.7045	5	32.8308	32.9792	32.8417		34.6171	6	34.4921	34.7843	34.8285		33.4877	5	33.9401	33.7494	33.7613		34.695	5	34.7906	34.6706	34.6669		34.7334	4
34.2991	5	34.1151	34.1395	34.1275		35.0845	4	34.7568	34.8125	34.8861		32.2066	5	32.3064	32.1505	32.1353		34.3692	5	34.0671	34.0275	34.1282		32.7061	5	32.8252	32.9744	32.8372		34.614	6	34.4991	34.7973	34.8391		33.4865	5	33.9383	33.7472	33.759		34.6962	4	34.7965	34.6798	34.6755		34.7541	4
34.3024	5	34.1122	34.1372	34.1252		35.0561	4	34.7642	34.8213	34.8938		32.2111	5	32.3025	32.1464	32.132		34.3768	6	34.0771	34.0383	34.1376		32.7056	5	32.8197	32.9697	32.8327		34.6179	6	34.5061	34.8101	34.8495		33.4873	5	33.9364	33.7451	33.7567		34.6741	5	34.7927	34.676	34.6718		34.7724	4
34.3001	5	34.1093	34.1349	34.1229		35.0356	5	34.76	34.8175	34.8905		32.2048	5	32.2985	32.1422	32.1289		34.3895	6	34.0871	34.0491	34.147		32.7016	5	32.8142	32.9651	32.8282		34.6252	6	34.513	34.8228	34.8598		33.4874	5	33.9346	33.7429	33.7544		34.6632	5	34.789	34.6722	34.6682		34.7911	4
34.2921	5	34.1064	34.1327	34.1207		35.0171	5	34.7558	34.8136	34.8873		32.1964	4	32.305	32.1498	32.1354		34.4022	4	34.097	34.0599	34.1564		32.6998	5	32.8087	32.9605	32.8238		34.6411	6	34.52	34.8352	34.87		33.4911	5	33.9328	33.7408	33.7521		34.6636	5	34.7852	34.6684	34.6646		34.7998	4
34.2866	5	34.1036	34.1304	34.1186		35.0127	5	34.7516	34.8098	34.8841		32.1849	5	32.3011	32.1457	32.1322		34.4131	4	34.1069	34.0705	34.1656		32.6948	5	32.8033	32.9559	32.8195		34.6535	6	34.5269	34.8475	34.8801		33.4938	5	33.931	33.7387	33.7498		34.6642	5	34.7815	34.6647	34.661		34.8082	4
34.2803	5	34.1007	34.1282	34.1164		35.0177	5	34.7475	34.8061	34.8809		32.1784	5	32.2971	32.1415	32.129		34.4133	5	34.1027	34.0661	34.1616		32.6894	5	32.7979	32.9514	32.8152		34.6736	6	34.5338	34.8596	34.8901		33.5009	5	33.9293	33.7366	33.7476		34.6647	5	34.7778	34.6609	34.6574		34.8076	4
34.2789	5	34.0979	34.1261	34.1143		35.0278	5	34.7434	34.8023	34.8777		32.1881	4	32.3036	32.1491	32.1355		34.4076	5	34.0985	34.0616	34.1576		32.6849	5	32.7925	32.9469	32.8109		34.7035	6	34.5407	34.8716	34.8999		33.509	5	33.9275	33.7345	33.7454		34.6682	5	34.774	34.6572	34.6538		34.8038	4
34.2743	5	34.095	34.1239	34.1123		35.0335	5	34.7393	34.7986	34.8746		32.1953	5	32.2997	32.145	32.1323		34.4056	5	34.0943	34.0572	34.1536		32.6802	5	32.7872	32.9425	32.8066		34.7292	6	34.5475	34.8833	34.9097		33.5045	5	33.9257	33.7324	33.7431		34.678	5	34.7703	34.6535	34.6503		34.8085	4
34.2717	5	34.0922	34.1218	34.1103		35.0373	5	34.7352	34.795	34.8715		32.2	5	32.2958	32.1408	32.1291		34.4042	5	34.0902	34.0528	34.1497		32.6767	5	32.7819	32.9381	32.8024		34.7723	6	34.5544	34.8949	34.9193		33.503	5	33.924	33.7304	33.7409		34.6838	5	34.7666	34.6499	34.6468		34.8139	4
34.2655	5	34.0894	34.1197	34.1083		35.0356	5	34.7311	34.7913	34.8684		32.2099	5	32.2919	32.1367	32.1259		34.3995	5	34.0861	34.0485	34.1458		32.6733	5	32.7766	32.9337	32.7983		34.8215	6	34.5612	34.9064	34.9288		33.507	5	33.9223	33.7283	33.7388		34.687	5	34.763	34.6462	34.6434		34.838	4
34.2623	5	34.0867	34.1176	34.1063		35.0323	5	34.727	34.7877	34.8654		32.2179	5	32.288	32.1326	32.1229		34.4058	5	34.082	34.0442	34.1419		32.6727	5	32.7714	32.9294	32.7942		34.8584	6	34.568	34.9177	34.9382		33.4989	5	33.9205	33.7263	33.7366		34.6983	5	34.7593	34.6426	34.6399		34.8545	4
34.2553	5	34.0839	34.1156	34.1044		35.0297	5	34.723	34.7842	34.8624		32.2309	5	32.2842	32.1285	32.1198		34.4206	5	34.078	34.0399	34.1381		32.6756	5	32.7662	32.9251	32.7901		34.8758	6	34.5747	34.9289	34.9476		33.4997	5	33.9188	33.7243	33.7344		34.6951	5	34.7556	34.639	34.6365		34.8612	4
34.2574	5	34.0812	34.1136	34.1025		35.0315	5	34.719	34.7806	34.8594		32.2292	5	32.2803	32.1245	32.1168		34.4181	5	34.0739	34.0357	34.1343		32.6827	5	32.761	32.9208	32.7861		34.8744	6	34.5815	34.9399	34.9568		33.5012	5	33.9171	33.7223	33.7323		34.6961	5	34.752	34.6354	34.6331		34.8551	4
34.264	5	34.0784	34.1116	34.1007		35.0313	5	34.715	34.7771	34.8565		32.2208	5	32.2765	32.1205	32.1138		34.4277	5	34.0699	34.0315	34.1306		32.6739	4	32.7689	32.9288	32.7931		34.8772	6	34.5882	34.9508	34.9659		33.5064	5	33.9154	33.7204	33.7302		34.7067	6	34.7579	34.6449	34.6419		34.8504	4
34.2668	5	34.0757	34.1096	34.0989		35.0256	5	34.711	34.7736	34.8535		32.2045	4	32.283	32.1282	32.1204		34.4309	6	34.0799	34.0424	34.14		32.6562	4	32.7768	32.9368	32.8		34.8867	6	34.5949	34.9615	34.9749		33.5121	5	33.9138	33.7184	33.7281		34.7205	6	34.7639	34.6543	34.6507		34.8517	4
34.2331	5	34.073	34.1076	34.0971		35.0282	6	34.7185	34.7826	34.8613		32.2135	4	32.2895	32.136	32.127		34.4388	6	34.0899	34.0532	34.1494		32.6425	4	32.7847	32.9447	32.807		34.8975	4	34.6016	34.9721	34.9838		33.5121	5	33.9121	33.7165	33.726		34.7409	6	34.7698	34.6637	34.6594		34.8515	4
34.2421	5	34.0703	34.1057	34.0954		35.0382	6	34.726	34.7916	34.8691		32.2115	5	32.2857	32.1319	32.1238		34.4565	4	34.0999	34.0639	34.1587		32.6301	5	32.7794	32.9403	32.8028		34.8751	4	34.6083	34.9826	34.9925		33.5137	5	33.9104	33.7146	33.7239		34.7588	6	34.7758	34.6729	34.6681		34.8548	4
34.2494	5	34.0676	34.1037	34.0937		35.0587	6	34.7335	34.8005	34.8768		32.2107	5	32.2818	32.1278	32.1208		34.4517	4	34.1098	34.0746	34.168		32.6223	5	32.7741	32.9359	32.7986		34.8442	4	34.615	34.9929	35.0012		33.519	5	33.9088	33.7127	33.7219		34.7806	6	34.7817	34.6822	34.6766		34.8673	4
34.2564	5	34.065	34.1018	34.092		35.0954	6	34.741	34.8093	34.8845		32.217	5	32.278	32.1237	32.1177		34.4387	5	34.1055	34.0701	34.1639		32.6211	5	32.7689	32.9315	32.7945		34.8151	4	34.6216	35.0031	35.0098		33.5268	5	33.9072	33.7108	33.7198		34.8052	6	34.7876	34.6913	34.6852		34.8852	4
34.2584	5	34.0623	34.1	34.0904		35.1357	6	34.7484	34.8181	34.8922		32.2269	5	32.2742	32.1197	32.1148		34.4293	5	34.1013	34.0656	34.1598		32.6234	5	32.7637	32.9272	32.7904		34.7846	5	34.6177	34.996	35.0027		33.5337	5	33.9055	33.709	33.7178		34.8465	6	34.7934	34.7004	34.6936		34.9079	4
34.2537	5	34.0597	34.0981	34.0888		35.1857	6	34.7559	34.8269	34.8998		32.2286	5	32.2704	32.1157	32.1118		34.4302	5	34.0971	34.0612	34.1558		32.6243	5	32.7586	32.923	32.7863		34.7545	5	34.6139	34.989	34.9956		33.5389	5	33.9039	33.7071	33.7158		34.8917	6	34.7993	34.7095	34.7021		34.93	4
34.2555	5	34.0571	34.0962	34.0873		35.2282	4	34.7632	34.8355	34.9074		32.2319	5	32.2667	32.1118	32.1089		34.433	5	34.093	34.0568	34.1518		32.6232	5	32.7535	32.9187	32.7823		34.7284	5	34.6101	34.982	34.9885		33.538	5	33.9023	33.7053	33.7138		34.9293	6	34.8051	34.7184	34.7104		34.963	4
34.244	5	34.0545	34.0944	34.0858		35.226	4	34.7706	34.8442	34.9149		32.2381	5	32.2629	32.1079	32.106		34.4346	5	34.0888	34.0524	34.1479		32.6222	5	32.7484	32.9145	32.7784		34.719	5	34.6062	34.975	34.9815		33.5364	5	33.9007	33.7034	33.7118		34.9619	6	34.811	34.7273	34.7187		34.9868	4
34.2397	5	34.0519	34.0926	34.0843		35.1953	4	34.778	34.8527	34.9224		32.2428	5	32.2592	32.104	32.1032		34.4358	5	34.0847	34.0481	34.144		32.6186	5	32.7433	32.9104	32.7745		34.7129	5	34.6024	34.968	34.9746		33.5394	5	33.8992	33.7016	33.7098		34.997	6	34.8168	34.7362	34.727		35.0082	4
34.2434	5	34.0493	34.0908	34.0828		35.161	4	34.7853	34.8613	34.9299		32.2291	4	32.2658	32.1118	32.1099		34.445	5	34.0806	34.0438	34.1401		32.6174	5	32.7383	32.9063	32.7706		34.7039	6	34.6091	34.9784	34.9835		33.5442	5	33.8976	33.6999	33.7078		35.0214	6	34.8225	34.745	34.7352		35.0282	4
34.2492	5	34.0468	34.0891	34.0814		35.1245	5	34.781	34.8571	34.9261		32.2183	4	32.2723	32.1196	32.1164		34.4493	5	34.0766	34.0396	34.1363		32.6162	5	32.7333	32.9022	32.7667		34.704	6	34.6157	34.9888	34.9922		33.5433	5	33.896	33.6981	33.7059		35.0358	6	34.8283	34.7537	34.7433		35.0393	4
34.2565	5	34.0442	34.0873	34.0801		35.0899	5	34.7767	34.8529	34.9223		32.2081	5	32.2686	32.1156	32.1135		34.4566	5	34.0726	34.0354	34.1325		32.6161	5	32.7283	32.8982	32.7629		34.71	6	34.6224	34.9989	35.0009		33.5495	5	33.8945	33.6963	33.704		35.047	6	34.8341	34.7623	34.7514		35.0553	4
34.2824	4	34.0515	34.0958	34.0877		35.0662	5	34.7725	34.8488	34.9186		32.1917	4	32.2751	32.1234	32.1201		34.46	5	34.0686	34.0312	34.1288		32.6112	5	32.7234	32.8942	32.7592		34.7185	6	34.629	35.0089	35.0095		33.5565	5	33.8929	33.6946	33.702		35.0579	6	34.8398	34.771	34.7594		35.0744	4
34.2616	5	34.049	34.094	34.0862		35.0507	5	34.7683	34.8447	34.9149		32.2023	5	32.2713	32.1193	32.117		34.4573	5	34.0646	34.0271	34.1251		32.6083	5	32.7185	32.8902	32.7554		34.7267	6	34.6356	35.0188	35.018		33.5508	5	33.8914	33.6929	33.7001		35.0594	6	34.8455	34.7795	34.7674		35.0918	4
34.2581	5	34.0464	34.0921	34.0848		35.0476	5	34.7641	34.8406	34.9113		32.2061	5	32.2675	32.1153	32.114		34.4625	6	34.0747	34.038	34.1346		32.6011	5	32.7137	32.8863	32.7517		34.7422	6	34.6421	35.0286	35.0263		33.5413	5	33.8899	33.6911	33.6982		35.0627	6	34.8512	34.788	34.7753		35.0976	4
34.2598	5	34.0439	34.0903	34.0834		35.0498	5	34.7599	34.8366	34.9077		32.2092	5	32.2638	32.1113	32.1111		34.4622	6	34.0847	34.0488	34.144		32.5934	5	32.7088	32.8824	32.7481		34.7594	6	34.6487	35.0382	35.0346		33.5469	5	33.8884	33.6894	33.6964		35.0616	6	34.8569	34.7964	34.7832		35.1019	4
34.2645	5	34.0413	34.0886	34.082		35.0471	5	34.7557	34.8326	34.9041		32.2135	5	32.2601	32.1074	32.1082		34.4677	6	34.0946	34.0595	34.1533		32.5916	5	32.704	32.8785	32.7444		34.777	6	34.6552	35.0477	35.0428		33.5502	5	33.8869	33.6878	33.6945		35.0572	4	34.8626	34.8048	34.791		35.1061	4
34.2633	5	34.0388	34.0868	34.0807		35.0416	5	34.7515	34.8286	34.9006		32.2185	5	32.2563	32.1034	32.1053		34.4735	6	34.1046	34.0703	34.1627		32.5911	5	32.6992	32.8747	32.7409		34.7969	6	34.6617	35.0571	35.0509		33.5545	5	33.8854	33.6861	33.6927		35.037	4	34.8682	34.8131	34.7988		35.1154	4
34.2702	5	34.0363	34.0851	34.0793		35.0382	5	34.7474	34.8247	34.8971		32.2242	5	32.2526	32.0995	32.1025		34.4972	6	34.1144	34.0809	34.1719		32.5891	5	32.6945	32.8709	32.7373		34.8246	6	34.6682	35.0664	35.0589		33.5561	5	33.8839	33.6844	33.6908		34.9901	4	34.8739	34.8214	34.8065		35.1219	4
34.2766	5	34.0338	34.0834	34.078		35.0328	5	34.7433	34.8208	34.8936		32.2253	5	32.249	32.0956	32.0997		34.5295	6	34.1243	34.0915	34.1812		32.5877	5	32.6898	32.8672	32.7338		34.8608	6	34.6747	35.0755	35.0668		33.5594	5	33.8825	33.6828	33.689		34.939	4	34.8795	34.8296	34.8141		35.1289	4
34.2913	5	34.0313	34.0817	34.0768		35.0254	5	34.7392	34.8169	34.8902		32.2265	5	32.2453	32.0918	32.0969		34.5565	6	34.1341	34.102	34.1903		32.5869	5	32.6851	32.8635	32.7303		34.902	6	34.6811	35.0845	35.0746		33.5647	5	33.881	33.6812	33.6872		34.9037	4	34.8851	34.8377	34.8217		35.1282	4
34.2989	4	34.0387	34.0902	34.0845		35.0158	4	34.7466	34.8257	34.8978		32.2195	5	32.2417	32.088	32.0942		34.5927	6	34.1439	34.1125	34.1995		32.5872	5	32.6805	32.8598	32.7268		34.9389	6	34.6875	35.0934	35.0824		33.5692	5	33.8795	33.6796	33.6854		34.8717	5	34.8811	34.833	34.8171		35.1261	4
34.2934	4	34.046	34.0986	34.0921		34.9878	5	34.7425	34.8217	34.8943		32.2117	5	32.238	32.0843	32.0915		34.6322	6	34.1536	34.123	34.2086		32.5898	5	32.6758	32.8561	32.7234		34.9731	6	34.6939	35.1021	35.09		33.5727	5	33.8781	33.678	33.6836		34.8432	5	34.8771	34.8284	34.8124		35.128	4
34.2928	5	34.0435	34.0967	34.0906		34.9659	5	34.7384	34.8178	34.8908		32.2099	5	32.2344	32.0805	32.0888		34.6651	6	34.1633	34.1333	34.2176		32.5916	5	32.6712	32.8525	32.72		34.9956	6	34.7003	35.1108	35.0976		33.5758	5	33.8767	33.6764	33.6818		34.8188	5	34.8732	34.8238	34.8078		35.1254	4
34.2873	5	34.041	34.0948	34.0891		34.9494	5	34.7343	34.814	34.8874		32.2111	5	32.2308	32.0768	32.0861		34.6858	6	34.1729	34.1437	34.2266		32.5923	5	32.6667	32.8489	32.7167		35.0236	6	34.7067	35.1193	35.1051		33.5766	5	33.8753	33.6748	33.6801		34.8002	5	34.8692	34.8192	34.8033		35.1288	4
34.3018	4	34.0483	34.1032	34.0967		34.937	5	34.7302	34.8102	34.884		32.214	5	32.2273	32.0732	32.0835		34.7152	6	34.1826	34.1539	34.2356		32.5919	5	32.6621	32.8454	32.7134		35.0457	6	34.713	35.1278	35.1125		33.581	5	33.8738	33.6732	33.6783		34.7853	5	34.8652	34.8147	34.7988		35.134	4
34.3142	5	34.0457	34.1012	34.0951		34.933	5	34.7262	34.8064	34.8806		32.2174	5	32.2237	32.0695	32.0809		34.7424	6	34.1921	34.1641	34.2445		32.5925	5	32.6576	32.8419	32.7101		35.0651	6	34.7194	35.1361	35.1198		33.5805	5	33.8724	33.6717	33.6766		34.7707	5	34.8613	34.8101	34.7943		35.1388	4
34.3235	5	34.0432	34.0992	34.0936		34.9326	5	34.7222	34.8026	34.8772		32.2246	5	32.2202	32.066	32.0783		34.7786	6	34.2017	34.1743	34.2533		32.587	5	32.6532	32.8384	32.7068		35.0855	6	34.7257	35.1443	35.1271		33.5805	5	33.871	33.6702	33.6749		34.771	5	34.8574	34.8056	34.7898		35.143	4
34.3277	5	34.0407	34.0972	34.092		34.9285	5	34.7181	34.7989	34.8739		32.2335	5	32.2166	32.0624	32.0757		34.8057	6	34.2112	34.1844	34.2621		32.5742	4	32.6615	32.8468	32.7142		35.0988	6	34.732	35.1524	35.1342		33.5778	5	33.8697	33.6686	33.6732		34.7654	5	34.8535	34.8012	34.7854		35.1504	4
34.3333	5	34.0381	34.0953	34.0905		34.9251	5	34.7141	34.7952	34.8706		32.242	5	32.2131	32.0589	32.0732		34.8269	6	34.2207	34.1945	34.2709		32.5605	4	32.6698	32.8552	32.7215		35.1161	6	34.7382	35.1604	35.1413		33.5787	5	33.8683	33.6671	33.6715		34.7556	5	34.8496	34.7967	34.781		35.1487	4
34.3422	5	34.0356	34.0933	34.089		34.9117	5	34.7102	34.7915	34.8674		32.2489	5	32.2097	32.0554	32.0707		34.8264	4	34.2301	34.2045	34.2796		32.5476	4	32.678	32.8635	32.7288		35.1239	6	34.7445	35.1683	35.1484		33.5832	5	33.8669	33.6656	33.6698		34.7529	5	34.8457	34.7923	34.7766		35.1502	4
34.343	5	34.0332	34.0914	34.0876		34.8979	5	34.7062	34.7878	34.8642		32.2594	5	32.2062	32.0519	32.0682		34.7963	4	34.2395	34.2145	34.2883		32.5365	4	32.6862	32.8718	32.7361		35.137	6	34.7507	35.176	35.1553		33.585	5	33.8656	33.6641	33.6682		34.7445	5	34.8418	34.7879	34.7723		35.1412	4
34.3476	5	34.0307	34.0896	34.0861		34.8778	5	34.7022	34.7842	34.861		32.2649	5	32.2027	32.0485	32.0657		34.7539	4	34.2489	34.2244	34.2969		32.527	4	32.6944	32.88	32.7433		35.1491	6	34.7569	35.1837	35.1622		33.5849	5	33.8642	33.6626	33.6666		34.7308	5	34.8379	34.7835	34.768		35.1445	4
34.3492	5	34.0282	34.0877	34.0847		34.8628	5	34.6983	34.7806	34.8578		32.2746	5	32.1993	32.0451	32.0633		34.7007	4	34.2582	34.2342	34.3055		32.5322	4	32.7026	32.8882	32.7505		35.1424	4	34.7631	35.1913	35.169		33.5911	5	33.8629	33.6612	33.6649		34.7306	5	34.834	34.7792	34.7637		35.1522	4
34.3464	5	34.0258	34.0859	34.0833		34.8554	5	34.6944	34.7771	34.8547		32.2893	6	32.2061	32.0533	32.0701		34.673	4	34.2675	34.244	34.3141		32.5435	4	32.7108	32.8964	32.7577		35.1206	4	34.7693	35.1988	35.1757		33.5995	5	33.8615	33.6597	33.6633		34.7309	5	34.8302	34.7749	34.7595		35.158	4
34.3431	5	34.0233	34.0841	34.082		34.8567	5	34.6905	34.7736	34.8516		32.3032	6	32.2128	32.0616	32.0768		34.6454	4	34.2768	34.2538	34.3226		32.5537	5	32.7059	32.8924	32.7539		35.0746	4	34.7755	35.2062	35.1824		33.6063	5	33.8602	33.6583	33.6617		34.7362	5	34.8263	34.7706	34.7553		35.1647	4
34.3378	5	34.0209	34.0823	34.0806		34.8575	5	34.6866	34.7701	34.8485		32.3255	6	32.2196	32.0697	32.0835		34.6224	5	34.2714	34.2478	34.3169		32.5583	5	32.7012	32.8885	32.7502		35.0296	4	34.7816	35.2134	35.1889		33.6108	6	33.8705	33.6707	33.6744		34.7347	5	34.8225	34.7663	34.7511		35.1794	4
34.3365	5	34.0185	34.0806	34.0793		34.8606	6	34.6942	34.7791	34.8563		32.3358	6	32.2263	32.0778	32.0902		34.6044	5	34.266	34.2418	34.3113		32.554	5	32.6964	32.8846	32.7466		34.9931	4	34.7877	35.2206	35.1954		33.6253	6	33.8808	33.683	33.687		34.7481	5	34.8186	34.7621	34.747		35.1812	4
34.3328	5	34.0161	34.0789	34.078		34.8618	6	34.7018	34.7881	34.864		32.3553	6	32.233	32.0858	32.0968		34.5882	5	34.2607	34.2359	34.3058		32.553	5	32.6917	32.8807	32.743		34.9578	4	34.7938	35.2277	35.2018		33.6538	6	33.891	33.6953	33.6995		34.7578	5	34.8148	34.7579	34.7429		35.1739	4
34.3322	5	34.0137	34.0772	34.0767		34.8771	6	34.7094	34.797	34.8717		32.3788	6	32.2397	32.0938	32.1034		34.5738	5	34.2554	34.23	34.3003		32.5516	5	32.687	32.8769	32.7394		34.9296	5	34.7898	35.2202	35.1933		33.6972	6	33.9011	33.7075	33.712		34.7566	5	34.811	34.7537	34.7388		35.1677	4
34.3334	5	34.0114	34.0755	34.0755		34.9047	6	34.7169	34.8059	34.8794		32.4147	6	32.2463	32.1018	32.1099		34.5639	5	34.2501	34.2242	34.2949		32.5529	5	32.6823	32.873	32.7358		34.9041	5	34.7857	35.2127	35.1849		33.7352	6	33.9112	33.7196	33.7243		34.7647	5	34.8072	34.7496	34.7347		35.1634	4
34.3391	5	34.009	34.0738	34.0742		34.9484	6	34.7244	34.8147	34.887		32.4644	6	32.2529	32.1097	32.1164		34.5572	4	34.2595	34.2341	34.3035		32.5505	5	32.6777	32.8693	32.7323		34.8862	5	34.7816	35.2052	35.1765		33.7779	6	33.9213	33.7316	33.7366		34.7579	4	34.813	34.7583	34.7429		35.1564	4
34.3476	5	34.0067	34.0721	34.073		34.988	4	34.7319	34.8234	34.8946		32.5198	6	32.2595	32.1175	32.1229		34.5519	5	34.2542	34.2282	34.298		32.5463	5	32.6731	32.8655	32.7288		34.8703	5	34.7776	35.1978	35.1681		33.825	6	33.9314	33.7436	33.7488		34.7463	5	34.8092	34.7541	34.7389		35.1523	4
34.3484	5	34.0043	34.0705	34.0718		34.9856	4	34.7394	34.8322	34.9021		32.564	6	32.2661	32.1253	32.1294		34.5437	5	34.2489	34.2224	34.2926		32.5382	5	32.6685	32.8618	32.7254		34.8613	5	34.7735	35.1903	35.1599		33.8677	6	33.9414	33.7555	33.7609		34.7338	5	34.8054	34.75	34.7348		35.1544	4
34.3505	5	34.002	34.0689	34.0706		34.9589	4	34.7468	34.8408	34.9096		32.592	6	32.2727	32.133	32.1358		34.5506	5	34.2437	34.2167	34.2873		32.5251	5	32.664	32.8582	32.722		34.861	5	34.7695	35.1829	35.1516		33.9087	6	33.9514	33.7673	33.7729		34.7253	5	34.8016	34.7458	34.7308		35.1642	4
34.3537	6	34.0095	34.0774	34.0783		34.9311	4	34.7543	34.8495	34.9171		32.612	6	32.2792	32.1407	32.1421		34.5512	5	34.2386	34.211	34.282		32.5168	5	32.6594	32.8545	32.7186		34.8564	5	34.7654	35.1755	35.1434		33.9481	4	33.9613	33.779	33.7849		34.7158	4	34.8075	34.7546	34.739		35.1758	4
34.3609	6	34.0169	34.0859	34.0859		34.9077	4	34.7617	34.8581	34.9245		32.6315	6	32.2857	32.1483	32.1485		34.5518	5	34.2334	34.2053	34.2768		32.5118	5	32.6549	32.8509	32.7152		34.8403	5	34.7614	35.168	35.1353		33.9798	4	33.9712	33.7907	33.7967		34.7036	5	34.8037	34.7505	34.735		35.1756	4
34.3806	4	34.0243	34.0943	34.0935		34.8809	4	34.769	34.8666	34.9319		32.6565	6	32.2922	32.1559	32.1548		34.5508	5	34.2283	34.1997	34.2716		32.5106	5	32.6505	32.8474	32.7119		34.8247	5	34.7573	35.1607	35.1272		33.9701	4	33.981	33.8022	33.8085		34.703	5	34.7999	34.7463	34.731		35.1697	4
34.3973	4	34.0317	34.1026	34.1011		34.8558	4	34.7764	34.8751	34.9393		32.6729	6	32.2987	32.1634	32.161		34.5398	4	34.2377	34.2097	34.2803		32.5054	5	32.6461	32.8438	32.7086		34.8161	5	34.7533	35.1533	35.1191		33.9452	4	33.9908	33.8137	33.8202		34.7104	5	34.7961	34.7422	34.727		35.1639	4
34.3891	4	34.039	34.1109	34.1086		34.8327	5	34.7721	34.8708	34.9353		32.6851	6	32.3051	32.1709	32.1672		34.5295	5	34.2326	34.2041	34.2751		32.501	5	32.6416	32.8403	32.7054		34.8196	5	34.7493	35.1459	35.1111		33.9153	5	33.9887	33.8111	33.8174		34.7225	5	34.7924	34.7381	34.7231		35.1528	4
34.3792	4	34.0464	34.1192	34.1161		34.8185	5	34.7679	34.8665	34.9313		32.6956	6	32.3115	32.1783	32.1734		34.5169	5	34.2275	34.1985	34.27		32.4954	5	32.6373	32.8369	32.7022		34.8241	5	34.7453	35.1386	35.1032		33.8812	5	33.9865	33.8085	33.8146		34.7241	5	34.7886	34.7341	34.7191		35.1374	4
34.3675	5	34.0438	34.1168	34.1142		34.815	4	34.7753	34.875	34.9387		32.7102	6	32.3179	32.1857	32.1796		34.4966	5	34.2224	34.193	34.2649		32.4933	5	32.6329	32.8334	32.699		34.8177	5	34.7413	35.1312	35.0953		33.8526	5	33.9844	33.8059	33.8119		34.737	5	34.7849	34.73	34.7152		35.1265	4
34.3549	5	34.0413	34.1144	34.1122		34.8178	5	34.771	34.8707	34.9347		32.7264	6	32.3243	32.193	32.1857		34.481	5	34.2174	34.1875	34.2599		32.4895	5	32.6286	32.83	32.6958		34.8226	5	34.7373	35.1239	35.0874		33.8272	5	33.9822	33.8034	33.8091		34.7427	5	34.7811	34.726	34.7114		35.1268	4
34.3533	5	34.0388	34.1121	34.1103		34.8109	5	34.7668	34.8665	34.9307		32.724	6	32.3307	32.2003	32.1918		34.4712	5	34.2124	34.182	34.2549		32.4862	5	32.6243	32.8266	32.6927		34.8206	5	34.7333	35.1166	35.0797		33.8059	4	33.992	33.8148	33.8208		34.7474	5	34.7774	34.722	34.7075		35.128	4
34.3529	5	34.0363	34.1098	34.1084		34.8104	5	34.7626	34.8623	34.9267		32.7282	6	32.337	32.2075	32.1978		34.4752	5	34.2075	34.1767	34.25		32.488	5	32.62	32.8233	32.6896		34.8114	5	34.7293	35.1093	35.0719		33.7958	4	34.0018	33.8263	33.8324		34.7545	5	34.7737	34.718	34.7037		35.112	5
34.3565	5	34.0338	34.1076	34.1066		34.8124	5	34.7584	34.8581	34.9228		32.7334	6	32.3433	32.2147	32.2039		34.4694	5	34.2026	34.1713	34.2451		32.4894	5	32.6158	32.82	32.6865		34.8026	5	34.7253	35.102	35.0642		33.7924	4	34.0115	33.8376	33.844		34.7505	5	34.77	34.7141	34.6999		35.0855	5
34.3535	5	34.0313	34.1053	34.1048		34.8121	5	34.7542	34.8539	34.919		32.7367	6	32.3496	32.2219	32.2098		34.4593	5	34.1977	34.166	34.2403		32.4875	5	32.6116	32.8167	32.6835		34.7933	5	34.7213	35.0948	35.0566		33.7868	4	34.0212	33.8489	33.8554		34.7397	5	34.7663	34.7102	34.6962		35.0638	5
34.3443	5	34.0288	34.1031	34.103		34.8144	5	34.7501	34.8498	34.9151		32.7398	6	32.3559	32.229	32.2158		34.456	5	34.1928	34.1608	34.2355		32.4824	5	32.6074	32.8134	32.6805		34.796	5	34.7173	35.0875	35.049		33.7869	4	34.0309	33.8601	33.8668		34.7389	5	34.7626	34.7063	34.6924		35.0385	5
34.3405	4	34.0362	34.1114	34.1105		34.8135	5	34.746	34.8457	34.9114		32.7499	6	32.3621	32.236	32.2217		34.4516	5	34.188	34.1556	34.2308		32.4799	5	32.6032	32.8102	32.6775		34.8018	5	34.7134	35.0803	35.0415		33.7879	4	34.0405	33.8713	33.8781		34.7401	5	34.7589	34.7024	34.6887		35.0156	5
34.3412	5	34.0337	34.1091	34.1086		34.8088	5	34.7418	34.8416	34.9076		32.7518	6	32.3684	32.243	32.2276		34.4568	5	34.1832	34.1504	34.2261		32.4764	5	32.5991	32.8069	32.6746		34.805	5	34.7094	35.0731	35.034		33.7833	4	34.0501	33.8823	33.8894		34.7387	5	34.7553	34.6985	34.685		34.9921	5
34.33	5	34.0312	34.1068	34.1068		34.8054	5	34.7377	34.8376	34.9039		32.7581	4	32.3746	32.25	32.2334		34.4461	5	34.1785	34.1453	34.2214		32.4707	5	32.595	32.8037	32.6717		34.8044	5	34.7054	35.0659	35.0266		33.787	4	34.0596	33.8933	33.9005		34.7336	5	34.7516	34.6947	34.6814		34.9749	5
34.3363	5	34.0288	34.1046	34.105		34.8012	5	34.7337	34.8336	34.9003		32.7499	4	32.3808	32.2569	32.2392		34.4513	5	34.1737	34.1402	34.2168		32.4622	5	32.5909	32.8005	32.6688		34.8004	5	34.7015	35.0587	35.0192		33.7953	4	34.0692	33.9043	33.9116		34.7339	5	34.748	34.6909	34.6778		34.9666	5
34.3389	5	34.0263	34.1024	34.1032		34.7982	5	34.7296	34.8296	34.8966		32.7117	4	32.3869	32.2638	32.245		34.4455	5	34.1691	34.1352	34.2122		32.4605	5	32.5869	32.7974	32.6659		34.8013	5	34.6975	35.0515	35.0119		33.8002	4	34.0786	33.9151	33.9226		34.7294	5	34.7443	34.6871	34.6742		34.9561	5
34.3396	5	34.0239	34.1002	34.1015		34.7899	5	34.7256	34.8257	34.893		32.6783	4	32.3931	32.2706	32.2507		34.4408	5	34.1644	34.1302	34.2076		32.4619	5	32.5828	32.7942	32.6631		34.8102	5	34.6936	35.0443	35.0046		33.8067	4	34.0881	33.9259	33.9335		34.7235	5	34.7407	34.6833	34.6706		34.9459	5
34.3402	5	34.0215	34.0981	34.0997		34.7814	5	34.7215	34.8218	34.8895		32.6403	5	32.3887	32.2655	32.2454		34.4432	5	34.1598	34.1253	34.2031		32.4651	5	32.5788	32.7911	32.6603		34.8139	5	34.6896	35.0372	34.9974		33.8126	4	34.0975	33.9367	33.9444		34.7185	5	34.7371	34.6796	34.6671		34.9312	5
34.3404	5	34.0191	34.0959	34.0981		34.78	5	34.7175	34.8179	34.886		32.602	5	32.3844	32.2603	32.2401		34.4465	5	34.1552	34.1204	34.1986		32.4722	5	32.5749	32.788	32.6575		34.8117	5	34.6857	35.0301	34.9902		33.8202	4	34.1068	33.9473	33.9552		34.7175	5	34.7335	34.6759	34.6635		34.924	4
34.3315	5	34.0167	34.0938	34.0964		34.7801	5	34.7135	34.814	34.8825		32.5699	5	32.3801	32.2552	32.2349		34.4423	5	34.1506	34.1155	34.1942		32.4803	5	32.5709	32.7849	32.6548		34.8154	5	34.6818	35.0229	34.983		33.8271	4	34.1161	33.9579	33.9659		34.7085	5	34.7299	34.6722	34.6601		34.9098	5
34.3297	5	34.0143	34.0918	34.0948		34.7905	5	34.7095	34.8102	34.879		32.5479	5	32.3758	32.2502	32.2298		34.4447	5	34.1461	34.1107	34.1898		32.4798	5	32.567	32.7818	32.652		34.8187	5	34.6779	35.0158	34.9759		33.8325	4	34.1254	33.9684	33.9765		34.712	5	34.7263	34.6685	34.6566		34.8951	5
34.3297	5	34.0119	34.0897	34.0932		34.7966	5	34.7056	34.8064	34.8756		32.5345	5	32.3715	32.2452	32.2247		34.4472	5	34.1416	34.106	34.1854		32.4808	4	32.5756	32.7905	32.6597		34.8077	5	34.6739	35.0087	34.9688		33.8397	4	34.1347	33.9789	33.987		34.7173	5	34.7227	34.6649	34.6532		34.8857	5
34.3243	5	34.0095	34.0877	34.0916		34.7929	5	34.7016	34.8026	34.8722		32.5232	4	32.3777	32.2522	32.2305		34.4441	5	34.1371	34.1012	34.1811		32.4727	4	32.5842	32.7991	32.6672		34.8029	5	34.67	35.0017	34.9618		33.8498	4	34.1439	33.9893	33.9975		34.7183	4	34.7288	34.6743	34.6619		34.8787	5
34.327	5	34.0072	34.0857	34.0901		34.7822	5	34.6977	34.7988	34.8688		32.5133	5	32.3734	32.2472	32.2254		34.4478	5	34.1327	34.0966	34.1769		32.4594	5	32.5802	32.7958	32.6644		34.8025	5	34.6661	34.9946	34.9548		33.8645	4	34.1531	33.9996	34.0079		34.7023	5	34.7252	34.6706	34.6585		34.8675	5
34.332	5	34.0049	34.0838	34.0886		34.7803	5	34.6938	34.7951	34.8655		32.5027	5	32.3691	32.2422	32.2204		34.4422	5	34.1283	34.0919	34.1726		32.4603	5	32.5762	32.7926	32.6616		34.8059	5	34.6622	34.9875	34.9479		33.8806	4	34.1622	34.0099	34.0183		34.6901	5	34.7216	34.667	34.655		34.8615	5
34.3325	5	34.0025	34.0818	34.087		34.7785	5	34.6899	34.7914	34.8622		32.4922	5	32.3649	32.2373	32.2154		34.4339	5	34.1239	34.0873	34.1685		32.4637	5	32.5723	32.7895	32.6588		34.8098	5	34.6583	34.9805	34.941		33.8943	4	34.1713	34.0201	34.0285		34.6899	5	34.718	34.6633	34.6516		34.8579	5
34.3239	4	34.01	34.0902	34.0946		34.7755	5	34.686	34.7877	34.8589		32.4897	5	32.3607	32.2324	32.2105		34.4341	5	34.1196	34.0828	34.1643		32.4649	5	32.5683	32.7863	32.656		34.8174	5	34.6544	34.9735	34.9342		33.9018	4	34.1804	34.0302	34.0387		34.6958	5	34.7145	34.6597	34.6482		34.8555	5
34.3116	4	34.0174	34.0986	34.1022		34.7714	5	34.6821	34.7841	34.8557		32.4821	5	32.3565	32.2275	32.2056		34.4359	6	34.1294	34.0934	34.1736		32.4657	5	32.5644	32.7831	32.6533		34.8291	5	34.6505	34.9665	34.9274		33.9172	4	34.1895	34.0403	34.0489		34.6941	5	34.7109	34.6561	34.6448		34.8512	5
34.307	5	34.015	34.0964	34.1004		34.7776	5	34.6783	34.7805	34.8525		32.4623	5	32.3523	32.2227	32.2008		34.4414	6	34.1392	34.1039	34.1828		32.4671	5	32.5606	32.78	32.6505		34.8357	5	34.6467	34.9595	34.9206		33.9315	4	34.1985	34.0503	34.0589		34.6952	5	34.7074	34.6526	34.6415		34.839	5
34.3114	5	34.0127	34.0943	34.0987		34.7853	4	34.6859	34.7895	34.8602		32.4546	5	32.3481	32.218	32.196		34.46	6	34.1489	34.1144	34.1919		32.4689	5	32.5567	32.7769	32.6479		34.8469	5	34.6428	34.9525	34.9139		33.9411	4	34.2074	34.0603	34.0689		34.695	5	34.7038	34.649	34.6382		34.8301	4
34.3187	5	34.0103	34.0921	34.097		34.7805	4	34.6936	34.7984	34.8678		32.4488	5	32.344	32.2133	32.1914		34.4703	6	34.1587	34.1249	34.201		32.4766	5	32.5529	32.7738	32.6452		34.8498	5	34.6389	34.9455	34.9072		33.9407	4	34.2164	34.0702	34.0788		34.693	5	34.7003	34.6455	34.6349		34.8222	5
34.3224	5	34.0079	34.0901	34.0954		34.7599	4	34.7011	34.8072	34.8755		32.4398	5	32.3399	32.2086	32.1867		34.4794	6	34.1683	34.1353	34.2101		32.4823	5	32.549	32.7708	32.6426		34.8371	4	34.6455	34.9561	34.9166		33.9339	4	34.2253	34.08	34.0887		34.6805	4	34.7064	34.6551	34.6438		34.8038	5
34.3303	4	34.0154	34.0984	34.1029		34.7471	4	34.7087	34.816	34.883		32.4298	5	32.3358	32.204	32.1822		34.4975	6	34.178	34.1456	34.2191		32.4814	5	32.5453	32.7677	32.64		34.8481	4	34.652	34.9665	34.9258		33.9246	4	34.2341	34.0898	34.0984		34.6625	5	34.7029	34.6515	34.6405		34.8013	5
34.3215	4	34.0228	34.1067	34.1104		34.7414	4	34.7162	34.8247	34.8906		32.4235	5	32.3317	32.1994	32.1776		34.5149	6	34.1876	34.1559	34.228		32.4838	5	32.5415	32.7647	32.6374		34.8587	4	34.6585	34.9767	34.935		33.9164	5	34.2303	34.0851	34.0934		34.6539	5	34.6994	34.648	34.6372		34.8089	5
34.3221	5	34.0204	34.1044	34.1085		34.7393	4	34.7238	34.8334	34.8981		32.4201	5	32.3276	32.1948	32.1732		34.546	6	34.1971	34.1661	34.237		32.4789	5	32.5378	32.7617	32.6348		34.8568	4	34.665	34.9868	34.944		33.9053	5	34.2266	34.0804	34.0883		34.6578	5	34.6959	34.6445	34.6339		34.8088	5
34.323	5	34.018	34.1021	34.1066		34.7356	4	34.7313	34.842	34.9055		32.4179	5	32.3236	32.1903	32.1688		34.575	6	34.2067	34.1763	34.2458		32.474	5	32.534	32.7587	32.6323		34.8632	4	34.6715	34.9967	34.953		33.8963	5	34.2229	34.0757	34.0833		34.6552	5	34.6924	34.641	34.6307		34.8115	5
34.3232	5	34.0156	34.0998	34.1047		34.7366	4	34.7387	34.8505	34.913		32.4177	5	32.3196	32.1859	32.1644		34.6008	6	34.2161	34.1864	34.2547		32.4687	5	32.5303	32.7557	32.6298		34.8701	4	34.678	35.0065	34.9619		33.8906	5	34.2192	34.0712	34.0784		34.6451	5	34.6889	34.6375	34.6274		34.8128	5
34.3239	5	34.0132	34.0975	34.1029		34.7373	4	34.7462	34.859	34.9204		32.4202	5	32.3155	32.1814	32.1601		34.6247	6	34.2256	34.1965	34.2635		32.4706	5	32.5267	32.7528	32.6273		34.8718	5	34.674	34.9994	34.9549		33.8941	4	34.2281	34.081	34.0882		34.6445	5	34.6854	34.6341	34.6242		34.8069	5
34.3246	5	34.0108	34.0953	34.1011		34.735	4	34.7536	34.8675	34.9277		32.4217	5	32.3116	32.1771	32.1559		34.6503	6	34.235	34.2065	34.2722		32.4724	5	32.523	32.7499	32.6248		34.8752	5	34.6701	34.9923	34.948		33.8984	5	34.2243	34.0763	34.0832		34.6419	5	34.6819	34.6306	34.6211		34.7986	5
34.3186	5	34.0085	34.0931	34.0993		34.7342	4	34.761	34.8759	34.935		32.4098	4	32.318	32.1845	32.162		34.6744	6	34.2444	34.2165	34.2809		32.4743	5	32.5194	32.7469	32.6224		34.8854	5	34.6662	34.9852	34.9411		33.8974	5	34.2206	34.0717	34.0783		34.6528	5	34.6784	34.6272	34.6179		34.7873	5
34.3229	5	34.0061	34.091	34.0975		34.738	5	34.7568	34.8715	34.9309		32.3973	5	32.314	32.1801	32.1578		34.6781	4	34.2537	34.2265	34.2896		32.4788	5	32.5158	32.7441	32.62		34.9045	5	34.6623	34.9782	34.9343		33.8974	5	34.2169	34.0672	34.0734		34.6563	4	34.6846	34.6369	34.627		34.7816	5
34.3229	5	34.0038	34.0888	34.0958		34.7382	5	34.7526	34.8671	34.9268		32.3934	5	32.31	32.1758	32.1535		34.6617	4	34.2631	34.2363	34.2982		32.4833	5	32.5122	32.7412	32.6176		34.9108	5	34.6584	34.9711	34.9274		33.8997	5	34.2133	34.0627	34.0685		34.6491	5	34.6812	34.6335	34.6238		34.771	5
34.3214	5	34.0015	34.0867	34.094		34.7503	5	34.7485	34.8628	34.9228		32.3914	5	32.306	32.1714	32.1494		34.6233	4	34.2723	34.2462	34.3068		32.4834	4	32.5211	32.7499	32.6254		34.9248	5	34.6545	34.9641	34.9207		33.9007	4	34.2222	34.0725	34.0784		34.6313	5	34.6777	34.63	34.6206		34.7537	5
34.3142	5	33.9992	34.0847	34.0923		34.7602	5	34.7444	34.8585	34.9188		32.3911	5	32.3021	32.1672	32.1453		34.5839	4	34.2816	34.2559	34.3154		32.4761	5	32.5175	32.747	32.623		34.9245	5	34.6506	34.957	34.914		33.903	5	34.2185	34.068	34.0735		34.6253	5	34.6742	34.6266	34.6175		34.7449	5
34.308	6	34.0067	34.093	34.0999		34.7616	5	34.7403	34.8542	34.9149		32.3926	5	32.2982	32.1629	32.1412		34.5522	4	34.2908	34.2657	34.3239		32.4721	5	32.5139	32.744	32.6206		34.928	5	34.6468	34.95	34.9073		33.9032	5	34.2148	34.0635	34.0686		34.6205	5	34.6708	34.6232	34.6144		34.7437	5
34.3267	6	34.0141	34.1013	34.1074		34.7633	5	34.7362	34.85	34.911		32.4017	5	32.2943	32.1587	32.1372		34.5307	4	34.2999	34.2753	34.3323		32.4684	5	32.5103	32.7411	32.6183		34.9315	5	34.6429	34.943	34.9006		33.906	5	34.2111	34.059	34.0637		34.618	5	34.6673	34.6199	34.6113		34.7416	5
34.338	6	34.0215	34.1095	34.1148		34.7649	5	34.7321	34.8458	34.9071		32.4082	5	32.2904	32.1546	32.1333		34.5169	4	34.3091	34.285	34.3407		32.4683	5	32.5068	32.7382	32.6159		34.9214	5	34.639	34.936	34.894		33.9097	5	34.2075	34.0545	34.0589		34.6184	5	34.6639	34.6165	34.6082		34.7413	5
34.3524	6	34.0289	34.1177	34.1222		34.772	5	34.728	34.8416	34.9032		32.4071	5	32.2865	32.1504	32.1294		34.5002	4	34.3182	34.2946	34.3491		32.4664	5	32.5033	32.7354	32.6136		34.9192	5	34.6351	34.9291	34.8874		33.907	5	34.2039	34.0501	34.0541		34.617	5	34.6605	34.6132	34.6051		34.7406	5
34.3793	6	34.0363	34.1259	34.1296		34.7778	5	34.724	34.8375	34.8994		32.4129	5	32.2827	32.1463	32.1255		34.4982	4	34.3272	34.3041	34.3575		32.4683	5	32.4998	32.7325	32.6114		34.9165	5	34.6313	34.9221	34.8809		33.9076	5	34.2003	34.0457	34.0494		34.6151	5	34.6571	34.6099	34.6021		34.7329	5
34.4162	6	34.0436	34.1339	34.1369		34.7865	5	34.72	34.8334	34.8957		32.4189	4	32.2892	32.154	32.1318		34.4834	4	34.3363	34.3136	34.3657		32.4783	5	32.4963	32.7297	32.6092		34.9098	5	34.6274	34.9152	34.8744		33.912	5	34.1968	34.0413	34.0447		34.6147	5	34.6537	34.6066	34.5991		34.7249	5
34.4568	6	34.0509	34.142	34.1442		34.7874	5	34.716	34.8293	34.892		32.4036	5	32.2853	32.1499	32.1279		34.4853	4	34.3453	34.323	34.374		32.4806	5	32.4928	32.7268	32.607		34.91	5	34.6236	34.9083	34.868		33.9176	4	34.2058	34.0513	34.0547		34.6161	5	34.6503	34.6033	34.5961		34.7197	4
34.4904	6	34.0582	34.15	34.1514		34.7702	5	34.712	34.8253	34.8883		32.3855	5	32.2815	32.1459	32.124		34.4733	4	34.3542	34.3324	34.3822		32.4878	5	32.4894	32.724	32.6048		34.9041	5	34.6197	34.9014	34.8616		33.9152	5	34.2022	34.0469	34.05		34.6146	5	34.6469	34.6	34.5932		34.7146	4
34.5234	6	34.0655	34.1579	34.1587		34.7525	5	34.708	34.8213	34.8847		32.376	5	32.2777	32.1418	32.1202		34.4778	4	34.3631	34.3417	34.3904		32.4976	5	32.486	32.7212	32.6027		34.9049	5	34.6159	34.8945	34.8552		33.9243	5	34.1986	34.0425	34.0453		34.6117	5	34.6435	34.5968	34.5902		34.7109	5
34.5504	6	34.0727	34.1658	34.1658		34.743	5	34.7041	34.8173	34.8811		32.3814	5	32.2739	32.1378	32.1164		34.4796	4	34.372	34.351	34.3985		32.504	5	32.4826	32.7185	32.6006		34.9105	5	34.6121	34.8876	34.8489		33.9406	5	34.1951	34.0382	34.0406		34.6151	5	34.6401	34.5936	34.5873		34.6962	4
34.5789	6	34.08	34.1736	34.173		34.7396	5	34.7001	34.8133	34.8776		32.3749	5	32.2701	32.1338	32.1127		34.4804	4	34.3809	34.3603	34.4066		32.5095	5	32.4793	32.7157	32.5985		34.9227	5	34.6082	34.8807	34.8426		33.9461	5	34.1915	34.0339	34.036		34.6042	5	34.6368	34.5904	34.5844		34.6955	4
34.5978	6	34.0871	34.1814	34.1801		34.734	5	34.6962	34.8094	34.8741		32.3735	5	32.2663	32.1299	32.109		34.4764	4	34.3897	34.3695	34.4146		32.5171	4	32.4882	32.7245	32.6064		34.9298	5	34.6044	34.8739	34.8363		33.9476	5	34.188	34.0296	34.0314		34.5873	5	34.6334	34.5872	34.5815		34.7111	4
34.6078	6	34.0943	34.1892	34.1871		34.7343	5	34.6923	34.8055	34.8706		32.3743	5	32.2626	32.126	32.1054		34.4827	4	34.3985	34.3786	34.4226		32.5161	4	32.4971	32.7333	32.6143		34.9355	5	34.6006	34.867	34.8301		33.9524	5	34.1846	34.0254	34.0268		34.5772	5	34.6301	34.584	34.5787		34.7145	5
34.6153	6	34.1015	34.1969	34.1941		34.7371	5	34.6884	34.8016	34.8672		32.3739	5	32.2589	32.1221	32.1018		34.4986	4	34.4072	34.3877	34.4306		32.5074	5	32.4937	32.7304	32.6122		34.9407	5	34.5968	34.8602	34.8239		33.9523	4	34.1936	34.0355	34.037		34.5717	5	34.6267	34.5809	34.5759		34.7079	5
34.6251	6	34.1086	34.2045	34.2011		34.7403	5	34.6845	34.7978	34.8638		32.3683	5	32.2552	32.1182	32.0982		34.4989	4	34.416	34.3968	34.4385		32.5021	5	32.4903	32.7275	32.61		34.9493	5	34.593	34.8534	34.8178		33.9496	5	34.1901	34.0312	34.0323		34.5736	5	34.6234	34.5778	34.5731		34.7044	5
34.6386	6	34.1157	34.2122	34.2081		34.7478	5	34.6807	34.7939	34.8604		32.3685	5	32.2515	32.1144	32.0947		34.4952	4	34.4247	34.4058	34.4463		32.4991	5	32.4868	32.7246	32.6079		34.9513	5	34.5892	34.8466	34.8117		33.9408	5	34.1866	34.027	34.0277		34.5749	5	34.6201	34.5746	34.5703		34.6987	5
34.6487	6	34.1227	34.2197	34.215		34.7457	5	34.6768	34.7901	34.8571		32.3689	5	32.2478	32.1106	32.0913		34.4938	4	34.4333	34.4148	34.4542		32.4968	5	32.4834	32.7217	32.6058		34.9601	5	34.5854	34.8398	34.8056		33.9333	5	34.1831	34.0228	34.0232		34.5755	6	34.6265	34.5847	34.5797		34.6967	5
34.6651	6	34.1298	34.2273	34.2218		34.7344	5	34.673	34.7863	34.8538		32.3688	5	32.2441	32.1068	32.0878		34.5024	4	34.4419	34.4237	34.462		32.4953	5	32.4801	32.7189	32.6037		34.9744	4	34.5921	34.8515	34.8159		33.93	5	34.1797	34.0186	34.0187		34.5765	6	34.6328	34.5947	34.589		34.6988	5
34.6587	6	34.1368	34.2347	34.2287		34.7265	5	34.6692	34.7826	34.8506		32.3724	5	32.2405	32.1031	32.0845		34.515	4	34.4505	34.4326	34.4697		32.4963	5	32.4767	32.716	32.6017		34.9691	4	34.5988	34.8631	34.826		33.929	5	34.1763	34.0144	34.0142		34.5747	6	34.6391	34.6046	34.5983		34.6976	5
34.6658	6	34.1438	34.2422	34.2355		34.7236	5	34.6654	34.7789	34.8474		32.3762	5	32.2369	32.0993	32.0811		34.5221	4	34.4591	34.4414	34.4775		32.5012	5	32.4734	32.7132	32.5997		34.9609	5	34.595	34.8563	34.8198		33.9337	5	34.1729	34.0103	34.0098		34.5742	6	34.6455	34.6144	34.6075		34.692	5
34.6804	6	34.1508	34.2496	34.2422		34.7246	5	34.6616	34.7752	34.8442		32.3667	4	32.2435	32.1073	32.0876		34.5158	4	34.4676	34.4502	34.4851		32.4967	5	32.4701	32.7105	32.5977		34.963	5	34.5912	34.8495	34.8137		33.9317	5	34.1695	34.0063	34.0053		34.5724	4	34.6518	34.6242	34.6167		34.685	5
34.6827	6	34.1577	34.2569	34.249		34.7264	5	34.6579	34.7715	34.841		32.3653	5	32.2399	32.1036	32.0842		34.523	4	34.4761	34.4589	34.4928		32.4959	5	32.4668	32.7077	32.5958		34.9686	5	34.5874	34.8427	34.8076		33.9332	5	34.1662	34.0022	34.001		34.5554	5	34.6484	34.6208	34.6136		34.6789	5
34.6871	6	34.1647	34.2642	34.2556		34.7142	5	34.6541	34.7679	34.8379		32.3599	5	32.2363	32.0998	32.0809		34.5463	4	34.4845	34.4676	34.5004		32.4965	5	32.4635	32.7049	32.5939		34.9649	5	34.5836	34.8359	34.8016		33.9337	5	34.1628	33.9982	33.9966		34.5463	5	34.645	34.6175	34.6106		34.6732	5
34.6855	6	34.1716	34.2715	34.2623		34.702	5	34.6504	34.7643	34.8348		32.3586	5	32.2327	32.0962	32.0777		34.5559	4	34.493	34.4763	34.5079		32.4953	5	32.4603	32.7022	32.592		34.9644	5	34.5798	34.8291	34.7956		33.9314	5	34.1595	33.9942	33.9923		34.55	5	34.6416	34.6142	34.6075		34.661	5
34.6884	6	34.1785	34.2787	34.2689		34.6878	5	34.6467	34.7607	34.8318		32.3598	5	32.2291	32.0925	32.0744		34.5708	4	34.5013	34.4849	34.5155		32.4953	5	32.4571	32.6995	32.5901		34.9668	5	34.576	34.8223	34.7896		33.9289	5	34.1562	33.9903	33.988		34.5493	5	34.6382	34.6108	34.6045		34.6509	5
34.7031	6	34.1853	34.2858	34.2755		34.6838	5	34.643	34.7571	34.8287		32.3615	4	32.2358	32.1005	32.0809		34.5779	4	34.5097	34.4934	34.5229		32.5006	5	32.4539	32.6968	32.5883		34.9817	5	34.5722	34.8156	34.7837		33.9276	5	34.153	33.9864	33.9838		34.5466	4	34.6446	34.6206	34.6137		34.6381	5
34.6915	6	34.1921	34.293	34.282		34.6865	5	34.6393	34.7536	34.8257		32.3707	5	32.2322	32.0969	32.0777		34.5982	4	34.518	34.5019	34.5304		32.5052	5	32.4507	32.6941	32.5865		34.9865	5	34.5685	34.8089	34.7778		33.9243	5	34.1497	33.9825	33.9796		34.5412	5	34.6412	34.6173	34.6107		34.6321	5
34.6976	6	34.199	34.3001	34.2885		34.6929	5	34.6357	34.7501	34.8228		32.3757	5	32.2286	32.0932	32.0745		34.6171	4	34.5263	34.5104	34.5378		32.5019	5	32.4475	32.6914	32.5847		34.9898	5	34.5647	34.8022	34.7719		33.9214	5	34.1465	33.9786	33.9754		34.5364	5	34.6378	34.6139	34.6077		34.6194	5
34.7093	6	34.2057	34.3071	34.295		34.7043	5	34.632	34.7467	34.8199		32.3765	4	32.2353	32.1013	32.081		34.6327	4	34.5346	34.5188	34.5452		32.4963	5	32.4444	32.6887	32.5829		34.9904	5	34.5609	34.7955	34.7661		33.9201	5	34.1433	33.9748	33.9712		34.5333	4	34.6441	34.6237	34.6168		34.6112	5
34.7032	6	34.2125	34.3141	34.3014		34.7144	5	34.6284	34.7433	34.817		32.3842	5	32.2317	32.0976	32.0778		34.6459	4	34.5428	34.5272	34.5525		32.4922	5	32.4413	32.6861	32.5812		34.9888	5	34.5572	34.7888	34.7603		33.9212	5	34.1401	33.971	33.9671		34.5335	5	34.6408	34.6204	34.6138		34.6013	5
34.708	6	34.2192	34.321	34.3078		34.726	6	34.6362	34.7523	34.8248		32.3925	5	32.2281	32.0939	32.0746		34.659	4	34.551	34.5356	34.5598		32.4867	5	32.4382	32.6835	32.5795		34.9898	5	34.5534	34.7821	34.7546		33.9174	5	34.137	33.9673	33.963		34.5181	4	34.6471	34.6301	34.6229		34.5956	5
34.7069	6	34.226	34.328	34.3142		34.7387	6	34.6439	34.7614	34.8326		32.3929	5	32.2246	32.0903	32.0714		34.6802	4	34.5592	34.5439	34.5671		32.4776	5	32.4351	32.6809	32.5778		34.9929	5	34.5497	34.7755	34.7489		33.9092	5	34.1338	33.9635	33.9589		34.5154	5	34.6437	34.6267	34.6198		34.5925	5
34.713	6	34.2327	34.3348	34.3205		34.7669	6	34.6517	34.7703	34.8403		32.3818	5	32.221	32.0867	32.0684		34.6792	4	34.5673	34.5521	34.5743		32.474	5	32.432	32.6783	32.5762		34.9906	4	34.5565	34.788	34.7598		33.9028	5	34.1307	33.9598	33.9549		34.5152	5	34.6403	34.6233	34.6167		34.5924	5
34.7115	6	34.2393	34.3417	34.3268		34.8042	6	34.6594	34.7792	34.848		32.3729	5	32.2175	32.0832	32.0653		34.6865	4	34.5754	34.5603	34.5815		32.4708	5	32.429	32.6757	32.5746		34.9757	5	34.5528	34.7814	34.7541		33.8957	5	34.1276	33.9562	33.9509		34.5202	5	34.637	34.6199	34.6137		34.5796	4
34.7116	6	34.246	34.3485	34.3331		34.8421	6	34.6671	34.7881	34.8557		32.3613	5	32.214	32.0797	32.0623		34.6857	4	34.5835	34.5685	34.5886		32.4712	5	32.426	32.6731	32.573		34.9561	5	34.549	34.7747	34.7484		33.8888	5	34.1245	33.9525	33.9469		34.5256	5	34.6336	34.6166	34.6106		34.5612	5
34.7076	6	34.2526	34.3552	34.3393		34.8881	6	34.6748	34.7969	34.8634		32.3605	5	32.2105	32.0762	32.0594		34.6984	4	34.5915	34.5766	34.5957		32.4697	5	32.423	32.6706	32.5714		34.9427	5	34.5453	34.7681	34.7428		33.8876	5	34.1215	33.9489	33.943		34.5328	5	34.6303	34.6132	34.6076		34.5442	5
34.7034	6	34.2592	34.3619	34.3455		34.943	6	34.6824	34.8057	34.871		32.3603	5	32.207	32.0727	32.0565		34.6916	4	34.5996	34.5847	34.6028		32.4708	5	32.42	32.6681	32.5699		34.9336	5	34.5415	34.7614	34.7372		33.8838	5	34.1185	33.9453	33.9391		34.5376	5	34.6269	34.6099	34.6046		34.5445	5
34.7076	6	34.2658	34.3686	34.3517		34.9927	6	34.69	34.8144	34.8785		32.3546	5	32.2036	32.0693	32.0536		34.6874	4	34.6075	34.5928	34.6099		32.4697	5	32.417	32.6656	32.5683		34.931	5	34.5378	34.7548	34.7316		33.8834	5	34.1154	33.9418	33.9352		34.5413	5	34.6236	34.6066	34.6017		34.5436	5
34.6861	4	34.2724	34.3752	34.3578		35.0433	6	34.6976	34.8231	34.8861		32.3564	5	32.2001	32.0659	32.0508		34.6931	4	34.6155	34.6008	34.6169		32.4716	5	32.4141	32.6631	32.5668		34.9213	5	34.5341	34.7482	34.7261		33.8753	5	34.1125	33.9382	33.9314		34.5462	5	34.6203	34.6033	34.5987		34.5437	5
34.6496	4	34.2789	34.3818	34.3639		35.0865	6	34.7052	34.8317	34.8936		32.3601	5	32.1967	32.0626	32.048		34.7087	4	34.6234	34.6088	34.6238		32.4787	5	32.4111	32.6606	32.5654		34.9165	5	34.5304	34.7416	34.7206		33.8617	5	34.1095	33.9347	33.9275		34.5443	5	34.617	34.6001	34.5958		34.5444	5
34.6209	4	34.2854	34.3884	34.37		35.1198	6	34.7127	34.8402	34.9011		32.362	5	32.1933	32.0593	32.0453		34.7299	4	34.6313	34.6167	34.6308		32.4862	5	32.4082	32.6581	32.5639		34.9119	5	34.5266	34.735	34.7151		33.864	5	34.1065	33.9312	33.9237		34.5402	5	34.6137	34.5969	34.5929		34.5439	5
34.5905	4	34.2919	34.3949	34.376		35.1436	6	34.7203	34.8487	34.9085		32.3727	5	32.1899	32.056	32.0426		34.7418	4	34.6392	34.6246	34.6377		32.4895	5	32.4053	32.6556	32.5625		34.9098	5	34.5229	34.7284	34.7097		33.8765	5	34.1036	33.9278	33.92		34.5336	5	34.6104	34.5936	34.59		34.5495	5
34.5627	4	34.2984	34.4014	34.382		35.1664	6	34.7278	34.8572	34.9159		32.3725	5	32.1865	32.0527	32.0399		34.7402	4	34.647	34.6324	34.6445		32.4873	5	32.4025	32.6532	32.5611		34.9118	5	34.5192	34.7219	34.7043		33.8814	5	34.1007	33.9244	33.9162		34.5287	5	34.6071	34.5904	34.5872		34.5497	5
34.5731	4	34.3048	34.4079	34.388		35.1814	6	34.7353	34.8656	34.9233		32.3466	4	32.1933	32.061	32.0466		34.7543	4	34.6548	34.6402	34.6514		32.4871	5	32.3996	32.6508	32.5597		34.9128	6	34.5261	34.7351	34.7157		33.8795	5	34.0978	33.921	33.9125		34.5304	5	34.6038	34.5872	34.5844		34.5414	5
34.5371	4	34.3112	34.4143	34.3939		35.1907	6	34.7427	34.874	34.9306		32.3535	5	32.19	32.0577	32.0439		34.8019	4	34.6626	34.648	34.6582		32.4904	5	32.3968	32.6483	32.5584		34.9218	6	34.533	34.7481	34.7269		33.8761	5	34.0949	33.9176	33.9089		34.528	5	34.6005	34.5841	34.5815		34.5293	5
34.5135	4	34.3176	34.4207	34.3998		35.1987	4	34.7501	34.8823	34.9379		32.3613	4	32.1968	32.066	32.0505		34.8238	4	34.6703	34.6557	34.665		32.5058	5	32.3939	32.6459	32.557		34.937	6	34.5399	34.7609	34.738		33.8787	5	34.092	33.9143	33.9052		34.5232	5	34.5973	34.5809	34.5787		34.5207	5
34.513	4	34.324	34.427	34.4057		35.1753	4	34.7576	34.8906	34.9452		32.3538	5	32.1934	32.0627	32.0478		34.8415	4	34.678	34.6634	34.6717		32.5229	4	32.4032	32.655	32.5653		34.9621	6	34.5468	34.7735	34.7491		33.8815	5	34.0892	33.911	33.9016		34.5192	5	34.594	34.5778	34.576		34.5135	5
34.4957	4	34.3304	34.4333	34.4115		35.1337	4	34.7649	34.8988	34.9524		32.3539	5	32.19	32.0593	32.045		34.8587	4	34.6857	34.6711	34.6784		32.5346	4	32.4125	32.6639	32.5736		34.9902	6	34.5536	34.786	34.76		33.8892	5	34.0864	33.9077	33.898		34.5152	5	34.5908	34.5747	34.5732		34.5072	5
34.4672	4	34.3367	34.4396	34.4173		35.0823	5	34.7607	34.8941	34.9481		32.3534	5	32.1866	32.056	32.0424		34.8754	4	34.6933	34.6787	34.6851		32.5281	4	32.4217	32.6728	32.5818		34.9941	4	34.5604	34.7982	34.7708		33.8925	5	34.0836	33.9045	33.8944		34.5139	6	34.5972	34.5847	34.5826		34.5084	5
34.4473	4	34.343	34.4458	34.4231		35.0339	5	34.7566	34.8895	34.9438		32.3528	5	32.1832	32.0528	32.0397		34.9212	4	34.701	34.6863	34.6918		32.5176	4	32.4309	32.6817	32.59		34.9834	4	34.5672	34.8103	34.7815		33.8906	5	34.0808	33.9012	33.8909		34.5202	6	34.6037	34.5947	34.592		34.5045	5
34.4267	4	34.3493	34.452	34.4288		34.9912	5	34.7524	34.8849	34.9395		32.3568	5	32.1799	32.0495	32.0371		34.9495	4	34.7085	34.6938	34.6984		32.5121	5	32.4278	32.679	32.5884		34.9618	4	34.574	34.8223	34.7921		33.891	5	34.078	33.898	33.8874		34.5231	6	34.6101	34.6046	34.6013		34.5001	5
34.4154	4	34.3556	34.4581	34.4346		34.9589	5	34.7483	34.8803	34.9353		32.3603	5	32.1766	32.0463	32.0346		34.9671	4	34.7161	34.7013	34.705		32.5103	5	32.4248	32.6762	32.5869		34.9434	5	34.5702	34.8155	34.7861		33.8876	5	34.0753	33.8949	33.8839		34.5231	6	34.6165	34.6145	34.6106		34.5016	5
34.4333	4	34.3619	34.4642	34.4402		34.9331	5	34.7441	34.8758	34.9312		32.3535	5	32.1733	32.0432	32.0321		34.9737	4	34.7236	34.7088	34.7115		32.5098	4	32.434	32.6851	32.595		34.9329	5	34.5665	34.8087	34.7803		33.8862	5	34.0725	33.8917	33.8805		34.5233	6	34.6229	34.6243	34.6197		34.4979	5
34.4508	4	34.3681	34.4703	34.4459		34.9081	5	34.74	34.8713	34.9271		32.3503	5	32.17	32.04	32.0296		34.9853	4	34.7311	34.7162	34.7181		32.5052	5	32.4309	32.6823	32.5934		34.9243	5	34.5627	34.802	34.7744		33.8785	5	34.0698	33.8886	33.8771		34.54	6	34.6292	34.634	34.6288		34.4898	5
34.4576	4	34.3743	34.4763	34.4515		34.8897	4	34.7475	34.8796	34.9344		32.3401	5	32.1667	32.0369	32.0271		35.0043	4	34.7386	34.7236	34.7246		32.4985	5	32.4279	32.6795	32.5918		34.9158	5	34.5589	34.7953	34.7686		33.8654	5	34.0671	33.8855	33.8737		34.5716	6	34.6356	34.6436	34.6379		34.483	5
34.4655	4	34.3805	34.4823	34.4571		34.8903	4	34.7549	34.8879	34.9417		32.3359	5	32.1634	32.0338	32.0247		35.0294	4	34.7461	34.731	34.731		32.4913	5	32.4249	32.6767	32.5902		34.9086	5	34.5552	34.7886	34.7629		33.8595	5	34.0645	33.8824	33.8703		34.6	6	34.6419	34.6532	34.6469		34.4703	5
34.4788	4	34.3867	34.4883	34.4626		34.894	4	34.7623	34.8961	34.9489		32.3345	5	32.1602	32.0307	32.0224		35.0524	4	34.7535	34.7383	34.7375		32.4882	5	32.4219	32.674	32.5887		34.907	5	34.5514	34.7819	34.7572		33.8534	5	34.0618	33.8794	33.867		34.6235	6	34.6482	34.6626	34.6558		34.4581	5
34.4902	4	34.3928	34.4942	34.4682		34.8996	4	34.7697	34.9042	34.9561		32.3332	5	32.1569	32.0277	32.0201		35.0782	4	34.7609	34.7456	34.7439		32.4893	5	32.4189	32.6712	32.5872		34.8874	5	34.5477	34.7752	34.7515		33.8507	5	34.0592	33.8763	33.8637		34.6615	6	34.6545	34.6721	34.6647		34.4503	5
34.5016	4	34.3989	34.5001	34.4737		34.9001	4	34.777	34.9123	34.9632		32.3307	5	32.1537	32.0247	32.0178		35.1072	4	34.7682	34.7529	34.7503		32.4888	5	32.4159	32.6685	32.5857		34.8867	5	34.544	34.7686	34.7459		33.8534	5	34.0565	33.8734	33.8604		34.689	6	34.6608	34.6814	34.6735		34.4453	5
34.5138	4	34.4051	34.506	34.4791		34.889	4	34.7843	34.9204	34.9704		32.3275	5	32.1505	32.0217	32.0155		35.127	4	34.7756	34.7601	34.7566		32.4892	5	32.413	32.6659	32.5842		34.8895	5	34.5402	34.7619	34.7403		33.8561	5	34.0539	33.8704	33.8572		34.716	6	34.667	34.6907	34.6823		34.4422	5
34.5338	4	34.4111	34.5118	34.4846		34.8759	4	34.7916	34.9284	34.9774		32.3236	5	32.1473	32.0188	32.0133		35.1471	4	34.7829	34.7672	34.763		32.4811	5	32.4101	32.6632	32.5828		34.8852	5	34.5365	34.7553	34.7347		33.8577	5	34.0513	33.8674	33.854		34.744	6	34.6732	34.6999	34.691		34.4415	5
34.5293	4	34.4172	34.5176	34.49		34.8777	4	34.7989	34.9363	34.9845		32.3246	5	32.1442	32.0159	32.0111		35.168	4	34.7902	34.7744	34.7693		32.4729	5	32.4072	32.6606	32.5814		34.8838	5	34.5328	34.7487	34.7292		33.8599	5	34.0488	33.8645	33.8508		34.7752	6	34.6795	34.7091	34.6996		34.4415	5
34.5241	4	34.4232	34.5233	34.4954		34.879	4	34.8062	34.9442	34.9915		32.3281	5	32.141	32.013	32.009		35.1786	4	34.7974	34.7815	34.7755		32.4671	5	32.4043	32.658	32.58		34.8831	5	34.529	34.7421	34.7237		33.858	5	34.0462	33.8616	33.8476		34.7897	4	34.6856	34.7181	34.7082		34.443	5
34.5246	4	34.4293	34.529	34.5007		34.8895	4	34.8134	34.952	34.9985		32.3323	5	32.1379	32.0101	32.0069		35.1851	4	34.8046	34.7886	34.7818		32.4623	5	32.4014	32.6554	32.5786		34.887	5	34.5253	34.7355	34.7182		33.8552	5	34.0437	33.8588	33.8445		34.7772	4	34.6918	34.7272	34.7167		34.4461	5
34.5275	4	34.4353	34.5347	34.506		34.9066	4	34.8206	34.9598	35.0054		32.3411	5	32.1348	32.0073	32.0048		35.1936	4	34.8118	34.7956	34.788		32.4565	5	32.3986	32.6528	32.5772		34.8883	5	34.5216	34.7289	34.7128		33.85	5	34.0411	33.8559	33.8414		34.7425	6	34.698	34.7361	34.7252		34.4532	5
34.5386	4	34.4413	34.5404	34.5113		34.9213	4	34.8278	34.9676	35.0123		32.3427	5	32.1317	32.0045	32.0028		35.2104	4	34.819	34.8026	34.7942		32.4579	5	32.3957	32.6502	32.5759		34.8931	5	34.5179	34.7224	34.7074		33.8488	5	34.0386	33.8531	33.8383		34.7029	6	34.7041	34.745	34.7336		34.4547	5
34.5453	4	34.4472	34.546	34.5166		34.931	4	34.835	34.9753	35.0191		32.3471	5	32.1286	32.0017	32.0008		35.2217	4	34.8261	34.8096	34.8004		32.4507	5	32.3929	32.6476	32.5746		34.8926	5	34.5142	34.7158	34.7021		33.8507	5	34.0362	33.8503	33.8352		34.6727	6	34.7102	34.7538	34.7419		34.4555	5
34.56	4	34.4532	34.5516	34.5218		34.9353	4	34.8421	34.9829	35.0259		32.3504	5	32.1255	31.9989	31.9988		35.2352	4	34.8332	34.8165	34.8065		32.4432	5	32.3901	32.6451	32.5733		34.8975	5	34.5105	34.7093	34.6968		33.8503	5	34.0337	33.8475	33.8322		34.6423	6	34.7163	34.7625	34.7502		34.455	5
34.5717	4	34.4591	34.5571	34.527		34.9436	4	34.8492	34.9905	35.0327		32.3549	5	32.1224	31.9962	31.9968		35.2541	4	34.8403	34.8234	34.8126		32.4328	5	32.3874	32.6426	32.5721		34.9105	5	34.5068	34.7028	34.6915		33.8491	5	34.0312	33.8448	33.8292		34.6187	6	34.7224	34.7712	34.7585		34.4571	5
34.5887	4	34.465	34.5626	34.5322		34.9482	4	34.8563	34.9981	35.0395		32.3543	5	32.1194	31.9935	31.9949		35.2695	4	34.8474	34.8302	34.8187		32.4253	5	32.3846	32.64	32.5709		34.9299	6	34.5138	34.7162	34.7031		33.8498	5	34.0288	33.8421	33.8262		34.6161	6	34.7285	34.7798	34.7667		34.4569	5
34.601	4	34.4709	34.5681	34.5374		34.949	4	34.8634	35.0056	35.0462		32.3536	5	32.1164	31.9908	31.993		35.2807	4	34.8544	34.8371	34.8247		32.4188	5	32.3818	32.6375	32.5697		34.946	6	34.5207	34.7294	34.7146		33.8452	5	34.0264	33.8394	33.8233		34.6248	6	34.7345	34.7884	34.7748		34.4515	5
34.6039	4	34.4767	34.5735	34.5425		34.9559	4	34.8705	35.013	35.0529		32.3551	5	32.1133	31.9881	31.9911		35.3074	4	34.8614	34.8439	34.8307		32.4213	5	32.3791	32.6351	32.5685		34.9506	6	34.5276	34.7425	34.7259		33.8288	5	34.024	33.8367	33.8203		34.6295	6	34.7406	34.7969	34.7829		34.4459	5
34.6226	4	34.4826	34.579	34.5476		34.9746	4	34.8775	35.0204	35.0595		32.3653	5	32.1103	31.9855	31.9893		35.3278	4	34.8684	34.8506	34.8367		32.4194	5	32.3764	32.6326	32.5673		34.9537	4	34.5345	34.7554	34.7371		33.8203	5	34.0216	33.8341	33.8174		34.6396	6	34.7466	34.8053	34.7909		34.4395	5
34.6365	4	34.4884	34.5843	34.5527		34.9941	4	34.8845	35.0278	35.0661		32.372	5	32.1073	31.9829	31.9875		35.3452	4	34.8753	34.8573	34.8427		32.4125	5	32.3737	32.6301	32.5661		34.9416	4	34.5414	34.7681	34.7482		33.8178	5	34.0192	33.8314	33.8145		34.6678	6	34.7526	34.8136	34.7989		34.4224	4
34.6578	4	34.4942	34.5897	34.5577		35.0084	4	34.8915	35.0351	35.0727		32.3746	5	32.1044	31.9803	31.9857		35.3679	4	34.8823	34.864	34.8486		32.405	5	32.3711	32.6277	32.5649		34.9255	4	34.5483	34.7807	34.7592		33.8218	5	34.0168	33.8288	33.8117		34.694	6	34.7586	34.8219	34.8068		34.4098	4
34.6815	4	34.5	34.595	34.5627		35.021	4	34.8985	35.0424	35.0793		32.3717	6	32.1115	31.9892	31.9927		35.3905	4	34.8891	34.8707	34.8545		32.4036	4	32.3804	32.6367	32.5733		34.9113	4	34.5551	34.793	34.77		33.826	5	34.0145	33.8263	33.8089		34.7182	6	34.7645	34.8301	34.8146		34.3979	5
34.7012	4	34.5057	34.6003	34.5677		35.0341	4	34.9054	35.0497	35.0858		32.3701	6	32.1186	31.9981	31.9996		35.4212	4	34.896	34.8773	34.8604		32.4011	4	32.3898	32.6457	32.5817		34.898	4	34.5619	34.8052	34.7808		33.8307	5	34.0122	33.8237	33.8061		34.7436	6	34.7705	34.8383	34.8225		34.3937	5
34.7148	4	34.5115	34.6055	34.5727		35.0451	4	34.9123	35.0569	35.0923		32.3806	6	32.1256	32.0068	32.0066		35.4353	4	34.9029	34.8839	34.8663		32.3902	5	32.387	32.6431	32.5804		34.8891	4	34.5687	34.8173	34.7914		33.835	5	34.0098	33.8212	33.8033		34.7648	6	34.7764	34.8464	34.8302		34.3957	5
34.7278	4	34.5172	34.6107	34.5776		35.0595	4	34.9192	35.064	35.0987		32.3946	6	32.1326	32.0156	32.0135		35.4408	4	34.9097	34.8904	34.8721		32.3779	5	32.3842	32.6405	32.5791		34.8812	5	34.5649	34.8105	34.7856		33.8401	5	34.0075	33.8187	33.8005		34.7844	6	34.7823	34.8545	34.8379		34.3972	5
34.7396	4	34.5229	34.6159	34.5825		35.0721	4	34.9261	35.0712	35.1052		32.4177	6	32.1397	32.0242	32.0204		35.4433	4	34.9165	34.897	34.8779		32.3749	5	32.3815	32.6379	32.5779		34.8704	5	34.5612	34.8038	34.7797		33.8442	5	34.0053	33.8162	33.7978		34.8117	6	34.7882	34.8624	34.8456		34.3973	5
34.7469	4	34.5286	34.6211	34.5874		35.0857	4	34.933	35.0782	35.1116		32.4428	6	32.1466	32.0328	32.0272		35.4534	4	34.9232	34.9035	34.8837		32.3721	5	32.3788	32.6354	32.5766		34.8656	4	34.568	34.8159	34.7903		33.8446	5	34.003	33.8137	33.7951		34.8257	6	34.7941	34.8704	34.8532		34.3977	5
34.7554	4	34.5342	34.6262	34.5922		35.0987	4	34.9398	35.0853	35.1179		32.4607	4	32.1536	32.0414	32.034		35.4603	4	34.93	34.9099	34.8895		32.3718	5	32.3761	32.6329	32.5754		34.8689	4	34.5747	34.8278	34.8009		33.8446	5	34.0007	33.8113	33.7924		34.8287	6	34.7999	34.8783	34.8607		34.4014	5
34.7659	4	34.5399	34.6313	34.597		35.1116	4	34.9466	35.0923	35.1242		32.4561	4	32.1605	32.0498	32.0408		35.4596	4	34.9367	34.9164	34.8952		32.3703	5	32.3734	32.6303	32.5743		34.8794	4	34.5815	34.8396	34.8113		33.8444	5	33.9985	33.8089	33.7897		34.8311	6	34.8057	34.8861	34.8682		34.4053	5
34.7784	4	34.5455	34.6363	34.6018		35.1258	4	34.9534	35.0993	35.1305		32.4355	5	32.1573	32.0467	32.0383		35.4623	4	34.9434	34.9228	34.9009		32.3722	5	32.3707	32.6278	32.5731		34.8818	5	34.5777	34.8328	34.8052		33.8446	5	33.9963	33.8065	33.7871		34.8358	6	34.8116	34.8938	34.8757		34.4056	5
34.7926	4	34.5511	34.6414	34.6066		35.1384	4	34.9602	35.1062	35.1368		32.4185	5	32.1541	32.0435	32.0358		35.4769	4	34.95	34.9291	34.9066		32.3732	5	32.368	32.6254	32.572		34.8849	5	34.5739	34.826	34.7993		33.845	5	33.9941	33.8041	33.7845		34.839	6	34.8174	34.9015	34.8831		34.3972	5
34.7987	4	34.5567	34.6463	34.6113		35.1541	4	34.967	35.1131	35.143		32.4074	4	32.161	32.052	32.0426		35.4963	4	34.9567	34.9355	34.9123		32.3726	5	32.3654	32.6229	32.5709		34.8911	5	34.5702	34.8192	34.7933		33.8413	5	33.9919	33.8017	33.7819		34.8412	4	34.8232	34.9092	34.8904		34.3895	5
34.808	4	34.5623	34.6513	34.6161		35.1697	4	34.9737	35.1199	35.1492		32.3932	5	32.1578	32.0488	32.04		35.497	4	34.9633	34.9418	34.9179		32.3735	5	32.3628	32.6204	32.5698		34.8926	5	34.5664	34.8125	34.7874		33.8358	5	33.9897	33.7994	33.7793		34.8328	4	34.8289	34.9168	34.8977		34.3848	5
34.8188	4	34.5678	34.6562	34.6207		35.1803	4	34.9804	35.1268	35.1553		32.3816	5	32.1546	32.0456	32.0376		35.5011	4	34.9698	34.948	34.9235		32.3711	5	32.3602	32.618	32.5687		34.8872	5	34.5626	34.8057	34.7815		33.8345	5	33.9875	33.7971	33.7767		34.7977	4	34.8347	34.9243	34.9049		34.3817	5
34.831	4	34.5734	34.6612	34.6254		35.1894	4	34.9871	35.1335	35.1614		32.3734	5	32.1514	32.0424	32.0351		35.5023	4	34.9764	34.9543	34.9291		32.3724	5	32.3576	32.6156	32.5677		34.8901	5	34.5589	34.799	34.7756		33.8354	5	33.9854	33.7948	33.7742		34.7628	4	34.8404	34.9318	34.9121		34.3806	5
34.8493	4	34.5789	34.666	34.63		35.2017	4	34.9938	35.1403	35.1675		32.3708	5	32.1482	32.0393	32.0327		35.5079	4	34.9829	34.9605	34.9347		32.3742	6	32.367	32.6246	32.5761		34.8943	5	34.5551	34.7923	34.7698		33.8354	5	33.9832	33.7925	33.7717		34.7175	4	34.8461	34.9392	34.9192		34.3814	5
34.8698	4	34.5844	34.6709	34.6347		35.2134	4	35.0004	35.147	35.1736		32.3688	5	32.145	32.0362	32.0304		35.4522	4	34.9895	34.9667	34.9402		32.375	6	32.3764	32.6335	32.5845		34.8984	5	34.5514	34.7856	34.7641		33.8371	5	33.9811	33.7902	33.7692		34.6737	5	34.8422	34.934	34.9141		34.3782	5
34.877	4	34.5898	34.6757	34.6392		35.2215	4	35.007	35.1536	35.1796		32.3622	5	32.1419	32.0331	32.0281		35.4884	4	34.9959	34.9728	34.9457		32.3817	6	32.3857	32.6424	32.5929		34.9114	5	34.5476	34.7789	34.7583		33.8405	5	33.979	33.788	33.7668		34.6378	5	34.8384	34.9288	34.909		34.3709	5
34.8938	4	34.5953	34.6805	34.6438		35.2333	4	35.0136	35.1602	35.1856		32.3658	5	32.1387	32.03	32.0258		35.4673	4	35.0024	34.9789	34.9512		32.3977	6	32.3951	32.6513	32.6012		34.9214	5	34.5439	34.7722	34.7526		33.839	5	33.9769	33.7858	33.7643		34.6125	5	34.8345	34.9236	34.904		34.3667	5
34.912	4	34.6007	34.6852	34.6483		35.248	4	35.0202	35.1668	35.1916		32.3643	5	32.1356	32.027	32.0235		35.4441	4	35.0088	34.985	34.9566		32.418	6	32.4043	32.6601	32.6095		34.9196	5	34.5401	34.7655	34.7469		33.8368	5	33.9748	33.7836	33.7619		34.5921	5	34.8306	34.9184	34.8989		34.3587	5
34.9258	4	34.6061	34.6899	34.6529		35.2594	4	35.0268	35.1733	35.1975		32.3547	5	32.1325	32.0239	32.0213		35.4399	4	35.0152	34.9911	34.9621		32.4307	6	32.4136	32.6688	32.6178		34.9222	5	34.5364	34.7589	34.7413		33.8354	5	33.9728	33.7814	33.7595		34.5769	4	34.8364	34.9259	34.9062		34.3525	5
34.9411	4	34.6115	34.6946	34.6573		35.2673	4	35.0333	35.1798	35.2034		32.3474	5	32.1294	32.0209	32.0191		35.4227	4	35.0216	34.9971	34.9675		32.4524	6	32.4228	32.6775	32.626		34.9274	5	34.5327	34.7522	34.7357		33.8303	5	33.9707	33.7793	33.7571		34.5575	5	34.8325	34.9208	34.9011		34.351	5
34.9476	4	34.6169	34.6993	34.6618		35.2716	4	35.0399	35.1862	35.2093		32.3407	5	32.1263	32.0179	32.017		35.4043	4	35.028	35.0031	34.9728		32.4778	6	32.432	32.6862	32.6342		34.9279	5	34.529	34.7456	34.7301		33.8268	5	33.9687	33.7772	33.7547		34.5433	5	34.8287	34.9156	34.8961		34.3571	5
34.951	4	34.6223	34.7039	34.6663		35.2833	4	35.0464	35.1926	35.2151		32.3364	4	32.1333	32.0265	32.0239		35.3762	4	35.0343	35.0091	34.9782		32.5109	6	32.4411	32.6948	32.6423		34.9256	5	34.5253	34.739	34.7246		33.8302	5	33.9666	33.775	33.7524		34.5316	5	34.8248	34.9105	34.8912		34.3575	5
34.9497	4	34.6276	34.7085	34.6707		35.2957	4	35.0528	35.199	35.2209		32.3256	5	32.1302	32.0235	32.0217		35.3697	4	35.0406	35.015	34.9835		32.546	6	32.4502	32.7033	32.6504		34.9242	5	34.5215	34.7324	34.719		33.8331	5	33.9646	33.7729	33.7501		34.5274	5	34.821	34.9054	34.8862		34.3553	5
34.9272	4	34.633	34.7131	34.6751		35.3017	4	35.0593	35.2053	35.2267		32.3221	5	32.1271	32.0205	32.0195		35.3729	4	35.0469	35.0209	34.9888		32.5701	6	32.4593	32.7119	32.6585		34.9252	5	34.5178	34.7258	34.7136		33.8364	5	33.9626	33.7709	33.7478		34.5268	4	34.8267	34.913	34.8935		34.3613	5
34.9154	4	34.6383	34.7177	34.6794		35.3074	4	35.0657	35.2116	35.2324		32.3213	5	32.1241	32.0175	32.0173		35.3593	4	35.0532	35.0268	34.9941		32.6114	6	32.4683	32.7203	32.6666		34.9341	5	34.5141	34.7193	34.7081		33.8356	5	33.9606	33.7688	33.7455		34.5089	5	34.8229	34.9079	34.8886		34.3548	5
34.9102	4	34.6436	34.7222	34.6838		35.3197	4	35.0722	35.2178	35.2381		32.3253	5	32.121	32.0145	32.0152		35.335	4	35.0594	35.0326	34.9993		32.6464	6	32.4773	32.7287	32.6746		34.9356	5	34.5104	34.7127	34.7027		33.8357	5	33.9587	33.7667	33.7432		34.4999	4	34.8287	34.9155	34.8959		34.3407	5
34.9127	4	34.6488	34.7267	34.6881		35.3273	4	35.0786	35.224	35.2438		32.3288	5	32.118	32.0116	32.0131		35.3103	4	35.0656	35.0385	35.0046		32.66	6	32.4863	32.7371	32.6826		34.9433	5	34.5068	34.7062	34.6973		33.8439	5	33.9567	33.7647	33.741		34.496	5	34.8248	34.9103	34.8909		34.3339	5
34.9223	4	34.6541	34.7312	34.6924		35.3335	4	35.0849	35.2302	35.2495		32.3353	5	32.115	32.0086	32.011		35.2908	4	35.0718	35.0443	35.0098		32.6736	6	32.4952	32.7454	32.6905		34.9539	5	34.5031	34.6996	34.692		33.8494	6	33.9666	33.7767	33.7531		34.488	5	34.821	34.9052	34.886		34.3213	5
34.934	4	34.6593	34.7356	34.6967		35.346	4	35.0913	35.2363	35.2551		32.3446	5	32.1119	32.0057	32.0089		35.2737	4	35.078	35.05	35.015		32.6663	6	32.5041	32.7537	32.6984		34.9561	5	34.4994	34.6931	34.6867		33.8607	6	33.9765	33.7885	33.7652		34.4943	5	34.8172	34.9002	34.8811		34.316	5
34.9355	4	34.6645	34.74	34.7009		35.3534	4	35.0976	35.2424	35.2607		32.3465	4	32.119	32.0144	32.0158		35.252	4	35.0841	35.0558	35.0201		32.6615	6	32.513	32.7619	32.7063		34.9564	5	34.4957	34.6866	34.6814		33.8717	6	33.9863	33.8003	33.7772		34.4996	4	34.823	34.9078	34.8884		34.3174	5
34.9256	4	34.6697	34.7444	34.7052		35.3583	4	35.104	35.2484	35.2662		32.3436	4	32.1261	32.023	32.0227		35.242	4	35.0902	35.0615	35.0253		32.6609	6	32.5218	32.77	32.7142		34.9499	5	34.4921	34.6801	34.6761		33.8839	6	33.9961	33.8121	33.7891		34.4926	5	34.8191	34.9027	34.8835		34.3187	5
34.9208	4	34.6749	34.7488	34.7094		35.362	4	35.1103	35.2544	35.2717		32.3402	5	32.123	32.0199	32.0205		35.2271	4	35.0963	35.0672	35.0304		32.6658	6	32.5307	32.7782	32.722		34.9484	5	34.4884	34.6736	34.6709		33.9073	6	34.0059	33.8237	33.8009		34.4905	5	34.8153	34.8976	34.8786		34.3223	5
34.9192	4	34.6801	34.7532	34.7136		35.3651	4	35.1165	35.2604	35.2772		32.3373	5	32.12	32.0169	32.0182		35.2201	4	35.1024	35.0728	35.0355		32.6673	6	32.5394	32.7862	32.7298		34.9518	5	34.4847	34.6672	34.6657		33.9533	6	34.0156	33.8353	33.8126		34.4913	5	34.8115	34.8926	34.8738		34.3251	5
34.9265	4	34.6852	34.7575	34.7178		35.3675	4	35.1228	35.2663	35.2827		32.3372	5	32.1169	32.0139	32.016		35.2121	4	35.1085	35.0784	35.0405		32.6716	6	32.5482	32.7943	32.7375		34.9568	5	34.4811	34.6607	34.6605		34.0064	6	34.0253	33.8468	33.8243		34.4943	5	34.8077	34.8876	34.869		34.3196	5
34.9353	4	34.6904	34.7618	34.7219		35.3611	4	35.1291	35.2722	35.2881		32.3426	5	32.1139	32.0109	32.0139		35.1989	4	35.1145	35.084	35.0456		32.6856	6	32.5569	32.8022	32.7452		34.9608	5	34.4774	34.6543	34.6554		34.0488	6	34.0349	33.8582	33.8359		34.4961	5	34.8039	34.8826	34.8642		34.3135	5
34.9489	4	34.6955	34.766	34.726		35.3589	4	35.1353	35.2781	35.2935		32.3426	5	32.1109	32.008	32.0117		35.2178	4	35.1205	35.0896	35.0506		32.7009	6	32.5656	32.8102	32.7529		34.9591	5	34.4738	34.6479	34.6503		34.0918	6	34.0445	33.8696	33.8474		34.5046	5	34.8001	34.8776	34.8594		34.3115	5
34.9648	4	34.7006	34.7703	34.7301		35.3562	4	35.1415	35.2839	35.2989		32.3451	4	32.118	32.0166	32.0186		35.2417	4	35.1265	35.0952	35.0556		32.7156	6	32.5742	32.8181	32.7606		34.9609	5	34.4701	34.6414	34.6452		34.1254	6	34.0541	33.8809	33.8588		34.5146	5	34.7964	34.8727	34.8547		34.3093	5
34.9678	4	34.7057	34.7745	34.7342		35.3519	4	35.1477	35.2896	35.3042		32.3642	5	32.115	32.0136	32.0164		35.2507	4	35.1324	35.1007	35.0605		32.7281	6	32.5828	32.8259	32.7682		34.964	5	34.4665	34.6351	34.6402		34.1472	6	34.0636	33.8921	33.8702		34.5192	5	34.7926	34.8678	34.85		34.308	4
34.98	4	34.7107	34.7787	34.7383		35.3535	4	35.1538	35.2954	35.3096		32.3663	5	32.112	32.0106	32.0142		35.2545	4	35.1384	35.1062	35.0655		32.7408	6	32.5914	32.8337	32.7758		34.9676	5	34.4629	34.6287	34.6352		34.1651	4	34.0731	33.9032	33.8815		34.5239	5	34.7888	34.8629	34.8454		34.2974	5
34.9887	4	34.7158	34.7829	34.7423		35.3605	4	35.16	35.3011	35.3149		32.3587	5	32.109	32.0077	32.0121		35.2664	4	35.1443	35.1116	35.0704		32.7521	6	32.5999	32.8415	32.7833		34.9686	4	34.47	34.643	34.6471		34.1638	4	34.0825	33.9143	33.8927		34.5275	5	34.7851	34.8581	34.8408		34.3006	5
35.0075	4	34.7208	34.7871	34.7463		35.3692	4	35.1661	35.3068	35.3201		32.3492	5	32.106	32.0048	32.01		35.2815	4	35.1502	35.1171	35.0753		32.7632	6	32.6085	32.8492	32.7909		34.965	4	34.477	34.6572	34.6589		34.1421	4	34.092	33.9253	33.9038		34.5284	5	34.7814	34.8533	34.8362		34.3062	5
35.0309	4	34.7258	34.7912	34.7503		35.3696	4	35.1722	35.3124	35.3254		32.3428	4	32.1131	32.0134	32.0169		35.2736	4	35.156	35.1225	35.0801		32.7679	6	32.617	32.8569	32.7983		34.9529	4	34.4841	34.6712	34.6707		34.1158	5	34.0891	33.9221	33.9003		34.5372	5	34.7776	34.8485	34.8316		34.3105	5
35.0519	4	34.7308	34.7953	34.7543		35.3655	4	35.1783	35.318	35.3306		32.3308	4	32.1201	32.0219	32.0237		35.2659	4	35.1619	35.1278	35.085		32.7742	6	32.6254	32.8645	32.8058		34.9541	5	34.4804	34.6648	34.6654		34.0903	5	34.0863	33.9189	33.8969		34.5332	5	34.7739	34.8437	34.8271		34.318	5
35.0632	4	34.7358	34.7994	34.7583		35.3592	4	35.1844	35.3235	35.3358		32.3299	4	32.1272	32.0305	32.0306		35.2536	4	35.1677	35.1332	35.0898		32.7861	4	32.6338	32.8721	32.8132		34.9526	5	34.4768	34.6583	34.6602		34.0675	5	34.0835	33.9158	33.8934		34.5348	5	34.7702	34.8389	34.8226		34.3202	5
35.0559	4	34.7407	34.8035	34.7622		35.348	4	35.1904	35.329	35.341		32.3288	5	32.1241	32.0273	32.0282		35.2688	4	35.1735	35.1385	35.0946		32.7737	4	32.6422	32.8796	32.8206		34.9554	5	34.4732	34.6519	34.6551		34.046	5	34.0807	33.9126	33.89		34.5422	5	34.7665	34.8342	34.8181		34.3259	5
35.0475	4	34.7457	34.8075	34.7661		35.3367	4	35.1964	35.3345	35.3461		32.3234	5	32.1211	32.0242	32.0259		35.2801	4	35.1793	35.1438	35.0993		32.7513	4	32.6506	32.8871	32.8279		34.9589	5	34.4695	34.6455	34.6499		34.0349	5	34.078	33.9095	33.8867		34.5314	5	34.7628	34.8295	34.8137		34.3375	5
35.0312	4	34.7506	34.8116	34.77		35.3246	4	35.2025	35.3399	35.3513		32.3262	5	32.118	32.0212	32.0237		35.2751	4	35.185	35.1491	35.1041		32.7211	4	32.6589	32.8946	32.8352		34.9687	5	34.4659	34.6391	34.6448		34.0267	5	34.0752	33.9065	33.8833		34.5221	5	34.7592	34.8248	34.8093		34.343	5
35.007	4	34.7555	34.8156	34.7739		35.3194	4	35.2084	35.3453	35.3564		32.3339	5	32.115	32.0181	32.0214		35.2856	4	35.1908	35.1543	35.1088		32.6875	4	32.6672	32.902	32.8424		34.9686	5	34.4623	34.6327	34.6397		34.018	5	34.0725	33.9034	33.88		34.5146	5	34.7555	34.8202	34.805		34.3483	5
34.9917	4	34.7604	34.8196	34.7778		35.3182	4	35.2144	35.3507	35.3614		32.3449	5	32.112	32.0151	32.0192		35.2808	4	35.1965	35.1596	35.1135		32.6596	4	32.6755	32.9094	32.8497		34.9671	5	34.4586	34.6264	34.6347		34.0114	5	34.0698	33.9004	33.8767		34.5066	5	34.7518	34.8156	34.8006		34.3465	5
34.9831	4	34.7653	34.8235	34.7816		35.3105	4	35.2204	35.356	35.3665		32.3477	5	32.109	32.0121	32.0171		35.2912	4	35.2022	35.1647	35.1182		32.6379	4	32.6837	32.9167	32.8569		34.9668	5	34.455	34.62	34.6297		34.0021	4	34.0792	33.9115	33.8879		34.5046	5	34.7482	34.811	34.7963		34.3462	5
34.9918	4	34.7701	34.8275	34.7854		35.3098	4	35.2263	35.3613	35.3715		32.3512	5	32.106	32.0091	32.0149		35.3002	4	35.2078	35.1699	35.1228		32.6296	4	32.6919	32.924	32.864		34.9616	5	34.4514	34.6137	34.6247		33.9927	5	34.0765	33.9084	33.8846		34.5036	5	34.7445	34.8064	34.792		34.3484	5
34.994	4	34.775	34.8314	34.7892		35.315	4	35.2322	35.3665	35.3766		32.3549	5	32.1031	32.0062	32.0128		35.2894	4	35.2135	35.175	35.1274		32.6265	4	32.7001	32.9312	32.8712		34.9588	5	34.4478	34.6074	34.6197		33.9756	5	34.0737	33.9054	33.8812		34.5013	5	34.7409	34.8019	34.7878		34.3548	5
35.0081	4	34.7798	34.8353	34.793		35.3133	4	35.2381	35.3717	35.3816		32.3485	5	32.1001	32.0033	32.0108		35.2864	4	35.2191	35.1802	35.132		32.6096	4	32.7083	32.9384	32.8783		34.9566	5	34.4442	34.601	34.6148		33.9647	5	34.071	33.9024	33.8779		34.4968	5	34.7373	34.7973	34.7836		34.3563	5
35.007	4	34.7846	34.8392	34.7968		35.3116	4	35.244	35.3769	35.3865		32.3421	5	32.0972	32.0004	32.0087		35.2838	4	35.2247	35.1853	35.1366		32.5972	4	32.7164	32.9456	32.8854		34.9483	5	34.4406	34.5948	34.6099		33.9592	5	34.0683	33.8994	33.8746		34.4958	4	34.7433	34.8056	34.7916		34.3653	5
35.013	4	34.7894	34.8431	34.8005		35.3106	4	35.2499	35.382	35.3915		32.3407	4	32.1043	32.009	32.0157		35.2781	4	35.2303	35.1903	35.1411		32.5869	4	32.7245	32.9527	32.8924		34.9353	5	34.437	34.5885	34.605		33.9608	5	34.0656	33.8964	33.8714		34.4891	5	34.7397	34.8011	34.7873		34.3795	6
35.0053	4	34.7942	34.8469	34.8042		35.3072	4	35.2557	35.3871	35.3964		32.3359	5	32.1013	32.0061	32.0136		35.2762	4	35.2358	35.1954	35.1457		32.5797	4	32.7325	32.9597	32.8995		34.9197	5	34.4334	34.5822	34.6002		33.96	5	34.063	33.8934	33.8682		34.4801	5	34.7361	34.7966	34.7831		34.3933	6
35.0112	4	34.7989	34.8508	34.8079		35.3101	4	35.2615	35.3922	35.4013		32.3146	4	32.1084	32.0147	32.0205		35.2752	4	35.2414	35.2004	35.1502		32.5776	4	32.7405	32.9668	32.9065		34.9054	5	34.4298	34.576	34.5954		33.9536	5	34.0603	33.8905	33.865		34.4844	5	34.7325	34.7921	34.7789		34.412	6
34.9997	4	34.8037	34.8546	34.8116		35.3108	4	35.2674	35.3972	35.4061		32.3128	5	32.1055	32.0117	32.0183		35.2731	4	35.2469	35.2054	35.1547		32.5802	4	32.7485	32.9738	32.9134		34.8959	5	34.4263	34.5697	34.5906		33.9485	5	34.0577	33.8876	33.8618		34.4931	5	34.7289	34.7877	34.7748		34.4301	4
35.0013	4	34.8084	34.8584	34.8153		35.3157	4	35.2731	35.4022	35.411		32.3088	5	32.1025	32.0087	32.0161		35.2697	4	35.2524	35.2103	35.1591		32.5867	4	32.7565	32.9807	32.9204		34.8955	5	34.4227	34.5635	34.5859		33.9416	5	34.0551	33.8847	33.8586		34.5027	5	34.7253	34.7832	34.7707		34.4321	4
35.023	4	34.8131	34.8621	34.8189		35.3155	4	35.2789	35.4072	35.4158		32.2992	5	32.0996	32.0058	32.014		35.2621	4	35.2578	35.2153	35.1636		32.5853	4	32.7644	32.9876	32.9273		34.8962	5	34.4191	34.5573	34.5811		33.9372	5	34.0525	33.8819	33.8555		34.5093	5	34.7217	34.7788	34.7666		34.4236	4
35.0756	4	34.8178	34.8659	34.8226		35.3151	4	35.2847	35.4122	35.4206		32.2676	5	32.0966	32.0028	32.0119		35.2569	4	35.2633	35.2202	35.168		32.5809	5	32.7593	32.9814	32.923		34.9035	5	34.4155	34.5511	34.5765		33.9368	5	34.0499	33.8791	33.8524		34.5129	5	34.7181	34.7744	34.7625		34.4149	4
35.0466	4	34.8225	34.8696	34.8262		35.3093	4	35.2904	35.4171	35.4254		32.3091	5	32.0937	31.9999	32.0099		35.251	4	35.2687	35.2251	35.1724		32.5768	5	32.7542	32.9753	32.9189		34.9174	5	34.412	34.5449	34.5718		33.9346	5	34.0473	33.8762	33.8493		34.5126	4	34.7242	34.7829	34.7706		34.4125	5
35.0688	4	34.8271	34.8733	34.8298		35.3049	4	35.2961	35.422	35.4301		32.3049	5	32.0908	31.9971	32.0078		35.2646	4	35.2741	35.2299	35.1768		32.5655	5	32.7491	32.9692	32.9147		34.9143	5	34.4084	34.5388	34.5672		33.9287	5	34.0448	33.8735	33.8463		34.5046	5	34.7206	34.7785	34.7665		34.422	5
35.0745	4	34.8318	34.877	34.8334		35.3024	4	35.3018	35.4268	35.4348		32.3049	5	32.0879	31.9942	32.0058		35.2779	4	35.2795	35.2348	35.1812		32.5569	5	32.744	32.9632	32.9107		34.9105	5	34.4049	34.5326	34.5626		33.9221	5	34.0423	33.8707	33.8432		34.5027	5	34.7171	34.7741	34.7625		34.4342	5
35.0538	4	34.8364	34.8807	34.8369		35.3	4	35.3075	35.4317	35.4395		32.3077	5	32.085	31.9914	32.0039		35.2768	4	35.2849	35.2396	35.1856		32.557	5	32.739	32.9572	32.9067		34.9076	5	34.4013	34.5265	34.558		33.9137	5	34.0397	33.868	33.8402		34.4982	5	34.7135	34.7697	34.7584		34.4388	5
35.0449	4	34.841	34.8843	34.8404		35.2946	4	35.3132	35.4365	35.4442		32.3018	5	32.0821	31.9886	32.002		35.2948	4	35.2902	35.2444	35.1899		32.5555	4	32.747	32.9642	32.9137		34.9089	5	34.3978	34.5204	34.5535		33.9169	5	34.0372	33.8653	33.8373		34.4974	5	34.71	34.7654	34.7544		34.4496	5
35.0561	4	34.8456	34.888	34.844		35.2843	4	35.3188	35.4412	35.4488		32.2915	5	32.0793	31.9858	32.0001		35.3106	4	35.2956	35.2491	35.1943		32.5447	4	32.755	32.9712	32.9206		34.9084	5	34.3943	34.5143	34.549		33.9185	5	34.0348	33.8626	33.8343		34.4957	5	34.7064	34.761	34.7504		34.4664	5
35.0744	4	34.8502	34.8916	34.8475		35.2879	4	35.3244	35.446	35.4534		32.2897	5	32.0765	31.983	31.9982		35.334	4	35.3009	35.2539	35.1986		32.525	5	32.7499	32.9651	32.9165		34.9203	6	34.4016	34.5303	34.5618		33.9183	5	34.0323	33.8599	33.8314		34.5039	5	34.7029	34.7567	34.7465		34.475	5
35.0946	4	34.8548	34.8952	34.8509		35.3106	4	35.33	35.4507	35.458		32.2888	5	32.0736	31.9803	31.9964		35.3424	4	35.3062	35.2586	35.2028		32.5079	5	32.7448	32.9591	32.9125		34.9334	6	34.4088	34.5462	34.5744		33.9191	5	34.0299	33.8573	33.8285		34.5044	5	34.6994	34.7524	34.7425		34.4753	5
35.1138	4	34.8593	34.8988	34.8544		35.3251	4	35.3356	35.4553	35.4626		32.2936	5	32.0708	31.9776	31.9946		35.3572	4	35.3114	35.2633	35.2071		32.4988	5	32.7398	32.9531	32.9085		34.9519	6	34.4161	34.5619	34.5869		33.926	5	34.0274	33.8547	33.8256		34.503	5	34.6958	34.7482	34.7386		34.4822	5
35.1341	4	34.8639	34.9023	34.8578		35.3413	4	35.3412	35.46	35.4671		32.2981	5	32.068	31.9749	31.9928		35.3555	4	35.3167	35.268	35.2114		32.4922	5	32.7348	32.9472	32.9045		34.9779	6	34.4233	34.5773	34.5992		33.9253	5	34.025	33.8521	33.8227		34.4916	5	34.6923	34.7439	34.7347		34.4813	4
35.1442	4	34.8684	34.9059	34.8613		35.3515	4	35.3468	35.4646	35.4716		32.3046	5	32.0652	31.9722	31.991		35.3621	4	35.3219	35.2726	35.2156		32.4882	5	32.7298	32.9414	32.9006		35.0121	6	34.4306	34.5925	34.6115		33.9212	5	34.0226	33.8495	33.8199		34.4822	5	34.6888	34.7397	34.7308		34.4798	5
35.1538	4	34.8729	34.9094	34.8647		35.3699	4	35.3523	35.4692	35.4761		32.311	5	32.0625	31.9695	31.9893		35.3717	4	35.3271	35.2773	35.2198		32.4875	5	32.7249	32.9356	32.8967		35.0501	6	34.4378	34.6076	34.6236		33.9244	5	34.0202	33.847	33.8171		34.4743	5	34.6854	34.7355	34.727		34.4732	5
35.1596	4	34.8774	34.9129	34.8681		35.388	4	35.3578	35.4737	35.4806		32.3133	5	32.0597	31.9669	31.9876		35.3725	4	35.3323	35.2819	35.224		32.4794	5	32.72	32.9298	32.8929		35.0555	4	34.4449	34.6224	34.6355		33.9284	5	34.0179	33.8444	33.8143		34.4732	5	34.6819	34.7313	34.7232		34.4827	5
35.1723	4	34.8819	34.9164	34.8714		35.3896	4	35.3633	35.4782	35.485		32.3163	5	32.057	31.9643	31.986		35.3712	4	35.3375	35.2864	35.2282		32.4691	5	32.7151	32.9241	32.8891		35.0422	4	34.4521	34.637	34.6474		33.9256	5	34.0155	33.8419	33.8115		34.4744	5	34.6784	34.7271	34.7194		34.4971	5
35.1836	4	34.8863	34.9199	34.8748		35.3915	4	35.3688	35.4827	35.4895		32.3269	6	32.0642	31.9732	31.993		35.3799	4	35.3426	35.291	35.2323		32.4625	5	32.7102	32.9185	32.8853		35.0275	5	34.4485	34.6306	34.6422		33.9215	5	34.0132	33.8395	33.8088		34.4774	5	34.675	34.723	34.7156		34.5071	5
35.1907	4	34.8908	34.9233	34.8781		35.401	4	35.3743	35.4872	35.4938		32.337	6	32.0715	31.982	32		35.3894	4	35.3477	35.2956	35.2365		32.4632	5	32.7054	32.9129	32.8816		35.0071	5	34.4449	34.6243	34.6371		33.9205	5	34.0109	33.837	33.8061		34.4688	5	34.6715	34.7188	34.7119		34.513	5
35.1962	4	34.8952	34.9267	34.8815		35.4039	4	35.3798	35.4916	35.4982		32.3472	6	32.0787	31.9908	32.007		35.3936	4	35.3528	35.3001	35.2406		32.4636	5	32.7006	32.9074	32.8779		35.0042	5	34.4413	34.618	34.632		33.9159	5	34.0086	33.8346	33.8034		34.4643	5	34.6681	34.7147	34.7082		34.5203	5
35.2017	4	34.8996	34.9302	34.8848		35.4034	4	35.3852	35.496	35.5026		32.3583	6	32.0859	31.9995	32.014		35.3978	4	35.3579	35.3046	35.2447		32.4608	5	32.6959	32.9019	32.8742		34.9907	5	34.4377	34.6117	34.627		33.9129	5	34.0063	33.8321	33.8007		34.4638	5	34.6646	34.7107	34.7045		34.5226	5
35.212	4	34.904	34.9336	34.8881		35.4109	4	35.3906	35.5004	35.5069		32.3589	4	32.0931	32.0081	32.0209		35.4119	4	35.363	35.309	35.2488		32.4555	5	32.6912	32.8964	32.8706		34.9834	5	34.4341	34.6054	34.622		33.9153	5	34.004	33.8297	33.7981		34.4682	5	34.6612	34.7066	34.7008		34.5309	5
35.2249	4	34.9084	34.9369	34.8913		35.4129	4	35.396	35.5048	35.5112		32.3462	4	32.1002	32.0167	32.0278		35.4192	4	35.368	35.3135	35.2529		32.4521	5	32.6865	32.891	32.867		34.9782	5	34.4305	34.5991	34.617		33.9153	5	34.0017	33.8274	33.7954		34.4716	5	34.6578	34.7025	34.6971		34.5356	5
35.2286	4	34.9128	34.9403	34.8946		35.4119	4	35.4014	35.5091	35.5155		32.3312	5	32.0973	32.0137	32.0256		35.3952	4	35.3731	35.3179	35.257		32.4434	5	32.6818	32.8856	32.8635		34.9705	5	34.4269	34.5928	34.612		33.9173	5	33.9995	33.825	33.7928		34.4789	5	34.6544	34.6985	34.6935		34.5403	5
35.2221	4	34.9171	34.9437	34.8978		35.4221	4	35.4068	35.5134	35.5197		32.3187	4	32.1044	32.0222	32.0324		35.4441	4	35.3781	35.3224	35.261		32.4374	5	32.6772	32.8803	32.8599		34.9634	5	34.4233	34.5866	34.6071		33.9186	5	33.9972	33.8227	33.7902		34.4811	5	34.651	34.6945	34.6899		34.5365	5
35.2319	4	34.9215	34.947	34.901		35.4188	4	35.4121	35.5177	35.5239		32.3076	5	32.1014	32.0192	32.0302		35.426	4	35.3831	35.3267	35.2651		32.4319	5	32.6726	32.875	32.8565		34.9569	5	34.4198	34.5803	34.6022		33.9187	6	34.007	33.8344	33.8021		34.4819	5	34.6476	34.6905	34.6863		34.5309	5
35.2367	4	34.9258	34.9503	34.9042		35.423	4	35.4175	35.5219	35.5281		32.3066	5	32.0985	32.0161	32.0279		35.4384	4	35.388	35.3311	35.2691		32.4292	5	32.668	32.8697	32.853		34.9533	6	34.427	34.5956	34.6143		33.9189	6	34.0167	33.846	33.8139		34.4785	5	34.6442	34.6865	34.6827		34.5248	5
35.2126	4	34.9301	34.9536	34.9074		35.4413	4	35.4228	35.5261	35.5323		32.3048	5	32.0956	32.013	32.0257		35.4641	4	35.393	35.3355	35.2731		32.4271	5	32.6635	32.8645	32.8496		34.9467	6	34.4342	34.6106	34.6263		33.9252	6	34.0264	33.8576	33.8256		34.4689	5	34.6408	34.6826	34.6791		34.525	5
35.2296	4	34.9344	34.9569	34.9106		35.4509	4	35.4281	35.5303	35.5365		32.2949	5	32.0926	32.01	32.0235		35.4715	4	35.3979	35.3398	35.277		32.4267	5	32.659	32.8594	32.8462		34.9527	6	34.4414	34.6255	34.6382		33.9379	6	34.036	33.8691	33.8372		34.4662	5	34.6375	34.6786	34.6756		34.5297	5
35.2262	4	34.9387	34.9602	34.9137		35.4634	4	35.4334	35.5344	35.5406		32.3058	5	32.0897	32.007	32.0214		35.4844	4	35.4028	35.3441	35.281		32.4229	5	32.6545	32.8542	32.8429		34.952	6	34.4485	34.6401	34.65		33.9581	6	34.0456	33.8805	33.8487		34.4627	5	34.6341	34.6747	34.6721		34.5353	5
35.2306	4	34.9429	34.9634	34.9168		35.4784	4	35.4386	35.5386	35.5447		32.3039	5	32.0869	32.004	32.0193		35.499	4	35.4077	35.3484	35.285		32.4151	5	32.65	32.8491	32.8395		34.9479	6	34.4557	34.6545	34.6616		33.9867	6	34.0552	33.8918	33.8602		34.4589	5	34.6308	34.6708	34.6686		34.5375	5
35.2506	4	34.9472	34.9666	34.9199		35.4837	4	35.4439	35.5427	35.5488		32.2987	5	32.084	32.0011	32.0172		35.5174	4	35.4126	35.3526	35.2889		32.4089	5	32.6456	32.8441	32.8363		34.9534	6	34.4628	34.6688	34.6731		34.0184	6	34.0647	33.9031	33.8716		34.4632	4	34.6371	34.6799	34.6773		34.5368	5
35.261	4	34.9514	34.9699	34.923		35.4822	4	35.4491	35.5468	35.5529		32.298	5	32.0811	31.9981	32.0152		35.5413	4	35.4175	35.3569	35.2928		32.4054	5	32.6412	32.8391	32.833		34.9856	6	34.4699	34.6828	34.6844		34.0608	6	34.0742	33.9143	33.8829		34.458	4	34.6434	34.6889	34.686		34.5375	5
35.2601	4	34.9557	34.9731	34.9261		35.4812	4	35.4544	35.5508	35.557		32.3009	4	32.0883	32.0067	32.0221		35.562	4	35.4223	35.3611	35.2967		32.4054	5	32.6368	32.8341	32.8298		35.0202	6	34.477	34.6966	34.6957		34.1079	6	34.0837	33.9254	33.8941		34.4446	4	34.6497	34.6978	34.6946		34.5386	5
35.2568	4	34.9599	34.9762	34.9292		35.4909	4	35.4596	35.5548	35.5611		32.2891	5	32.0854	32.0037	32.02		35.5844	4	35.4271	35.3653	35.3006		32.4072	5	32.6325	32.8291	32.8266		35.0589	6	34.484	34.7102	34.7068		34.1517	6	34.0931	33.9365	33.9053		34.4363	5	34.6463	34.6938	34.6909		34.5456	5
35.2484	4	34.9641	34.9794	34.9322		35.4888	4	35.4647	35.5588	35.5651		32.2701	5	32.0826	32.0007	32.0179		35.5969	4	35.4319	35.3695	35.3044		32.4101	5	32.6281	32.8242	32.8234		35.0967	6	34.4911	34.7237	34.7177		34.1984	6	34.1025	33.9475	33.9164		34.4351	5	34.643	34.6898	34.6873		34.555	5
35.2273	4	34.9682	34.9826	34.9352		35.4858	4	35.4699	35.5628	35.5691		32.2558	5	32.0797	31.9978	32.0158		35.5585	4	35.4367	35.3736	35.3083		32.4136	4	32.6366	32.8318	32.8309		35.1249	6	34.4981	34.7369	34.7286		34.2398	6	34.1118	33.9584	33.9274		34.4381	5	34.6396	34.6858	34.6836		34.5615	5
35.2252	4	34.9724	34.9857	34.9383		35.4787	4	35.4751	35.5667	35.5731		32.2464	5	32.0769	31.9949	32.0138		35.6108	4	35.4415	35.3778	35.3121		32.4077	5	32.6322	32.8269	32.8277		35.1514	6	34.505	34.75	34.7393		34.2711	6	34.1211	33.9693	33.9384		34.4393	5	34.6362	34.6818	34.6801		34.5698	5
35.2291	4	34.9766	34.9888	34.9413		35.4776	4	35.4802	35.5706	35.5771		32.2441	5	32.074	31.992	32.0117		35.6173	4	35.4462	35.3819	35.316		32.4015	5	32.6279	32.822	32.8245		35.1781	6	34.512	34.7629	34.75		34.2969	6	34.1304	33.9801	33.9493		34.4374	5	34.6329	34.6778	34.6765		34.5717	5
35.2408	4	34.9807	34.9919	34.9442		35.4753	4	35.4853	35.5745	35.581		32.2437	5	32.0712	31.9891	32.0097		35.6219	4	35.451	35.386	35.3198		32.3991	5	32.6236	32.8171	32.8213		35.194	6	34.519	34.7755	34.7605		34.3157	6	34.1396	33.9908	33.9601		34.4385	5	34.6295	34.6739	34.6729		34.5731	5
35.2521	4	34.9848	34.995	34.9472		35.4688	4	35.4904	35.5784	35.585		32.247	5	32.0684	31.9862	32.0078		35.6405	4	35.4557	35.3901	35.3236		32.3932	5	32.6193	32.8123	32.8182		35.2072	6	34.5259	34.788	34.7708		34.3162	4	34.1488	34.0015	33.9708		34.4497	5	34.6262	34.6699	34.6694		34.5859	5
35.247	4	34.9889	34.9981	34.9501		35.472	4	35.4955	35.5822	35.5889		32.2544	5	32.0656	31.9834	32.0058		35.6697	4	35.4604	35.3941	35.3273		32.3912	5	32.6151	32.8075	32.8151		35.222	6	34.5328	34.8003	34.7811		34.2843	4	34.158	34.0121	33.9815		34.4585	5	34.6229	34.666	34.6659		34.5923	5
35.2694	4	34.993	35.0011	34.9531		35.4721	4	35.5006	35.5861	35.5928		32.2387	5	32.0629	31.9805	32.0038		35.682	4	35.465	35.3982	35.3311		32.3924	5	32.6109	32.8027	32.8121		35.2303	6	34.5397	34.8125	34.7912		34.2444	4	34.1671	34.0226	33.9921		34.4612	5	34.6196	34.6621	34.6625		34.5917	5
35.2745	4	34.9971	35.0042	34.956		35.4751	4	35.5057	35.5899	35.5967		32.2342	5	32.0601	31.9777	32.0019		35.6864	4	35.4697	35.4022	35.3348		32.3972	5	32.6067	32.798	32.809		35.2385	4	34.5465	34.8244	34.8013		34.2016	5	34.1638	34.0188	33.988		34.464	5	34.6162	34.6583	34.659		34.5964	5
35.2748	4	35.0012	35.0072	34.9589		35.48	4	35.5107	35.5936	35.6005		32.2372	5	32.0574	31.9749	32		35.6883	4	35.4743	35.4062	35.3386		32.4018	5	32.6026	32.7933	32.806		35.2373	4	34.5534	34.8362	34.8112		34.1643	5	34.1604	34.015	33.9839		34.4585	5	34.6129	34.6544	34.6556		34.5938	5
35.2748	4	35.0052	35.0102	34.9618		35.4744	4	35.5157	35.5974	35.6044		32.2496	5	32.0546	31.9722	31.9981		35.6921	4	35.4789	35.4102	35.3423		32.4069	5	32.5984	32.7886	32.8031		35.2078	4	34.5602	34.8478	34.821		34.1326	5	34.1571	34.0113	33.9798		34.4556	5	34.6097	34.6506	34.6522		34.5796	4
35.272	4	35.0093	35.0132	34.9646		35.4485	4	35.5207	35.6011	35.6082		32.2474	5	32.0519	31.9694	31.9962		35.7023	4	35.4835	35.4142	35.346		32.4099	5	32.5943	32.784	32.8001		35.1621	4	34.567	34.8593	34.8307		34.1077	5	34.1539	34.0076	33.9758		34.4541	5	34.6064	34.6468	34.6488		34.5738	5
35.2726	4	35.0133	35.0161	34.9675		35.44	4	35.5257	35.6048	35.612		32.2471	5	32.0492	31.9667	31.9944		35.7083	4	35.4881	35.4181	35.3497		32.4161	5	32.5903	32.7794	32.7972		35.1276	4	34.5738	34.8706	34.8403		34.0874	5	34.1506	34.0039	33.9718		34.4523	5	34.6031	34.643	34.6454		34.5652	5
35.259	4	35.0173	35.0191	34.9703		35.4367	4	35.5307	35.6085	35.6158		32.2644	5	32.0465	31.964	31.9925		35.7235	4	35.4927	35.422	35.3533		32.4143	5	32.5862	32.7748	32.7943		35.1056	5	34.57	34.8637	34.8338		34.0733	5	34.1474	34.0003	33.9679		34.4479	5	34.5998	34.6393	34.6421		34.5718	5
35.2539	4	35.0213	35.022	34.9732		35.4378	4	35.5357	35.6121	35.6196		32.2741	6	32.0538	31.9728	31.9995		35.7333	4	35.4972	35.426	35.357		32.4086	5	32.5822	32.7703	32.7915		35.0773	5	34.5662	34.8568	34.8273		34.0606	5	34.1442	33.9967	33.9639		34.4446	5	34.5966	34.6355	34.6387		34.5893	5
35.2664	4	35.0253	35.025	34.976		35.4364	4	35.5406	35.6157	35.6233		32.2712	6	32.0611	31.9816	32.0064		35.724	4	35.5018	35.4298	35.3606		32.4026	5	32.5782	32.7658	32.7886		35.0549	5	34.5624	34.85	34.8208		34.048	5	34.141	33.9931	33.96		34.4409	5	34.5933	34.6318	34.6354		34.608	5
35.2472	4	35.0293	35.0279	34.9787		35.431	4	35.5456	35.6193	35.627		32.3051	6	32.0683	31.9902	32.0134		35.701	4	35.5063	35.4337	35.3643		32.3936	5	32.5742	32.7613	32.7858		35.042	4	34.5692	34.8614	34.8305		34.0411	5	34.1379	33.9896	33.9562		34.4417	5	34.5901	34.6281	34.6322		34.6121	5
35.2612	4	35.0332	35.0308	34.9815		35.4288	4	35.5505	35.6229	35.6307		32.3142	6	32.0756	31.9989	32.0202		35.6714	5	35.4924	35.418	35.349		32.3848	5	32.5703	32.7569	32.7831		35.0349	4	34.576	34.8726	34.84		34.0359	5	34.1347	33.986	33.9523		34.4392	5	34.5868	34.6244	34.6289		34.6139	5
35.2592	4	35.0372	35.0337	34.9843		35.4217	4	35.5554	35.6264	35.6344		32.3413	6	32.0828	32.0074	32.0271		35.6419	5	35.4786	35.4024	35.3338		32.38	5	32.5664	32.7525	32.7803		35.033	4	34.5827	34.8837	34.8495		34.0292	5	34.1316	33.9825	33.9485		34.4412	5	34.5836	34.6208	34.6257		34.6148	5
35.2701	4	35.0411	35.0365	34.987		35.4135	4	35.5603	35.63	35.6381		32.3695	6	32.09	32.0159	32.0339		35.62	5	35.4649	35.387	35.3188		32.3828	5	32.5625	32.7481	32.7776		35.0255	4	34.5895	34.8946	34.8588		34.0242	5	34.1285	33.9791	33.9447		34.4433	5	34.5804	34.6171	34.6224		34.6218	5
35.2634	4	35.045	35.0394	34.9897		35.4023	4	35.5651	35.6335	35.6417		32.4052	6	32.0971	32.0244	32.0406		35.5886	5	35.4513	35.3717	35.304		32.3886	5	32.5586	32.7438	32.7749		35.0176	4	34.5962	34.9053	34.8681		34.0244	5	34.1254	33.9756	33.941		34.4477	5	34.5772	34.6135	34.6193		34.6266	5
35.1953	4	35.0489	35.0422	34.9925		35.4069	4	35.57	35.6369	35.6453		32.4854	6	32.1042	32.0328	32.0473		35.5704	4	35.456	35.3759	35.3079		32.3927	5	32.5547	32.7396	32.7722		34.9958	4	34.6029	34.9159	34.8772		34.0263	5	34.1223	33.9722	33.9373		34.4535	5	34.574	34.6099	34.6161		34.6269	5
35.2485	4	35.0528	35.045	34.9952		35.4092	4	35.5748	35.6404	35.6489		32.4916	6	32.1113	32.0411	32.054		35.5501	5	35.4425	35.3606	35.2932		32.3987	5	32.5509	32.7353	32.7695		34.9719	4	34.6095	34.9263	34.8863		34.0235	5	34.1193	33.9688	33.9336		34.4579	5	34.5708	34.6064	34.6129		34.628	5
35.2076	4	35.0567	35.0478	34.9978		35.4047	4	35.5797	35.6438	35.6525		32.5533	6	32.1184	32.0494	32.0607		35.5364	5	35.429	35.3456	35.2787		32.4014	5	32.5471	32.7311	32.7669		34.9518	4	34.6162	34.9366	34.8952		34.0126	5	34.1163	33.9655	33.9299		34.46	5	34.5676	34.6028	34.6098		34.6231	5
35.2079	4	35.0606	35.0506	35.0005		35.4059	4	35.5845	35.6472	35.6561		32.5826	6	32.1255	32.0576	32.0673		35.5312	5	35.4157	35.3306	35.2643		32.4032	5	32.5433	32.727	32.7643		34.9368	4	34.6228	34.9467	34.9041		34.007	5	34.1133	33.9622	33.9263		34.4623	5	34.5644	34.5992	34.6067		34.6164	5
35.1971	4	35.0644	35.0534	35.0032		35.4074	4	35.5893	35.6506	35.6596		32.5957	6	32.1325	32.0658	32.0739		35.5217	4	35.4205	35.335	35.2684		32.4061	5	32.5396	32.7229	32.7617		34.9357	4	34.6294	34.9567	34.9128		34.008	5	34.1103	33.9589	33.9227		34.4597	5	34.5613	34.5957	34.6036		34.6143	5
35.1835	4	35.0682	35.0561	35.0058		35.4172	4	35.594	35.654	35.6631		32.6151	6	32.1395	32.0739	32.0804		35.5109	5	35.4072	35.3202	35.2541		32.3963	4	32.5483	32.7309	32.7694		34.9479	4	34.636	34.9665	34.9215		34.0097	5	34.1073	33.9556	33.9192		34.4561	5	34.5581	34.5922	34.6005		34.6134	5
35.186	4	35.0721	35.0588	35.0085		35.4309	4	35.5988	35.6573	35.6666		32.6508	6	32.1465	32.0819	32.0869		35.4928	5	35.394	35.3055	35.24		32.3876	4	32.557	32.739	32.7771		34.9604	4	34.6426	34.9762	34.93		34.0093	5	34.1044	33.9523	33.9156		34.4504	5	34.555	34.5887	34.5974		34.6156	5
35.1985	4	35.0759	35.0616	35.0111		35.4442	4	35.6036	35.6606	35.6701		32.6846	6	32.1535	32.09	32.0934		35.4905	4	35.399	35.31	35.2443		32.3914	4	32.5657	32.7469	32.7847		34.9571	4	34.6491	34.9857	34.9385		34.0046	4	34.1137	33.9633	33.9267		34.4443	5	34.5518	34.5852	34.5944		34.6207	5
35.1743	4	35.0797	35.0643	35.0137		35.4483	4	35.6083	35.6639	35.6736		32.713	6	32.1604	32.0979	32.0998		35.4874	5	35.3858	35.2954	35.2303		32.3953	4	32.5744	32.7549	32.7923		34.9556	4	34.6556	34.9951	34.9468		33.9962	5	34.1108	33.96	33.9231		34.445	5	34.5487	34.5817	34.5914		34.6241	5
35.1961	4	35.0835	35.067	35.0163		35.4391	4	35.613	35.6672	35.677		32.7282	6	32.1673	32.1058	32.1062		35.481	5	35.3728	35.2808	35.2164		32.397	5	32.5704	32.7505	32.7894		34.9616	4	34.6621	35.0044	34.9551		33.9956	5	34.1078	33.9567	33.9195		34.4507	5	34.5455	34.5783	34.5883		34.6292	5
35.2109	4	35.0872	35.0696	35.0189		35.4283	4	35.6177	35.6704	35.6805		32.7605	6	32.1742	32.1137	32.1126		35.4701	5	35.3598	35.2665	35.2027		32.4	5	32.5665	32.7462	32.7865		34.9778	4	34.6686	35.0135	34.9632		34.0038	5	34.1048	33.9535	33.916		34.4553	5	34.5424	34.5749	34.5854		34.6291	5
35.2292	4	35.091	35.0723	35.0215		35.4298	4	35.6224	35.6737	35.6839		32.784	6	32.1811	32.1215	32.1189		35.4666	5	35.3469	35.2522	35.1891		32.3997	5	32.5626	32.7419	32.7837		34.9946	4	34.6751	35.0225	34.9713		34.0057	5	34.1019	33.9502	33.9125		34.4558	6	34.549	34.5845	34.5946		34.6286	5
35.2519	4	35.0948	35.075	35.024		35.422	4	35.6271	35.6769	35.6873		32.7928	6	32.1879	32.1293	32.1252		35.4613	5	35.3341	35.2381	35.1757		32.4019	5	32.5587	32.7377	32.7808		35.0104	4	34.6815	35.0314	34.9793		34.0108	5	34.099	33.947	33.909		34.4656	6	34.5556	34.5941	34.6037		34.6312	4
35.2677	4	35.0985	35.0776	35.0266		35.419	4	35.6318	35.6801	35.6906		32.8045	6	32.1948	32.137	32.1315		35.4583	5	35.3214	35.2241	35.1624		32.4053	5	32.5549	32.7334	32.778		35.0238	4	34.688	35.0401	34.9871		34.0192	5	34.0961	33.9439	33.9056		34.4844	6	34.5622	34.6036	34.6128		34.6238	4
35.2797	4	35.1022	35.0802	35.0291		35.4014	5	35.6239	35.6684	35.6775		32.8191	6	32.2016	32.1446	32.1377		35.4543	5	35.3088	35.2102	35.1493		32.4058	5	32.551	32.7293	32.7752		35.0143	4	34.6944	35.0487	34.9949		34.0263	5	34.0933	33.9407	33.9022		34.5011	6	34.5687	34.6131	34.6218		34.6131	4
35.2947	4	35.1059	35.0828	35.0316		35.3755	4	35.6286	35.6716	35.6809		32.8313	6	32.2083	32.1522	32.1439		35.4442	5	35.2963	35.1964	35.1363		32.4054	5	32.5472	32.7251	32.7724		35.0037	4	34.7008	35.0571	35.0026		34.0309	5	34.0904	33.9376	33.8988		34.5079	6	34.5752	34.6224	34.6308		34.6106	4
35.2998	4	35.1096	35.0854	35.0341		35.3667	4	35.6332	35.6748	35.6843		32.8418	6	32.2151	32.1598	32.15		35.4374	5	35.2839	35.1828	35.1234		32.4065	5	32.5435	32.721	32.7697		34.9968	4	34.7071	35.0655	35.0102		34.0334	5	34.0876	33.9345	33.8955		34.5071	6	34.5817	34.6318	34.6396		34.6192	4
35.3183	4	35.1133	35.088	35.0366		35.3732	4	35.6379	35.678	35.6877		32.8528	6	32.2218	32.1673	32.1562		35.4303	5	35.2715	35.1692	35.1107		32.4117	5	32.5397	32.717	32.7669		34.997	4	34.7135	35.0737	35.0178		34.0416	5	34.0848	33.9315	33.8921		34.5182	6	34.5882	34.641	34.6485		34.6309	4
35.335	4	35.117	35.0906	35.0391		35.3861	4	35.6425	35.6812	35.691		32.8576	6	32.2285	32.1747	32.1623		35.4308	5	35.2592	35.1558	35.0981		32.4157	5	32.536	32.713	32.7642		35.0042	4	34.7198	35.0818	35.0252		34.0465	5	34.082	33.9284	33.8888		34.5311	6	34.5947	34.6502	34.6572		34.6302	5
35.3355	4	35.1206	35.0931	35.0416		35.399	4	35.6471	35.6843	35.6944		32.8582	6	32.2352	32.1821	32.1683		35.4245	5	35.2471	35.1425	35.0857		32.4093	5	32.5323	32.709	32.7615		35.0128	4	34.7261	35.0898	35.0326		34.052	5	34.0792	33.9254	33.8856		34.5553	6	34.6011	34.6593	34.6659		34.6294	5
35.341	4	35.1243	35.0956	35.0441		35.4168	4	35.6517	35.6874	35.6977		32.8632	6	32.2419	32.1895	32.1744		35.4202	5	35.235	35.1293	35.0734		32.4012	5	32.5286	32.705	32.7589		35.0234	4	34.7324	35.0976	35.0398		34.054	6	34.0886	33.9365	33.8968		34.5895	6	34.6076	34.6683	34.6746		34.6274	5
35.3585	4	35.1279	35.0982	35.0465		35.434	4	35.6563	35.6905	35.701		32.8669	6	32.2485	32.1968	32.1804		35.4249	5	35.2229	35.1162	35.0612		32.3929	5	32.5249	32.7011	32.7562		35.0424	4	34.7387	35.1054	35.047		34.0566	6	34.098	33.9476	33.908		34.6346	4	34.614	34.6773	34.6831		34.6311	5
35.3718	4	35.1315	35.1007	35.049		35.445	4	35.6609	35.6936	35.7042		32.8755	6	32.2551	32.204	32.1863		35.4176	5	35.211	35.1033	35.0491		32.3894	5	32.5213	32.6972	32.7536		35.0631	4	34.7449	35.113	35.0541		34.0667	6	34.1074	33.9586	33.9192		34.6507	4	34.6204	34.6862	34.6916		34.6399	5
35.362	4	35.1351	35.1032	35.0514		35.4619	4	35.6654	35.6966	35.7075		32.8766	6	32.2617	32.2112	32.1923		35.4007	5	35.1992	35.0904	35.0372		32.3869	5	32.5177	32.6934	32.7511		35.0877	4	34.7511	35.1205	35.0611		34.0817	6	34.1167	33.9695	33.9302		34.6347	4	34.6267	34.695	34.7001		34.6451	5
35.3383	4	35.1387	35.1056	35.0539		35.4742	4	35.67	35.6996	35.7107		32.8763	4	32.2683	32.2184	32.1982		35.3924	5	35.1874	35.0777	35.0253		32.3771	5	32.5141	32.6896	32.7485		35.11	4	34.7574	35.1279	35.0681		34.0992	6	34.126	33.9804	33.9412		34.6113	4	34.6331	34.7038	34.7085		34.6511	5
35.3339	4	35.1423	35.1081	35.0563		35.4853	4	35.6745	35.7026	35.7139		32.8625	4	32.2748	32.2255	32.204		35.3878	5	35.1757	35.0651	35.0136		32.3752	5	32.5105	32.6858	32.7459		35.1252	4	34.7636	35.1352	35.0749		34.1233	6	34.1353	33.9911	33.9521		34.5887	4	34.6394	34.7125	34.7168		34.6495	5
35.3301	4	35.1459	35.1106	35.0587		35.4906	4	35.679	35.7056	35.7171		32.8226	4	32.2814	32.2325	32.2099		35.3923	5	35.1641	35.0525	35.002		32.3732	5	32.507	32.6821	32.7434		35.1437	4	34.7697	35.1424	35.0817		34.1547	6	34.1445	34.0019	33.9629		34.5682	4	34.6457	34.7211	34.7251		34.647	5
35.3241	4	35.1495	35.113	35.0611		35.5036	4	35.6835	35.7085	35.7203		32.7822	4	32.2879	32.2395	32.2157		35.387	4	35.1699	35.0584	35.0076		32.3716	5	32.5035	32.6784	32.7409		35.1592	4	34.7759	35.1495	35.0884		34.1901	6	34.1536	34.0125	33.9737		34.5495	5	34.6423	34.7168	34.7211		34.6382	5
35.3132	4	35.153	35.1155	35.0635		35.5033	4	35.688	35.7114	35.7234		32.7373	4	32.2943	32.2464	32.2215		35.3833	4	35.1757	35.0642	35.0131		32.366	5	32.5	32.6747	32.7383		35.1699	4	34.782	35.1565	35.095		34.2333	6	34.1628	34.0231	33.9844		34.5354	5	34.639	34.7125	34.7171		34.633	5
35.3086	4	35.1565	35.1179	35.0658		35.5061	4	35.6925	35.7144	35.7265		32.6916	4	32.3008	32.2533	32.2272		35.3825	5	35.1641	35.0517	35.0015		32.3648	5	32.4965	32.6711	32.7358		35.1762	4	34.7881	35.1633	35.1016		34.2777	6	34.1719	34.0336	33.995		34.5398	5	34.6356	34.7083	34.7132		34.6278	5
35.3044	4	35.1601	35.1203	35.0682		35.5101	4	35.6969	35.7172	35.7296		32.6537	4	32.3072	32.2602	32.233		35.3707	5	35.1526	35.0393	34.9901		32.367	5	32.4931	32.6675	32.7334		35.1751	4	34.7942	35.1701	35.108		34.3156	4	34.181	34.0441	34.0055		34.5409	5	34.6323	34.7041	34.7093		34.6283	5
35.2935	4	35.1636	35.1227	35.0706		35.5072	4	35.7014	35.7201	35.7327		32.6301	5	32.3033	32.255	32.2276		35.3721	5	35.1411	35.027	34.9788		32.3632	4	32.502	32.6758	32.7411		35.178	4	34.8003	35.1768	35.1144		34.3139	4	34.19	34.0545	34.016		34.5388	5	34.6289	34.6999	34.7055		34.6373	5
35.2779	4	35.1671	35.1251	35.0729		35.5039	4	35.7058	35.723	35.7358		32.5898	5	32.2994	32.2499	32.2223		35.3587	5	35.1298	35.0148	34.9676		32.3597	4	32.5109	32.6841	32.7488		35.1779	4	34.8064	35.1833	35.1208		34.2868	4	34.199	34.0648	34.0264		34.5332	5	34.6256	34.6957	34.7016		34.6442	5
35.29	4	35.1706	35.1275	35.0753		35.5053	4	35.7102	35.7258	35.7389		32.5639	5	32.2955	32.2448	32.2171		35.3543	5	35.1185	35.0027	34.9565		32.3532	5	32.5073	32.6803	32.7461		35.1691	4	34.8124	35.1898	35.127		34.2631	4	34.208	34.0751	34.0368		34.5333	5	34.6223	34.6915	34.6978		34.6371	5
35.2872	4	35.1741	35.1298	35.0776		35.5081	4	35.7146	35.7286	35.7419		32.5423	5	32.2916	32.2398	32.212		35.3582	4	35.1245	35.0089	34.9623		32.3474	5	32.5038	32.6766	32.7435		35.1573	4	34.8185	35.1962	35.1332		34.2382	4	34.2169	34.0853	34.047		34.5313	5	34.6189	34.6874	34.694		34.6261	5
35.2801	4	35.1775	35.1322	35.0799		35.5168	4	35.719	35.7314	35.7449		32.5312	5	32.2877	32.2348	32.2069		35.3625	4	35.1304	35.0149	34.9681		32.3418	5	32.5003	32.6729	32.7409		35.1458	4	34.8245	35.2025	35.1393		34.2196	5	34.2132	34.0811	34.0426		34.5314	5	34.6156	34.6832	34.6902		34.6227	5
35.2731	4	35.181	35.1345	35.0822		35.5186	4	35.7234	35.7342	35.7479		32.5308	5	32.2839	32.2298	32.2019		35.3718	4	35.1364	35.021	34.9739		32.3377	5	32.4968	32.6692	32.7383		35.1424	4	34.8304	35.2088	35.1453		34.2121	5	34.2096	34.077	34.0381		34.5397	5	34.6123	34.6791	34.6865		34.6212	5
35.2769	4	35.1844	35.1369	35.0845		35.5277	4	35.7277	35.737	35.7509		32.5241	5	32.28	32.2249	32.1969		35.3715	4	35.1423	35.027	34.9796		32.3366	5	32.4934	32.6656	32.7357		35.1376	4	34.8364	35.2149	35.1513		34.2125	5	34.206	34.0729	34.0337		34.5459	5	34.609	34.675	34.6828		34.6261	5
35.2728	4	35.1878	35.1392	35.0868		35.5447	4	35.7321	35.7398	35.7539		32.5045	5	32.2762	32.22	32.192		35.3714	4	35.1482	35.033	34.9853		32.3391	5	32.4899	32.662	32.7331		35.1443	4	34.8424	35.221	35.1572		34.2095	5	34.2024	34.0688	34.0293		34.5433	5	34.6058	34.671	34.6791		34.6323	5
35.2724	4	35.1913	35.1415	35.0891		35.5581	4	35.7364	35.7425	35.7569		32.491	5	32.2724	32.2151	32.1872		35.3794	5	35.1368	35.0208	34.9741		32.34	5	32.4865	32.6584	32.7306		35.1598	4	34.8483	35.227	35.1631		34.2065	5	34.1988	34.0648	34.025		34.5464	5	34.6025	34.6669	34.6754		34.6394	5
35.2703	4	35.1947	35.1438	35.0914		35.5653	4	35.7407	35.7453	35.7598		32.4783	4	32.279	32.2222	32.1931		35.3743	5	35.1254	35.0086	34.963		32.344	5	32.4831	32.6548	32.728		35.1714	4	34.8542	35.2329	35.1689		34.1962	5	34.1953	34.0608	34.0206		34.5527	4	34.6089	34.6758	34.684		34.638	5
35.2706	4	35.1981	35.1461	35.0936		35.5842	4	35.745	35.748	35.7627		32.4632	5	32.2752	32.2174	32.1883		35.3721	5	35.1142	34.9966	34.952		32.3464	5	32.4798	32.6513	32.7255		35.1744	4	34.8601	35.2387	35.1746		34.1887	5	34.1918	34.0568	34.0164		34.5339	5	34.6056	34.6717	34.6803		34.6291	5
35.2698	4	35.2014	35.1484	35.0959		35.5933	4	35.7493	35.7507	35.7657		32.4602	5	32.2714	32.2125	32.1835		35.362	5	35.103	34.9847	34.9412		32.3491	5	32.4764	32.6478	32.7231		35.1834	4	34.866	35.2444	35.1803		34.1786	5	34.1883	34.0529	34.0121		34.5251	5	34.6024	34.6677	34.6766		34.6226	5
35.2606	4	35.2048	35.1507	35.0981		35.6058	4	35.7536	35.7534	35.7686		32.455	5	32.2676	32.2077	32.1788		35.3624	5	35.0919	34.9729	34.9305		32.3544	5	32.4731	32.6443	32.7206		35.1851	4	34.8719	35.2501	35.1859		34.1706	5	34.1848	34.049	34.0079		34.5337	5	34.5991	34.6636	34.6729		34.615	5
35.2498	4	35.2082	35.1529	35.1003		35.6128	4	35.7579	35.7561	35.7714		32.4511	5	32.2639	32.203	32.1742		35.3562	5	35.0809	34.9612	34.9199		32.3572	5	32.4698	32.6408	32.7182		35.1866	4	34.8777	35.2556	35.1915		34.1643	5	34.1813	34.0451	34.0038		34.5389	4	34.6055	34.6725	34.6814		34.6181	5
35.241	4	35.2115	35.1552	35.1026		35.617	4	35.7621	35.7587	35.7743		32.4433	5	32.2601	32.1982	32.1696		35.34	5	35.0699	34.9496	34.9094		32.3555	5	32.4665	32.6374	32.7158		35.1925	4	34.8835	35.2611	35.197		34.1562	5	34.1779	34.0413	33.9996		34.542	4	34.6119	34.6814	34.6899		34.624	5
35.2281	4	35.2149	35.1574	35.1048		35.6195	4	35.7664	35.7614	35.7772		32.4389	5	32.2564	32.1936	32.1651		35.3318	5	35.059	34.9381	34.899		32.3503	5	32.4632	32.634	32.7134		35.1961	4	34.8893	35.2664	35.2024		34.1419	5	34.1745	34.0375	33.9955		34.531	5	34.6086	34.6772	34.6861		34.6316	5
35.2192	4	35.2182	35.1596	35.107		35.6222	4	35.7706	35.764	35.78		32.429	5	32.2527	32.1889	32.1607		35.3181	5	35.0482	34.9267	34.8887		32.3515	5	32.46	32.6306	32.7111		35.1936	4	34.8951	35.2717	35.2078		34.1311	5	34.1711	34.0337	33.9915		34.5331	5	34.6054	34.6731	34.6824		34.6319	5
35.2118	4	35.2215	35.1619	35.1092		35.6221	4	35.7748	35.7667	35.7828		32.4221	4	32.2593	32.1962	32.1667		35.3289	5	35.0375	34.9153	34.8786		32.3542	5	32.4568	32.6272	32.7088		35.1916	4	34.9009	35.2769	35.2131		34.1302	5	34.1678	34.0299	33.9874		34.5328	5	34.6021	34.669	34.6786		34.6412	5
35.2038	4	35.2248	35.1641	35.1113		35.6333	4	35.779	35.7693	35.7856		32.4113	5	32.2556	32.1915	32.1622		35.3304	5	35.0269	34.9041	34.8685		32.3542	5	32.4536	32.6239	32.7065		35.184	4	34.9066	35.2821	35.2183		34.1241	5	34.1644	34.0262	33.9834		34.5406	5	34.5988	34.6649	34.6749		34.6504	5
35.2022	4	35.2281	35.1663	35.1135		35.6361	4	35.7832	35.7719	35.7884		32.3952	5	32.2519	32.1868	32.1578		35.3347	5	35.0163	34.893	34.8586		32.3543	5	32.4504	32.6206	32.7043		35.18	4	34.9124	35.2872	35.2235		34.12	5	34.1611	34.0226	33.9795		34.5418	5	34.5956	34.6609	34.6712		34.6582	5
35.1959	4	35.2314	35.1685	35.1157		35.6321	4	35.7874	35.7745	35.7911		32.3795	5	32.2482	32.1822	32.1535		35.3371	5	35.0058	34.882	34.8487		32.3613	6	32.4595	32.6291	32.7122		35.1789	4	34.9181	35.2922	35.2286		34.1194	5	34.1578	34.0189	33.9756		34.5471	5	34.5923	34.6569	34.6675		34.6655	6
35.1835	4	35.2346	35.1706	35.1178		35.6296	4	35.7915	35.7771	35.7939		32.3754	5	32.2446	32.1776	32.1492		35.318	5	34.9953	34.8711	34.839		32.3704	6	32.4685	32.6375	32.72		35.1709	4	34.9238	35.2971	35.2337		34.1229	5	34.1545	34.0153	33.9717		34.5545	5	34.5891	34.6529	34.6639		34.6776	6
35.1827	4	35.2379	35.1728	35.12		35.6312	4	35.7957	35.7796	35.7966		32.3775	5	32.2409	32.1731	32.1449		35.3153	5	34.985	34.8602	34.8294		32.3802	6	32.4775	32.6459	32.7278		35.1622	4	34.9295	35.302	35.2387		34.1216	5	34.1513	34.0117	33.9678		34.5507	5	34.5859	34.6489	34.6603		34.7092	6
35.1726	4	35.2412	35.175	35.1221		35.6295	4	35.7998	35.7822	35.7994		32.3799	5	32.2373	32.1686	32.1407		35.3044	5	34.9747	34.8495	34.8199		32.3858	6	32.4865	32.6543	32.7355		35.1741	4	34.9352	35.3067	35.2436		34.1176	5	34.148	34.0082	33.964		34.5602	5	34.5826	34.6449	34.6566		34.768	6
35.1684	4	35.2444	35.1771	35.1242		35.617	4	35.8039	35.7847	35.8021		32.3797	4	32.244	32.176	32.1469		35.302	4	34.9812	34.8564	34.8264		32.4004	6	32.4954	32.6626	32.7432		35.1845	4	34.9408	35.3114	35.2485		34.113	5	34.1448	34.0046	33.9602		34.5639	5	34.5794	34.641	34.6531		34.8043	6
35.1605	4	35.2476	35.1792	35.1264		35.6096	4	35.808	35.7872	35.8048		32.3797	5	32.2403	32.1714	32.1427		35.284	5	34.971	34.8457	34.817		32.4263	6	32.5043	32.6709	32.7509		35.1714	4	34.9464	35.3161	35.2534		34.1082	5	34.1416	34.0011	33.9565		34.571	5	34.5762	34.637	34.6495		34.8501	4
35.1562	4	35.2508	35.1814	35.1285		35.5995	4	35.8121	35.7897	35.8075		32.3698	5	32.2367	32.1669	32.1385		35.2771	5	34.9608	34.8351	34.8076		32.4629	6	32.5132	32.6791	32.7585		35.1727	4	34.9521	35.3206	35.2581		34.103	5	34.1385	33.9977	33.9527		34.5694	5	34.573	34.6331	34.6459		34.8933	4
35.147	4	35.254	35.1835	35.1306		35.5902	4	35.8162	35.7922	35.8101		32.3591	5	32.2331	32.1624	32.1345		35.2806	5	34.9507	34.8246	34.7983		32.496	6	32.522	32.6873	32.7661		35.1787	4	34.9577	35.3251	35.2629		34.0975	5	34.1353	33.9943	33.9491		34.5729	5	34.5698	34.6293	34.6424		34.8934	4
35.1382	4	35.2572	35.1856	35.1327		35.5908	4	35.8203	35.7947	35.8128		32.3523	5	32.2295	32.158	32.1304		35.2752	5	34.9406	34.8141	34.7892		32.5367	6	32.5308	32.6954	32.7737		35.1823	4	34.9632	35.3295	35.2675		34.0944	5	34.1322	33.9908	33.9454		34.5675	5	34.5666	34.6254	34.6389		34.8797	4
35.1217	4	35.2604	35.1877	35.1348		35.6058	4	35.8243	35.7972	35.8154		32.3476	5	32.226	32.1536	32.1264		35.2765	5	34.9306	34.8038	34.7801		32.5683	6	32.5396	32.7034	32.7812		35.1878	4	34.9688	35.3339	35.2721		34.0917	5	34.1291	33.9875	33.9418		34.5605	5	34.5635	34.6215	34.6354		34.8606	4
35.0991	4	35.2636	35.1897	35.1368		35.6141	4	35.8284	35.7996	35.818		32.3486	5	32.2224	32.1492	32.1225		35.2807	5	34.9207	34.7935	34.7711		32.6071	6	32.5483	32.7115	32.7887		35.1843	4	34.9743	35.3382	35.2767		34.0969	5	34.126	33.9841	33.9382		34.5627	5	34.5603	34.6177	34.6319		34.8375	4
35.0795	4	35.2667	35.1918	35.1389		35.6052	4	35.8324	35.8021	35.8206		32.3532	5	32.2189	32.1449	32.1187		35.2866	5	34.9109	34.7834	34.7623		32.6333	4	32.5571	32.7194	32.7961		35.1801	4	34.9799	35.3424	35.2812		34.0975	5	34.123	33.9808	33.9346		34.5546	5	34.5571	34.6139	34.6285		34.8163	4
35.0783	4	35.2699	35.1938	35.141		35.5968	4	35.8364	35.8045	35.8232		32.3545	5	32.2154	32.1406	32.1148		35.2888	5	34.9011	34.7733	34.7535		32.6292	4	32.5657	32.7274	32.8035		35.1797	4	34.9854	35.3465	35.2857		34.0958	5	34.1199	33.9775	33.9311		34.5517	5	34.554	34.6101	34.625		34.8082	4
35.0893	4	35.273	35.1959	35.143		35.5838	4	35.8404	35.807	35.8258		32.3509	5	32.2119	32.1363	32.1111		35.276	4	34.9079	34.7806	34.7604		32.6127	4	32.5744	32.7353	32.8109		35.1791	4	34.9909	35.3506	35.2901		34.0911	5	34.1169	33.9743	33.9276		34.5542	5	34.5508	34.6064	34.6216		34.8055	5
35.1139	4	35.2762	35.1979	35.1451		35.581	4	35.8444	35.8094	35.8283		32.3505	5	32.2084	32.1321	32.1074		35.2604	4	34.9147	34.7879	34.7673		32.5917	4	32.583	32.7431	32.8183		35.1792	4	34.9964	35.3546	35.2945		34.0813	5	34.1139	33.971	33.9241		34.5551	5	34.5477	34.6026	34.6182		34.7944	5
35.1332	4	35.2793	35.1999	35.1471		35.5785	4	35.8484	35.8118	35.8309		32.3589	5	32.2049	32.1279	32.1037		35.2608	4	34.9215	34.7951	34.7742		32.5695	4	32.5916	32.7509	32.8256		35.1842	4	35.0018	35.3585	35.2989		34.0817	5	34.1109	33.9678	33.9207		34.5568	5	34.5446	34.5989	34.6149		34.7906	5
35.1591	4	35.2824	35.2019	35.1491		35.5826	4	35.8524	35.8142	35.8334		32.3549	5	32.2015	32.1237	32.1001		35.244	5	34.9116	34.785	34.7653		32.5487	5	32.5875	32.7463	32.8222		35.1766	4	35.0073	35.3624	35.3031		34.079	5	34.1079	33.9647	33.9173		34.5536	5	34.5415	34.5952	34.6115		34.788	5
35.1824	4	35.2855	35.2039	35.1511		35.5895	4	35.8563	35.8166	35.8359		32.3389	5	32.198	32.1196	32.0965		35.2482	5	34.9018	34.7749	34.7565		32.5296	5	32.5835	32.7417	32.8188		35.1684	4	35.0127	35.3662	35.3074		34.076	5	34.105	33.9615	33.9139		34.5553	5	34.5384	34.5915	34.6082		34.7845	5
35.1987	4	35.2886	35.2058	35.1531		35.6051	4	35.8603	35.8189	35.8384		32.3297	5	32.1946	32.1155	32.093		35.2429	5	34.8921	34.7649	34.7477		32.5154	5	32.5795	32.7371	32.8155		35.1615	4	35.0181	35.3699	35.3116		34.0783	5	34.1021	33.9584	33.9106		34.5661	5	34.5353	34.5878	34.6048		34.7842	5
35.2048	4	35.2916	35.2078	35.1551		35.6227	4	35.8642	35.8213	35.8409		32.3245	5	32.1912	32.1114	32.0896		35.2476	5	34.8825	34.755	34.7391		32.5005	5	32.5755	32.7326	32.8122		35.1676	4	35.0235	35.3736	35.3157		34.0806	5	34.0992	33.9553	33.9073		34.5703	5	34.5322	34.5842	34.6015		34.7787	5
35.2076	4	35.2947	35.2097	35.1571		35.6347	4	35.8681	35.8236	35.8434		32.3183	5	32.1878	32.1073	32.0862		35.2468	5	34.8729	34.7452	34.7306		32.4902	5	32.5715	32.7281	32.8089		35.1706	4	35.0289	35.3772	35.3198		34.0852	5	34.0963	33.9522	33.904		34.5712	5	34.5291	34.5805	34.5982		34.7715	5
35.2165	4	35.2977	35.2116	35.1591		35.6427	4	35.872	35.826	35.8458		32.3113	5	32.1845	32.1033	32.0828		35.2515	5	34.8634	34.7355	34.7221		32.4822	5	32.5676	32.7236	32.8057		35.1751	4	35.0343	35.3808	35.3238		34.0926	5	34.0934	33.9492	33.9007		34.568	5	34.526	34.5769	34.595		34.7739	5
35.2277	4	35.3008	35.2135	35.1611		35.6559	4	35.8759	35.8283	35.8482		32.3184	5	32.1811	32.0993	32.0795		35.2465	5	34.8539	34.7258	34.7137		32.4719	5	32.5637	32.7192	32.8025		35.1743	4	35.0396	35.3843	35.3278		34.097	5	34.0906	33.9462	33.8975		34.5729	5	34.5229	34.5733	34.5917		34.7774	5
35.2216	4	35.3038	35.2154	35.163		35.6668	4	35.8798	35.8306	35.8507		32.3302	5	32.1778	32.0954	32.0762		35.239	4	34.8609	34.7334	34.7208		32.4602	5	32.5598	32.7148	32.7993		35.1741	4	35.0449	35.3877	35.3318		34.0929	5	34.0877	33.9432	33.8943		34.5753	5	34.5199	34.5698	34.5885		34.7747	5
35.22	4	35.3068	35.2173	35.165		35.676	4	35.8837	35.8329	35.8531		32.3388	5	32.1745	32.0914	32.073		35.2283	5	34.8515	34.7238	34.7125		32.4538	6	32.5685	32.7227	32.8067		35.1849	4	35.0502	35.391	35.3357		34.0938	5	34.0849	33.9402	33.8912		34.5758	5	34.5168	34.5662	34.5853		34.7698	5
35.2153	4	35.3099	35.2192	35.167		35.686	4	35.8876	35.8352	35.8555		32.3453	5	32.1712	32.0875	32.0698		35.2181	5	34.8421	34.7142	34.7041		32.4526	6	32.5771	32.7306	32.8141		35.1781	4	35.0555	35.3943	35.3395		34.0956	5	34.0821	33.9373	33.888		34.5688	5	34.5138	34.5627	34.5821		34.7651	5
35.2201	4	35.3129	35.221	35.1689		35.6968	4	35.8914	35.8375	35.8579		32.3513	5	32.1679	32.0837	32.0667		35.2157	5	34.8328	34.7048	34.6959		32.453	6	32.5857	32.7384	32.8214		35.1756	4	35.0608	35.3976	35.3434		34.0944	5	34.0793	33.9344	33.8849		34.5655	6	34.5205	34.5723	34.5911		34.7566	5
35.2269	4	35.3159	35.2229	35.1708		35.6963	4	35.8952	35.8397	35.8603		32.3579	5	32.1646	32.0798	32.0636		35.2132	5	34.8236	34.6954	34.6877		32.4685	6	32.5943	32.7461	32.8287		35.1721	4	35.0661	35.4008	35.3472		34.0949	5	34.0766	33.9315	33.8818		34.5617	6	34.5271	34.5817	34.6001		34.752	5
35.2273	4	35.3188	35.2247	35.1727		35.6958	4	35.8991	35.842	35.8626		32.3662	5	32.1614	32.076	32.0605		35.2105	5	34.8144	34.6861	34.6797		32.4811	6	32.6028	32.7539	32.836		35.1628	4	35.0713	35.4039	35.3509		34.0975	5	34.0738	33.9286	33.8788		34.5637	6	34.5338	34.5912	34.609		34.7463	5
35.2189	4	35.3218	35.2266	35.1747		35.6957	4	35.9029	35.8442	35.865		32.3727	5	32.1581	32.0722	32.0575		35.2166	5	34.8053	34.6769	34.6717		32.4782	4	32.6113	32.7616	32.8432		35.1532	4	35.0766	35.407	35.3546		34.1014	6	34.0833	33.9399	33.8902		34.5725	6	34.5404	34.6005	34.6178		34.7455	5
35.1963	4	35.3248	35.2284	35.1766		35.6935	4	35.9067	35.8465	35.8673		32.3744	5	32.1549	32.0685	32.0545		35.211	5	34.7963	34.6678	34.6638		32.4676	4	32.6198	32.7692	32.8504		35.1485	4	35.0818	35.41	35.3583		34.1175	6	34.0927	33.9511	33.9016		34.5924	6	34.547	34.6098	34.6266		34.7507	5
35.173	4	35.3277	35.2302	35.1785		35.6974	4	35.9104	35.8487	35.8696		32.373	5	32.1517	32.0647	32.0516		35.205	5	34.7873	34.6588	34.656		32.4573	4	32.6283	32.7768	32.8576		35.1452	4	35.087	35.413	35.3619		34.1372	6	34.1021	33.9622	33.9129		34.6213	6	34.5536	34.619	34.6353		34.745	4
35.16	4	35.3307	35.232	35.1803		35.7008	4	35.9142	35.8509	35.8719		32.3772	5	32.1485	32.061	32.0487		35.2032	5	34.7784	34.6498	34.6482		32.4435	4	32.6367	32.7844	32.8647		35.1409	4	35.0922	35.4159	35.3654		34.1568	6	34.1114	33.9732	33.9241		34.6493	6	34.5602	34.6282	34.6439		34.736	5
35.1509	4	35.3336	35.2338	35.1822		35.7065	4	35.918	35.8531	35.8742		32.3875	5	32.1454	32.0574	32.0458		35.1993	5	34.7695	34.6409	34.6406		32.4302	4	32.6451	32.7919	32.8718		35.1383	4	35.0973	35.4187	35.369		34.1807	6	34.1207	33.9842	33.9353		34.6826	6	34.5667	34.6373	34.6525		34.7143	5
35.1328	4	35.3365	35.2355	35.1841		35.7142	4	35.9217	35.8552	35.8765		32.4059	5	32.1422	32.0537	32.043		35.1936	5	34.7607	34.6321	34.633		32.4195	5	32.6407	32.7868	32.8679		35.1372	4	35.1025	35.4215	35.3725		34.205	6	34.13	33.9951	33.9464		34.722	6	34.5732	34.6463	34.661		34.7064	5
35.1221	4	35.3394	35.2373	35.186		35.7124	4	35.9255	35.8574	35.8788		32.4354	5	32.1391	32.0501	32.0402		35.1873	5	34.752	34.6234	34.6255		32.4119	5	32.6363	32.7818	32.8641		35.1407	4	35.1076	35.4243	35.3759		34.2404	6	34.1393	34.006	33.9574		34.7522	6	34.5797	34.6552	34.6695		34.71	5
35.1079	4	35.3423	35.2391	35.1878		35.7085	4	35.9292	35.8595	35.881		32.4542	4	32.146	32.0582	32.0469		35.174	5	34.7433	34.6147	34.618		32.4112	5	32.6319	32.7768	32.8603		35.1504	4	35.1128	35.427	35.3793		34.2714	6	34.1484	34.0167	33.9684		34.7875	6	34.5862	34.6641	34.6779		34.7135	5
35.096	4	35.3452	35.2408	35.1897		35.7162	4	35.9329	35.8617	35.8832		32.4662	4	32.153	32.0662	32.0535		35.1651	5	34.7347	34.6061	34.6107		32.4148	5	32.6276	32.7718	32.8565		35.1622	4	35.1179	35.4297	35.3827		34.3044	6	34.1576	34.0275	33.9792		34.813	4	34.5927	34.673	34.6862		34.7208	5
35.0824	4	35.3481	35.2425	35.1915		35.7244	4	35.9366	35.8638	35.8855		32.4457	5	32.1498	32.0624	32.0506		35.1621	5	34.7261	34.5976	34.6034		32.4168	5	32.6233	32.7669	32.8528		35.1708	4	35.123	35.4324	35.3861		34.3422	6	34.1667	34.0381	33.99		34.8006	4	34.5991	34.6817	34.6945		34.7201	5
35.0755	4	35.351	35.2443	35.1933		35.7335	4	35.9403	35.8659	35.8877		32.4202	5	32.1466	32.0587	32.0477		35.1557	5	34.7176	34.5892	34.5962		32.4186	4	32.6318	32.7745	32.8599		35.1709	4	35.128	35.435	35.3894		34.3804	6	34.1758	34.0487	34.0008		34.7633	4	34.6056	34.6904	34.7028		34.7259	5
35.0745	4	35.3538	35.246	35.1951		35.7393	4	35.944	35.8679	35.8899		32.4132	5	32.1435	32.055	32.0449		35.142	5	34.7092	34.5808	34.5891		32.409	4	32.6402	32.7821	32.8671		35.167	4	35.1331	35.4375	35.3927		34.408	6	34.1849	34.0592	34.0114		34.7283	4	34.612	34.6991	34.7109		34.727	5
35.071	4	35.3567	35.2477	35.1969		35.744	4	35.9477	35.87	35.8921		32.401	5	32.1403	32.0514	32.0421		35.1369	5	34.7008	34.5725	34.582		32.4003	4	32.6485	32.7896	32.8741		35.1664	4	35.1381	35.44	35.3959		34.4287	6	34.1939	34.0696	34.022		34.6938	4	34.6184	34.7077	34.719		34.7251	5
35.066	4	35.3595	35.2494	35.1987		35.7425	4	35.9513	35.872	35.8942		32.3926	5	32.1372	32.0477	32.0394		35.1416	4	34.7084	34.5809	34.5898		32.3956	4	32.6569	32.7971	32.8812		35.1739	4	35.1432	35.4425	35.3992		34.4437	6	34.2029	34.08	34.0326		34.6695	5	34.6151	34.7034	34.7149		34.7273	5
35.0641	4	35.3624	35.2511	35.2005		35.7472	4	35.955	35.874	35.8964		32.3899	5	32.1341	32.0441	32.0367		35.1278	4	34.7159	34.5893	34.5975		32.3938	4	32.6652	32.8045	32.8882		35.1819	4	35.1482	35.4449	35.4024		34.4602	6	34.2118	34.0903	34.043		34.6554	5	34.6118	34.6991	34.7107		34.7276	5
35.066	4	35.3652	35.2528	35.2023		35.7546	4	35.9586	35.876	35.8985		32.3791	5	32.131	32.0406	32.034		35.1143	4	34.7235	34.5976	34.6052		32.3944	4	32.6735	32.812	32.8952		35.189	4	35.1532	35.4473	35.4056		34.4676	4	34.2208	34.1006	34.0534		34.6376	5	34.6085	34.6948	34.7066		34.7295	6
35.08	4	35.368	35.2544	35.2041		35.7519	4	35.9622	35.878	35.9007		32.3688	5	32.1279	32.037	32.0315		35.1077	4	34.731	34.6058	34.6128		32.4003	4	32.6817	32.8193	32.9021		35.1958	4	35.1582	35.4496	35.4087		34.4614	4	34.2296	34.1108	34.0637		34.6294	5	34.6052	34.6906	34.7025		34.7366	6
35.0949	4	35.3708	35.2561	35.2059		35.7596	4	35.9658	35.88	35.9028		32.3611	5	32.1248	32.0335	32.0289		35.1025	4	34.7384	34.614	34.6204		32.4151	4	32.6899	32.8267	32.909		35.2007	4	35.1631	35.4518	35.4119		34.4202	4	34.2385	34.1209	34.074		34.6241	5	34.6019	34.6863	34.6985		34.7616	6
35.1005	4	35.3736	35.2577	35.2076		35.7505	4	35.9694	35.8819	35.9049		32.3518	5	32.1217	32.03	32.0264		35.0927	4	34.7459	34.6222	34.628		32.4283	5	32.6852	32.8213	32.9048		35.2022	4	35.1681	35.4541	35.415		34.3799	5	34.2347	34.1166	34.0694		34.6179	5	34.5987	34.6821	34.6944		34.8082	6
35.1009	4	35.3764	35.2594	35.2094		35.7353	4	35.973	35.8839	35.907		32.3398	5	32.1187	32.0265	32.024		35.0832	4	34.7533	34.6303	34.6355		32.4395	5	32.6806	32.8159	32.9005		35.2048	4	35.173	35.4563	35.418		34.3368	5	34.2309	34.1124	34.065		34.606	5	34.5954	34.678	34.6904		34.8625	6
35.0944	4	35.3792	35.261	35.2111		35.7215	4	35.9766	35.8858	35.9091		32.3331	5	32.1157	32.0231	32.0215		35.0887	4	34.7607	34.6384	34.643		32.4436	5	32.676	32.8106	32.8963		35.2005	4	35.1779	35.4584	35.4211		34.2971	5	34.2272	34.1082	34.0605		34.599	5	34.5922	34.6738	34.6864		34.9163	6
35.0913	4	35.3819	35.2627	35.2128		35.7071	4	35.9802	35.8877	35.9111		32.3295	5	32.1127	32.0197	32.0192		35.0869	5	34.752	34.6297	34.6353		32.4424	5	32.6714	32.8053	32.8922		35.2024	4	35.1828	35.4605	35.4241		34.266	5	34.2234	34.104	34.0561		34.5894	5	34.5889	34.6697	34.6825		34.9688	6
35.0933	4	35.3847	35.2643	35.2146		35.7046	4	35.9837	35.8896	35.9132		32.3291	5	32.1097	32.0163	32.0168		35.0762	5	34.7433	34.621	34.6277		32.4544	5	32.6668	32.8	32.888		35.2041	4	35.1877	35.4625	35.4271		34.2364	5	34.2197	34.0998	34.0517		34.5855	5	34.5857	34.6656	34.6785		35.0253	6
35.1007	4	35.3874	35.2659	35.2163		35.7146	4	35.9873	35.8915	35.9153		32.3332	5	32.1067	32.0129	32.0146		35.0677	5	34.7347	34.6124	34.6202		32.4584	5	32.6623	32.7949	32.884		35.2095	4	35.1926	35.4646	35.43		34.2116	5	34.216	34.0957	34.0474		34.5779	5	34.5825	34.6615	34.6746		35.0627	4
35.1126	4	35.3902	35.2675	35.218		35.7237	4	35.9908	35.8934	35.9173		32.3377	5	32.1037	32.0096	32.0123		35.0665	5	34.7261	34.6039	34.6127		32.46	5	32.6578	32.7897	32.8799		35.21	4	35.1975	35.4665	35.4329		34.1887	5	34.2124	34.0917	34.0431		34.5735	5	34.5793	34.6574	34.6707		35.0635	4
35.125	4	35.3929	35.2691	35.2197		35.7396	4	35.9943	35.8952	35.9193		32.3335	5	32.1007	32.0063	32.0101		35.0548	5	34.7176	34.5954	34.6053		32.4653	5	32.6533	32.7846	32.8759		35.1989	4	35.2023	35.4685	35.4358		34.165	5	34.2087	34.0876	34.0388		34.5649	5	34.5761	34.6533	34.6669		35.0406	4
35.1278	4	35.3956	35.2707	35.2214		35.7527	4	35.9978	35.8971	35.9213		32.3303	4	32.1079	32.0146	32.017		35.0507	5	34.7092	34.587	34.5979		32.4657	5	32.6488	32.7796	32.8719		35.1955	4	35.2071	35.4704	35.4387		34.1461	5	34.2051	34.0836	34.0346		34.5613	5	34.5729	34.6493	34.663		35.0067	4
35.1365	4	35.3983	35.2723	35.2231		35.7607	4	36.0013	35.8989	35.9233		32.3183	5	32.1049	32.0112	32.0147		35.0425	5	34.7008	34.5787	34.5907		32.4632	5	32.6444	32.7746	32.868		35.1921	4	35.212	35.4722	35.4415		34.1368	5	34.2015	34.0796	34.0304		34.5611	5	34.5697	34.6453	34.6592		34.9755	4
35.1498	4	35.401	35.2738	35.2248		35.7621	4	36.0048	35.9007	35.9253		32.3068	5	32.1019	32.0079	32.0125		35.0294	5	34.6924	34.5705	34.5835		32.4613	5	32.64	32.7696	32.8641		35.1995	4	35.2168	35.474	35.4443		34.1296	5	34.198	34.0757	34.0263		34.565	4	34.5762	34.6542	34.6676		34.9396	5
35.1612	4	35.4037	35.2754	35.2264		35.7651	4	36.0083	35.9025	35.9273		32.3087	5	32.099	32.0046	32.0104		35.0178	5	34.6842	34.5624	34.5763		32.4592	5	32.6357	32.7648	32.8602		35.22	4	35.2216	35.4758	35.4471		34.1246	5	34.1944	34.0718	34.0222		34.5704	4	34.5827	34.6631	34.6759		34.9062	5
35.1749	4	35.4064	35.277	35.2281		35.7692	4	36.0118	35.9043	35.9292		32.3113	5	32.096	32.0013	32.0082		35.0079	5	34.676	34.5543	34.5692		32.4596	5	32.6313	32.7599	32.8563		35.2281	4	35.2263	35.4776	35.4499		34.1139	5	34.1909	34.0679	34.0181		34.5482	5	34.5795	34.659	34.672		34.8792	5
35.1899	4	35.4091	35.2785	35.2297		35.7765	4	36.0152	35.9061	35.9312		32.318	5	32.0931	31.998	32.0061		34.9983	5	34.6678	34.5463	34.5622		32.4625	5	32.627	32.7551	32.8525		35.2331	4	35.2311	35.4793	35.4526		34.0991	5	34.1874	34.064	34.0141		34.5406	5	34.5763	34.655	34.6681		34.8511	5
35.2067	4	35.4117	35.2801	35.2314		35.7944	4	36.0187	35.9079	35.9331		32.3145	5	32.0902	31.9948	32.004		34.9945	5	34.6597	34.5383	34.5553		32.4611	5	32.6227	32.7503	32.8487		35.2344	4	35.2358	35.481	35.4552		34.0896	5	34.184	34.0602	34.01		34.5504	5	34.5731	34.6509	34.6643		34.825	5
35.2095	4	35.4144	35.2816	35.233		35.8079	4	36.0221	35.9096	35.935		32.3129	5	32.0873	31.9916	32.002		34.9894	5	34.6517	34.5304	34.5484		32.4589	5	32.6185	32.7456	32.8449		35.2304	4	35.2406	35.4826	35.4579		34.0792	5	34.1805	34.0564	34.0061		34.5588	5	34.5699	34.6469	34.6604		34.8134	5
35.2134	4	35.417	35.2831	35.2347		35.805	4	36.0255	35.9114	35.9369		32.3142	5	32.0844	31.9884	32		34.9847	5	34.6437	34.5226	34.5416		32.4529	5	32.6142	32.7409	32.8411		35.2275	4	35.2453	35.4842	35.4605		34.0776	5	34.1771	34.0527	34.0021		34.5595	5	34.5667	34.6429	34.6566		34.811	5
35.2123	4	35.4197	35.2846	35.2363		35.7901	4	36.029	35.9131	35.9388		32.318	5	32.0816	31.9852	31.998		34.9772	5	34.6357	34.5149	34.5348		32.4501	5	32.61	32.7363	32.8374		35.2303	4	35.25	35.4858	35.4631		34.0738	5	34.1737	34.0489	33.9982		34.5634	5	34.5635	34.6389	34.6528		34.8002	5
35.207	4	35.4223	35.2861	35.2379		35.7797	4	36.0324	35.9148	35.9407		32.328	5	32.0787	31.9821	31.996		34.9691	5	34.6279	34.5072	34.5281		32.4515	5	32.6059	32.7317	32.8337		35.2314	4	35.2547	35.4873	35.4656		34.0652	5	34.1703	34.0452	33.9944		34.5677	5	34.5604	34.6349	34.649		34.79	5
35.2148	4	35.4249	35.2876	35.2395		35.771	4	36.0357	35.9165	35.9425		32.3402	5	32.0759	31.979	31.994		34.9555	5	34.62	34.4996	34.5215		32.4512	5	32.6017	32.7272	32.83		35.2314	4	35.2593	35.4888	35.4682		34.0637	5	34.167	34.0416	33.9905		34.5688	4	34.5669	34.6439	34.6574		34.7732	5
35.2157	4	35.4275	35.2891	35.2411		35.7645	4	36.0391	35.9182	35.9444		32.3493	5	32.0731	31.9759	31.9921		34.9361	5	34.6123	34.4921	34.5149		32.4513	5	32.5976	32.7227	32.8264		35.229	4	35.264	35.4903	35.4707		34.0596	5	34.1636	34.0379	33.9867		34.5562	5	34.5637	34.6399	34.6536		34.7657	5
35.2146	4	35.4301	35.2906	35.2427		35.7659	4	36.0425	35.9199	35.9462		32.3364	5	32.0703	31.9728	31.9902		34.9213	5	34.6046	34.4846	34.5084		32.4603	5	32.5935	32.7182	32.8228		35.2262	4	35.2686	35.4917	35.4732		34.0472	5	34.1603	34.0343	33.983		34.5486	5	34.5606	34.6359	34.6498		34.7586	5
35.2151	4	35.4327	35.2921	35.2443		35.7559	4	36.0459	35.9215	35.9481		32.3291	5	32.0675	31.9698	31.9883		34.9193	5	34.5969	34.4772	34.5019		32.461	5	32.5894	32.7138	32.8192		35.2426	4	35.2733	35.4931	35.4756		34.0408	5	34.157	34.0308	33.9792		34.5469	5	34.5574	34.632	34.646		34.7601	5
35.22	4	35.4353	35.2935	35.2459		35.7502	4	36.0492	35.9232	35.9499		32.3301	5	32.0647	31.9667	31.9864		34.9092	5	34.5893	34.4699	34.4956		32.456	5	32.5854	32.7094	32.8157		35.2656	4	35.2779	35.4945	35.4781		34.0417	5	34.1538	34.0272	33.9755		34.5467	5	34.5543	34.628	34.6423		34.7591	5
35.2108	4	35.4379	35.295	35.2475		35.7499	4	36.0526	35.9248	35.9517		32.3309	5	32.0619	31.9637	31.9845		34.9002	5	34.5817	34.4626	34.4892		32.4497	5	32.5814	32.705	32.8122		35.2731	4	35.2825	35.4959	35.4805		34.0407	5	34.1505	34.0237	33.9719		34.5434	5	34.5511	34.6241	34.6385		34.7637	5
35.216	4	35.4405	35.2964	35.2491		35.7442	4	36.0559	35.9265	35.9535		32.3209	5	32.0592	31.9608	31.9827		34.8925	5	34.5742	34.4554	34.4829		32.4417	5	32.5774	32.7007	32.8087		35.2776	4	35.2871	35.4972	35.4829		34.0417	5	34.1473	34.0202	33.9682		34.5464	5	34.548	34.6202	34.6348		34.7601	5
35.2179	4	35.443	35.2979	35.2506		35.7361	4	36.0592	35.9281	35.9553		32.3186	5	32.0564	31.9578	31.9809		34.8853	5	34.5668	34.4483	34.4767		32.4357	5	32.5734	32.6964	32.8053		35.2791	4	35.2916	35.4985	35.4852		34.0416	5	34.1441	34.0167	33.9646		34.5485	5	34.5449	34.6164	34.6311		34.7487	5
35.2122	4	35.4456	35.2993	35.2522		35.7285	4	36.0625	35.9297	35.9571		32.3264	5	32.0537	31.9549	31.9791		34.8843	5	34.5594	34.4412	34.4706		32.4317	5	32.5695	32.6922	32.8019		35.2839	4	35.2962	35.4997	35.4876		34.0481	5	34.1409	34.0133	33.9611		34.5429	5	34.5417	34.6125	34.6274		34.7268	5
35.2168	4	35.4481	35.3007	35.2538		35.7252	4	36.0658	35.9313	35.9588		32.3258	5	32.051	31.952	31.9773		34.8821	5	34.552	34.4342	34.4644		32.4353	5	32.5655	32.688	32.7986		35.2958	4	35.3008	35.501	35.49		34.0561	5	34.1377	34.0099	33.9575		34.5499	5	34.5386	34.6087	34.6238		34.7153	5
35.2054	4	35.4506	35.3022	35.2553		35.7207	4	36.0691	35.9328	35.9606		32.3318	5	32.0483	31.9491	31.9755		34.8793	5	34.5447	34.4272	34.4584		32.4382	5	32.5616	32.6838	32.7952		35.3005	4	35.3053	35.5022	35.4923		34.056	5	34.1346	34.0065	33.954		34.5555	5	34.5355	34.6049	34.6202		34.7057	5
35.2072	4	35.4532	35.3036	35.2569		35.7148	4	36.0724	35.9344	35.9624		32.3358	5	32.0456	31.9462	31.9737		34.8728	5	34.5375	34.4204	34.4524		32.441	5	32.5578	32.6797	32.7919		35.3051	4	35.3098	35.5034	35.4946		34.0554	5	34.1315	34.0032	33.9505		34.5513	5	34.5324	34.6011	34.6165		34.7048	5
35.1951	4	35.4557	35.305	35.2584		35.7244	4	36.0756	35.936	35.9641		32.3397	5	32.0429	31.9434	31.972		34.8743	5	34.5303	34.4135	34.4464		32.4441	5	32.5539	32.6756	32.7887		35.3142	4	35.3143	35.5046	35.4969		34.0553	5	34.1284	33.9999	33.9471		34.5491	5	34.5293	34.5973	34.6129		34.7066	5
35.1844	4	35.4582	35.3064	35.2599		35.7328	4	36.0789	35.9375	35.9658		32.3533	5	32.0403	31.9405	31.9702		34.8702	5	34.5231	34.4067	34.4406		32.4476	4	32.5626	32.6837	32.7961		35.3191	4	35.3188	35.5058	35.4992		34.0441	4	34.1376	34.0108	33.9582		34.5446	5	34.5263	34.5936	34.6094		34.7035	5
35.1784	4	35.4607	35.3078	35.2615		35.744	4	36.0821	35.939	35.9676		32.3668	5	32.0376	31.9377	31.9685		34.8666	5	34.516	34.4	34.4347		32.4394	5	32.5588	32.6796	32.7928		35.3227	4	35.3233	35.507	35.5014		34.0326	5	34.1345	34.0074	33.9547		34.5419	5	34.5232	34.5899	34.6058		34.7041	5
35.1835	4	35.4632	35.3092	35.263		35.758	4	36.0854	35.9406	35.9693		32.3714	5	32.035	31.9349	31.9668		34.8575	6	34.5243	34.4093	34.4431		32.4347	5	32.5549	32.6755	32.7895		35.3342	4	35.3277	35.5082	35.5037		34.0306	5	34.1314	34.0041	33.9512		34.5342	5	34.5201	34.5862	34.6023		34.7097	5
35.1897	4	35.4656	35.3106	35.2645		35.7656	4	36.0886	35.9421	35.971		32.3881	5	32.0324	31.9321	31.9651		34.8568	6	34.5326	34.4186	34.4515		32.4311	5	32.5511	32.6715	32.7863		35.3352	4	35.3322	35.5093	35.5059		34.0279	5	34.1283	34.0008	33.9477		34.5343	5	34.5171	34.5825	34.5988		34.7192	5
35.1871	4	35.4681	35.3119	35.266		35.7719	4	36.0918	35.9436	35.9727		32.4182	4	32.0397	31.9409	31.9721		34.8615	6	34.5408	34.4278	34.4598		32.4304	5	32.5473	32.6675	32.7831		35.3302	4	35.3366	35.5104	35.5081		34.0327	5	34.1252	33.9975	33.9443		34.5373	5	34.514	34.5789	34.5953		34.7217	5
35.1829	4	35.4706	35.3133	35.2675		35.7816	4	36.095	35.9451	35.9744		32.4033	5	32.0371	31.938	31.9703		34.8654	4	34.549	34.437	34.4681		32.433	5	32.5435	32.6635	32.7799		35.3255	4	35.341	35.5115	35.5103		34.0374	5	34.1221	33.9942	33.9409		34.5404	5	34.511	34.5752	34.5918		34.7172	4
35.18	4	35.473	35.3147	35.269		35.7807	4	36.0982	35.9465	35.9761		32.3729	5	32.0344	31.9352	31.9685		34.8614	4	34.5572	34.4462	34.4763		32.4386	5	32.5398	32.6595	32.7768		35.3209	4	35.3454	35.5126	35.5125		34.0388	5	34.1191	33.991	33.9376		34.5498	5	34.508	34.5716	34.5884		34.6993	5
35.1792	4	35.4755	35.316	35.2705		35.7833	4	36.1014	35.948	35.9778		32.3496	5	32.0318	31.9324	31.9668		34.852	4	34.5654	34.4552	34.4845		32.4417	5	32.536	32.6556	32.7738		35.3093	4	35.3498	35.5137	35.5146		34.0446	5	34.1161	33.9878	33.9343		34.5529	6	34.5147	34.5811	34.5971		34.6842	5
35.178	4	35.4779	35.3174	35.272		35.7931	4	36.1046	35.9495	35.9794		32.3353	5	32.0292	31.9296	31.965		34.8418	5	34.558	34.4481	34.4782		32.4462	5	32.5323	32.6518	32.7708		35.3038	4	35.3542	35.5147	35.5167		34.0481	5	34.1131	33.9846	33.931		34.5543	6	34.5213	34.5904	34.6058		34.6788	5
35.1838	4	35.4803	35.3187	35.2735		35.8031	4	36.1077	35.951	35.9811		32.3293	5	32.0266	31.9268	31.9633		34.8339	5	34.5506	34.4411	34.472		32.4526	5	32.5286	32.6479	32.7678		35.2972	4	35.3586	35.5157	35.5188		34.0521	5	34.1101	33.9815	33.9277		34.5619	6	34.528	34.5998	34.6144		34.6671	5
35.1904	4	35.4828	35.32	35.275		35.8151	4	36.1109	35.9524	35.9827		32.3221	5	32.024	31.9241	31.9616		34.8254	4	34.5588	34.4502	34.4803		32.4552	5	32.525	32.6441	32.7649		35.2883	4	35.3629	35.5167	35.5209		34.0556	5	34.1071	33.9784	33.9245		34.5722	6	34.5346	34.609	34.623		34.665	5
35.1872	4	35.4852	35.3214	35.2764		35.8237	4	36.1141	35.9539	35.9844		32.3145	5	32.0215	31.9213	31.9598		34.8178	5	34.5515	34.4431	34.474		32.4578	5	32.5213	32.6404	32.7619		35.2845	4	35.3673	35.5176	35.523		34.0583	5	34.1042	33.9753	33.9212		34.5888	6	34.5413	34.6182	34.6315		34.6656	5
35.1873	4	35.4876	35.3227	35.2779		35.8291	4	36.1172	35.9553	35.986		32.3093	5	32.0189	31.9186	31.9581		34.8109	5	34.5442	34.4361	34.4679		32.4658	5	32.5177	32.6367	32.7591		35.2784	4	35.3716	35.5186	35.525		34.0602	5	34.1013	33.9722	33.9181		34.6052	6	34.5479	34.6273	34.6399		34.6655	5
35.1811	4	35.49	35.324	35.2794		35.8381	4	36.1203	35.9568	35.9876		32.3032	5	32.0164	31.9159	31.9565		34.8124	5	34.5369	34.4292	34.4618		32.4689	5	32.5141	32.633	32.7562		35.2756	4	35.3759	35.5195	35.527		34.0543	5	34.0984	33.9692	33.9149		34.626	6	34.5545	34.6364	34.6483		34.6658	5
35.1808	4	35.4924	35.3253	35.2808		35.8455	4	36.1234	35.9582	35.9893		32.3021	5	32.0138	31.9132	31.9548		34.8142	5	34.5297	34.4223	34.4558		32.478	6	32.523	32.6413	32.7638		35.2718	4	35.3802	35.5204	35.5291		34.0484	5	34.0955	33.9662	33.9118		34.6503	6	34.561	34.6454	34.6566		34.6713	5
35.1685	4	35.4947	35.3266	35.2823		35.8525	4	36.1265	35.9597	35.9909		32.2987	5	32.0113	31.9105	31.9531		34.8125	5	34.5226	34.4155	34.4498		32.4918	6	32.5318	32.6496	32.7714		35.2625	4	35.3845	35.5212	35.531		34.046	5	34.0926	33.9632	33.9087		34.6674	6	34.5676	34.6543	34.6649		34.6698	5
35.1624	4	35.4971	35.3279	35.2837		35.8569	4	36.1296	35.9611	35.9925		32.2908	5	32.0088	31.9079	31.9515		34.802	5	34.5155	34.4087	34.4439		32.5071	6	32.5406	32.6579	32.7789		35.2574	4	35.3888	35.5221	35.533		34.0406	5	34.0898	33.9602	33.9056		34.6997	6	34.5741	34.6631	34.6731		34.6632	5
35.1587	4	35.4995	35.3292	35.2851		35.8319	5	36.1197	35.947	35.9753		32.2877	5	32.0063	31.9053	31.9498		34.8032	5	34.5084	34.402	34.438		32.53	6	32.5493	32.6661	32.7863		35.2563	4	35.3931	35.5229	35.535		34.0335	5	34.0869	33.9572	33.9026		34.7333	6	34.5806	34.672	34.6812		34.6546	5
35.1686	4	35.5018	35.3305	35.2866		35.7947	5	36.1098	35.9329	35.9584		32.2889	5	32.0038	31.9027	31.9482		34.797	5	34.5014	34.3954	34.4322		32.5643	6	32.558	32.6743	32.7937		35.2519	4	35.3973	35.5238	35.5369		34.0289	5	34.0841	33.9543	33.8996		34.7575	6	34.5871	34.6807	34.6893		34.6496	5
35.1762	4	35.5042	35.3317	35.288		35.76	5	36.0999	35.919	35.9416		32.2901	5	32.0014	31.9001	31.9466		34.7957	5	34.4945	34.3888	34.4265		32.6011	6	32.5667	32.6824	32.8011		35.2463	4	35.4015	35.5246	35.5388		34.0291	5	34.0813	33.9514	33.8966		34.789	6	34.5936	34.6894	34.6973		34.6517	5
35.1795	4	35.5065	35.333	35.2894		35.7241	5	36.09	35.9052	35.9251		32.2991	5	31.9989	31.8975	31.945		34.7974	5	34.4876	34.3823	34.4208		32.6453	6	32.5753	32.6905	32.8085		35.2419	4	35.4058	35.5253	35.5408		34.0304	5	34.0786	33.9485	33.8936		34.8031	6	34.6	34.698	34.7053		34.6537	5
35.1935	4	35.5089	35.3343	35.2908		35.6977	5	36.0802	35.8915	35.9087		32.3101	5	31.9964	31.8949	31.9434		34.8013	5	34.4807	34.3758	34.4152		32.6795	6	32.5839	32.6985	32.8158		35.2473	4	35.41	35.5261	35.5426		34.0296	5	34.0758	33.9457	33.8907		34.8256	6	34.6064	34.7066	34.7132		34.6645	5
35.2024	4	35.5112	35.3355	35.2922		35.6841	4	36.0835	35.8934	35.9107		32.3214	5	31.994	31.8924	31.9419		34.8038	5	34.4739	34.3694	34.4096		32.7126	6	32.5925	32.7065	32.8231		35.2432	4	35.4142	35.5269	35.5445		34.0324	5	34.0731	33.9428	33.8878		34.8431	6	34.6128	34.7151	34.7211		34.6738	5
35.2162	4	35.5135	35.3368	35.2936		35.6858	4	36.0867	35.8952	35.9127		32.3401	6	32.0015	31.9013	31.9489		34.8038	5	34.4672	34.363	34.4041		32.7388	4	32.601	32.7145	32.8304		35.2453	4	35.4183	35.5277	35.5464		34.0388	5	34.0704	33.94	33.8849		34.8541	6	34.6192	34.7235	34.7288		34.6742	5
35.2109	4	35.5158	35.338	35.295		35.6917	4	36.0899	35.897	35.9147		32.3601	6	32.0089	31.9102	31.956		34.7936	5	34.4604	34.3567	34.3986		32.7385	4	32.6096	32.7224	32.8376		35.2472	4	35.4225	35.5284	35.5482		34.0392	5	34.0677	33.9372	33.8821		34.8642	6	34.6256	34.7319	34.7366		34.674	5
35.21	4	35.5181	35.3392	35.2964		35.701	4	36.0931	35.8988	35.9166		32.383	6	32.0164	31.919	31.963		34.7741	5	34.4538	34.3505	34.3932		32.7148	4	32.618	32.7302	32.8448		35.2503	4	35.4267	35.5292	35.55		34.0361	5	34.065	33.9344	33.8792		34.8723	6	34.632	34.7403	34.7443		34.6795	5
35.1968	4	35.5204	35.3405	35.2977		35.7008	4	36.0963	35.9006	35.9186		32.4102	4	32.0238	31.9278	31.9699		34.7707	5	34.4472	34.3443	34.3878		32.6891	4	32.6265	32.7381	32.8519		35.2612	4	35.4308	35.5299	35.5519		34.0377	5	34.0623	33.9317	33.8764		34.8804	6	34.6383	34.7485	34.7519		34.6833	5
35.1851	4	35.5227	35.3417	35.2991		35.7041	4	36.0995	35.9024	35.9205		32.4042	4	32.0312	31.9364	31.9769		34.7597	5	34.4406	34.3381	34.3825		32.6646	4	32.6349	32.7458	32.859		35.2677	4	35.435	35.5306	35.5537		34.045	5	34.0597	33.9289	33.8737		34.8825	6	34.6446	34.7568	34.7594		34.6838	5
35.1753	4	35.525	35.3429	35.3004		35.7152	4	36.1027	35.9042	35.9225		32.3822	4	32.0385	31.9451	31.9837		34.7498	5	34.4341	34.332	34.3773		32.6394	4	32.6433	32.7536	32.8661		35.2711	4	35.4391	35.5313	35.5554		34.0479	5	34.0571	33.9262	33.8709		34.8806	6	34.6509	34.7649	34.767		34.6618	5
35.1655	4	35.5272	35.3441	35.3018		35.7415	4	36.1059	35.906	35.9244		32.3658	4	32.0458	31.9536	31.9906		34.7421	5	34.4276	34.326	34.3721		32.6203	5	32.6389	32.7489	32.8622		35.2816	4	35.4432	35.532	35.5572		34.0453	5	34.0545	33.9235	33.8682		34.884	6	34.6572	34.773	34.7744		34.6467	4
35.1638	4	35.5295	35.3453	35.3031		35.7638	4	36.1091	35.9077	35.9263		32.3518	5	32.0432	31.9505	31.9883		34.7423	5	34.4211	34.32	34.3669		32.6054	5	32.6346	32.7442	32.8583		35.291	4	35.4473	35.5326	35.5589		34.0399	5	34.0519	33.9209	33.8655		34.8926	6	34.6634	34.7811	34.7818		34.6407	4
35.1603	4	35.5317	35.3465	35.3044		35.7721	4	36.1122	35.9095	35.9283		32.3415	5	32.0405	31.9475	31.986		34.7486	5	34.4147	34.3141	34.3618		32.5965	5	32.6302	32.7396	32.8545		35.3005	4	35.4514	35.5333	35.5607		34.027	5	34.0493	33.9182	33.8628		34.8901	6	34.6697	34.7891	34.7892		34.6259	5
35.1529	4	35.534	35.3477	35.3057		35.7741	4	36.1154	35.9112	35.9302		32.3348	5	32.0379	31.9445	31.9837		34.7462	5	34.4084	34.3082	34.3568		32.5883	5	32.6259	32.735	32.8507		35.3034	4	35.4554	35.5339	35.5624		34.0266	5	34.0467	33.9156	33.8602		34.8853	6	34.6759	34.7971	34.7965		34.6194	5
35.1638	4	35.5362	35.3489	35.307		35.7764	4	36.1185	35.9129	35.932		32.335	5	32.0352	31.9414	31.9814		34.7441	5	34.4021	34.3024	34.3518		32.5794	5	32.6216	32.7304	32.847		35.3127	4	35.4595	35.5345	35.5641		34.0322	5	34.0442	33.913	33.8575		34.8786	6	34.6821	34.805	34.8037		34.6198	5
35.1696	4	35.5385	35.3501	35.3083		35.7813	4	36.1216	35.9146	35.9339		32.3372	5	32.0326	31.9384	31.9792		34.7319	5	34.3958	34.2966	34.3469		32.5716	5	32.6174	32.7259	32.8432		35.3174	4	35.4635	35.5351	35.5657		34.0338	5	34.0417	33.9104	33.8549		34.8781	6	34.6883	34.8128	34.8109		34.6262	5
35.1758	4	35.5407	35.3513	35.3096		35.7834	4	36.1247	35.9163	35.9358		32.3352	5	32.03	31.9355	31.9769		34.725	5	34.3896	34.2909	34.3421		32.5754	5	32.6132	32.7215	32.8396		35.3193	4	35.4676	35.5357	35.5674		34.036	5	34.0392	33.9078	33.8524		34.8736	6	34.6945	34.8206	34.8181		34.6266	5
35.1842	4	35.5429	35.3524	35.3109		35.7878	4	36.1278	35.918	35.9377		32.3364	5	32.0274	31.9325	31.9747		34.7184	5	34.3834	34.2852	34.3373		32.5719	5	32.609	32.7171	32.8359		35.3261	4	35.4716	35.5363	35.569		34.0416	5	34.0367	33.9053	33.8498		34.8771	6	34.7006	34.8284	34.8252		34.6306	5
35.2026	4	35.5451	35.3536	35.3122		35.8028	4	36.1309	35.9196	35.9395		32.3397	5	32.0248	31.9296	31.9726		34.7125	5	34.3773	34.2796	34.3325		32.5591	5	32.6048	32.7127	32.8323		35.3262	4	35.4756	35.5369	35.5706		34.0445	5	34.0342	33.9027	33.8473		34.8894	6	34.7068	34.8361	34.8323		34.6401	5
35.2231	4	35.5473	35.3548	35.3134		35.8175	4	36.134	35.9213	35.9414		32.3376	6	32.0322	31.9382	31.9794		34.6988	4	34.3861	34.2895	34.3414		32.5501	5	32.6007	32.7083	32.8287		35.3301	4	35.4796	35.5374	35.5722		34.0461	5	34.0317	33.9002	33.8448		34.8968	6	34.7129	34.8437	34.8393		34.6434	5
35.2436	4	35.5495	35.3559	35.3147		35.8352	4	36.1371	35.9229	35.9432		32.3431	6	32.0395	31.9467	31.9862		34.6935	4	34.3949	34.2995	34.3503		32.5496	5	32.5966	32.7041	32.8252		35.3369	4	35.4836	35.538	35.5738		34.0479	5	34.0293	33.8977	33.8423		34.9045	6	34.719	34.8513	34.8463		34.6418	5
35.2549	4	35.5517	35.3571	35.3159		35.8435	4	36.1401	35.9246	35.945		32.361	6	32.0468	31.9552	31.993		34.7045	4	34.4037	34.3093	34.3591		32.5496	5	32.5925	32.6998	32.8217		35.3549	4	35.4876	35.5385	35.5754		34.0479	5	34.0269	33.8953	33.8398		34.9118	6	34.725	34.8589	34.8532		34.6402	5
35.2574	4	35.5539	35.3582	35.3172		35.841	4	36.1432	35.9262	35.9468		32.4053	6	32.0541	31.9636	31.9998		34.7164	4	34.4124	34.3191	34.3679		32.5538	5	32.5884	32.6956	32.8181		35.3764	4	35.4915	35.5391	35.5769		34.0465	5	34.0244	33.8928	33.8374		34.9058	6	34.7311	34.8664	34.86		34.6346	5
35.2689	4	35.556	35.3593	35.3184		35.8419	4	36.1462	35.9278	35.9486		32.4474	6	32.0614	31.972	32.0065		34.7093	4	34.4211	34.3289	34.3766		32.5567	5	32.5844	32.6914	32.8147		35.3952	4	35.4955	35.5396	35.5785		34.0448	5	34.022	33.8904	33.8349		34.9073	6	34.7371	34.8738	34.8669		34.6385	5
35.2811	4	35.5582	35.3605	35.3197		35.8437	4	36.1493	35.9294	35.9504		32.4724	6	32.0687	31.9803	32.0131		34.7143	4	34.4298	34.3386	34.3853		32.557	4	32.5929	32.6994	32.8219		35.4053	4	35.4994	35.5401	35.58		34.0492	5	34.0197	33.888	33.8325		34.9069	6	34.7432	34.8812	34.8736		34.6349	5
35.2973	4	35.5604	35.3616	35.3209		35.8387	4	36.1523	35.931	35.9522		32.491	6	32.0759	31.9885	32.0198		34.7119	5	34.4233	34.3325	34.3801		32.5579	5	32.5889	32.6952	32.8184		35.4067	4	35.5033	35.5406	35.5815		34.0596	5	34.0173	33.8856	33.8301		34.9007	6	34.7492	34.8886	34.8803		34.6238	5
35.3128	4	35.5625	35.3627	35.3221		35.841	4	36.1553	35.9325	35.954		32.5078	6	32.0831	31.9967	32.0264		34.7126	4	34.432	34.3422	34.3888		32.5561	5	32.5848	32.691	32.8148		35.4011	4	35.5072	35.5411	35.5829		34.0704	5	34.015	33.8832	33.8278		34.8961	6	34.7552	34.8959	34.887		34.6231	5
35.3253	4	35.5646	35.3638	35.3233		35.8445	4	36.1583	35.9341	35.9557		32.5355	6	32.0903	32.0049	32.0329		34.7067	4	34.4406	34.3519	34.3974		32.5548	5	32.5808	32.6869	32.8114		35.3972	4	35.5111	35.5415	35.5844		34.0662	5	34.0126	33.8808	33.8254		34.894	6	34.7611	34.9032	34.8937		34.6249	5
35.339	4	35.5668	35.365	35.3245		35.8548	4	36.1613	35.9356	35.9575		32.5645	6	32.0974	32.0129	32.0394		34.7108	5	34.4341	34.3457	34.392		32.5534	5	32.5768	32.6828	32.8079		35.3916	4	35.515	35.542	35.5859		34.0554	5	34.0103	33.8785	33.8231		34.8838	6	34.7671	34.9104	34.9002		34.6319	5
35.3521	4	35.5689	35.3661	35.3258		35.8627	4	36.1643	35.9372	35.9592		32.6111	6	32.1046	32.0209	32.0459		34.7102	5	34.4276	34.3396	34.3867		32.5576	5	32.5729	32.6787	32.8045		35.3896	4	35.5189	35.5425	35.5873		34.0422	5	34.008	33.8761	33.8208		34.8743	4	34.773	34.9175	34.9068		34.6394	5
35.3658	4	35.571	35.3672	35.3269		35.8689	4	36.1673	35.9387	35.9609		32.6553	6	32.1117	32.0289	32.0523		34.6994	5	34.4212	34.3335	34.3815		32.5632	5	32.5689	32.6747	32.8011		35.3928	4	35.5228	35.5429	35.5887		34.0374	5	34.0057	33.8738	33.8185		34.8467	4	34.7789	34.9246	34.9133		34.6463	5
35.3789	4	35.5731	35.3683	35.3281		35.8722	4	36.1703	35.9402	35.9626		32.6843	6	32.1187	32.0367	32.0587		34.6883	5	34.4148	34.3275	34.3762		32.5677	5	32.565	32.6707	32.7977		35.4097	4	35.5266	35.5434	35.5901		34.0387	5	34.0034	33.8715	33.8163		34.8011	4	34.7848	34.9317	34.9197		34.6585	5
35.3861	4	35.5752	35.3694	35.3293		35.8799	4	36.1732	35.9417	35.9643		32.7178	6	32.1258	32.0446	32.0651		34.6803	5	34.4084	34.3215	34.3711		32.5762	6	32.5737	32.6788	32.8051		35.4272	4	35.5304	35.5439	35.5915		34.0387	5	34.0012	33.8692	33.814		34.7557	4	34.7907	34.9387	34.9261		34.675	5
35.3908	4	35.5773	35.3704	35.3305		35.8805	4	36.1762	35.9432	35.966		32.742	6	32.1328	32.0523	32.0714		34.6626	5	34.4021	34.3156	34.366		32.5828	6	32.5823	32.6869	32.8124		35.4455	4	35.5343	35.5443	35.5929		34.0371	5	33.999	33.867	33.8118		34.7237	4	34.7966	34.9457	34.9325		34.6888	5
35.3872	4	35.5794	35.3715	35.3317		35.8752	4	36.1791	35.9447	35.9676		32.7497	6	32.1398	32.06	32.0777		34.6578	5	34.3958	34.3097	34.3609		32.5951	6	32.5909	32.695	32.8196		35.458	4	35.5381	35.5448	35.5942		34.0408	5	33.9967	33.8647	33.8096		34.6936	5	34.7928	34.94	34.9266		34.7	6
35.3831	4	35.5815	35.3726	35.3329		35.8696	4	36.182	35.9461	35.9693		32.7655	6	32.1468	32.0677	32.084		34.6374	5	34.3896	34.3039	34.3559		32.6168	6	32.5994	32.703	32.8268		35.4636	4	35.5419	35.5453	35.5956		34.0488	5	33.9945	33.8625	33.8074		34.6646	5	34.7891	34.9345	34.9207		34.716	6
35.3824	4	35.5836	35.3737	35.334		35.8589	4	36.185	35.9476	35.9709		32.7909	6	32.1538	32.0753	32.0902		34.6153	5	34.3834	34.2981	34.351		32.6534	4	32.6079	32.7109	32.834		35.4728	4	35.5457	35.5458	35.5969		34.0533	5	33.9923	33.8603	33.8053		34.6465	4	34.7949	34.9414	34.9271		34.7425	6
35.3844	4	35.5857	35.3747	35.3352		35.8511	4	36.1879	35.949	35.9726		32.8057	6	32.1607	32.0828	32.0964		34.5848	5	34.3773	34.2924	34.3461		32.6776	4	32.6164	32.7188	32.8411		35.4817	4	35.5495	35.5463	35.5982		34.0563	6	34.0021	33.8721	33.8174		34.6219	4	34.8008	34.9484	34.9335		34.786	6
35.3973	4	35.5877	35.3758	35.3363		35.8427	4	36.1908	35.9505	35.9742		32.8124	6	32.1676	32.0903	32.1025		34.5665	5	34.3712	34.2867	34.3412		32.6945	4	32.6249	32.7267	32.8483		35.4882	4	35.5532	35.5468	35.5995		34.0625	6	34.0118	33.8838	33.8296		34.5965	5	34.797	34.9427	34.9275		34.8374	6
35.4053	4	35.5898	35.3769	35.3375		35.8298	4	36.1937	35.9519	35.9758		32.8176	6	32.1745	32.0977	32.1087		34.5506	5	34.3652	34.2811	34.3364		32.7079	4	32.6333	32.7346	32.8553		35.4949	4	35.557	35.5473	35.6008		34.0801	6	34.0215	33.8954	33.8416		34.5852	5	34.7932	34.9371	34.9217		34.8926	6
35.411	4	35.5918	35.3779	35.3386		35.8147	5	36.1834	35.9377	35.9586		32.8208	6	32.1814	32.1051	32.1147		34.5365	5	34.3591	34.2756	34.3317		32.7208	4	32.6417	32.7424	32.8624		35.4919	4	35.5608	35.5478	35.6021		34.1077	6	34.0312	33.907	33.8536		34.5882	5	34.7895	34.9316	34.9158		34.9526	6
35.4145	4	35.5939	35.379	35.3398		35.7945	4	36.1864	35.9392	35.9603		32.811	6	32.1882	32.1124	32.1208		34.5184	5	34.3532	34.2701	34.3269		32.7281	4	32.6501	32.7502	32.8694		35.4634	4	35.5645	35.5483	35.6033		34.1508	6	34.0408	33.9185	33.8655		34.5923	5	34.7857	34.926	34.91		34.9808	6
35.4163	4	35.5959	35.38	35.3409		35.7893	4	36.1893	35.9407	35.962		32.8018	6	32.1951	32.1197	32.1268		34.498	5	34.3473	34.2646	34.3222		32.738	4	32.6584	32.7579	32.8764		35.4304	4	35.5682	35.5488	35.6046		34.2018	4	34.0504	33.9299	33.8773		34.5837	5	34.782	34.9205	34.9042		35.0104	6
[truncated: 85,023 more rows]
[truncated: 13 more columns]
